# Supplementary material
Source: PubMed Central journal article supplement (PMC8270762)
Supplement: mmc2.pdf [file mmc2.pdf]

# THE LANCET

## Public Health

### Supplementary appendix 2

This appendix formed part of the original submission and has been peer reviewed. We post it as supplied by the authors.

This online publication has been corrected. The corrected version first appeared at [thelancet.com/public-health](http://thelancet.com/public-health) on September 23, 2021

Supplement to: Lane CR, Sherry NL, Porter AF, et al. Genomics-informed responses in the elimination of COVID-19 in Victoria, Australia: an observational, genomic epidemiological study. *Lancet Public Health* 2021; published online July 9. [http://dx.doi.org/10.1016/S2468-2667\(21\)00133-X](http://dx.doi.org/10.1016/S2468-2667(21)00133-X).

| VIC_ID   | GISAID_ID       |
|----------|-----------------|
| VIC08    | EPI_ISL_416514  |
| VIC09    | EPI_ISL_416515  |
| VIC10    | EPI_ISL_416516  |
| VIC100   | EPI_ISL_419812  |
| VIC1000  | EPI_ISL_430484  |
| VIC10004 | EPI_ISL_562761  |
| VIC10006 | EPI_ISL_562762  |
| VIC10007 | EPI_ISL_562078  |
| VIC10009 | EPI_ISL_562728  |
| VIC10012 | EPI_ISL_561676  |
| VIC10017 | EPI_ISL_562763  |
| VIC10019 | EPI_ISL_562764  |
| VIC1002  | EPI_ISL_430486  |
| VIC10020 | EPI_ISL_562765  |
| VIC10021 | EPI_ISL_561865  |
| VIC10023 | EPI_ISL_562637  |
| VIC10024 | EPI_ISL_562766  |
| VIC10025 | EPI_ISL_562767  |
| VIC10026 | EPI_ISL_562768  |
| VIC10029 | EPI_ISL_562769  |
| VIC1003  | EPI_ISL_430487  |
| VIC10031 | EPI_ISL_562770  |
| VIC10032 | EPI_ISL_562771  |
| VIC10033 | EPI_ISL_561482  |
| VIC10035 | EPI_ISL_562772  |
| VIC10037 | EPI_ISL_562773  |
| VIC10038 | EPI_ISL_562083  |
| VIC1004  | EPI_ISL_430488  |
| VIC10040 | EPI_ISL_561436  |
| VIC10041 | EPI_ISL_562774  |
| VIC10043 | EPI_ISL_562775  |
| VIC10045 | EPI_ISL_562776  |
| VIC10047 | EPI_ISL_1055265 |
| VIC1005  | EPI_ISL_430491  |
| VIC10051 | EPI_ISL_562777  |
| VIC10055 | EPI_ISL_562778  |
| VIC10059 | Rejected        |
| VIC10060 | EPI_ISL_562779  |
| VIC10061 | EPI_ISL_562780  |
| VIC10062 | EPI_ISL_561838  |
| VIC10065 | EPI_ISL_562781  |
| VIC10066 | EPI_ISL_562782  |
| VIC10067 | EPI_ISL_562783  |
| VIC10068 | EPI_ISL_562784  |
| VIC10069 | EPI_ISL_562785  |
| VIC10075 | EPI_ISL_562786  |
| VIC10076 | EPI_ISL_562596  |
| VIC10077 | EPI_ISL_562116  |
| VIC10079 | EPI_ISL_561881  |
| VIC1008  | EPI_ISL_430473  |
| VIC10080 | EPI_ISL_562787  |

VIC10081 EPI\_ISL\_562788  
VIC10084 EPI\_ISL\_562730  
VIC10085 EPI\_ISL\_562789  
VIC10087 EPI\_ISL\_561538  
VIC10090 EPI\_ISL\_561859  
VIC10092 EPI\_ISL\_561592  
VIC10093 EPI\_ISL\_562790  
VIC101 EPI\_ISL\_419813  
VIC1010 EPI\_ISL\_430560  
VIC10108 EPI\_ISL\_562042  
VIC1011 EPI\_ISL\_430547  
VIC10111 EPI\_ISL\_562731  
VIC10112 EPI\_ISL\_561968  
VIC10113 EPI\_ISL\_561497  
VIC10114 EPI\_ISL\_561801  
VIC10115 EPI\_ISL\_562793  
VIC10116 EPI\_ISL\_562794  
VIC10117 EPI\_ISL\_561969  
VIC10118 EPI\_ISL\_562795  
VIC10119 EPI\_ISL\_561977  
VIC1012 EPI\_ISL\_430548  
VIC10120 EPI\_ISL\_562796  
VIC10121 EPI\_ISL\_562797  
VIC10122 EPI\_ISL\_562798  
VIC10124 EPI\_ISL\_562172  
VIC10125 EPI\_ISL\_562799  
VIC10127 EPI\_ISL\_562800  
VIC1013 EPI\_ISL\_430553  
VIC10130 EPI\_ISL\_562801  
VIC10131 EPI\_ISL\_562597  
VIC10132 EPI\_ISL\_562802  
VIC1014 EPI\_ISL\_430555  
VIC10147 EPI\_ISL\_562808  
VIC1015 EPI\_ISL\_430559  
VIC10155 EPI\_ISL\_562810  
VIC10156 EPI\_ISL\_561759  
VIC10158 EPI\_ISL\_561849  
VIC1016 EPI\_ISL\_430476  
VIC10160 EPI\_ISL\_561743  
VIC10165 EPI\_ISL\_562812  
VIC10167 EPI\_ISL\_562813  
VIC10170 EPI\_ISL\_562814  
VIC10174 EPI\_ISL\_562815  
VIC10176 EPI\_ISL\_561737  
VIC10177 EPI\_ISL\_562816  
VIC1018 EPI\_ISL\_430490  
VIC10182 EPI\_ISL\_562817  
VIC10185 EPI\_ISL\_561885  
VIC10187 EPI\_ISL\_562818  
VIC10189 EPI\_ISL\_562819  
VIC10190 EPI\_ISL\_561771  
VIC10191 EPI\_ISL\_562820

VIC10192 EPI\_ISL\_562821  
VIC10195 EPI\_ISL\_561681  
VIC10199 EPI\_ISL\_561932  
VIC102 EPI\_ISL\_419817  
VIC10200 EPI\_ISL\_562822  
VIC10202 EPI\_ISL\_562823  
VIC10203 EPI\_ISL\_561430  
VIC10204 EPI\_ISL\_561723  
VIC10206 EPI\_ISL\_561564  
VIC10209 EPI\_ISL\_561775  
VIC10212 EPI\_ISL\_562824  
VIC10213 EPI\_ISL\_561735  
VIC10215 EPI\_ISL\_562825  
VIC10216 EPI\_ISL\_562826  
VIC10218 EPI\_ISL\_562827  
VIC10219 EPI\_ISL\_562828  
VIC10220 EPI\_ISL\_561486  
VIC10221 EPI\_ISL\_562829  
VIC10223 EPI\_ISL\_562830  
VIC10226 EPI\_ISL\_561895  
VIC10227 EPI\_ISL\_562831  
VIC10229 EPI\_ISL\_562832  
VIC10231 EPI\_ISL\_561496  
VIC10232 EPI\_ISL\_562833  
VIC10234 EPI\_ISL\_562834  
VIC10235 EPI\_ISL\_562835  
VIC10238 EPI\_ISL\_562836  
VIC10239 Rejected  
VIC1024 EPI\_ISL\_430531  
VIC10242 EPI\_ISL\_562837  
VIC10244 EPI\_ISL\_562838  
VIC10245 EPI\_ISL\_562839  
VIC10250 EPI\_ISL\_562842  
VIC10251 EPI\_ISL\_562843  
VIC10253 EPI\_ISL\_562844  
VIC10256 EPI\_ISL\_562043  
VIC10257 Rejected  
VIC10260 EPI\_ISL\_562638  
VIC10261 EPI\_ISL\_561702  
VIC10262 EPI\_ISL\_561632  
VIC10263 EPI\_ISL\_562846  
VIC10273 EPI\_ISL\_561718  
VIC10274 EPI\_ISL\_561469  
VIC10275 EPI\_ISL\_561603  
VIC10279 EPI\_ISL\_562848  
VIC10280 EPI\_ISL\_562849  
VIC10281 EPI\_ISL\_562850  
VIC10283 EPI\_ISL\_562851  
VIC10284 EPI\_ISL\_562852  
VIC10285 EPI\_ISL\_562853  
VIC10288 EPI\_ISL\_562854  
VIC10290 EPI\_ISL\_562855

VIC10292 EPI\_ISL\_562856  
VIC10294 EPI\_ISL\_562857  
VIC10295 EPI\_ISL\_1055266  
VIC10296 EPI\_ISL\_562858  
VIC10297 EPI\_ISL\_562691  
VIC10298 EPI\_ISL\_561739  
VIC10299 EPI\_ISL\_562859  
VIC103 EPI\_ISL\_419814  
VIC1030 EPI\_ISL\_430664  
VIC10301 EPI\_ISL\_561827  
VIC10302 EPI\_ISL\_562860  
VIC10303 Rejected  
VIC10304 EPI\_ISL\_562861  
VIC10306 EPI\_ISL\_562862  
VIC10307 EPI\_ISL\_562863  
VIC10308 EPI\_ISL\_562864  
VIC10309 EPI\_ISL\_1055267  
VIC10311 EPI\_ISL\_562865  
VIC10315 EPI\_ISL\_1055268  
VIC10316 EPI\_ISL\_562866  
VIC10318 EPI\_ISL\_562867  
VIC10319 EPI\_ISL\_562868  
VIC1032 EPI\_ISL\_430665  
VIC10320 Rejected  
VIC10321 EPI\_ISL\_562869  
VIC10322 EPI\_ISL\_562870  
VIC10323 EPI\_ISL\_562871  
VIC10324 EPI\_ISL\_562130  
VIC10329 Rejected  
VIC10330 EPI\_ISL\_561979  
VIC10331 EPI\_ISL\_562872  
VIC10333 EPI\_ISL\_562873  
VIC10334 EPI\_ISL\_562874  
VIC10335 EPI\_ISL\_562875  
VIC10336 EPI\_ISL\_562876  
VIC10337 EPI\_ISL\_562877  
VIC10338 EPI\_ISL\_1055269  
VIC10339 EPI\_ISL\_562878  
VIC10342 EPI\_ISL\_562879  
VIC10344 EPI\_ISL\_562881  
VIC10346 EPI\_ISL\_561558  
VIC10347 EPI\_ISL\_562149  
VIC10349 EPI\_ISL\_561703  
VIC10351 EPI\_ISL\_562883  
VIC10353 EPI\_ISL\_562884  
VIC10354 EPI\_ISL\_562885  
VIC10355 EPI\_ISL\_562598  
VIC10356 EPI\_ISL\_562886  
VIC10357 EPI\_ISL\_562887  
VIC10359 EPI\_ISL\_562888  
VIC10361 EPI\_ISL\_562889  
VIC10362 EPI\_ISL\_562890

VIC10363 EPI\_ISL\_562891  
VIC10365 EPI\_ISL\_562692  
VIC10367 EPI\_ISL\_561545  
VIC10368 EPI\_ISL\_561709  
VIC1037 EPI\_ISL\_430533  
VIC10370 Rejected  
VIC10373 EPI\_ISL\_562892  
VIC10375 Rejected  
VIC10377 EPI\_ISL\_562053  
VIC10378 EPI\_ISL\_562893  
VIC10379 Rejected  
VIC1038 EPI\_ISL\_430534  
VIC10380 EPI\_ISL\_562894  
VIC10381 EPI\_ISL\_562895  
VIC10383 EPI\_ISL\_1055270  
VIC10384 EPI\_ISL\_562733  
VIC10386 EPI\_ISL\_561575  
VIC10387 EPI\_ISL\_561980  
VIC10388 EPI\_ISL\_562896  
VIC10389 EPI\_ISL\_562897  
VIC1039 EPI\_ISL\_430535  
VIC10390 EPI\_ISL\_562734  
VIC10391 EPI\_ISL\_561556  
VIC10393 EPI\_ISL\_562735  
VIC10394 EPI\_ISL\_562898  
VIC10396 EPI\_ISL\_562082  
VIC10397 EPI\_ISL\_562899  
VIC10398 EPI\_ISL\_562900  
VIC10399 EPI\_ISL\_562008  
VIC104 EPI\_ISL\_419818  
VIC10401 EPI\_ISL\_562901  
VIC10402 EPI\_ISL\_562902  
VIC10403 EPI\_ISL\_562903  
VIC10404 EPI\_ISL\_1055271  
VIC10405 EPI\_ISL\_561797  
VIC10406 EPI\_ISL\_562904  
VIC10409 EPI\_ISL\_561677  
VIC1041 EPI\_ISL\_430536  
VIC10411 EPI\_ISL\_561753  
VIC10414 EPI\_ISL\_1055272  
VIC10417 EPI\_ISL\_561483  
VIC10418 EPI\_ISL\_561963  
VIC10419 EPI\_ISL\_562906  
VIC1042 EPI\_ISL\_430538  
VIC10420 EPI\_ISL\_561970  
VIC10421 EPI\_ISL\_562907  
VIC10422 EPI\_ISL\_562908  
VIC10425 EPI\_ISL\_562145  
VIC10426 EPI\_ISL\_562909  
VIC1043 EPI\_ISL\_430539  
VIC10437 EPI\_ISL\_562910  
VIC10438 EPI\_ISL\_562911

VIC10439 EPI\_ISL\_562912  
VIC1044 EPI\_ISL\_430540  
VIC10440 EPI\_ISL\_562913  
VIC10443 EPI\_ISL\_562914  
VIC10444 EPI\_ISL\_562915  
VIC10448 EPI\_ISL\_562710  
VIC10449 EPI\_ISL\_561729  
VIC1045 EPI\_ISL\_430546  
VIC10451 EPI\_ISL\_561767  
VIC10454 EPI\_ISL\_562916  
VIC10455 EPI\_ISL\_562917  
VIC10457 EPI\_ISL\_562918  
VIC1046 EPI\_ISL\_430550  
VIC10460 EPI\_ISL\_562711  
VIC10461 EPI\_ISL\_562919  
VIC10463 EPI\_ISL\_562920  
VIC10464 EPI\_ISL\_562921  
VIC10466 EPI\_ISL\_562922  
VIC10467 EPI\_ISL\_562923  
VIC10468 EPI\_ISL\_562924  
VIC1047 EPI\_ISL\_430561  
VIC10471 EPI\_ISL\_562925  
VIC10472 EPI\_ISL\_562926  
VIC10475 EPI\_ISL\_562927  
VIC10477 EPI\_ISL\_562928  
VIC10478 EPI\_ISL\_561636  
VIC10479 EPI\_ISL\_562599  
VIC1048 EPI\_ISL\_430562  
VIC10480 EPI\_ISL\_562600  
VIC10481 EPI\_ISL\_561870  
VIC10482 EPI\_ISL\_562929  
VIC10485 EPI\_ISL\_562930  
VIC10489 EPI\_ISL\_561481  
VIC1049 EPI\_ISL\_430563  
VIC10490 EPI\_ISL\_562931  
VIC10491 EPI\_ISL\_562932  
VIC10496 EPI\_ISL\_562933  
VIC10497 EPI\_ISL\_562934  
VIC10498 EPI\_ISL\_562935  
VIC10499 EPI\_ISL\_562936  
VIC105 EPI\_ISL\_419819  
VIC10501 EPI\_ISL\_562601  
VIC10505 EPI\_ISL\_561747  
VIC10509 EPI\_ISL\_562938  
VIC10511 EPI\_ISL\_562939  
VIC10513 EPI\_ISL\_561927  
VIC10515 EPI\_ISL\_562940  
VIC10516 EPI\_ISL\_562941  
VIC10517 EPI\_ISL\_562942  
VIC10520 EPI\_ISL\_562943  
VIC10521 EPI\_ISL\_562944  
VIC10522 EPI\_ISL\_561988

VIC10523 EPI\_ISL\_562945  
VIC10524 Rejected  
VIC10525 EPI\_ISL\_562946  
VIC10527 EPI\_ISL\_562947  
VIC10528 EPI\_ISL\_561431  
VIC10529 EPI\_ISL\_562112  
VIC10530 EPI\_ISL\_562948  
VIC10531 EPI\_ISL\_561939  
VIC10532 EPI\_ISL\_562949  
VIC10535 EPI\_ISL\_562950  
VIC10536 EPI\_ISL\_562951  
VIC10538 EPI\_ISL\_562952  
VIC10540 EPI\_ISL\_562173  
VIC10541 EPI\_ISL\_561806  
VIC10542 EPI\_ISL\_562953  
VIC10545 EPI\_ISL\_561850  
VIC10548 EPI\_ISL\_562954  
VIC1055 EPI\_ISL\_430667  
VIC10551 EPI\_ISL\_562955  
VIC10554 EPI\_ISL\_562956  
VIC10555 EPI\_ISL\_561712  
VIC10556 EPI\_ISL\_562957  
VIC1056 EPI\_ISL\_430669  
VIC10562 EPI\_ISL\_562958  
VIC10563 EPI\_ISL\_562959  
VIC10564 EPI\_ISL\_562960  
VIC10565 EPI\_ISL\_562961  
VIC10566 EPI\_ISL\_561915  
VIC10567 EPI\_ISL\_561981  
VIC10568 EPI\_ISL\_561693  
VIC10569 EPI\_ISL\_562962  
VIC1057 EPI\_ISL\_430668  
VIC10570 EPI\_ISL\_561770  
VIC10571 EPI\_ISL\_562963  
VIC10573 EPI\_ISL\_561489  
VIC10574 EPI\_ISL\_562964  
VIC10575 EPI\_ISL\_562965  
VIC10576 EPI\_ISL\_562966  
VIC10578 EPI\_ISL\_561490  
VIC10579 EPI\_ISL\_562967  
VIC10580 EPI\_ISL\_562968  
VIC10581 EPI\_ISL\_562969  
VIC10584 EPI\_ISL\_562970  
VIC10585 EPI\_ISL\_562971  
VIC10586 EPI\_ISL\_561460  
VIC10587 EPI\_ISL\_561503  
VIC10589 EPI\_ISL\_562973  
VIC10590 EPI\_ISL\_562974  
VIC10591 EPI\_ISL\_561933  
VIC10593 EPI\_ISL\_562975  
VIC10594 EPI\_ISL\_562976  
VIC10595 EPI\_ISL\_562977



VIC10597 EPI\_ISL\_562978  
VIC10598 EPI\_ISL\_562979  
VIC10599 EPI\_ISL\_562980  
VIC106 EPI\_ISL\_419820  
VIC10600 EPI\_ISL\_562981  
VIC10601 EPI\_ISL\_562982  
VIC10603 EPI\_ISL\_562983  
VIC10604 EPI\_ISL\_562984  
VIC10605 EPI\_ISL\_562985  
VIC10607 EPI\_ISL\_561492  
VIC10608 EPI\_ISL\_562986  
VIC10609 EPI\_ISL\_562987  
VIC1061 EPI\_ISL\_430549  
VIC10610 EPI\_ISL\_562988  
VIC10611 EPI\_ISL\_562989  
VIC10612 EPI\_ISL\_562990  
VIC10613 EPI\_ISL\_562991  
VIC10615 EPI\_ISL\_562992  
VIC10616 EPI\_ISL\_562993  
VIC10618 EPI\_ISL\_562994  
VIC1062 EPI\_ISL\_430578  
VIC10620 EPI\_ISL\_562995  
VIC10621 EPI\_ISL\_562996  
VIC10622 EPI\_ISL\_562997  
VIC10623 EPI\_ISL\_562998  
VIC10624 EPI\_ISL\_562999  
VIC10627 EPI\_ISL\_563000  
VIC10631 EPI\_ISL\_563001  
VIC10632 EPI\_ISL\_562127  
VIC10633 EPI\_ISL\_563002  
VIC10634 EPI\_ISL\_562639  
VIC10636 EPI\_ISL\_563003  
VIC10637 EPI\_ISL\_563004  
VIC10638 EPI\_ISL\_563005  
VIC10639 EPI\_ISL\_563006  
VIC1064 EPI\_ISL\_430672  
VIC10640 EPI\_ISL\_563007  
VIC10641 EPI\_ISL\_563008  
VIC10642 EPI\_ISL\_563009  
VIC10643 EPI\_ISL\_563010  
VIC10644 EPI\_ISL\_563011  
VIC10645 EPI\_ISL\_563012  
VIC10646 EPI\_ISL\_562712  
VIC10647 EPI\_ISL\_563013  
VIC10648 EPI\_ISL\_563014  
VIC10650 EPI\_ISL\_563015  
VIC10651 EPI\_ISL\_563016  
VIC10653 EPI\_ISL\_561993  
VIC10655 EPI\_ISL\_563018  
VIC10657 EPI\_ISL\_562153  
VIC10658 EPI\_ISL\_563019  
VIC10659 EPI\_ISL\_563020

VIC10660 EPI\_ISL\_563021  
VIC10661 EPI\_ISL\_563022  
VIC10662 EPI\_ISL\_563023  
VIC10663 EPI\_ISL\_563024  
VIC10665 EPI\_ISL\_563025  
VIC10666 EPI\_ISL\_561411  
VIC10668 EPI\_ISL\_563026  
VIC1067 EPI\_ISL\_430670  
VIC10671 EPI\_ISL\_563027  
VIC10672 EPI\_ISL\_561694  
VIC10673 EPI\_ISL\_561760  
VIC10675 EPI\_ISL\_561828  
VIC10676 EPI\_ISL\_563028  
VIC10677 EPI\_ISL\_562713  
VIC1068 EPI\_ISL\_430671  
VIC10680 EPI\_ISL\_563029  
VIC10681 EPI\_ISL\_563030  
VIC10682 EPI\_ISL\_563031  
VIC10683 EPI\_ISL\_561726  
VIC10689 EPI\_ISL\_563032  
VIC10690 EPI\_ISL\_563033  
VIC10691 EPI\_ISL\_563034  
VIC10692 EPI\_ISL\_562591  
VIC10693 EPI\_ISL\_562714  
VIC10694 EPI\_ISL\_563035  
VIC10695 EPI\_ISL\_563036  
VIC10696 EPI\_ISL\_563037  
VIC10698 EPI\_ISL\_563038  
VIC10699 EPI\_ISL\_562107  
VIC107 EPI\_ISL\_419720  
VIC10700 EPI\_ISL\_563039  
VIC10701 EPI\_ISL\_563040  
VIC10702 EPI\_ISL\_563041  
VIC10703 EPI\_ISL\_563042  
VIC10704 EPI\_ISL\_563043  
VIC10705 EPI\_ISL\_563044  
VIC10706 EPI\_ISL\_563045  
VIC10707 EPI\_ISL\_561872  
VIC10708 EPI\_ISL\_563046  
VIC10709 EPI\_ISL\_563047  
VIC1071 EPI\_ISL\_430581  
VIC10710 EPI\_ISL\_561745  
VIC10711 EPI\_ISL\_563048  
VIC10712 EPI\_ISL\_563049  
VIC10713 EPI\_ISL\_561998  
VIC10716 EPI\_ISL\_563050  
VIC10718 EPI\_ISL\_563051  
VIC10719 EPI\_ISL\_563052  
VIC10720 EPI\_ISL\_563053  
VIC10721 EPI\_ISL\_563054  
VIC10722 EPI\_ISL\_1055273  
VIC10723 EPI\_ISL\_563055

VIC10724 EPI\_ISL\_561802  
VIC10725 EPI\_ISL\_563056  
VIC10726 EPI\_ISL\_563057  
VIC10727 EPI\_ISL\_563058  
VIC10731 EPI\_ISL\_563059  
VIC10732 EPI\_ISL\_561664  
VIC10733 EPI\_ISL\_561604  
VIC10736 EPI\_ISL\_563060  
VIC10737 EPI\_ISL\_563061  
VIC10738 EPI\_ISL\_563062  
VIC10739 EPI\_ISL\_562059  
VIC10740 EPI\_ISL\_563063  
VIC10741 EPI\_ISL\_561854  
VIC10742 EPI\_ISL\_563064  
VIC10743 EPI\_ISL\_563065  
VIC10745 EPI\_ISL\_562154  
VIC10746 EPI\_ISL\_563066  
VIC10747 EPI\_ISL\_563067  
VIC10748 EPI\_ISL\_561650  
VIC10749 EPI\_ISL\_562087  
VIC10750 EPI\_ISL\_563068  
VIC10751 EPI\_ISL\_563069  
VIC10752 EPI\_ISL\_563070  
VIC10753 EPI\_ISL\_563071  
VIC10754 EPI\_ISL\_563072  
VIC10755 Rejected  
VIC10756 EPI\_ISL\_563073  
VIC10757 EPI\_ISL\_563074  
VIC10758 EPI\_ISL\_563075  
VIC10759 EPI\_ISL\_563076  
VIC1076 EPI\_ISL\_430566  
VIC10760 EPI\_ISL\_563077  
VIC10761 EPI\_ISL\_563078  
VIC10762 EPI\_ISL\_563079  
VIC10764 EPI\_ISL\_561713  
VIC10765 EPI\_ISL\_561488  
VIC10769 EPI\_ISL\_561660  
VIC10770 EPI\_ISL\_563080  
VIC10771 EPI\_ISL\_563081  
VIC10772 EPI\_ISL\_561548  
VIC10773 EPI\_ISL\_563082  
VIC10774 EPI\_ISL\_563083  
VIC10775 EPI\_ISL\_563084  
VIC10776 EPI\_ISL\_562715  
VIC10777 EPI\_ISL\_563085  
VIC10778 EPI\_ISL\_562602  
VIC10779 EPI\_ISL\_562120  
VIC10781 EPI\_ISL\_563086  
VIC10782 EPI\_ISL\_563087  
VIC10784 EPI\_ISL\_562062  
VIC10785 EPI\_ISL\_561916  
VIC10786 EPI\_ISL\_563088

VIC10787 EPI\_ISL\_563089  
VIC10788 EPI\_ISL\_563090  
VIC10789 EPI\_ISL\_562592  
VIC1079 EPI\_ISL\_430565  
VIC10790 EPI\_ISL\_561917  
VIC10791 EPI\_ISL\_563091  
VIC10792 EPI\_ISL\_563092  
VIC10794 EPI\_ISL\_563093  
VIC10795 EPI\_ISL\_563094  
VIC10796 EPI\_ISL\_563095  
VIC10797 Rejected  
VIC10798 EPI\_ISL\_563096  
VIC108 EPI\_ISL\_419714  
VIC1080 EPI\_ISL\_430579  
VIC10800 EPI\_ISL\_563097  
VIC10801 EPI\_ISL\_563098  
VIC10803 EPI\_ISL\_1055274  
VIC10804 EPI\_ISL\_561573  
VIC10806 EPI\_ISL\_563099  
VIC10809 EPI\_ISL\_563101  
VIC1081 EPI\_ISL\_430580  
VIC10811 EPI\_ISL\_563102  
VIC10812 EPI\_ISL\_563103  
VIC10813 EPI\_ISL\_563104  
VIC10814 EPI\_ISL\_563105  
VIC10817 EPI\_ISL\_563106  
VIC10818 EPI\_ISL\_563107  
VIC10819 EPI\_ISL\_563108  
VIC10820 EPI\_ISL\_563109  
VIC10821 EPI\_ISL\_563110  
VIC10822 EPI\_ISL\_563111  
VIC10825 EPI\_ISL\_563112  
VIC10826 Rejected  
VIC10827 EPI\_ISL\_561890  
VIC10828 EPI\_ISL\_563113  
VIC10829 EPI\_ISL\_563114  
VIC10830 EPI\_ISL\_563115  
VIC10831 EPI\_ISL\_563116  
VIC10832 EPI\_ISL\_563117  
VIC10833 EPI\_ISL\_563118  
VIC10835 EPI\_ISL\_563119  
VIC10836 EPI\_ISL\_563120  
VIC10838 EPI\_ISL\_563121  
VIC10840 EPI\_ISL\_563122  
VIC10841 EPI\_ISL\_563123  
VIC10842 EPI\_ISL\_561448  
VIC10843 Rejected  
VIC10847 EPI\_ISL\_563124  
VIC10848 EPI\_ISL\_563125  
VIC10849 EPI\_ISL\_563126  
VIC1085 EPI\_ISL\_430587  
VIC10851 EPI\_ISL\_562716

VIC10856 EPI\_ISL\_563127  
VIC10857 EPI\_ISL\_563128  
VIC10858 EPI\_ISL\_563129  
VIC1086 EPI\_ISL\_430597  
VIC10863 EPI\_ISL\_563130  
VIC10864 EPI\_ISL\_1055275  
VIC10865 Rejected  
VIC10866 EPI\_ISL\_563131  
VIC10867 EPI\_ISL\_563132  
VIC10869 EPI\_ISL\_563133  
VIC1087 EPI\_ISL\_430574  
VIC10870 EPI\_ISL\_1055276  
VIC10871 EPI\_ISL\_563134  
VIC10874 EPI\_ISL\_563135  
VIC10881 EPI\_ISL\_1055277  
VIC10883 EPI\_ISL\_563137  
VIC10885 Rejected  
VIC10886 EPI\_ISL\_563138  
VIC10887 Rejected  
VIC10888 EPI\_ISL\_563139  
VIC10889 EPI\_ISL\_563140  
VIC1089 EPI\_ISL\_430673  
VIC10890 EPI\_ISL\_563141  
VIC10891 EPI\_ISL\_563142  
VIC10892 EPI\_ISL\_1055278  
VIC10894 EPI\_ISL\_562640  
VIC10895 EPI\_ISL\_562593  
VIC10897 EPI\_ISL\_563144  
VIC109 EPI\_ISL\_419718  
VIC10900 EPI\_ISL\_563145  
VIC10903 EPI\_ISL\_563146  
VIC10904 EPI\_ISL\_563147  
VIC10905 EPI\_ISL\_563148  
VIC10906 EPI\_ISL\_563149  
VIC10910 EPI\_ISL\_563150  
VIC10912 EPI\_ISL\_561527  
VIC10913 EPI\_ISL\_563151  
VIC10916 EPI\_ISL\_563152  
VIC10917 EPI\_ISL\_563153  
VIC10920 Rejected  
VIC10922 EPI\_ISL\_562603  
VIC10923 EPI\_ISL\_563154  
VIC10925 EPI\_ISL\_563155  
VIC10926 EPI\_ISL\_563156  
VIC10927 EPI\_ISL\_562604  
VIC10928 EPI\_ISL\_563157  
VIC10929 EPI\_ISL\_562693  
VIC10930 EPI\_ISL\_562605  
VIC10931 EPI\_ISL\_563158  
VIC10932 EPI\_ISL\_563159  
VIC10933 EPI\_ISL\_1055279  
VIC10936 EPI\_ISL\_563160

VIC10938 EPI\_ISL\_562694  
VIC10940 EPI\_ISL\_1055280  
VIC10942 EPI\_ISL\_561750  
VIC10943 EPI\_ISL\_562700  
VIC10944 EPI\_ISL\_563161  
VIC10947 EPI\_ISL\_563162  
VIC10948 EPI\_ISL\_563163  
VIC10949 EPI\_ISL\_561494  
VIC10950 EPI\_ISL\_1055281  
VIC10951 EPI\_ISL\_1055282  
VIC10953 EPI\_ISL\_561928  
VIC10954 EPI\_ISL\_563164  
VIC10955 EPI\_ISL\_563165  
VIC10956 EPI\_ISL\_563166  
VIC10957 EPI\_ISL\_563167  
VIC10958 EPI\_ISL\_563168  
VIC10959 EPI\_ISL\_563169  
VIC10961 EPI\_ISL\_563170  
VIC10963 EPI\_ISL\_563171  
VIC10965 EPI\_ISL\_563172  
VIC10967 EPI\_ISL\_563173  
VIC10968 EPI\_ISL\_563174  
VIC10969 EPI\_ISL\_563175  
VIC10970 EPI\_ISL\_563176  
VIC10973 EPI\_ISL\_563177  
VIC10975 Rejected  
VIC10976 EPI\_ISL\_561620  
VIC10977 EPI\_ISL\_1055283  
VIC10979 EPI\_ISL\_563178  
VIC1098 EPI\_ISL\_430589  
VIC10980 EPI\_ISL\_563179  
VIC10981 EPI\_ISL\_563180  
VIC10982 EPI\_ISL\_563181  
VIC10983 EPI\_ISL\_563182  
VIC10985 EPI\_ISL\_563183  
VIC10986 EPI\_ISL\_563184  
VIC10988 EPI\_ISL\_562717  
VIC10989 EPI\_ISL\_563185  
VIC10991 EPI\_ISL\_563186  
VIC10992 EPI\_ISL\_563187  
VIC10993 EPI\_ISL\_563188  
VIC10995 EPI\_ISL\_561549  
VIC10996 EPI\_ISL\_563189  
VIC10998 EPI\_ISL\_563190  
VIC10999 EPI\_ISL\_563191  
VIC11 EPI\_ISL\_416517  
VIC110 EPI\_ISL\_419716  
VIC11000 EPI\_ISL\_563192  
VIC11001 EPI\_ISL\_562606  
VIC11002 EPI\_ISL\_561572  
VIC11003 EPI\_ISL\_562004  
VIC11004 EPI\_ISL\_563193

VIC11005 EPI\_ISL\_563194  
VIC11006 EPI\_ISL\_561831  
VIC11007 EPI\_ISL\_563195  
VIC11010 EPI\_ISL\_562718  
VIC11011 EPI\_ISL\_563196  
VIC11012 EPI\_ISL\_563197  
VIC11013 EPI\_ISL\_563198  
VIC11014 EPI\_ISL\_563199  
VIC11016 EPI\_ISL\_562719  
VIC11017 EPI\_ISL\_563200  
VIC11018 EPI\_ISL\_563201  
VIC11019 EPI\_ISL\_563202  
VIC11021 EPI\_ISL\_563204  
VIC11023 EPI\_ISL\_563206  
VIC11024 EPI\_ISL\_563207  
VIC11025 EPI\_ISL\_563208  
VIC11026 EPI\_ISL\_561951  
VIC11027 EPI\_ISL\_562607  
VIC11028 EPI\_ISL\_563209  
VIC1103 EPI\_ISL\_430584  
VIC11030 EPI\_ISL\_563210  
VIC11032 EPI\_ISL\_563211  
VIC11033 EPI\_ISL\_563212  
VIC11034 EPI\_ISL\_563213  
VIC11038 EPI\_ISL\_561768  
VIC11039 EPI\_ISL\_562608  
VIC1104 EPI\_ISL\_430585  
VIC11040 EPI\_ISL\_563214  
VIC11041 EPI\_ISL\_563215  
VIC11042 EPI\_ISL\_563216  
VIC11043 EPI\_ISL\_563217  
VIC11044 EPI\_ISL\_563218  
VIC11045 EPI\_ISL\_563219  
VIC11046 EPI\_ISL\_562102  
VIC11047 EPI\_ISL\_563220  
VIC11050 EPI\_ISL\_563222  
VIC11051 EPI\_ISL\_563223  
VIC11052 EPI\_ISL\_563224  
VIC11053 EPI\_ISL\_561589  
VIC11054 EPI\_ISL\_563225  
VIC11055 EPI\_ISL\_561580  
VIC11056 EPI\_ISL\_563226  
VIC1106 EPI\_ISL\_430588  
VIC11060 EPI\_ISL\_563227  
VIC11061 EPI\_ISL\_563228  
VIC11062 EPI\_ISL\_562609  
VIC11066 EPI\_ISL\_561953  
VIC11067 EPI\_ISL\_563229  
VIC11068 EPI\_ISL\_563230  
VIC11069 EPI\_ISL\_562079  
VIC1107 EPI\_ISL\_430590  
VIC11071 EPI\_ISL\_563231

VIC11072 EPI\_ISL\_561909  
VIC11073 EPI\_ISL\_563232  
VIC11074 EPI\_ISL\_563233  
VIC11075 EPI\_ISL\_563234  
VIC11076 EPI\_ISL\_563235  
VIC11077 EPI\_ISL\_563236  
VIC11078 EPI\_ISL\_562736  
VIC11081 EPI\_ISL\_563237  
VIC11082 EPI\_ISL\_563238  
VIC11083 EPI\_ISL\_563239  
VIC11084 EPI\_ISL\_563240  
VIC11085 EPI\_ISL\_563241  
VIC11086 EPI\_ISL\_563242  
VIC11088 EPI\_ISL\_563243  
VIC11089 EPI\_ISL\_563244  
VIC11090 EPI\_ISL\_561918  
VIC11091 EPI\_ISL\_1055284  
VIC11092 EPI\_ISL\_562720  
VIC11093 EPI\_ISL\_562026  
VIC11095 EPI\_ISL\_562610  
VIC11097 EPI\_ISL\_562014  
VIC11099 EPI\_ISL\_563245  
VIC111 EPI\_ISL\_419715  
VIC1110 EPI\_ISL\_430569  
VIC11100 EPI\_ISL\_563246  
VIC11101 EPI\_ISL\_563247  
VIC11102 EPI\_ISL\_563248  
VIC11103 EPI\_ISL\_563249  
VIC11104 EPI\_ISL\_563250  
VIC11106 EPI\_ISL\_563251  
VIC11107 EPI\_ISL\_561871  
VIC11109 EPI\_ISL\_563252  
VIC1111 EPI\_ISL\_430570  
VIC11112 EPI\_ISL\_563253  
VIC11113 Rejected  
VIC11114 EPI\_ISL\_563254  
VIC11115 EPI\_ISL\_563255  
VIC11118 EPI\_ISL\_562695  
VIC11119 EPI\_ISL\_563256  
VIC1112 EPI\_ISL\_430573  
VIC11120 EPI\_ISL\_563257  
VIC11122 EPI\_ISL\_563258  
VIC11124 EPI\_ISL\_562641  
VIC11127 EPI\_ISL\_563259  
VIC11128 EPI\_ISL\_561424  
VIC11129 EPI\_ISL\_563260  
VIC11130 EPI\_ISL\_563261  
VIC11131 EPI\_ISL\_1055285  
VIC11132 EPI\_ISL\_563262  
VIC11134 EPI\_ISL\_563263  
VIC11135 EPI\_ISL\_563264  
VIC11136 EPI\_ISL\_563265



VIC11140 EPI\_ISL\_563266  
VIC11141 EPI\_ISL\_563267  
VIC11142 EPI\_ISL\_561546  
VIC11143 EPI\_ISL\_563268  
VIC11145 EPI\_ISL\_561478  
VIC11146 EPI\_ISL\_563269  
VIC11147 EPI\_ISL\_563270  
VIC11148 EPI\_ISL\_563271  
VIC1115 EPI\_ISL\_430577  
VIC11152 EPI\_ISL\_563272  
VIC11153 EPI\_ISL\_563273  
VIC11154 EPI\_ISL\_561609  
VIC11155 EPI\_ISL\_563274  
VIC11156 EPI\_ISL\_563275  
VIC11157 EPI\_ISL\_562150  
VIC11158 EPI\_ISL\_563276  
VIC11161 EPI\_ISL\_561982  
VIC11162 EPI\_ISL\_563277  
VIC11163 EPI\_ISL\_563278  
VIC11164 Rejected  
VIC11165 EPI\_ISL\_563279  
VIC11167 EPI\_ISL\_562611  
VIC11168 EPI\_ISL\_563280  
VIC11169 EPI\_ISL\_563281  
VIC11170 EPI\_ISL\_562721  
VIC11171 Rejected  
VIC11174 EPI\_ISL\_563282  
VIC11175 EPI\_ISL\_563283  
VIC11176 EPI\_ISL\_563284  
VIC11177 EPI\_ISL\_561658  
VIC11178 EPI\_ISL\_563285  
VIC11181 EPI\_ISL\_563286  
VIC11183 EPI\_ISL\_563287  
VIC11186 EPI\_ISL\_563288  
VIC11187 Rejected  
VIC11188 EPI\_ISL\_563289  
VIC1119 EPI\_ISL\_430567  
VIC11192 EPI\_ISL\_561999  
VIC11193 EPI\_ISL\_563291  
VIC11195 EPI\_ISL\_563292  
VIC11197 EPI\_ISL\_563293  
VIC11198 EPI\_ISL\_563294  
VIC112 EPI\_ISL\_419821  
VIC11202 EPI\_ISL\_563295  
VIC11203 EPI\_ISL\_563296  
VIC11207 EPI\_ISL\_563297  
VIC11208 EPI\_ISL\_562701  
VIC11209 EPI\_ISL\_561839  
VIC11211 EPI\_ISL\_563298  
VIC11214 EPI\_ISL\_563299  
VIC11215 EPI\_ISL\_563300  
VIC11217 EPI\_ISL\_563301

VIC11218 EPI\_ISL\_562737  
VIC11219 EPI\_ISL\_562161  
VIC11220 EPI\_ISL\_563302  
VIC11221 EPI\_ISL\_561593  
VIC11222 EPI\_ISL\_562121  
VIC11223 EPI\_ISL\_563303  
VIC11224 EPI\_ISL\_563304  
VIC11228 EPI\_ISL\_563305  
VIC11230 EPI\_ISL\_563306  
VIC11240 EPI\_ISL\_563307  
VIC11241 EPI\_ISL\_563308  
VIC11243 EPI\_ISL\_563309  
VIC11244 EPI\_ISL\_1055286  
VIC11247 EPI\_ISL\_561887  
VIC11250 EPI\_ISL\_561829  
VIC11251 EPI\_ISL\_562009  
VIC11254 EPI\_ISL\_563310  
VIC11257 EPI\_ISL\_563311  
VIC11259 EPI\_ISL\_561616  
VIC11264 EPI\_ISL\_561733  
VIC11270 EPI\_ISL\_1055287  
VIC11272 EPI\_ISL\_1055288  
VIC11274 EPI\_ISL\_1055289  
VIC11275 EPI\_ISL\_1055290  
VIC11276 EPI\_ISL\_1055291  
VIC11277 EPI\_ISL\_1055292  
VIC11278 EPI\_ISL\_1055293  
VIC11279 EPI\_ISL\_1055294  
VIC11280 EPI\_ISL\_1055295  
VIC11282 EPI\_ISL\_562044  
VIC11283 EPI\_ISL\_563312  
VIC11284 EPI\_ISL\_563313  
VIC11285 EPI\_ISL\_563314  
VIC11286 EPI\_ISL\_563315  
VIC11287 EPI\_ISL\_563316  
VIC11288 EPI\_ISL\_563317  
VIC11290 EPI\_ISL\_563318  
VIC11291 EPI\_ISL\_563319  
VIC11292 EPI\_ISL\_1055296  
VIC11293 EPI\_ISL\_561817  
VIC11294 EPI\_ISL\_563320  
VIC11295 EPI\_ISL\_563321  
VIC11296 EPI\_ISL\_562135  
VIC11297 EPI\_ISL\_561832  
VIC11298 EPI\_ISL\_561813  
VIC113 EPI\_ISL\_419822  
VIC11301 EPI\_ISL\_563322  
VIC11302 EPI\_ISL\_562088  
VIC11304 EPI\_ISL\_563323  
VIC11305 EPI\_ISL\_563324  
VIC11306 EPI\_ISL\_561706  
VIC11309 EPI\_ISL\_1055297

VIC1131 EPI\_ISL\_430592  
VIC11312 EPI\_ISL\_563325  
VIC11315 EPI\_ISL\_561563  
VIC11316 EPI\_ISL\_563326  
VIC11317 EPI\_ISL\_563327  
VIC1132 EPI\_ISL\_430593  
VIC11320 EPI\_ISL\_563328  
VIC11323 EPI\_ISL\_563329  
VIC11329 EPI\_ISL\_563331  
VIC1133 EPI\_ISL\_430596  
VIC11334 EPI\_ISL\_561807  
VIC11335 EPI\_ISL\_563332  
VIC11336 EPI\_ISL\_563333  
VIC11337 EPI\_ISL\_563334  
VIC11338 EPI\_ISL\_563335  
VIC11339 EPI\_ISL\_563336  
VIC1134 EPI\_ISL\_430600  
VIC11340 EPI\_ISL\_563337  
VIC11342 EPI\_ISL\_563338  
VIC11343 EPI\_ISL\_563339  
VIC11344 EPI\_ISL\_563340  
VIC11346 EPI\_ISL\_562642  
VIC11349 EPI\_ISL\_563341  
VIC1135 EPI\_ISL\_430601  
VIC11350 EPI\_ISL\_561443  
VIC11352 EPI\_ISL\_563342  
VIC11353 EPI\_ISL\_563343  
VIC11354 EPI\_ISL\_561934  
VIC11357 EPI\_ISL\_563344  
VIC11358 EPI\_ISL\_562108  
VIC1136 EPI\_ISL\_430606  
VIC11360 EPI\_ISL\_561432  
VIC11362 EPI\_ISL\_561534  
VIC11364 EPI\_ISL\_563345  
VIC11365 EPI\_ISL\_561539  
VIC11366 EPI\_ISL\_561511  
VIC11367 EPI\_ISL\_561631  
VIC11369 EPI\_ISL\_563346  
VIC1137 EPI\_ISL\_430607  
VIC11371 EPI\_ISL\_563347  
VIC11376 EPI\_ISL\_562117  
VIC11377 EPI\_ISL\_561641  
VIC11378 EPI\_ISL\_563348  
VIC11379 EPI\_ISL\_563349  
VIC11381 EPI\_ISL\_561756  
VIC11387 EPI\_ISL\_563350  
VIC11388 EPI\_ISL\_563351  
VIC1139 EPI\_ISL\_430610  
VIC11391 EPI\_ISL\_563352  
VIC11392 EPI\_ISL\_563353  
VIC11395 EPI\_ISL\_563354  
VIC11396 EPI\_ISL\_563355

VIC11397 EPI\_ISL\_563356  
VIC11398 EPI\_ISL\_561814  
VIC11399 EPI\_ISL\_563357  
VIC114 EPI\_ISL\_419725  
VIC1140 EPI\_ISL\_430611  
VIC11400 EPI\_ISL\_562722  
VIC11401 EPI\_ISL\_561971  
VIC11402 EPI\_ISL\_563358  
VIC11403 EPI\_ISL\_563359  
VIC11405 EPI\_ISL\_561553  
VIC11406 EPI\_ISL\_561639  
VIC11407 EPI\_ISL\_561762  
VIC11408 EPI\_ISL\_562738  
VIC11409 EPI\_ISL\_561751  
VIC1141 EPI\_ISL\_430612  
VIC11410 EPI\_ISL\_563360  
VIC11412 EPI\_ISL\_563361  
VIC11413 EPI\_ISL\_563362  
VIC11414 EPI\_ISL\_563363  
VIC11415 EPI\_ISL\_563364  
VIC11417 EPI\_ISL\_561566  
VIC11418 EPI\_ISL\_563365  
VIC11419 EPI\_ISL\_562103  
VIC1142 EPI\_ISL\_430613  
VIC11420 EPI\_ISL\_563366  
VIC11421 EPI\_ISL\_563367  
VIC11423 EPI\_ISL\_563368  
VIC11424 EPI\_ISL\_561600  
VIC11425 EPI\_ISL\_562612  
VIC1143 EPI\_ISL\_430614  
VIC11431 EPI\_ISL\_563369  
VIC11432 EPI\_ISL\_561701  
VIC11433 EPI\_ISL\_561555  
VIC11434 EPI\_ISL\_563370  
VIC11435 EPI\_ISL\_562613  
VIC11436 EPI\_ISL\_562643  
VIC11437 EPI\_ISL\_563371  
VIC11438 EPI\_ISL\_562644  
VIC11439 EPI\_ISL\_562614  
VIC11441 EPI\_ISL\_563372  
VIC11442 EPI\_ISL\_563373  
VIC11445 EPI\_ISL\_563374  
VIC11448 EPI\_ISL\_561521  
VIC11449 EPI\_ISL\_563375  
VIC11450 EPI\_ISL\_563376  
VIC11451 EPI\_ISL\_563377  
VIC11454 EPI\_ISL\_563378  
VIC11455 EPI\_ISL\_563379  
VIC11458 EPI\_ISL\_563380  
VIC11459 EPI\_ISL\_563381  
VIC11460 EPI\_ISL\_561500  
VIC11461 EPI\_ISL\_563382

VIC11465 EPI\_ISL\_563384  
VIC11467 EPI\_ISL\_563385  
VIC11468 Rejected  
VIC11469 EPI\_ISL\_563386  
VIC11470 EPI\_ISL\_563387  
VIC11471 EPI\_ISL\_562089  
VIC11472 EPI\_ISL\_563388  
VIC11473 EPI\_ISL\_563389  
VIC11475 EPI\_ISL\_563390  
VIC11476 EPI\_ISL\_563391  
VIC11481 EPI\_ISL\_563392  
VIC11483 EPI\_ISL\_1055298  
VIC11484 EPI\_ISL\_561820  
VIC11485 EPI\_ISL\_561663  
VIC11487 EPI\_ISL\_563393  
VIC11490 EPI\_ISL\_563394  
VIC11491 EPI\_ISL\_563395  
VIC11492 EPI\_ISL\_562723  
VIC11494 EPI\_ISL\_562739  
VIC11495 EPI\_ISL\_563396  
VIC11496 EPI\_ISL\_563397  
VIC11498 EPI\_ISL\_561695  
VIC115 EPI\_ISL\_419717  
VIC11501 EPI\_ISL\_563398  
VIC11502 EPI\_ISL\_563399  
VIC11503 EPI\_ISL\_562084  
VIC11504 EPI\_ISL\_563400  
VIC11505 EPI\_ISL\_563401  
VIC11508 EPI\_ISL\_1055299  
VIC11511 EPI\_ISL\_563402  
VIC11516 EPI\_ISL\_563403  
VIC11517 EPI\_ISL\_561833  
VIC11527 EPI\_ISL\_561637  
VIC11532 EPI\_ISL\_561696  
VIC11535 EPI\_ISL\_563404  
VIC11536 EPI\_ISL\_563405  
VIC11537 EPI\_ISL\_563406  
VIC11539 EPI\_ISL\_561954  
VIC11540 EPI\_ISL\_562702  
VIC11548 EPI\_ISL\_563409  
VIC11549 EPI\_ISL\_563410  
VIC11550 EPI\_ISL\_563411  
VIC11551 EPI\_ISL\_563412  
VIC11552 EPI\_ISL\_563413  
VIC11553 EPI\_ISL\_562163  
VIC11554 EPI\_ISL\_563414  
VIC11556 EPI\_ISL\_561656  
VIC11557 EPI\_ISL\_561840  
VIC11560 EPI\_ISL\_563415  
VIC11561 EPI\_ISL\_561468  
VIC11562 EPI\_ISL\_562645  
VIC11563 EPI\_ISL\_562646

VIC11565 EPI\_ISL\_563416  
VIC1157 EPI\_ISL\_430598  
VIC11571 EPI\_ISL\_561651  
VIC11573 EPI\_ISL\_563417  
VIC11575 EPI\_ISL\_563418  
VIC11576 Rejected  
VIC11577 EPI\_ISL\_561994  
VIC1158 EPI\_ISL\_430602  
VIC11580 Rejected  
VIC11581 EPI\_ISL\_563419  
VIC11582 EPI\_ISL\_563420  
VIC11583 EPI\_ISL\_563421  
VIC11585 EPI\_ISL\_563422  
VIC11587 EPI\_ISL\_561541  
VIC1159 EPI\_ISL\_430604  
VIC11590 EPI\_ISL\_563423  
VIC11593 EPI\_ISL\_640502  
VIC11595 EPI\_ISL\_563424  
VIC11596 EPI\_ISL\_563425  
VIC11597 EPI\_ISL\_563426  
VIC11598 EPI\_ISL\_563427  
VIC11599 EPI\_ISL\_640835  
VIC116 EPI\_ISL\_419721  
VIC1160 EPI\_ISL\_430605  
VIC11600 EPI\_ISL\_563428  
VIC11602 EPI\_ISL\_563429  
VIC11603 EPI\_ISL\_562073  
VIC11604 EPI\_ISL\_561506  
VIC11606 EPI\_ISL\_591826  
VIC11607 EPI\_ISL\_563430  
VIC11609 EPI\_ISL\_640873  
VIC1161 EPI\_ISL\_430615  
VIC11610 EPI\_ISL\_591827  
VIC11611 EPI\_ISL\_563431  
VIC11612 EPI\_ISL\_640991  
VIC11613 EPI\_ISL\_563432  
VIC11614 EPI\_ISL\_563433  
VIC11615 EPI\_ISL\_563434  
VIC11616 EPI\_ISL\_640680  
VIC11617 EPI\_ISL\_563435  
VIC11619 EPI\_ISL\_641060  
VIC1162 EPI\_ISL\_430616  
VIC11620 EPI\_ISL\_561821  
VIC11622 EPI\_ISL\_640890  
VIC11623 EPI\_ISL\_562000  
VIC11624 EPI\_ISL\_640617  
VIC11625 EPI\_ISL\_563436  
VIC11626 EPI\_ISL\_641264  
VIC11627 EPI\_ISL\_563437  
VIC11628 EPI\_ISL\_563438  
VIC11630 EPI\_ISL\_591828  
VIC11631 EPI\_ISL\_640667

VIC11634 EPI\_ISL\_563439  
VIC11636 EPI\_ISL\_563440  
VIC11637 EPI\_ISL\_641003  
VIC11638 EPI\_ISL\_563441  
VIC11639 EPI\_ISL\_563442  
VIC1164 EPI\_ISL\_430624  
VIC11640 EPI\_ISL\_563443  
VIC11641 EPI\_ISL\_563444  
VIC11643 EPI\_ISL\_641181  
VIC11644 EPI\_ISL\_561899  
VIC11645 EPI\_ISL\_641029  
VIC11646 EPI\_ISL\_561947  
VIC11648 EPI\_ISL\_563445  
VIC11649 EPI\_ISL\_563446  
VIC11650 EPI\_ISL\_561568  
VIC11651 EPI\_ISL\_563447  
VIC11652 EPI\_ISL\_561948  
VIC11653 EPI\_ISL\_591829  
VIC11654 EPI\_ISL\_563448  
VIC11658 EPI\_ISL\_563449  
VIC11660 EPI\_ISL\_591830  
VIC11661 EPI\_ISL\_640347  
VIC11662 EPI\_ISL\_563450  
VIC11664 EPI\_ISL\_591831  
VIC11665 EPI\_ISL\_563451  
VIC11667 EPI\_ISL\_563452  
VIC11668 EPI\_ISL\_591832  
VIC11669 EPI\_ISL\_640639  
VIC11670 EPI\_ISL\_563453  
VIC11671 EPI\_ISL\_641161  
VIC11672 EPI\_ISL\_563454  
VIC11673 EPI\_ISL\_591605  
VIC11674 EPI\_ISL\_561528  
VIC11676 EPI\_ISL\_640538  
VIC11677 EPI\_ISL\_563455  
VIC11678 EPI\_ISL\_563456  
VIC11679 EPI\_ISL\_591833  
VIC11680 EPI\_ISL\_563457  
VIC11681 EPI\_ISL\_563458  
VIC11682 EPI\_ISL\_563459  
VIC11683 EPI\_ISL\_563460  
VIC11684 EPI\_ISL\_641294  
VIC11687 EPI\_ISL\_591834  
VIC11689 EPI\_ISL\_640725  
VIC11690 EPI\_ISL\_563461  
VIC11692 EPI\_ISL\_591835  
VIC11693 EPI\_ISL\_563462  
VIC11695 EPI\_ISL\_591836  
VIC11696 EPI\_ISL\_591837  
VIC11697 EPI\_ISL\_563463  
VIC11699 Rejected  
VIC117 EPI\_ISL\_419727

VIC11700 EPI\_ISL\_563464  
VIC11701 EPI\_ISL\_640338  
VIC11703 EPI\_ISL\_640867  
VIC11705 EPI\_ISL\_563465  
VIC11706 EPI\_ISL\_562118  
VIC11707 EPI\_ISL\_563466  
VIC11708 EPI\_ISL\_563467  
VIC11710 EPI\_ISL\_563468  
VIC11711 EPI\_ISL\_563469  
VIC11712 EPI\_ISL\_640869  
VIC11713 EPI\_ISL\_591838  
VIC11714 EPI\_ISL\_591839  
VIC11716 EPI\_ISL\_640383  
VIC11717 EPI\_ISL\_640847  
VIC11720 EPI\_ISL\_561889  
VIC11721 EPI\_ISL\_563470  
VIC11722 EPI\_ISL\_563471  
VIC11723 EPI\_ISL\_640344  
VIC11727 EPI\_ISL\_591840  
VIC11728 EPI\_ISL\_563473  
VIC11729 EPI\_ISL\_641107  
VIC11730 EPI\_ISL\_641196  
VIC11731 EPI\_ISL\_591663  
VIC11732 EPI\_ISL\_641002  
VIC11733 EPI\_ISL\_563474  
VIC11734 EPI\_ISL\_563475  
VIC11735 EPI\_ISL\_563476  
VIC11736 EPI\_ISL\_641080  
VIC11737 EPI\_ISL\_591841  
VIC11738 EPI\_ISL\_591661  
VIC11739 EPI\_ISL\_563477  
VIC1174 EPI\_ISL\_430623  
VIC11740 EPI\_ISL\_563478  
VIC11741 EPI\_ISL\_563479  
VIC11742 EPI\_ISL\_562020  
VIC11743 EPI\_ISL\_563480  
VIC11744 EPI\_ISL\_591690  
VIC11745 EPI\_ISL\_563481  
VIC11746 EPI\_ISL\_561873  
VIC11747 EPI\_ISL\_563482  
VIC11749 EPI\_ISL\_563483  
VIC11750 EPI\_ISL\_640843  
VIC11751 EPI\_ISL\_591843  
VIC11753 EPI\_ISL\_563484  
VIC11754 EPI\_ISL\_563485  
VIC11755 EPI\_ISL\_591844  
VIC11756 EPI\_ISL\_563486  
VIC11757 EPI\_ISL\_563487  
VIC11758 EPI\_ISL\_591575  
VIC11759 EPI\_ISL\_563488  
VIC11760 EPI\_ISL\_563489  
VIC11761 EPI\_ISL\_563490



VIC11762 EPI\_ISL\_563491  
VIC11763 EPI\_ISL\_563492  
VIC11765 EPI\_ISL\_591695  
VIC11766 EPI\_ISL\_591845  
VIC11767 EPI\_ISL\_563493  
VIC11771 EPI\_ISL\_591611  
VIC11772 EPI\_ISL\_591600  
VIC11773 EPI\_ISL\_563494  
VIC11774 EPI\_ISL\_563495  
VIC11775 EPI\_ISL\_591846  
VIC11776 EPI\_ISL\_591847  
VIC11777 EPI\_ISL\_591848  
VIC11778 EPI\_ISL\_563496  
VIC11779 EPI\_ISL\_641112  
VIC1178 EPI\_ISL\_430674  
VIC11780 EPI\_ISL\_641216  
VIC11781 EPI\_ISL\_591849  
VIC11782 EPI\_ISL\_591850  
VIC11787 EPI\_ISL\_591852  
VIC11791 EPI\_ISL\_591853  
VIC11793 EPI\_ISL\_591684  
VIC11794 EPI\_ISL\_591592  
VIC11796 EPI\_ISL\_591824  
VIC11797 EPI\_ISL\_591854  
VIC11799 EPI\_ISL\_591623  
VIC118 EPI\_ISL\_419719  
VIC11800 EPI\_ISL\_591856  
VIC11803 EPI\_ISL\_591858  
VIC11804 EPI\_ISL\_591792  
VIC1181 EPI\_ISL\_430627  
VIC11811 EPI\_ISL\_591860  
VIC11812 Rejected  
VIC11817 EPI\_ISL\_591861  
VIC11819 EPI\_ISL\_591862  
VIC11820 EPI\_ISL\_591863  
VIC11822 EPI\_ISL\_591864  
VIC11826 EPI\_ISL\_591866  
VIC11833 EPI\_ISL\_591870  
VIC11835 EPI\_ISL\_591871  
VIC11836 EPI\_ISL\_591688  
VIC11841 EPI\_ISL\_591872  
VIC11850 EPI\_ISL\_563497  
VIC11854 EPI\_ISL\_591873  
VIC1186 EPI\_ISL\_430629  
VIC11860 EPI\_ISL\_640763  
VIC1187 EPI\_ISL\_430675  
VIC11871 EPI\_ISL\_591878  
VIC11872 EPI\_ISL\_591879  
VIC11878 EPI\_ISL\_591881  
VIC11881 EPI\_ISL\_591883  
VIC1189 EPI\_ISL\_430521  
VIC11890 EPI\_ISL\_591884

VIC11899 EPI\_ISL\_591887  
VIC119 EPI\_ISL\_419726  
VIC11900 EPI\_ISL\_591657  
VIC11902 EPI\_ISL\_591889  
VIC11906 EPI\_ISL\_591890  
VIC11908 EPI\_ISL\_591585  
VIC11909 EPI\_ISL\_591891  
VIC11914 EPI\_ISL\_591894  
VIC11918 EPI\_ISL\_591895  
VIC1192 EPI\_ISL\_430528  
VIC11921 EPI\_ISL\_591896  
VIC11927 EPI\_ISL\_563498  
VIC11934 EPI\_ISL\_591897  
VIC11937 EPI\_ISL\_563499  
VIC11942 EPI\_ISL\_591899  
VIC11943 EPI\_ISL\_591900  
VIC11948 EPI\_ISL\_641121  
VIC11950 EPI\_ISL\_591901  
VIC11958 EPI\_ISL\_640449  
VIC11960 EPI\_ISL\_561810  
VIC11961 EPI\_ISL\_591904  
VIC11963 EPI\_ISL\_591628  
VIC11964 Rejected  
VIC11968 EPI\_ISL\_591712  
VIC1197 EPI\_ISL\_430506  
VIC11970 Rejected  
VIC11972 EPI\_ISL\_640614  
VIC11973 EPI\_ISL\_563500  
VIC11974 EPI\_ISL\_640444  
VIC11975 EPI\_ISL\_640924  
VIC11976 EPI\_ISL\_563501  
VIC11978 EPI\_ISL\_563502  
VIC1198 EPI\_ISL\_430507  
VIC11981 EPI\_ISL\_641045  
VIC11983 EPI\_ISL\_591905  
VIC11985 EPI\_ISL\_640557  
VIC11988 EPI\_ISL\_591906  
VIC1199 EPI\_ISL\_430523  
VIC11990 EPI\_ISL\_640313  
VIC11991 EPI\_ISL\_640855  
VIC11992 EPI\_ISL\_591656  
VIC11993 EPI\_ISL\_640473  
VIC11994 EPI\_ISL\_591907  
VIC11996 EPI\_ISL\_563503  
VIC11997 EPI\_ISL\_563504  
VIC11998 EPI\_ISL\_640916  
VIC11999 EPI\_ISL\_591908  
VIC12 EPI\_ISL\_416518  
VIC120 EPI\_ISL\_419722  
VIC1200 EPI\_ISL\_430527  
VIC12000 EPI\_ISL\_640579  
VIC12002 EPI\_ISL\_640908

VIC12003 EPI\_ISL\_640309  
VIC12005 EPI\_ISL\_640544  
VIC12009 EPI\_ISL\_640513  
VIC12010 EPI\_ISL\_563505  
VIC12012 EPI\_ISL\_640743  
VIC12013 EPI\_ISL\_640529  
VIC12014 EPI\_ISL\_563506  
VIC12015 EPI\_ISL\_640957  
VIC12016 EPI\_ISL\_640726  
VIC12017 EPI\_ISL\_640838  
VIC12018 EPI\_ISL\_563507  
VIC12020 EPI\_ISL\_563508  
VIC12022 EPI\_ISL\_641096  
VIC12023 EPI\_ISL\_640834  
VIC12026 EPI\_ISL\_640524  
VIC12027 EPI\_ISL\_641046  
VIC12028 EPI\_ISL\_640923  
VIC12029 EPI\_ISL\_591558  
VIC12030 EPI\_ISL\_561841  
VIC12031 EPI\_ISL\_563509  
VIC12033 EPI\_ISL\_591909  
VIC12034 EPI\_ISL\_563510  
VIC12036 EPI\_ISL\_563511  
VIC12038 EPI\_ISL\_561795  
VIC12039 EPI\_ISL\_563513  
VIC12043 EPI\_ISL\_562063  
VIC12046 EPI\_ISL\_641233  
VIC12047 EPI\_ISL\_640451  
VIC12048 EPI\_ISL\_640550  
VIC12049 EPI\_ISL\_641066  
VIC12052 EPI\_ISL\_641091  
VIC12053 EPI\_ISL\_641101  
VIC12054 EPI\_ISL\_641173  
VIC12055 EPI\_ISL\_641199  
VIC12056 EPI\_ISL\_591910  
VIC12058 Rejected  
VIC12059 EPI\_ISL\_591911  
VIC12061 EPI\_ISL\_563514  
VIC12062 EPI\_ISL\_640817  
VIC12063 EPI\_ISL\_563515  
VIC12065 EPI\_ISL\_641090  
VIC12066 EPI\_ISL\_563516  
VIC12070 EPI\_ISL\_641062  
VIC12071 EPI\_ISL\_641034  
VIC12073 EPI\_ISL\_641209  
VIC12075 EPI\_ISL\_641242  
VIC12077 EPI\_ISL\_563517  
VIC12078 EPI\_ISL\_640514  
VIC12079 EPI\_ISL\_603043  
VIC1208 EPI\_ISL\_430498  
VIC12080 EPI\_ISL\_641154  
VIC12081 EPI\_ISL\_563518

VIC12082 EPI\_ISL\_591912  
VIC12083 EPI\_ISL\_591913  
VIC12084 EPI\_ISL\_563519  
VIC12085 EPI\_ISL\_591914  
VIC12086 EPI\_ISL\_563520  
VIC12087 EPI\_ISL\_640925  
VIC12088 EPI\_ISL\_563521  
VIC12089 EPI\_ISL\_591915  
VIC1209 EPI\_ISL\_430499  
VIC12090 EPI\_ISL\_640714  
VIC12091 EPI\_ISL\_640999  
VIC12092 EPI\_ISL\_640624  
VIC12093 Rejected  
VIC12095 EPI\_ISL\_640595  
VIC12096 EPI\_ISL\_641006  
VIC12097 EPI\_ISL\_641103  
VIC12098 EPI\_ISL\_640933  
VIC121 EPI\_ISL\_419723  
VIC1210 EPI\_ISL\_430500  
VIC12100 EPI\_ISL\_563522  
VIC12105 EPI\_ISL\_640353  
VIC12106 EPI\_ISL\_641025  
VIC12107 EPI\_ISL\_591916  
VIC12108 EPI\_ISL\_640892  
VIC1211 EPI\_ISL\_430501  
VIC12110 EPI\_ISL\_591917  
VIC12114 EPI\_ISL\_563524  
VIC12115 EPI\_ISL\_641011  
VIC12116 EPI\_ISL\_641065  
VIC12117 EPI\_ISL\_641228  
VIC12118 EPI\_ISL\_641035  
VIC1212 EPI\_ISL\_430502  
VIC12120 EPI\_ISL\_591918  
VIC12121 EPI\_ISL\_640437  
VIC12122 EPI\_ISL\_563525  
VIC12125 EPI\_ISL\_591919  
VIC12126 EPI\_ISL\_563526  
VIC12129 EPI\_ISL\_563527  
VIC1213 EPI\_ISL\_430503  
VIC12131 EPI\_ISL\_641251  
VIC12132 EPI\_ISL\_591920  
VIC12133 EPI\_ISL\_561505  
VIC12135 EPI\_ISL\_641133  
VIC12136 EPI\_ISL\_641108  
VIC12137 EPI\_ISL\_563528  
VIC12139 EPI\_ISL\_641160  
VIC12141 EPI\_ISL\_641099  
VIC12142 EPI\_ISL\_640410  
VIC12143 EPI\_ISL\_563529  
VIC12144 EPI\_ISL\_591707  
VIC12145 EPI\_ISL\_640380  
VIC12147 EPI\_ISL\_640635

VIC12148 EPI\_ISL\_591921  
VIC1215 EPI\_ISL\_430508  
VIC12150 EPI\_ISL\_641147  
VIC12151 EPI\_ISL\_640435  
VIC12152 EPI\_ISL\_641063  
VIC12153 EPI\_ISL\_640549  
VIC12154 EPI\_ISL\_641289  
VIC12157 EPI\_ISL\_563530  
VIC12160 EPI\_ISL\_640388  
VIC12163 EPI\_ISL\_563531  
VIC12166 EPI\_ISL\_641004  
VIC12167 EPI\_ISL\_640328  
VIC12168 EPI\_ISL\_563532  
VIC12169 EPI\_ISL\_563533  
VIC12170 EPI\_ISL\_591666  
VIC12171 EPI\_ISL\_640318  
VIC12174 EPI\_ISL\_640983  
VIC12175 EPI\_ISL\_591922  
VIC12176 EPI\_ISL\_640486  
VIC12177 EPI\_ISL\_563534  
VIC12178 EPI\_ISL\_561704  
VIC12180 EPI\_ISL\_641248  
VIC12181 EPI\_ISL\_563535  
VIC12182 EPI\_ISL\_591923  
VIC12183 EPI\_ISL\_563536  
VIC12186 Rejected  
VIC12188 EPI\_ISL\_591701  
VIC12189 EPI\_ISL\_591924  
VIC1219 EPI\_ISL\_430516  
VIC12191 EPI\_ISL\_591643  
VIC12192 Rejected  
VIC12193 EPI\_ISL\_591925  
VIC12195 EPI\_ISL\_563537  
VIC12196 EPI\_ISL\_1055300  
VIC12198 EPI\_ISL\_640411  
VIC12199 EPI\_ISL\_591926  
VIC122 EPI\_ISL\_419724  
VIC1220 EPI\_ISL\_430517  
VIC12200 EPI\_ISL\_640716  
VIC12201 EPI\_ISL\_562045  
VIC12202 EPI\_ISL\_591927  
VIC12203 EPI\_ISL\_591928  
VIC12204 EPI\_ISL\_591929  
VIC12205 EPI\_ISL\_591930  
VIC12206 EPI\_ISL\_641020  
VIC12207 EPI\_ISL\_563538  
VIC12208 EPI\_ISL\_561415  
VIC12209 EPI\_ISL\_563539  
VIC1221 EPI\_ISL\_430518  
VIC12210 EPI\_ISL\_563540  
VIC12211 EPI\_ISL\_591931  
VIC12213 EPI\_ISL\_562075

VIC12214 EPI\_ISL\_563541  
VIC12217 EPI\_ISL\_591932  
VIC12218 EPI\_ISL\_640679  
VIC1222 EPI\_ISL\_430519  
VIC12220 EPI\_ISL\_640856  
VIC12221 EPI\_ISL\_591933  
VIC12222 EPI\_ISL\_640994  
VIC12223 EPI\_ISL\_563542  
VIC12224 EPI\_ISL\_561896  
VIC12225 EPI\_ISL\_591934  
VIC12226 EPI\_ISL\_563543  
VIC12227 EPI\_ISL\_640811  
VIC12228 EPI\_ISL\_563544  
VIC12229 EPI\_ISL\_640367  
VIC12230 EPI\_ISL\_591935  
VIC12231 EPI\_ISL\_640462  
VIC12234 EPI\_ISL\_640750  
VIC12235 EPI\_ISL\_561585  
VIC12237 EPI\_ISL\_563546  
VIC12239 EPI\_ISL\_591610  
VIC1224 EPI\_ISL\_430522  
VIC12240 EPI\_ISL\_563547  
VIC12241 EPI\_ISL\_640663  
VIC12244 EPI\_ISL\_563548  
VIC12248 EPI\_ISL\_563550  
VIC12250 EPI\_ISL\_640500  
VIC12254 EPI\_ISL\_591936  
VIC12256 EPI\_ISL\_591937  
VIC12258 EPI\_ISL\_591938  
VIC12259 EPI\_ISL\_640592  
VIC12265 EPI\_ISL\_640379  
VIC12266 EPI\_ISL\_640402  
VIC12267 EPI\_ISL\_591939  
VIC12268 EPI\_ISL\_640384  
VIC12269 EPI\_ISL\_640884  
VIC12271 EPI\_ISL\_591940  
VIC12274 EPI\_ISL\_591943  
VIC12280 EPI\_ISL\_591947  
VIC12281 EPI\_ISL\_591948  
VIC12284 EPI\_ISL\_641073  
VIC12285 EPI\_ISL\_640572  
VIC12286 EPI\_ISL\_640609  
VIC12287 EPI\_ISL\_640729  
VIC12288 EPI\_ISL\_640852  
VIC12289 EPI\_ISL\_640938  
VIC12299 EPI\_ISL\_1055301  
VIC123 EPI\_ISL\_419731  
VIC12300 Rejected  
VIC12306 EPI\_ISL\_591952  
VIC12309 Rejected  
VIC12310 EPI\_ISL\_591954  
VIC12311 EPI\_ISL\_591955

VIC12314 EPI\_ISL\_591956  
VIC12331 EPI\_ISL\_640494  
VIC12332 EPI\_ISL\_640886  
VIC12335 EPI\_ISL\_641174  
VIC12336 EPI\_ISL\_641290  
VIC12338 EPI\_ISL\_591713  
VIC12339 EPI\_ISL\_591961  
VIC1234 EPI\_ISL\_430511  
VIC12341 EPI\_ISL\_591962  
VIC12342 EPI\_ISL\_591963  
VIC12343 EPI\_ISL\_640570  
VIC12345 EPI\_ISL\_591964  
VIC12346 EPI\_ISL\_640865  
VIC12348 EPI\_ISL\_591965  
VIC12349 EPI\_ISL\_591966  
VIC1235 EPI\_ISL\_430512  
VIC12350 EPI\_ISL\_563552  
VIC12352 EPI\_ISL\_563553  
VIC12353 EPI\_ISL\_591598  
VIC12354 EPI\_ISL\_640905  
VIC12355 EPI\_ISL\_641225  
VIC12356 EPI\_ISL\_563554  
VIC12359 Rejected  
VIC12360 EPI\_ISL\_641027  
VIC12361 EPI\_ISL\_563555  
VIC12362 EPI\_ISL\_640314  
VIC12363 EPI\_ISL\_640576  
VIC12365 EPI\_ISL\_640324  
VIC12367 EPI\_ISL\_591967  
VIC12368 EPI\_ISL\_591969  
VIC12369 EPI\_ISL\_640877  
VIC1237 EPI\_ISL\_430525  
VIC12370 EPI\_ISL\_641117  
VIC12371 EPI\_ISL\_640913  
VIC12373 EPI\_ISL\_640717  
VIC12374 EPI\_ISL\_591970  
VIC12375 EPI\_ISL\_640417  
VIC12376 EPI\_ISL\_640733  
VIC12377 EPI\_ISL\_640765  
VIC12378 EPI\_ISL\_591971  
VIC1238 Rejected  
VIC12380 EPI\_ISL\_563556  
VIC12381 EPI\_ISL\_561537  
VIC12382 EPI\_ISL\_591972  
VIC12383 EPI\_ISL\_591973  
VIC12384 EPI\_ISL\_640669  
VIC12385 EPI\_ISL\_563557  
VIC12387 EPI\_ISL\_591974  
VIC12388 EPI\_ISL\_591975  
VIC12389 EPI\_ISL\_563558  
VIC12390 EPI\_ISL\_640495  
VIC12391 EPI\_ISL\_591601

VIC12395 EPI\_ISL\_591976  
VIC12398 EPI\_ISL\_640664  
VIC12399 EPI\_ISL\_591977  
VIC1240 EPI\_ISL\_1055302  
VIC12400 EPI\_ISL\_563559  
VIC12403 EPI\_ISL\_641130  
VIC12404 EPI\_ISL\_591978  
VIC12405 EPI\_ISL\_640622  
VIC12407 EPI\_ISL\_563560  
VIC12408 EPI\_ISL\_591979  
VIC12409 EPI\_ISL\_591980  
VIC12410 EPI\_ISL\_563561  
VIC12411 EPI\_ISL\_640596  
VIC12412 EPI\_ISL\_640433  
VIC12413 EPI\_ISL\_591981  
VIC12414 EPI\_ISL\_640830  
VIC12416 EPI\_ISL\_640365  
VIC12417 EPI\_ISL\_591982  
VIC12418 EPI\_ISL\_563562  
VIC12419 EPI\_ISL\_591983  
VIC12420 EPI\_ISL\_591984  
VIC12421 EPI\_ISL\_641250  
VIC12422 EPI\_ISL\_640767  
VIC12423 EPI\_ISL\_641270  
VIC12424 EPI\_ISL\_591985  
VIC12425 EPI\_ISL\_640659  
VIC12426 EPI\_ISL\_640558  
VIC12427 EPI\_ISL\_591986  
VIC12428 EPI\_ISL\_591987  
VIC12430 EPI\_ISL\_591988  
VIC12431 EPI\_ISL\_591989  
VIC12432 EPI\_ISL\_640369  
VIC12433 EPI\_ISL\_640419  
VIC12434 EPI\_ISL\_641168  
VIC12435 EPI\_ISL\_641042  
VIC12437 EPI\_ISL\_641040  
VIC12438 EPI\_ISL\_563563  
VIC12439 EPI\_ISL\_640984  
VIC12440 EPI\_ISL\_640816  
VIC12442 EPI\_ISL\_640577  
VIC12443 EPI\_ISL\_591990  
VIC12444 EPI\_ISL\_640434  
VIC12445 EPI\_ISL\_641291  
VIC12446 EPI\_ISL\_640363  
VIC12448 EPI\_ISL\_640536  
VIC12449 EPI\_ISL\_563564  
VIC12450 EPI\_ISL\_591991  
VIC12451 EPI\_ISL\_591992  
VIC12452 EPI\_ISL\_591993  
VIC12453 EPI\_ISL\_563565  
VIC12454 EPI\_ISL\_640505  
VIC12455 EPI\_ISL\_640469



VIC12456 EPI\_ISL\_640929  
VIC12457 EPI\_ISL\_562724  
VIC12458 EPI\_ISL\_591994  
VIC12459 EPI\_ISL\_641262  
VIC12460 EPI\_ISL\_591995  
VIC12461 EPI\_ISL\_591996  
VIC12462 EPI\_ISL\_591997  
VIC12463 EPI\_ISL\_640668  
VIC12465 EPI\_ISL\_562615  
VIC12466 EPI\_ISL\_591998  
VIC12467 EPI\_ISL\_641282  
VIC12468 EPI\_ISL\_591999  
VIC12469 EPI\_ISL\_591693  
VIC12470 EPI\_ISL\_641128  
VIC12471 EPI\_ISL\_640397  
VIC12472 EPI\_ISL\_592000  
VIC12473 EPI\_ISL\_641016  
VIC12474 EPI\_ISL\_592001  
VIC12475 EPI\_ISL\_640710  
VIC12476 EPI\_ISL\_563566  
VIC12477 EPI\_ISL\_591674  
VIC12478 EPI\_ISL\_592002  
VIC12479 EPI\_ISL\_592003  
VIC12480 EPI\_ISL\_592004  
VIC12481 EPI\_ISL\_592005  
VIC12482 EPI\_ISL\_640464  
VIC12484 EPI\_ISL\_563567  
VIC12485 EPI\_ISL\_641043  
VIC12486 EPI\_ISL\_592006  
VIC12487 EPI\_ISL\_592007  
VIC12488 EPI\_ISL\_640627  
VIC12489 EPI\_ISL\_591624  
VIC12490 EPI\_ISL\_641131  
VIC12491 EPI\_ISL\_592008  
VIC12492 EPI\_ISL\_592009  
VIC12493 EPI\_ISL\_592010  
VIC12494 EPI\_ISL\_640800  
VIC12495 EPI\_ISL\_640351  
VIC12496 EPI\_ISL\_592011  
VIC12497 EPI\_ISL\_640567  
VIC12498 EPI\_ISL\_592012  
VIC12499 EPI\_ISL\_640910  
VIC12500 EPI\_ISL\_641019  
VIC12501 EPI\_ISL\_640354  
VIC12502 EPI\_ISL\_640880  
VIC12504 EPI\_ISL\_640329  
VIC12505 EPI\_ISL\_591812  
VIC12506 EPI\_ISL\_640358  
VIC12507 EPI\_ISL\_641032  
VIC12511 EPI\_ISL\_591692  
VIC12514 EPI\_ISL\_641159  
VIC12515 EPI\_ISL\_641201

VIC12516 EPI\_ISL\_640911  
VIC12517 EPI\_ISL\_592013  
VIC12521 EPI\_ISL\_640335  
VIC12523 EPI\_ISL\_641087  
VIC12524 EPI\_ISL\_563568  
VIC12525 EPI\_ISL\_592015  
VIC12526 EPI\_ISL\_563569  
VIC12528 EPI\_ISL\_592016  
VIC12529 EPI\_ISL\_592017  
VIC12531 EPI\_ISL\_641146  
VIC12532 EPI\_ISL\_592018  
VIC12534 EPI\_ISL\_592019  
VIC12535 EPI\_ISL\_563570  
VIC12536 EPI\_ISL\_592020  
VIC12537 EPI\_ISL\_640312  
VIC12538 EPI\_ISL\_640394  
VIC12540 Rejected  
VIC12542 EPI\_ISL\_592021  
VIC12543 EPI\_ISL\_640821  
VIC12544 EPI\_ISL\_640688  
VIC12549 EPI\_ISL\_592022  
VIC12550 EPI\_ISL\_591658  
VIC12551 EPI\_ISL\_563571  
VIC12552 EPI\_ISL\_592023  
VIC12553 EPI\_ISL\_640441  
VIC12555 EPI\_ISL\_563572  
VIC12556 EPI\_ISL\_641274  
VIC12557 EPI\_ISL\_640350  
VIC12558 EPI\_ISL\_640888  
VIC12559 EPI\_ISL\_641068  
VIC12560 EPI\_ISL\_640781  
VIC12561 EPI\_ISL\_641132  
VIC12562 EPI\_ISL\_640315  
VIC12563 EPI\_ISL\_640801  
VIC12564 EPI\_ISL\_591606  
VIC12565 EPI\_ISL\_592024  
VIC12566 EPI\_ISL\_640864  
VIC12567 EPI\_ISL\_641111  
VIC12568 EPI\_ISL\_641156  
VIC12570 EPI\_ISL\_640785  
VIC12573 EPI\_ISL\_592025  
VIC12577 EPI\_ISL\_641015  
VIC12578 EPI\_ISL\_592026  
VIC12579 EPI\_ISL\_641082  
VIC12580 EPI\_ISL\_592027  
VIC12581 EPI\_ISL\_640661  
VIC12582 EPI\_ISL\_591648  
VIC12583 EPI\_ISL\_592028  
VIC12585 EPI\_ISL\_563573  
VIC12586 EPI\_ISL\_641023  
VIC12587 EPI\_ISL\_592029  
VIC12588 EPI\_ISL\_592030

VIC12589 EPI\_ISL\_640825  
VIC12590 EPI\_ISL\_640430  
VIC12591 EPI\_ISL\_563574  
VIC12592 EPI\_ISL\_641272  
VIC12593 EPI\_ISL\_640787  
VIC12594 EPI\_ISL\_592031  
VIC12596 EPI\_ISL\_592032  
VIC12597 EPI\_ISL\_563575  
VIC12598 EPI\_ISL\_640672  
VIC126 EPI\_ISL\_419728  
VIC12600 EPI\_ISL\_592033  
VIC12602 EPI\_ISL\_592034  
VIC12603 EPI\_ISL\_592035  
VIC12604 EPI\_ISL\_563576  
VIC12605 EPI\_ISL\_640601  
VIC12606 EPI\_ISL\_592036  
VIC12607 EPI\_ISL\_640396  
VIC12609 EPI\_ISL\_640598  
VIC12611 EPI\_ISL\_640897  
VIC12612 EPI\_ISL\_592037  
VIC12613 EPI\_ISL\_592038  
VIC12614 EPI\_ISL\_640454  
VIC12615 EPI\_ISL\_592039  
VIC12616 EPI\_ISL\_592040  
VIC12617 EPI\_ISL\_640730  
VIC12618 EPI\_ISL\_640555  
VIC12620 Rejected  
VIC12621 EPI\_ISL\_561659  
VIC12622 EPI\_ISL\_591563  
VIC12623 EPI\_ISL\_640532  
VIC12627 EPI\_ISL\_591649  
VIC12629 EPI\_ISL\_640656  
VIC12630 EPI\_ISL\_640762  
VIC12631 EPI\_ISL\_640546  
VIC12634 EPI\_ISL\_591687  
VIC12635 EPI\_ISL\_641183  
VIC12636 EPI\_ISL\_640935  
VIC12637 EPI\_ISL\_561598  
VIC12638 EPI\_ISL\_640728  
VIC12639 EPI\_ISL\_592041  
VIC12640 EPI\_ISL\_591564  
VIC12642 EPI\_ISL\_640336  
VIC12643 EPI\_ISL\_592042  
VIC12646 Rejected  
VIC12647 EPI\_ISL\_592043  
VIC12651 EPI\_ISL\_592045  
VIC12652 EPI\_ISL\_640698  
VIC12653 EPI\_ISL\_592046  
VIC12654 EPI\_ISL\_640859  
VIC12655 EPI\_ISL\_640947  
VIC12657 EPI\_ISL\_641226  
VIC12658 EPI\_ISL\_592047

VIC12659 EPI\_ISL\_641298  
VIC12660 EPI\_ISL\_592048  
VIC12661 EPI\_ISL\_563577  
VIC12663 EPI\_ISL\_640574  
VIC12664 EPI\_ISL\_640678  
VIC12665 EPI\_ISL\_640408  
VIC12667 EPI\_ISL\_640569  
VIC12668 EPI\_ISL\_592049  
VIC12669 EPI\_ISL\_641219  
VIC12670 EPI\_ISL\_592050  
VIC12671 EPI\_ISL\_592051  
VIC12672 EPI\_ISL\_592052  
VIC12674 EPI\_ISL\_640405  
VIC12675 EPI\_ISL\_640955  
VIC12679 EPI\_ISL\_592053  
VIC12682 EPI\_ISL\_592054  
VIC12683 EPI\_ISL\_640904  
VIC12684 EPI\_ISL\_592055  
VIC12686 EPI\_ISL\_640421  
VIC12687 EPI\_ISL\_641238  
VIC12688 EPI\_ISL\_640922  
VIC12689 EPI\_ISL\_592056  
VIC12690 EPI\_ISL\_640446  
VIC12691 EPI\_ISL\_640934  
VIC12692 EPI\_ISL\_592057  
VIC12694 EPI\_ISL\_563578  
VIC12695 EPI\_ISL\_562064  
VIC12696 EPI\_ISL\_563579  
VIC12697 EPI\_ISL\_641152  
VIC12698 EPI\_ISL\_592058  
VIC12699 EPI\_ISL\_640456  
VIC127 EPI\_ISL\_419729  
VIC12700 EPI\_ISL\_592059  
VIC12701 EPI\_ISL\_592060  
VIC12702 EPI\_ISL\_640646  
VIC12703 EPI\_ISL\_640691  
VIC12704 EPI\_ISL\_640893  
VIC12705 Rejected  
VIC12706 EPI\_ISL\_640791  
VIC12707 EPI\_ISL\_640705  
VIC12708 Rejected  
VIC12709 EPI\_ISL\_640850  
VIC12711 EPI\_ISL\_640460  
VIC12712 EPI\_ISL\_563581  
VIC12713 EPI\_ISL\_640308  
VIC12714 EPI\_ISL\_640862  
VIC12715 EPI\_ISL\_563582  
VIC12717 EPI\_ISL\_641267  
VIC12721 EPI\_ISL\_592061  
VIC12722 EPI\_ISL\_592062  
VIC12723 EPI\_ISL\_592063  
VIC12725 EPI\_ISL\_640887

VIC12726 EPI\_ISL\_640450  
VIC12727 EPI\_ISL\_640959  
VIC12728 EPI\_ISL\_640333  
VIC12729 EPI\_ISL\_592065  
VIC12730 EPI\_ISL\_592066  
VIC12731 EPI\_ISL\_561461  
VIC12732 EPI\_ISL\_592067  
VIC12733 EPI\_ISL\_563583  
VIC12734 EPI\_ISL\_563584  
VIC12736 EPI\_ISL\_592068  
VIC12737 EPI\_ISL\_563585  
VIC12738 EPI\_ISL\_592069  
VIC12739 EPI\_ISL\_641296  
VIC12740 EPI\_ISL\_592070  
VIC12741 EPI\_ISL\_640322  
VIC12742 EPI\_ISL\_563586  
VIC12743 EPI\_ISL\_563587  
VIC12744 EPI\_ISL\_641071  
VIC12745 EPI\_ISL\_591673  
VIC12746 EPI\_ISL\_640507  
VIC12747 EPI\_ISL\_561874  
VIC12748 EPI\_ISL\_640530  
VIC12750 EPI\_ISL\_563588  
VIC12753 EPI\_ISL\_641235  
VIC12754 EPI\_ISL\_641239  
VIC12755 EPI\_ISL\_640615  
VIC12756 EPI\_ISL\_563589  
VIC12757 EPI\_ISL\_592071  
VIC12759 EPI\_ISL\_592072  
VIC12760 EPI\_ISL\_641084  
VIC12761 EPI\_ISL\_592073  
VIC12762 EPI\_ISL\_592074  
VIC12763 EPI\_ISL\_640837  
VIC12764 EPI\_ISL\_592075  
VIC12765 EPI\_ISL\_592076  
VIC12766 EPI\_ISL\_640490  
VIC12767 EPI\_ISL\_640416  
VIC12768 EPI\_ISL\_641192  
VIC12769 EPI\_ISL\_640724  
VIC12770 EPI\_ISL\_563590  
VIC12771 EPI\_ISL\_640452  
VIC12772 EPI\_ISL\_563591  
VIC12773 EPI\_ISL\_563592  
VIC12774 EPI\_ISL\_640744  
VIC12775 EPI\_ISL\_641240  
VIC12776 EPI\_ISL\_563593  
VIC12777 EPI\_ISL\_640597  
VIC12778 EPI\_ISL\_592077  
VIC12779 EPI\_ISL\_640899  
VIC12780 EPI\_ISL\_592078  
VIC12781 EPI\_ISL\_640372  
VIC12782 EPI\_ISL\_640697

VIC12783 EPI\_ISL\_640861  
VIC12785 EPI\_ISL\_641204  
VIC12786 EPI\_ISL\_640875  
VIC12787 EPI\_ISL\_592079  
VIC12788 EPI\_ISL\_641229  
VIC12789 EPI\_ISL\_640331  
VIC1279 EPI\_ISL\_430678  
VIC12790 EPI\_ISL\_592080  
VIC12791 EPI\_ISL\_591696  
VIC12792 EPI\_ISL\_640901  
VIC12793 EPI\_ISL\_562616  
VIC12796 EPI\_ISL\_563595  
VIC12797 EPI\_ISL\_592081  
VIC12798 EPI\_ISL\_641005  
VIC12799 EPI\_ISL\_640594  
VIC128 EPI\_ISL\_419730  
VIC1280 EPI\_ISL\_430709  
VIC12801 EPI\_ISL\_592082  
VIC12802 EPI\_ISL\_592083  
VIC12803 EPI\_ISL\_563596  
VIC12804 EPI\_ISL\_561892  
VIC12805 EPI\_ISL\_591579  
VIC12806 EPI\_ISL\_640826  
VIC12808 EPI\_ISL\_641089  
VIC12809 EPI\_ISL\_563597  
VIC12810 EPI\_ISL\_592084  
VIC12811 EPI\_ISL\_641195  
VIC12812 EPI\_ISL\_591699  
VIC12814 EPI\_ISL\_641129  
VIC12815 EPI\_ISL\_640878  
VIC12816 EPI\_ISL\_563598  
VIC12820 EPI\_ISL\_640773  
VIC12821 EPI\_ISL\_640996  
VIC12823 EPI\_ISL\_640377  
VIC12825 EPI\_ISL\_592085  
VIC12826 EPI\_ISL\_592086  
VIC12827 EPI\_ISL\_640677  
VIC12828 EPI\_ISL\_640755  
VIC12830 EPI\_ISL\_640348  
VIC12831 EPI\_ISL\_592087  
VIC12832 EPI\_ISL\_592088  
VIC12833 EPI\_ISL\_563599  
VIC12834 EPI\_ISL\_1055303  
VIC12835 EPI\_ISL\_1055304  
VIC12837 EPI\_ISL\_592089  
VIC12838 EPI\_ISL\_640651  
VIC12839 EPI\_ISL\_563600  
VIC1284 EPI\_ISL\_430701  
VIC12840 EPI\_ISL\_641293  
VIC12841 EPI\_ISL\_640547  
VIC12842 EPI\_ISL\_640655  
VIC12843 EPI\_ISL\_641203

VIC12844 EPI\_ISL\_640303  
VIC12845 EPI\_ISL\_640976  
VIC12846 EPI\_ISL\_591797  
VIC12847 EPI\_ISL\_562594  
VIC12848 EPI\_ISL\_592090  
VIC12849 EPI\_ISL\_640560  
VIC1285 EPI\_ISL\_430702  
VIC12851 EPI\_ISL\_563601  
VIC12852 EPI\_ISL\_641283  
VIC12853 EPI\_ISL\_641140  
VIC12854 EPI\_ISL\_640761  
VIC12855 EPI\_ISL\_561834  
VIC12856 EPI\_ISL\_640759  
VIC12857 EPI\_ISL\_591599  
VIC12858 EPI\_ISL\_592091  
VIC12859 EPI\_ISL\_591798  
VIC12861 EPI\_ISL\_640465  
VIC12862 EPI\_ISL\_641245  
VIC12863 EPI\_ISL\_592092  
VIC12864 EPI\_ISL\_592093  
VIC12866 EPI\_ISL\_592094  
VIC12867 EPI\_ISL\_592095  
VIC12868 EPI\_ISL\_592096  
VIC12869 EPI\_ISL\_592097  
VIC12870 EPI\_ISL\_563602  
VIC12871 EPI\_ISL\_592098  
VIC12872 EPI\_ISL\_640508  
VIC12873 EPI\_ISL\_563603  
VIC12874 EPI\_ISL\_640920  
VIC12876 EPI\_ISL\_592099  
VIC12878 EPI\_ISL\_641252  
VIC12879 EPI\_ISL\_640360  
VIC12881 EPI\_ISL\_592100  
VIC12882 EPI\_ISL\_640327  
VIC12886 EPI\_ISL\_1055305  
VIC12888 EPI\_ISL\_563604  
VIC12889 EPI\_ISL\_640694  
VIC12890 EPI\_ISL\_640960  
VIC12892 EPI\_ISL\_641297  
VIC12893 EPI\_ISL\_592101  
VIC12894 EPI\_ISL\_640618  
VIC12895 EPI\_ISL\_640501  
VIC12897 EPI\_ISL\_592102  
VIC12898 EPI\_ISL\_640802  
VIC12899 EPI\_ISL\_640828  
VIC129 EPI\_ISL\_419732  
VIC12900 EPI\_ISL\_591694  
VIC12901 EPI\_ISL\_592103  
VIC12902 EPI\_ISL\_592104  
VIC12903 EPI\_ISL\_592105  
VIC12904 EPI\_ISL\_591811  
VIC12905 EPI\_ISL\_640943

VIC12906 EPI\_ISL\_640918  
VIC12907 EPI\_ISL\_640820  
VIC12908 EPI\_ISL\_641120  
VIC12909 EPI\_ISL\_649150  
VIC12910 EPI\_ISL\_641260  
VIC12911 EPI\_ISL\_640685  
VIC12912 EPI\_ISL\_640699  
VIC12913 EPI\_ISL\_563605  
VIC12914 EPI\_ISL\_592106  
VIC12915 EPI\_ISL\_592107  
VIC12916 EPI\_ISL\_640844  
VIC12917 EPI\_ISL\_640796  
VIC12918 EPI\_ISL\_641064  
VIC12919 EPI\_ISL\_592108  
VIC1292 EPI\_ISL\_430711  
VIC12920 EPI\_ISL\_592109  
VIC12921 EPI\_ISL\_563606  
VIC12922 EPI\_ISL\_563607  
VIC12923 EPI\_ISL\_563608  
VIC12924 EPI\_ISL\_592110  
VIC12925 EPI\_ISL\_591622  
VIC12927 EPI\_ISL\_591602  
VIC12928 EPI\_ISL\_592111  
VIC12929 EPI\_ISL\_592112  
VIC12930 EPI\_ISL\_640951  
VIC12931 EPI\_ISL\_592113  
VIC12933 EPI\_ISL\_592114  
VIC12937 EPI\_ISL\_562028  
VIC12938 EPI\_ISL\_591705  
VIC12939 EPI\_ISL\_592115  
VIC12940 EPI\_ISL\_592116  
VIC12941 EPI\_ISL\_592117  
VIC12942 EPI\_ISL\_591793  
VIC12943 EPI\_ISL\_592118  
VIC12945 EPI\_ISL\_591682  
VIC12946 EPI\_ISL\_592119  
VIC12948 EPI\_ISL\_591567  
VIC12949 EPI\_ISL\_563610  
VIC12950 EPI\_ISL\_592120  
VIC12952 EPI\_ISL\_592121  
VIC12954 EPI\_ISL\_591810  
VIC12955 EPI\_ISL\_563611  
VIC12956 EPI\_ISL\_592122  
VIC12959 EPI\_ISL\_592123  
VIC12960 EPI\_ISL\_563612  
VIC12961 EPI\_ISL\_592124  
VIC12962 EPI\_ISL\_592125  
VIC12963 EPI\_ISL\_640481  
VIC12964 EPI\_ISL\_592126  
VIC12965 EPI\_ISL\_592127  
VIC12966 EPI\_ISL\_563613  
VIC12968 EPI\_ISL\_592128



VIC12970 EPI\_ISL\_592129  
VIC12971 EPI\_ISL\_592130  
VIC12975 EPI\_ISL\_563614  
VIC12976 EPI\_ISL\_592131  
VIC12977 EPI\_ISL\_563615  
VIC12979 EPI\_ISL\_592132  
VIC12980 EPI\_ISL\_592133  
VIC12981 EPI\_ISL\_592134  
VIC12982 EPI\_ISL\_592135  
VIC12983 EPI\_ISL\_591587  
VIC12987 EPI\_ISL\_592137  
VIC12988 EPI\_ISL\_592138  
VIC12989 EPI\_ISL\_592139  
VIC12992 EPI\_ISL\_640970  
VIC12995 EPI\_ISL\_592142  
VIC12996 EPI\_ISL\_591580  
VIC12997 EPI\_ISL\_592143  
VIC12999 EPI\_ISL\_592144  
VIC13 EPI\_ISL\_419733  
VIC130 EPI\_ISL\_419823  
VIC13000 EPI\_ISL\_592145  
VIC13003 EPI\_ISL\_592146  
VIC13004 EPI\_ISL\_591573  
VIC13007 EPI\_ISL\_640356  
VIC13008 EPI\_ISL\_592147  
VIC1301 EPI\_ISL\_430679  
VIC13010 EPI\_ISL\_641057  
VIC13012 EPI\_ISL\_592148  
VIC13013 EPI\_ISL\_592149  
VIC13014 EPI\_ISL\_592150  
VIC13016 EPI\_ISL\_641061  
VIC13019 EPI\_ISL\_592151  
VIC13020 EPI\_ISL\_592152  
VIC13022 EPI\_ISL\_641036  
VIC13023 EPI\_ISL\_640961  
VIC13024 EPI\_ISL\_592154  
VIC13025 EPI\_ISL\_591562  
VIC13026 EPI\_ISL\_591706  
VIC13029 EPI\_ISL\_591621  
VIC1303 EPI\_ISL\_430694  
VIC13031 EPI\_ISL\_592156  
VIC13033 EPI\_ISL\_592157  
VIC13035 EPI\_ISL\_592159  
VIC13036 EPI\_ISL\_592160  
VIC13038 EPI\_ISL\_591571  
VIC13039 EPI\_ISL\_592161  
VIC13043 EPI\_ISL\_592162  
VIC13044 EPI\_ISL\_592163  
VIC13046 EPI\_ISL\_591654  
VIC13047 EPI\_ISL\_591619  
VIC13049 EPI\_ISL\_592164  
VIC1305 EPI\_ISL\_430705

VIC13050 EPI\_ISL\_592165  
VIC13051 EPI\_ISL\_592166  
VIC13054 EPI\_ISL\_592168  
VIC13055 EPI\_ISL\_592169  
VIC13056 EPI\_ISL\_641095  
VIC13059 EPI\_ISL\_562703  
VIC13060 EPI\_ISL\_641114  
VIC13061 EPI\_ISL\_592170  
VIC13062 EPI\_ISL\_640629  
VIC13063 EPI\_ISL\_592171  
VIC13066 EPI\_ISL\_563616  
VIC13069 EPI\_ISL\_592175  
VIC13075 EPI\_ISL\_641286  
VIC13077 EPI\_ISL\_641085  
VIC13078 EPI\_ISL\_592180  
VIC13079 EPI\_ISL\_640946  
VIC13082 EPI\_ISL\_563617  
VIC13086 EPI\_ISL\_640948  
VIC13089 EPI\_ISL\_641093  
VIC13091 EPI\_ISL\_592184  
VIC13093 EPI\_ISL\_563619  
VIC13095 EPI\_ISL\_640316  
VIC13099 EPI\_ISL\_641145  
VIC131 EPI\_ISL\_419824  
VIC13100 EPI\_ISL\_592188  
VIC13102 EPI\_ISL\_640746  
VIC13106 EPI\_ISL\_640956  
VIC13110 EPI\_ISL\_640919  
VIC13111 Rejected  
VIC13112 EPI\_ISL\_563621  
VIC13114 EPI\_ISL\_640620  
VIC13115 EPI\_ISL\_592189  
VIC13117 EPI\_ISL\_640953  
VIC13122 EPI\_ISL\_563622  
VIC13123 EPI\_ISL\_592191  
VIC13124 EPI\_ISL\_641022  
VIC1313 EPI\_ISL\_430714  
VIC13135 EPI\_ISL\_592194  
VIC13137 EPI\_ISL\_592195  
VIC13138 EPI\_ISL\_563623  
VIC13140 EPI\_ISL\_563624  
VIC13144 EPI\_ISL\_561784  
VIC13145 EPI\_ISL\_561530  
VIC13146 EPI\_ISL\_563625  
VIC13147 EPI\_ISL\_592196  
VIC13148 EPI\_ISL\_561638  
VIC1315 EPI\_ISL\_430689  
VIC13150 EPI\_ISL\_641030  
VIC13152 EPI\_ISL\_592197  
VIC13153 EPI\_ISL\_563626  
VIC13154 EPI\_ISL\_592198  
VIC13156 EPI\_ISL\_563627

VIC13159 EPI\_ISL\_561475  
VIC1316 EPI\_ISL\_430690  
VIC13160 EPI\_ISL\_640927  
VIC13161 EPI\_ISL\_562595  
VIC13163 EPI\_ISL\_640381  
VIC13165 EPI\_ISL\_640949  
VIC13166 EPI\_ISL\_641105  
VIC13167 EPI\_ISL\_592199  
VIC13169 EPI\_ISL\_591608  
VIC13170 EPI\_ISL\_641127  
VIC13171 EPI\_ISL\_592200  
VIC13172 EPI\_ISL\_592201  
VIC13173 EPI\_ISL\_562617  
VIC13174 Rejected  
VIC13175 EPI\_ISL\_592202  
VIC13176 EPI\_ISL\_640812  
VIC13177 EPI\_ISL\_592203  
VIC13178 EPI\_ISL\_563628  
VIC1318 EPI\_ISL\_430693  
VIC13180 EPI\_ISL\_563629  
VIC13181 EPI\_ISL\_563630  
VIC13182 EPI\_ISL\_563631  
VIC13183 EPI\_ISL\_563632  
VIC13184 EPI\_ISL\_563633  
VIC13185 EPI\_ISL\_592204  
VIC13186 EPI\_ISL\_563634  
VIC13188 EPI\_ISL\_563635  
VIC13189 EPI\_ISL\_563636  
VIC13191 EPI\_ISL\_592205  
VIC13192 EPI\_ISL\_641081  
VIC13193 EPI\_ISL\_640584  
VIC13195 EPI\_ISL\_563637  
VIC13197 EPI\_ISL\_640582  
VIC13199 EPI\_ISL\_563639  
VIC132 EPI\_ISL\_419825  
VIC13200 EPI\_ISL\_641302  
VIC13202 EPI\_ISL\_561995  
VIC13204 EPI\_ISL\_592206  
VIC13205 EPI\_ISL\_563640  
VIC13206 EPI\_ISL\_592207  
VIC13208 EPI\_ISL\_592208  
VIC13209 EPI\_ISL\_592209  
VIC13210 EPI\_ISL\_563641  
VIC13211 EPI\_ISL\_592210  
VIC13212 EPI\_ISL\_592211  
VIC13214 EPI\_ISL\_592212  
VIC13217 EPI\_ISL\_592213  
VIC13219 EPI\_ISL\_641151  
VIC13222 EPI\_ISL\_592214  
VIC13223 EPI\_ISL\_563642  
VIC13225 EPI\_ISL\_561860  
VIC13226 Rejected

VIC13227 EPI\_ISL\_563643  
VIC13228 EPI\_ISL\_591685  
VIC13229 EPI\_ISL\_592215  
VIC13230 EPI\_ISL\_561599  
VIC13231 EPI\_ISL\_640931  
VIC13233 EPI\_ISL\_561779  
VIC13236 EPI\_ISL\_563644  
VIC13237 EPI\_ISL\_592216  
VIC13238 EPI\_ISL\_563645  
VIC13239 Rejected  
VIC13240 EPI\_ISL\_1055306  
VIC13241 EPI\_ISL\_640985  
VIC13242 EPI\_ISL\_640766  
VIC13245 EPI\_ISL\_563646  
VIC13246 EPI\_ISL\_592217  
VIC13250 EPI\_ISL\_640779  
VIC13251 EPI\_ISL\_640713  
VIC13252 EPI\_ISL\_592218  
VIC13253 EPI\_ISL\_640361  
VIC13254 EPI\_ISL\_641281  
VIC13257 EPI\_ISL\_592219  
VIC13258 EPI\_ISL\_592220  
VIC13259 EPI\_ISL\_592221  
VIC13260 EPI\_ISL\_640439  
VIC13265 EPI\_ISL\_641271  
VIC13267 EPI\_ISL\_640640  
VIC13268 EPI\_ISL\_563647  
VIC13269 EPI\_ISL\_641018  
VIC13271 EPI\_ISL\_563648  
VIC13272 EPI\_ISL\_640403  
VIC13273 EPI\_ISL\_592222  
VIC13274 EPI\_ISL\_561835  
VIC13275 EPI\_ISL\_640808  
VIC13276 EPI\_ISL\_594144  
VIC13277 EPI\_ISL\_641299  
VIC13278 EPI\_ISL\_592223  
VIC13279 EPI\_ISL\_563649  
VIC1328 EPI\_ISL\_430695  
VIC13281 EPI\_ISL\_640503  
VIC13282 EPI\_ISL\_563650  
VIC13283 EPI\_ISL\_563651  
VIC13284 EPI\_ISL\_563652  
VIC13286 EPI\_ISL\_563653  
VIC13288 EPI\_ISL\_592224  
VIC13289 EPI\_ISL\_561900  
VIC1329 EPI\_ISL\_430696  
VIC13290 EPI\_ISL\_592225  
VIC13291 EPI\_ISL\_561875  
VIC13293 EPI\_ISL\_563654  
VIC13295 EPI\_ISL\_563655  
VIC13296 EPI\_ISL\_563656  
VIC13297 EPI\_ISL\_563657

VIC13300 EPI\_ISL\_563659  
VIC13301 EPI\_ISL\_563660  
VIC13303 EPI\_ISL\_563661  
VIC13306 EPI\_ISL\_563662  
VIC13307 EPI\_ISL\_563663  
VIC13309 EPI\_ISL\_562090  
VIC13310 EPI\_ISL\_592226  
VIC13311 EPI\_ISL\_561761  
VIC13312 EPI\_ISL\_563664  
VIC13313 EPI\_ISL\_563665  
VIC13314 EPI\_ISL\_563666  
VIC13316 EPI\_ISL\_563667  
VIC13317 EPI\_ISL\_563668  
VIC13318 EPI\_ISL\_563669  
VIC13319 EPI\_ISL\_563670  
VIC13320 EPI\_ISL\_563671  
VIC13321 EPI\_ISL\_563672  
VIC13323 EPI\_ISL\_561897  
VIC13324 EPI\_ISL\_592227  
VIC13325 EPI\_ISL\_563673  
VIC13326 EPI\_ISL\_563674  
VIC13327 EPI\_ISL\_563675  
VIC13329 EPI\_ISL\_563676  
VIC13330 EPI\_ISL\_563677  
VIC13331 EPI\_ISL\_563678  
VIC13332 EPI\_ISL\_563679  
VIC13334 EPI\_ISL\_563680  
VIC13335 EPI\_ISL\_592228  
VIC13336 EPI\_ISL\_563681  
VIC13337 EPI\_ISL\_563682  
VIC13340 EPI\_ISL\_563683  
VIC13341 EPI\_ISL\_563684  
VIC13342 EPI\_ISL\_561898  
VIC13344 EPI\_ISL\_563685  
VIC13345 EPI\_ISL\_592229  
VIC13347 EPI\_ISL\_563686  
VIC13349 EPI\_ISL\_592230  
VIC13350 EPI\_ISL\_563687  
VIC13351 EPI\_ISL\_561730  
VIC13352 EPI\_ISL\_563688  
VIC13353 EPI\_ISL\_563689  
VIC13355 EPI\_ISL\_563691  
VIC13356 EPI\_ISL\_563692  
VIC13357 EPI\_ISL\_592231  
VIC1336 EPI\_ISL\_430698  
VIC13362 EPI\_ISL\_592232  
VIC13365 EPI\_ISL\_563693  
VIC13366 EPI\_ISL\_561815  
VIC13367 EPI\_ISL\_563694  
VIC13368 EPI\_ISL\_562647  
VIC13369 EPI\_ISL\_563695  
VIC13370 EPI\_ISL\_563696

VIC13371 EPI\_ISL\_563697  
VIC13373 EPI\_ISL\_563698  
VIC13374 EPI\_ISL\_563699  
VIC13375 EPI\_ISL\_563700  
VIC13376 EPI\_ISL\_563701  
VIC13377 EPI\_ISL\_563702  
VIC13378 EPI\_ISL\_561857  
VIC13379 EPI\_ISL\_563703  
VIC1338 EPI\_ISL\_430706  
VIC13380 EPI\_ISL\_563704  
VIC13382 EPI\_ISL\_563705  
VIC13383 EPI\_ISL\_563706  
VIC13384 EPI\_ISL\_563707  
VIC13385 EPI\_ISL\_592233  
VIC13386 EPI\_ISL\_563708  
VIC13387 EPI\_ISL\_563709  
VIC13388 EPI\_ISL\_563710  
VIC13389 EPI\_ISL\_563711  
VIC13392 EPI\_ISL\_563712  
VIC13393 EPI\_ISL\_563713  
VIC13395 EPI\_ISL\_592234  
VIC13397 EPI\_ISL\_563714  
VIC13399 EPI\_ISL\_563715  
VIC134 EPI\_ISL\_419827  
VIC13400 EPI\_ISL\_563716  
VIC13401 EPI\_ISL\_563717  
VIC13402 EPI\_ISL\_562755  
VIC13403 EPI\_ISL\_563718  
VIC13404 EPI\_ISL\_563719  
VIC13406 EPI\_ISL\_563720  
VIC13410 EPI\_ISL\_563721  
VIC13418 EPI\_ISL\_561682  
VIC13419 EPI\_ISL\_563723  
VIC13421 EPI\_ISL\_563724  
VIC13422 EPI\_ISL\_561740  
VIC13423 EPI\_ISL\_563725  
VIC13424 EPI\_ISL\_563726  
VIC13425 EPI\_ISL\_563727  
VIC13429 EPI\_ISL\_563728  
VIC13430 EPI\_ISL\_591604  
VIC13431 EPI\_ISL\_563729  
VIC13432 EPI\_ISL\_563730  
VIC13433 EPI\_ISL\_563731  
VIC13434 EPI\_ISL\_592236  
VIC13435 Rejected  
VIC13436 EPI\_ISL\_563732  
VIC13437 EPI\_ISL\_563733  
VIC13438 EPI\_ISL\_592237  
VIC13439 EPI\_ISL\_563734  
VIC1344 EPI\_ISL\_430697  
VIC13440 EPI\_ISL\_592238  
VIC13441 EPI\_ISL\_592239

VIC13442 EPI\_ISL\_592240  
VIC13443 EPI\_ISL\_592241  
VIC13445 EPI\_ISL\_561754  
VIC13446 EPI\_ISL\_563735  
VIC13449 Rejected  
VIC1345 EPI\_ISL\_430708  
VIC13450 EPI\_ISL\_561901  
VIC13451 EPI\_ISL\_592242  
VIC13452 EPI\_ISL\_592243  
VIC13456 Rejected  
VIC13460 Rejected  
VIC13461 EPI\_ISL\_563737  
VIC13465 EPI\_ISL\_592244  
VIC13466 EPI\_ISL\_592245  
VIC13467 EPI\_ISL\_592246  
VIC13468 EPI\_ISL\_592247  
VIC13469 EPI\_ISL\_592248  
VIC13470 EPI\_ISL\_592249  
VIC13471 EPI\_ISL\_591612  
VIC13472 EPI\_ISL\_592250  
VIC13474 EPI\_ISL\_591677  
VIC13475 EPI\_ISL\_592251  
VIC13476 EPI\_ISL\_592252  
VIC13477 EPI\_ISL\_592253  
VIC13478 EPI\_ISL\_592254  
VIC13479 EPI\_ISL\_592255  
VIC13480 EPI\_ISL\_592256  
VIC13481 EPI\_ISL\_592257  
VIC13482 EPI\_ISL\_592258  
VIC13483 EPI\_ISL\_591641  
VIC13484 EPI\_ISL\_592259  
VIC13485 EPI\_ISL\_592260  
VIC13487 EPI\_ISL\_592261  
VIC13488 EPI\_ISL\_592262  
VIC13489 EPI\_ISL\_592263  
VIC13491 EPI\_ISL\_592264  
VIC13492 EPI\_ISL\_592265  
VIC13493 EPI\_ISL\_592266  
VIC13494 EPI\_ISL\_592267  
VIC13496 EPI\_ISL\_592268  
VIC13497 EPI\_ISL\_592269  
VIC13498 EPI\_ISL\_591813  
VIC13499 EPI\_ISL\_592270  
VIC135 EPI\_ISL\_419828  
VIC13500 EPI\_ISL\_592271  
VIC13501 EPI\_ISL\_592272  
VIC13502 EPI\_ISL\_592273  
VIC13503 EPI\_ISL\_592274  
VIC13504 EPI\_ISL\_592275  
VIC13505 EPI\_ISL\_592276  
VIC13506 EPI\_ISL\_592277  
VIC13507 EPI\_ISL\_591716

VIC13508 EPI\_ISL\_591697  
VIC13509 EPI\_ISL\_592278  
VIC13510 EPI\_ISL\_592279  
VIC13511 EPI\_ISL\_592280  
VIC13512 EPI\_ISL\_591650  
VIC13513 EPI\_ISL\_592281  
VIC13514 EPI\_ISL\_591576  
VIC13516 EPI\_ISL\_591586  
VIC13517 EPI\_ISL\_592282  
VIC13519 EPI\_ISL\_592283  
VIC13521 EPI\_ISL\_603040  
VIC13523 EPI\_ISL\_592285  
VIC13524 EPI\_ISL\_592286  
VIC13525 EPI\_ISL\_592287  
VIC13528 EPI\_ISL\_592288  
VIC13529 Rejected  
VIC13531 EPI\_ISL\_591675  
VIC13532 EPI\_ISL\_592289  
VIC13533 EPI\_ISL\_591801  
VIC13535 EPI\_ISL\_563739  
VIC13536 EPI\_ISL\_563740  
VIC13538 EPI\_ISL\_563741  
VIC13540 EPI\_ISL\_563742  
VIC13541 EPI\_ISL\_561642  
VIC13542 EPI\_ISL\_563743  
VIC13545 EPI\_ISL\_563744  
VIC13547 EPI\_ISL\_563745  
VIC13548 EPI\_ISL\_563746  
VIC13549 EPI\_ISL\_563747  
VIC1355 EPI\_ISL\_430638  
VIC13551 EPI\_ISL\_563748  
VIC13552 EPI\_ISL\_563749  
VIC13553 EPI\_ISL\_563750  
VIC13554 EPI\_ISL\_563751  
VIC13555 EPI\_ISL\_561738  
VIC13556 EPI\_ISL\_563752  
VIC13558 EPI\_ISL\_563753  
VIC13559 EPI\_ISL\_563754  
VIC13563 EPI\_ISL\_563755  
VIC13564 EPI\_ISL\_561635  
VIC13565 EPI\_ISL\_563756  
VIC13566 EPI\_ISL\_563757  
VIC13568 EPI\_ISL\_594147  
VIC13569 EPI\_ISL\_563758  
VIC13570 EPI\_ISL\_563759  
VIC13571 EPI\_ISL\_562168  
VIC13572 EPI\_ISL\_563760  
VIC13573 EPI\_ISL\_563761  
VIC13575 EPI\_ISL\_563762  
VIC13576 EPI\_ISL\_563763  
VIC13581 EPI\_ISL\_563764  
VIC13582 EPI\_ISL\_563765



VIC13583 EPI\_ISL\_563766  
VIC13585 EPI\_ISL\_563767  
VIC13586 EPI\_ISL\_563768  
VIC13587 EPI\_ISL\_563769  
VIC1359 EPI\_ISL\_456410  
VIC13590 EPI\_ISL\_561576  
VIC13591 EPI\_ISL\_563770  
VIC13593 EPI\_ISL\_563771  
VIC13594 EPI\_ISL\_563772  
VIC13595 EPI\_ISL\_563773  
VIC13596 EPI\_ISL\_563774  
VIC13599 EPI\_ISL\_563775  
VIC136 EPI\_ISL\_419829  
VIC1360 EPI\_ISL\_456427  
VIC13600 EPI\_ISL\_563776  
VIC13601 EPI\_ISL\_563777  
VIC13602 EPI\_ISL\_563778  
VIC13603 EPI\_ISL\_563779  
VIC13604 EPI\_ISL\_563780  
VIC13606 EPI\_ISL\_563781  
VIC13607 EPI\_ISL\_563782  
VIC13608 EPI\_ISL\_563783  
VIC13611 EPI\_ISL\_563784  
VIC13613 EPI\_ISL\_563785  
VIC13614 EPI\_ISL\_592290  
VIC13617 EPI\_ISL\_563786  
VIC13618 EPI\_ISL\_592291  
VIC13619 EPI\_ISL\_563787  
VIC13620 EPI\_ISL\_591678  
VIC13621 EPI\_ISL\_562618  
VIC13622 EPI\_ISL\_563788  
VIC13624 EPI\_ISL\_563789  
VIC13628 EPI\_ISL\_561493  
VIC13629 EPI\_ISL\_592292  
VIC13630 EPI\_ISL\_1061399  
VIC13631 EPI\_ISL\_563790  
VIC13633 EPI\_ISL\_592293  
VIC13634 EPI\_ISL\_1061400  
VIC13635 EPI\_ISL\_563791  
VIC13637 EPI\_ISL\_592294  
VIC13639 EPI\_ISL\_563792  
VIC13641 EPI\_ISL\_563793  
VIC13642 EPI\_ISL\_563794  
VIC13645 EPI\_ISL\_562619  
VIC13648 EPI\_ISL\_563795  
VIC1365 EPI\_ISL\_456411  
VIC13650 Rejected  
VIC13652 EPI\_ISL\_563796  
VIC13653 EPI\_ISL\_562648  
VIC13654 EPI\_ISL\_563797  
VIC13655 EPI\_ISL\_563798  
VIC13656 EPI\_ISL\_563799

VIC13658 EPI\_ISL\_563800  
VIC13660 EPI\_ISL\_563801  
VIC13665 EPI\_ISL\_562029  
VIC13666 EPI\_ISL\_562649  
VIC13668 EPI\_ISL\_563802  
VIC13669 EPI\_ISL\_563803  
VIC13670 EPI\_ISL\_563804  
VIC13671 EPI\_ISL\_563805  
VIC13672 EPI\_ISL\_561844  
VIC13673 EPI\_ISL\_563806  
VIC13674 EPI\_ISL\_563807  
VIC13675 EPI\_ISL\_561571  
VIC13680 Rejected  
VIC13682 EPI\_ISL\_591632  
VIC13683 EPI\_ISL\_592295  
VIC13684 EPI\_ISL\_592296  
VIC13687 EPI\_ISL\_592297  
VIC13690 EPI\_ISL\_592299  
VIC13691 EPI\_ISL\_592300  
VIC13692 EPI\_ISL\_592301  
VIC13693 EPI\_ISL\_592302  
VIC13694 EPI\_ISL\_592303  
VIC13695 EPI\_ISL\_592304  
VIC13696 EPI\_ISL\_591683  
VIC13697 EPI\_ISL\_592305  
VIC13698 EPI\_ISL\_592306  
VIC13699 EPI\_ISL\_563809  
VIC137 EPI\_ISL\_419830  
VIC13700 EPI\_ISL\_563810  
VIC13705 EPI\_ISL\_563811  
VIC13708 EPI\_ISL\_563812  
VIC13709 EPI\_ISL\_562098  
VIC13714 EPI\_ISL\_563813  
VIC13715 EPI\_ISL\_563814  
VIC13716 EPI\_ISL\_561476  
VIC13717 EPI\_ISL\_563815  
VIC13719 EPI\_ISL\_562650  
VIC1372 EPI\_ISL\_456414  
VIC13720 EPI\_ISL\_563816  
VIC13721 EPI\_ISL\_592308  
VIC13723 EPI\_ISL\_592309  
VIC13724 EPI\_ISL\_592310  
VIC13725 EPI\_ISL\_561983  
VIC13728 EPI\_ISL\_563817  
VIC1373 EPI\_ISL\_456415  
VIC13732 EPI\_ISL\_562131  
VIC13734 EPI\_ISL\_563818  
VIC13735 EPI\_ISL\_592311  
VIC13737 EPI\_ISL\_561427  
VIC13738 EPI\_ISL\_563819  
VIC13739 EPI\_ISL\_592312  
VIC13740 EPI\_ISL\_592313

VIC13741 EPI\_ISL\_563820  
VIC13743 EPI\_ISL\_563821  
VIC13744 EPI\_ISL\_563822  
VIC13746 EPI\_ISL\_592314  
VIC13747 EPI\_ISL\_562756  
VIC13748 EPI\_ISL\_563823  
VIC1375 EPI\_ISL\_456416  
VIC13750 EPI\_ISL\_591637  
VIC13751 EPI\_ISL\_563824  
VIC13753 EPI\_ISL\_563825  
VIC13754 EPI\_ISL\_562010  
VIC13755 EPI\_ISL\_563826  
VIC13757 EPI\_ISL\_563827  
VIC13760 EPI\_ISL\_562651  
VIC13762 EPI\_ISL\_563828  
VIC13764 EPI\_ISL\_563829  
VIC13766 EPI\_ISL\_562652  
VIC13768 EPI\_ISL\_561552  
VIC13769 EPI\_ISL\_563830  
VIC13770 EPI\_ISL\_562060  
VIC13771 EPI\_ISL\_561736  
VIC13772 EPI\_ISL\_562621  
VIC13773 EPI\_ISL\_561667  
VIC13774 EPI\_ISL\_563831  
VIC13775 EPI\_ISL\_591630  
VIC13776 EPI\_ISL\_562653  
VIC13777 EPI\_ISL\_563832  
VIC1378 EPI\_ISL\_456417  
VIC13780 EPI\_ISL\_563833  
VIC13782 EPI\_ISL\_563834  
VIC13784 EPI\_ISL\_563835  
VIC13786 EPI\_ISL\_563836  
VIC13787 EPI\_ISL\_563837  
VIC13788 EPI\_ISL\_563838  
VIC13789 EPI\_ISL\_563839  
VIC1379 EPI\_ISL\_521870  
VIC13792 EPI\_ISL\_591617  
VIC13793 EPI\_ISL\_591636  
VIC13794 EPI\_ISL\_592315  
VIC13796 EPI\_ISL\_592316  
VIC13797 EPI\_ISL\_592317  
VIC13798 EPI\_ISL\_592318  
VIC13799 EPI\_ISL\_591569  
VIC138 EPI\_ISL\_419834  
VIC13802 EPI\_ISL\_592319  
VIC13803 EPI\_ISL\_591664  
VIC13804 EPI\_ISL\_592320  
VIC13805 EPI\_ISL\_592321  
VIC13806 EPI\_ISL\_592322  
VIC13807 EPI\_ISL\_1055307  
VIC13808 EPI\_ISL\_592323  
VIC13809 EPI\_ISL\_592324

VIC13811 EPI\_ISL\_591686  
VIC13812 EPI\_ISL\_592325  
VIC13813 EPI\_ISL\_561989  
VIC13814 EPI\_ISL\_561452  
VIC13815 EPI\_ISL\_592326  
VIC13818 EPI\_ISL\_592327  
VIC1382 EPI\_ISL\_456419  
VIC13820 EPI\_ISL\_561417  
VIC13822 EPI\_ISL\_563842  
VIC13824 EPI\_ISL\_563843  
VIC13825 EPI\_ISL\_563844  
VIC13826 EPI\_ISL\_563845  
VIC13828 EPI\_ISL\_563846  
VIC13829 EPI\_ISL\_563847  
VIC13831 EPI\_ISL\_563848  
VIC13832 EPI\_ISL\_592328  
VIC13833 EPI\_ISL\_591714  
VIC13834 EPI\_ISL\_563849  
VIC13835 EPI\_ISL\_563850  
VIC13836 EPI\_ISL\_562065  
VIC13838 EPI\_ISL\_563851  
VIC13839 EPI\_ISL\_592329  
VIC13840 EPI\_ISL\_592330  
VIC13841 EPI\_ISL\_563852  
VIC13842 EPI\_ISL\_592331  
VIC13844 EPI\_ISL\_591607  
VIC13845 EPI\_ISL\_563853  
VIC13846 EPI\_ISL\_594143  
VIC13847 EPI\_ISL\_592332  
VIC13849 EPI\_ISL\_562092  
VIC13851 EPI\_ISL\_563854  
VIC13852 EPI\_ISL\_563855  
VIC13853 EPI\_ISL\_563856  
VIC13854 EPI\_ISL\_561984  
VIC13857 EPI\_ISL\_563857  
VIC13858 EPI\_ISL\_562128  
VIC1386 EPI\_ISL\_521871  
VIC13862 EPI\_ISL\_591711  
VIC13863 EPI\_ISL\_592333  
VIC13864 EPI\_ISL\_591802  
VIC13865 EPI\_ISL\_592334  
VIC13866 EPI\_ISL\_561744  
VIC13867 EPI\_ISL\_563858  
VIC13868 EPI\_ISL\_561985  
VIC13869 EPI\_ISL\_563859  
VIC13870 EPI\_ISL\_563860  
VIC13871 EPI\_ISL\_563861  
VIC13872 EPI\_ISL\_592335  
VIC13874 EPI\_ISL\_592336  
VIC13875 EPI\_ISL\_592337  
VIC13876 EPI\_ISL\_592338  
VIC13878 EPI\_ISL\_563862

VIC13880 EPI\_ISL\_561843  
VIC13881 EPI\_ISL\_563863  
VIC13884 EPI\_ISL\_592339  
VIC13885 EPI\_ISL\_562105  
VIC13887 EPI\_ISL\_592340  
VIC13888 EPI\_ISL\_563864  
VIC13889 EPI\_ISL\_563865  
VIC13890 EPI\_ISL\_591680  
VIC13891 EPI\_ISL\_563867  
VIC13892 EPI\_ISL\_562725  
VIC13894 EPI\_ISL\_563868  
VIC13895 EPI\_ISL\_563869  
VIC13896 EPI\_ISL\_563870  
VIC13898 EPI\_ISL\_563871  
VIC139 EPI\_ISL\_419836  
VIC13900 EPI\_ISL\_563872  
VIC13901 EPI\_ISL\_563873  
VIC13902 EPI\_ISL\_563874  
VIC13903 EPI\_ISL\_563875  
VIC13904 EPI\_ISL\_563876  
VIC13905 EPI\_ISL\_563877  
VIC13907 EPI\_ISL\_561929  
VIC13908 EPI\_ISL\_563878  
VIC13910 EPI\_ISL\_563879  
VIC13911 EPI\_ISL\_563880  
VIC13913 EPI\_ISL\_591702  
VIC13918 EPI\_ISL\_563881  
VIC13919 EPI\_ISL\_563882  
VIC1392 EPI\_ISL\_456425  
VIC13922 EPI\_ISL\_562151  
VIC13924 EPI\_ISL\_561926  
VIC13925 EPI\_ISL\_562654  
VIC13926 EPI\_ISL\_563884  
VIC13927 EPI\_ISL\_591710  
VIC13928 EPI\_ISL\_562655  
VIC13937 EPI\_ISL\_563885  
VIC13940 EPI\_ISL\_563886  
VIC13941 EPI\_ISL\_562126  
VIC13942 EPI\_ISL\_563887  
VIC13943 EPI\_ISL\_561757  
VIC13946 EPI\_ISL\_561691  
VIC13947 EPI\_ISL\_563888  
VIC13948 EPI\_ISL\_563889  
VIC13950 EPI\_ISL\_563890  
VIC13952 EPI\_ISL\_563891  
VIC13953 EPI\_ISL\_561826  
VIC13955 EPI\_ISL\_562099  
VIC13956 EPI\_ISL\_563892  
VIC13958 EPI\_ISL\_561710  
VIC13962 EPI\_ISL\_563895  
VIC13963 EPI\_ISL\_563896  
VIC13964 EPI\_ISL\_563897

VIC13965 EPI\_ISL\_563898  
VIC13966 EPI\_ISL\_563899  
VIC13967 EPI\_ISL\_563900  
VIC13968 EPI\_ISL\_563901  
VIC13969 EPI\_ISL\_563902  
VIC13970 EPI\_ISL\_561996  
VIC13971 EPI\_ISL\_563903  
VIC13973 EPI\_ISL\_561973  
VIC13975 EPI\_ISL\_563904  
VIC13977 EPI\_ISL\_563905  
VIC13980 EPI\_ISL\_563906  
VIC13982 EPI\_ISL\_563908  
VIC13984 EPI\_ISL\_563909  
VIC13985 EPI\_ISL\_561467  
VIC13987 EPI\_ISL\_563910  
VIC13988 EPI\_ISL\_563911  
VIC13989 EPI\_ISL\_563912  
VIC13990 EPI\_ISL\_563913  
VIC13991 EPI\_ISL\_561811  
VIC13992 EPI\_ISL\_563914  
VIC13993 EPI\_ISL\_563915  
VIC13995 EPI\_ISL\_563916  
VIC13996 EPI\_ISL\_594146  
VIC13997 EPI\_ISL\_563917  
VIC13999 EPI\_ISL\_563918  
VIC14 EPI\_ISL\_419734  
VIC140 EPI\_ISL\_419837  
VIC14001 EPI\_ISL\_563919  
VIC14002 EPI\_ISL\_563920  
VIC14004 EPI\_ISL\_563921  
VIC14006 EPI\_ISL\_563922  
VIC14007 EPI\_ISL\_562656  
VIC14008 EPI\_ISL\_563923  
VIC14009 EPI\_ISL\_563924  
VIC14010 EPI\_ISL\_563926  
VIC14011 EPI\_ISL\_563927  
VIC14013 EPI\_ISL\_563928  
VIC14015 EPI\_ISL\_563930  
VIC14016 EPI\_ISL\_561670  
VIC14018 EPI\_ISL\_563932  
VIC14020 EPI\_ISL\_563933  
VIC14025 EPI\_ISL\_563935  
VIC14026 EPI\_ISL\_563936  
VIC14027 EPI\_ISL\_563937  
VIC14028 EPI\_ISL\_561466  
VIC14033 EPI\_ISL\_591589  
VIC14034 EPI\_ISL\_563939  
VIC14035 EPI\_ISL\_562740  
VIC14036 EPI\_ISL\_592342  
VIC14037 EPI\_ISL\_563940  
VIC14038 EPI\_ISL\_562032  
VIC14039 EPI\_ISL\_562622

VIC1404 EPI\_ISL\_456422  
VIC14040 EPI\_ISL\_563941  
VIC14041 EPI\_ISL\_563942  
VIC14042 EPI\_ISL\_563943  
VIC14045 EPI\_ISL\_563944  
VIC14046 EPI\_ISL\_561902  
VIC14047 EPI\_ISL\_563945  
VIC14048 EPI\_ISL\_563946  
VIC14056 EPI\_ISL\_563947  
VIC14057 EPI\_ISL\_563948  
VIC14058 EPI\_ISL\_563949  
VIC1406 EPI\_ISL\_456423  
VIC14060 EPI\_ISL\_563950  
VIC14061 EPI\_ISL\_563951  
VIC14062 EPI\_ISL\_561607  
VIC14063 EPI\_ISL\_563952  
VIC14064 EPI\_ISL\_591794  
VIC14065 EPI\_ISL\_562657  
VIC14066 EPI\_ISL\_592343  
VIC14068 EPI\_ISL\_563953  
VIC14070 EPI\_ISL\_562741  
VIC14074 EPI\_ISL\_563956  
VIC14075 EPI\_ISL\_563957  
VIC14076 EPI\_ISL\_592344  
VIC14077 EPI\_ISL\_561447  
VIC14078 EPI\_ISL\_592345  
VIC14079 EPI\_ISL\_563958  
VIC1408 EPI\_ISL\_456426  
VIC14080 EPI\_ISL\_563959  
VIC14081 EPI\_ISL\_563960  
VIC14082 EPI\_ISL\_561812  
VIC14083 EPI\_ISL\_563961  
VIC14085 EPI\_ISL\_563962  
VIC14086 EPI\_ISL\_563963  
VIC14087 EPI\_ISL\_563964  
VIC1409 EPI\_ISL\_456428  
VIC14091 EPI\_ISL\_561608  
VIC14094 EPI\_ISL\_562006  
VIC14095 EPI\_ISL\_561463  
VIC14096 EPI\_ISL\_561484  
VIC14097 EPI\_ISL\_562726  
VIC14098 EPI\_ISL\_561439  
VIC141 EPI\_ISL\_419838  
VIC1410 EPI\_ISL\_456429  
VIC14100 EPI\_ISL\_563965  
VIC14101 EPI\_ISL\_563966  
VIC14102 EPI\_ISL\_563967  
VIC14103 EPI\_ISL\_563968  
VIC14104 EPI\_ISL\_563969  
VIC14106 EPI\_ISL\_563970  
VIC14108 EPI\_ISL\_561965  
VIC14109 EPI\_ISL\_563971

VIC14110 EPI\_ISL\_563972  
VIC14112 EPI\_ISL\_561495  
VIC14114 EPI\_ISL\_563973  
VIC14115 EPI\_ISL\_563974  
VIC14116 EPI\_ISL\_563975  
VIC14117 EPI\_ISL\_563976  
VIC14118 EPI\_ISL\_592346  
VIC14119 EPI\_ISL\_591814  
VIC1412 EPI\_ISL\_456431  
VIC14120 EPI\_ISL\_603048  
VIC14122 EPI\_ISL\_592347  
VIC14124 EPI\_ISL\_591668  
VIC14127 Rejected  
VIC14128 EPI\_ISL\_592348  
VIC1413 EPI\_ISL\_456434  
VIC14130 EPI\_ISL\_592349  
VIC14132 EPI\_ISL\_592350  
VIC14134 EPI\_ISL\_591795  
VIC14137 Rejected  
VIC14138 EPI\_ISL\_592351  
VIC14139 EPI\_ISL\_591582  
VIC14141 EPI\_ISL\_591815  
VIC14142 Rejected  
VIC14144 Rejected  
VIC14145 EPI\_ISL\_591819  
VIC14146 EPI\_ISL\_591646  
VIC14148 EPI\_ISL\_591820  
VIC14149 EPI\_ISL\_592352  
VIC14150 EPI\_ISL\_592353  
VIC14151 EPI\_ISL\_592354  
VIC14154 EPI\_ISL\_592355  
VIC14155 EPI\_ISL\_592356  
VIC14157 EPI\_ISL\_592357  
VIC14158 EPI\_ISL\_592358  
VIC14160 EPI\_ISL\_592359  
VIC14161 EPI\_ISL\_592360  
VIC14162 EPI\_ISL\_592361  
VIC14163 EPI\_ISL\_592362  
VIC14165 EPI\_ISL\_592363  
VIC14168 EPI\_ISL\_592364  
VIC14170 EPI\_ISL\_592365  
VIC14171 EPI\_ISL\_592366  
VIC14172 EPI\_ISL\_592367  
VIC14175 EPI\_ISL\_592368  
VIC14176 EPI\_ISL\_592369  
VIC14177 EPI\_ISL\_592370  
VIC14179 EPI\_ISL\_592371  
VIC14182 EPI\_ISL\_592372  
VIC14183 EPI\_ISL\_592373  
VIC14184 EPI\_ISL\_592374  
VIC14185 EPI\_ISL\_592375  
VIC14186 EPI\_ISL\_592376



VIC14188 EPI\_ISL\_592377  
VIC14190 EPI\_ISL\_592378  
VIC14192 EPI\_ISL\_592379  
VIC14193 EPI\_ISL\_592380  
VIC14194 EPI\_ISL\_592381  
VIC14195 EPI\_ISL\_592382  
VIC14196 EPI\_ISL\_591676  
VIC14198 EPI\_ISL\_592383  
VIC142 EPI\_ISL\_419839  
VIC14200 EPI\_ISL\_592384  
VIC14201 EPI\_ISL\_592385  
VIC14202 EPI\_ISL\_592386  
VIC14203 EPI\_ISL\_592387  
VIC14204 EPI\_ISL\_591620  
VIC14206 EPI\_ISL\_592388  
VIC14207 EPI\_ISL\_592389  
VIC14208 EPI\_ISL\_591633  
VIC14209 EPI\_ISL\_592390  
VIC14210 EPI\_ISL\_592391  
VIC14211 EPI\_ISL\_592392  
VIC14212 EPI\_ISL\_591717  
VIC14213 EPI\_ISL\_592393  
VIC14214 EPI\_ISL\_592394  
VIC14216 EPI\_ISL\_591588  
VIC14217 EPI\_ISL\_592395  
VIC14218 EPI\_ISL\_592396  
VIC14219 EPI\_ISL\_592397  
VIC14222 EPI\_ISL\_592398  
VIC14223 EPI\_ISL\_592399  
VIC14224 EPI\_ISL\_592400  
VIC14225 EPI\_ISL\_592401  
VIC14227 EPI\_ISL\_592402  
VIC14230 EPI\_ISL\_592403  
VIC14231 EPI\_ISL\_592404  
VIC14232 EPI\_ISL\_592405  
VIC14233 EPI\_ISL\_591709  
VIC14234 EPI\_ISL\_592406  
VIC14235 EPI\_ISL\_592407  
VIC14238 EPI\_ISL\_592408  
VIC14239 EPI\_ISL\_592409  
VIC14240 EPI\_ISL\_591572  
VIC14241 EPI\_ISL\_592410  
VIC14242 EPI\_ISL\_591593  
VIC14243 EPI\_ISL\_592411  
VIC14244 EPI\_ISL\_592412  
VIC14245 EPI\_ISL\_592413  
VIC14246 EPI\_ISL\_592414  
VIC14247 EPI\_ISL\_592415  
VIC14248 EPI\_ISL\_592416  
VIC14249 EPI\_ISL\_592417  
VIC14250 EPI\_ISL\_591821  
VIC14251 EPI\_ISL\_592418

VIC14253 EPI\_ISL\_591639  
VIC14254 EPI\_ISL\_592419  
VIC14255 EPI\_ISL\_592420  
VIC14257 EPI\_ISL\_592421  
VIC14258 EPI\_ISL\_592422  
VIC14261 EPI\_ISL\_591660  
VIC14262 EPI\_ISL\_592423  
VIC14263 EPI\_ISL\_592424  
VIC14264 EPI\_ISL\_592425  
VIC14265 EPI\_ISL\_592426  
VIC14266 EPI\_ISL\_592427  
VIC14267 EPI\_ISL\_591634  
VIC14270 EPI\_ISL\_591631  
VIC14271 EPI\_ISL\_591803  
VIC14272 EPI\_ISL\_592428  
VIC14273 EPI\_ISL\_591635  
VIC14274 EPI\_ISL\_591665  
VIC14275 EPI\_ISL\_591614  
VIC14276 EPI\_ISL\_592429  
VIC14279 EPI\_ISL\_592430  
VIC1428 EPI\_ISL\_456435  
VIC14280 EPI\_ISL\_592431  
VIC14282 EPI\_ISL\_592432  
VIC14283 EPI\_ISL\_592433  
VIC14284 EPI\_ISL\_592434  
VIC14285 EPI\_ISL\_592435  
VIC14286 EPI\_ISL\_591804  
VIC14287 EPI\_ISL\_592436  
VIC14290 EPI\_ISL\_592437  
VIC14292 EPI\_ISL\_592438  
VIC14294 EPI\_ISL\_592439  
VIC14296 EPI\_ISL\_592440  
VIC14298 EPI\_ISL\_592441  
VIC14299 EPI\_ISL\_592442  
VIC143 EPI\_ISL\_419840  
VIC14300 EPI\_ISL\_592443  
VIC14302 EPI\_ISL\_591644  
VIC14304 EPI\_ISL\_591651  
VIC14305 Rejected  
VIC14306 EPI\_ISL\_592444  
VIC14308 EPI\_ISL\_592445  
VIC1431 EPI\_ISL\_456438  
VIC14312 EPI\_ISL\_592446  
VIC14313 EPI\_ISL\_591718  
VIC14315 EPI\_ISL\_592447  
VIC14316 EPI\_ISL\_592448  
VIC14320 EPI\_ISL\_592449  
VIC14323 EPI\_ISL\_592450  
VIC14326 EPI\_ISL\_591806  
VIC14327 EPI\_ISL\_592451  
VIC14328 EPI\_ISL\_591816  
VIC14329 EPI\_ISL\_592452

VIC1433 EPI\_ISL\_456440  
VIC14331 EPI\_ISL\_592453  
VIC14332 EPI\_ISL\_592454  
VIC14335 EPI\_ISL\_592455  
VIC14336 EPI\_ISL\_592456  
VIC14337 EPI\_ISL\_591823  
VIC14338 EPI\_ISL\_592457  
VIC14340 EPI\_ISL\_591808  
VIC14341 EPI\_ISL\_591796  
VIC14342 EPI\_ISL\_591625  
VIC14343 EPI\_ISL\_592458  
VIC14344 EPI\_ISL\_592459  
VIC14345 EPI\_ISL\_591616  
VIC14347 EPI\_ISL\_591817  
VIC14348 EPI\_ISL\_592460  
VIC14349 EPI\_ISL\_592461  
VIC14350 EPI\_ISL\_592462  
VIC14352 EPI\_ISL\_592463  
VIC14353 EPI\_ISL\_592464  
VIC14354 EPI\_ISL\_592465  
VIC14358 EPI\_ISL\_592466  
VIC14359 EPI\_ISL\_592467  
VIC1436 EPI\_ISL\_456441  
VIC14361 EPI\_ISL\_591689  
VIC14362 Rejected  
VIC14365 EPI\_ISL\_592468  
VIC14366 EPI\_ISL\_591807  
VIC14367 EPI\_ISL\_592469  
VIC14368 EPI\_ISL\_592470  
VIC14369 EPI\_ISL\_592471  
VIC14370 Rejected  
VIC14372 EPI\_ISL\_592472  
VIC14373 EPI\_ISL\_592473  
VIC14374 EPI\_ISL\_591691  
VIC14375 Rejected  
VIC14376 EPI\_ISL\_592474  
VIC14377 EPI\_ISL\_592475  
VIC14378 EPI\_ISL\_592476  
VIC14379 EPI\_ISL\_591809  
VIC1438 EPI\_ISL\_456442  
VIC14380 EPI\_ISL\_592477  
VIC14381 EPI\_ISL\_592478  
VIC14382 EPI\_ISL\_591627  
VIC14383 EPI\_ISL\_591642  
VIC14384 EPI\_ISL\_591618  
VIC14385 EPI\_ISL\_592479  
VIC14386 Rejected  
VIC14387 EPI\_ISL\_592480  
VIC14390 EPI\_ISL\_591818  
VIC14392 Rejected  
VIC14396 EPI\_ISL\_592481  
VIC14397 EPI\_ISL\_592482

VIC14398 EPI\_ISL\_592483  
VIC144 EPI\_ISL\_419841  
VIC14404 EPI\_ISL\_592484  
VIC14407 EPI\_ISL\_592486  
VIC14408 EPI\_ISL\_592487  
VIC1441 EPI\_ISL\_456443  
VIC14410 EPI\_ISL\_592488  
VIC14412 EPI\_ISL\_592489  
VIC14415 EPI\_ISL\_592491  
VIC14416 EPI\_ISL\_591825  
VIC14419 EPI\_ISL\_592493  
VIC14420 EPI\_ISL\_592494  
VIC14421 EPI\_ISL\_592495  
VIC14422 EPI\_ISL\_592496  
VIC14424 EPI\_ISL\_592497  
VIC14425 EPI\_ISL\_591669  
VIC14426 EPI\_ISL\_592498  
VIC14428 EPI\_ISL\_592499  
VIC14430 Rejected  
VIC14435 EPI\_ISL\_592500  
VIC14437 EPI\_ISL\_591638  
VIC14441 EPI\_ISL\_592503  
VIC14442 EPI\_ISL\_591708  
VIC14443 EPI\_ISL\_592504  
VIC14448 EPI\_ISL\_592505  
VIC14449 EPI\_ISL\_592506  
VIC14454 EPI\_ISL\_591645  
VIC14474 EPI\_ISL\_592510  
VIC14475 EPI\_ISL\_592511  
VIC14483 EPI\_ISL\_592514  
VIC14488 EPI\_ISL\_592516  
VIC14490 EPI\_ISL\_592517  
VIC14491 EPI\_ISL\_592518  
VIC14492 EPI\_ISL\_592519  
VIC14493 EPI\_ISL\_592520  
VIC14494 EPI\_ISL\_592521  
VIC14496 EPI\_ISL\_592522  
VIC14498 Rejected  
VIC14499 EPI\_ISL\_592523  
VIC145 EPI\_ISL\_419842  
VIC14500 EPI\_ISL\_592524  
VIC14501 EPI\_ISL\_592525  
VIC14502 EPI\_ISL\_592526  
VIC14504 EPI\_ISL\_592527  
VIC14505 EPI\_ISL\_591655  
VIC14506 EPI\_ISL\_592528  
VIC14507 EPI\_ISL\_592529  
VIC14508 EPI\_ISL\_592530  
VIC14509 Rejected  
VIC14510 EPI\_ISL\_1055308  
VIC14511 EPI\_ISL\_592867  
VIC14512 EPI\_ISL\_592868

VIC14513 EPI\_ISL\_592869  
VIC14514 EPI\_ISL\_592870  
VIC14515 EPI\_ISL\_592871  
VIC14516 EPI\_ISL\_592872  
VIC14517 EPI\_ISL\_592873  
VIC14520 EPI\_ISL\_592874  
VIC14521 Rejected  
VIC14522 EPI\_ISL\_592875  
VIC14523 EPI\_ISL\_592876  
VIC14524 EPI\_ISL\_592680  
VIC14525 EPI\_ISL\_592877  
VIC14526 EPI\_ISL\_592639  
VIC14527 EPI\_ISL\_592600  
VIC14529 EPI\_ISL\_592878  
VIC14531 EPI\_ISL\_592879  
VIC14540 EPI\_ISL\_592882  
VIC14541 EPI\_ISL\_592833  
VIC14543 EPI\_ISL\_592883  
VIC14544 EPI\_ISL\_592884  
VIC14545 EPI\_ISL\_592885  
VIC14546 EPI\_ISL\_592886  
VIC14547 EPI\_ISL\_592887  
VIC14549 EPI\_ISL\_592888  
VIC14551 EPI\_ISL\_592889  
VIC14552 EPI\_ISL\_592704  
VIC14555 EPI\_ISL\_592890  
VIC14556 EPI\_ISL\_592891  
VIC14557 EPI\_ISL\_592892  
VIC14558 EPI\_ISL\_592893  
VIC14560 EPI\_ISL\_592834  
VIC14563 EPI\_ISL\_592894  
VIC14564 EPI\_ISL\_592895  
VIC14565 EPI\_ISL\_592896  
VIC14566 EPI\_ISL\_592897  
VIC14567 EPI\_ISL\_592898  
VIC14568 EPI\_ISL\_592899  
VIC14570 EPI\_ISL\_592900  
VIC14572 EPI\_ISL\_592822  
VIC14573 Rejected  
VIC14574 EPI\_ISL\_592901  
VIC14575 EPI\_ISL\_592902  
VIC14576 EPI\_ISL\_592614  
VIC14577 EPI\_ISL\_592903  
VIC1458 EPI\_ISL\_456454  
VIC14580 EPI\_ISL\_592904  
VIC14585 EPI\_ISL\_592905  
VIC14589 EPI\_ISL\_592906  
VIC1459 EPI\_ISL\_456448  
VIC14590 EPI\_ISL\_592907  
VIC14591 EPI\_ISL\_592641  
VIC14592 EPI\_ISL\_592908  
VIC14593 EPI\_ISL\_592909

VIC14594 EPI\_ISL\_592665  
VIC14596 EPI\_ISL\_592910  
VIC14597 EPI\_ISL\_592911  
VIC14598 EPI\_ISL\_592823  
VIC14599 EPI\_ISL\_592596  
VIC146 EPI\_ISL\_419843  
VIC14601 EPI\_ISL\_592857  
VIC14602 EPI\_ISL\_592912  
VIC14604 Rejected  
VIC14605 EPI\_ISL\_592681  
VIC14607 EPI\_ISL\_592913  
VIC14610 EPI\_ISL\_592914  
VIC14611 EPI\_ISL\_592574  
VIC14612 EPI\_ISL\_592915  
VIC14613 EPI\_ISL\_592916  
VIC14614 EPI\_ISL\_592835  
VIC14615 EPI\_ISL\_592917  
VIC14618 EPI\_ISL\_592566  
VIC14620 EPI\_ISL\_592918  
VIC14622 EPI\_ISL\_592919  
VIC14623 EPI\_ISL\_592607  
VIC14624 EPI\_ISL\_592920  
VIC14625 EPI\_ISL\_592921  
VIC14626 EPI\_ISL\_592922  
VIC14627 EPI\_ISL\_592923  
VIC14628 EPI\_ISL\_592924  
VIC1463 EPI\_ISL\_456445  
VIC14630 EPI\_ISL\_592836  
VIC14631 EPI\_ISL\_592925  
VIC14633 EPI\_ISL\_592926  
VIC14637 EPI\_ISL\_592927  
VIC14638 EPI\_ISL\_592928  
VIC1464 EPI\_ISL\_456446  
VIC14640 EPI\_ISL\_592929  
VIC14643 EPI\_ISL\_592930  
VIC14645 EPI\_ISL\_592573  
VIC14646 EPI\_ISL\_592931  
VIC14647 EPI\_ISL\_592932  
VIC14649 EPI\_ISL\_592933  
VIC1465 EPI\_ISL\_456447  
VIC14650 EPI\_ISL\_592934  
VIC14652 EPI\_ISL\_592561  
VIC14653 EPI\_ISL\_592935  
VIC14655 EPI\_ISL\_592936  
VIC14657 EPI\_ISL\_592937  
VIC14658 EPI\_ISL\_592938  
VIC14659 EPI\_ISL\_592837  
VIC14660 EPI\_ISL\_592939  
VIC14661 EPI\_ISL\_592940  
VIC14662 EPI\_ISL\_592941  
VIC14663 EPI\_ISL\_592942  
VIC14664 EPI\_ISL\_592943

VIC14665 EPI\_ISL\_592944  
VIC14667 EPI\_ISL\_592945  
VIC14668 EPI\_ISL\_592838  
VIC14669 EPI\_ISL\_592645  
VIC14670 EPI\_ISL\_592946  
VIC14671 EPI\_ISL\_592947  
VIC14672 EPI\_ISL\_592634  
VIC14673 EPI\_ISL\_592948  
VIC14675 EPI\_ISL\_592949  
VIC14677 EPI\_ISL\_592950  
VIC14679 EPI\_ISL\_592646  
VIC14681 EPI\_ISL\_592951  
VIC14685 EPI\_ISL\_592952  
VIC14686 EPI\_ISL\_592953  
VIC14689 EPI\_ISL\_592954  
VIC14690 EPI\_ISL\_592955  
VIC14692 EPI\_ISL\_592956  
VIC14693 EPI\_ISL\_603044  
VIC14696 EPI\_ISL\_592670  
VIC14698 EPI\_ISL\_592957  
VIC147 EPI\_ISL\_419844  
VIC14703 EPI\_ISL\_592959  
VIC14704 EPI\_ISL\_592960  
VIC14705 EPI\_ISL\_592839  
VIC14706 EPI\_ISL\_592961  
VIC14708 EPI\_ISL\_592962  
VIC14709 EPI\_ISL\_592963  
VIC14712 EPI\_ISL\_592964  
VIC14713 EPI\_ISL\_592965  
VIC14715 EPI\_ISL\_592966  
VIC14717 EPI\_ISL\_592967  
VIC14719 EPI\_ISL\_592968  
VIC14722 EPI\_ISL\_592969  
VIC14724 EPI\_ISL\_592597  
VIC14726 EPI\_ISL\_592824  
VIC14729 EPI\_ISL\_592973  
VIC1473 EPI\_ISL\_456450  
VIC14731 EPI\_ISL\_592974  
VIC14733 EPI\_ISL\_592660  
VIC14735 EPI\_ISL\_592976  
VIC14736 EPI\_ISL\_592581  
VIC14737 EPI\_ISL\_592977  
VIC14738 EPI\_ISL\_592978  
VIC14739 EPI\_ISL\_592661  
VIC14740 EPI\_ISL\_592979  
VIC14741 EPI\_ISL\_592980  
VIC14744 EPI\_ISL\_592981  
VIC14746 EPI\_ISL\_592982  
VIC14747 EPI\_ISL\_592983  
VIC14748 EPI\_ISL\_592984  
VIC14749 EPI\_ISL\_592985  
VIC14750 EPI\_ISL\_592590

VIC14752 EPI\_ISL\_592825  
VIC14756 EPI\_ISL\_592986  
VIC14757 EPI\_ISL\_592987  
VIC14758 EPI\_ISL\_592557  
VIC14759 EPI\_ISL\_592826  
VIC14761 EPI\_ISL\_592676  
VIC14763 EPI\_ISL\_592988  
VIC14764 EPI\_ISL\_592989  
VIC14765 EPI\_ISL\_603046  
VIC14766 EPI\_ISL\_592569  
VIC14767 EPI\_ISL\_592990  
VIC14768 EPI\_ISL\_592991  
VIC14770 EPI\_ISL\_592992  
VIC14773 EPI\_ISL\_592703  
VIC14775 EPI\_ISL\_592993  
VIC14776 EPI\_ISL\_592994  
VIC14778 EPI\_ISL\_592995  
VIC14779 EPI\_ISL\_592996  
VIC14782 EPI\_ISL\_592997  
VIC14784 Rejected  
VIC14785 EPI\_ISL\_663415  
VIC14786 EPI\_ISL\_592998  
VIC14787 EPI\_ISL\_592999  
VIC14789 EPI\_ISL\_593000  
VIC14794 EPI\_ISL\_593001  
VIC14797 EPI\_ISL\_593002  
VIC14799 EPI\_ISL\_593003  
VIC148 EPI\_ISL\_419845  
VIC14801 EPI\_ISL\_592616  
VIC14806 EPI\_ISL\_593005  
VIC14807 EPI\_ISL\_593006  
VIC14809 Rejected  
VIC14810 EPI\_ISL\_592580  
VIC14812 EPI\_ISL\_592691  
VIC14813 EPI\_ISL\_593007  
VIC14814 EPI\_ISL\_593008  
VIC14815 EPI\_ISL\_593009  
VIC14816 EPI\_ISL\_593010  
VIC14817 EPI\_ISL\_592582  
VIC14820 EPI\_ISL\_593011  
VIC14821 EPI\_ISL\_593012  
VIC14824 Rejected  
VIC14825 EPI\_ISL\_593014  
VIC14827 EPI\_ISL\_593016  
VIC14831 Rejected  
VIC14832 EPI\_ISL\_593018  
VIC14834 Rejected  
VIC14835 EPI\_ISL\_593019  
VIC14836 EPI\_ISL\_593020  
VIC14837 EPI\_ISL\_593021  
VIC14838 EPI\_ISL\_593022  
VIC14839 EPI\_ISL\_593023



VIC14840 Rejected  
VIC14841 EPI\_ISL\_593024  
VIC14842 EPI\_ISL\_593025  
VIC14843 EPI\_ISL\_593026  
VIC14844 EPI\_ISL\_593027  
VIC14846 EPI\_ISL\_593028  
VIC14847 EPI\_ISL\_593029  
VIC14849 EPI\_ISL\_593030  
VIC14850 EPI\_ISL\_593031  
VIC14855 Rejected  
VIC14858 EPI\_ISL\_592840  
VIC1486 EPI\_ISL\_456455  
VIC14861 EPI\_ISL\_593033  
VIC14862 EPI\_ISL\_593034  
VIC14865 EPI\_ISL\_593035  
VIC14868 EPI\_ISL\_593036  
VIC14869 EPI\_ISL\_593037  
VIC14874 EPI\_ISL\_593040  
VIC14877 EPI\_ISL\_593041  
VIC14878 EPI\_ISL\_592628  
VIC14879 EPI\_ISL\_593042  
VIC14880 EPI\_ISL\_592571  
VIC14881 EPI\_ISL\_592662  
VIC14884 EPI\_ISL\_593043  
VIC14886 EPI\_ISL\_592617  
VIC14888 EPI\_ISL\_592819  
VIC14889 EPI\_ISL\_593045  
VIC1489 EPI\_ISL\_456456  
VIC14890 Rejected  
VIC14891 EPI\_ISL\_593046  
VIC14892 EPI\_ISL\_593047  
VIC14893 EPI\_ISL\_593048  
VIC14894 EPI\_ISL\_593049  
VIC14895 EPI\_ISL\_593050  
VIC14897 EPI\_ISL\_593051  
VIC14898 EPI\_ISL\_603041  
VIC14899 EPI\_ISL\_592663  
VIC149 EPI\_ISL\_419846  
VIC1490 EPI\_ISL\_456457  
VIC14900 EPI\_ISL\_593052  
VIC14901 EPI\_ISL\_593053  
VIC14902 EPI\_ISL\_593054  
VIC14904 EPI\_ISL\_592841  
VIC14907 EPI\_ISL\_593055  
VIC14909 EPI\_ISL\_593056  
VIC1491 EPI\_ISL\_456463  
VIC14910 EPI\_ISL\_593057  
VIC14911 EPI\_ISL\_593058  
VIC14912 EPI\_ISL\_593059  
VIC14914 EPI\_ISL\_592572  
VIC14918 EPI\_ISL\_592650  
VIC14920 EPI\_ISL\_593060

VIC14923 EPI\_ISL\_593061  
VIC14924 EPI\_ISL\_592656  
VIC14925 EPI\_ISL\_593062  
VIC14926 EPI\_ISL\_593063  
VIC14927 EPI\_ISL\_593064  
VIC14928 EPI\_ISL\_593065  
VIC14929 EPI\_ISL\_592608  
VIC1493 EPI\_ISL\_456471  
VIC14931 EPI\_ISL\_593066  
VIC14932 EPI\_ISL\_593067  
VIC14934 EPI\_ISL\_593068  
VIC14935 EPI\_ISL\_593069  
VIC14937 EPI\_ISL\_593070  
VIC14938 EPI\_ISL\_592570  
VIC14939 EPI\_ISL\_593071  
VIC14942 EPI\_ISL\_593072  
VIC14943 EPI\_ISL\_592651  
VIC14945 EPI\_ISL\_593073  
VIC14946 EPI\_ISL\_592842  
VIC14947 EPI\_ISL\_593074  
VIC14948 EPI\_ISL\_592556  
VIC1495 EPI\_ISL\_456459  
VIC14950 EPI\_ISL\_593075  
VIC14951 EPI\_ISL\_593076  
VIC14953 EPI\_ISL\_593077  
VIC14955 EPI\_ISL\_593078  
VIC14956 EPI\_ISL\_593079  
VIC14957 EPI\_ISL\_593080  
VIC14958 EPI\_ISL\_593081  
VIC14959 EPI\_ISL\_593082  
VIC1496 EPI\_ISL\_456460  
VIC14960 EPI\_ISL\_593083  
VIC14963 EPI\_ISL\_593084  
VIC14965 EPI\_ISL\_593085  
VIC14966 EPI\_ISL\_592604  
VIC14967 EPI\_ISL\_592598  
VIC14969 EPI\_ISL\_592631  
VIC14971 EPI\_ISL\_592666  
VIC14972 EPI\_ISL\_593086  
VIC14975 EPI\_ISL\_593087  
VIC14977 EPI\_ISL\_593088  
VIC14978 EPI\_ISL\_593089  
VIC14979 Rejected  
VIC1498 EPI\_ISL\_456464  
VIC14980 Rejected  
VIC14981 EPI\_ISL\_592618  
VIC14982 EPI\_ISL\_593090  
VIC14983 EPI\_ISL\_593091  
VIC14984 EPI\_ISL\_593092  
VIC14987 EPI\_ISL\_593093  
VIC14989 EPI\_ISL\_593094  
VIC1499 EPI\_ISL\_456472

VIC14990 EPI\_ISL\_593095  
VIC14994 EPI\_ISL\_593096  
VIC14995 EPI\_ISL\_593097  
VIC14997 EPI\_ISL\_593098  
VIC14998 EPI\_ISL\_592861  
VIC150 EPI\_ISL\_419847  
VIC15000 EPI\_ISL\_593099  
VIC15001 EPI\_ISL\_592638  
VIC15002 EPI\_ISL\_592647  
VIC15004 EPI\_ISL\_592664  
VIC15006 EPI\_ISL\_593100  
VIC15009 EPI\_ISL\_592862  
VIC1501 EPI\_ISL\_456466  
VIC15011 EPI\_ISL\_593101  
VIC15018 EPI\_ISL\_593105  
VIC1502 EPI\_ISL\_456462  
VIC15023 EPI\_ISL\_593108  
VIC15027 EPI\_ISL\_593110  
VIC15029 EPI\_ISL\_593112  
VIC15030 EPI\_ISL\_593113  
VIC15036 EPI\_ISL\_593118  
VIC1504 EPI\_ISL\_456468  
VIC15040 EPI\_ISL\_1055309  
VIC1505 EPI\_ISL\_456469  
VIC15050 EPI\_ISL\_593124  
VIC15061 Rejected  
VIC15063 EPI\_ISL\_592568  
VIC15066 EPI\_ISL\_592858  
VIC15069 EPI\_ISL\_593126  
VIC1507 EPI\_ISL\_456473  
VIC15072 Rejected  
VIC15073 EPI\_ISL\_593127  
VIC15074 EPI\_ISL\_592859  
VIC15075 EPI\_ISL\_592860  
VIC15076 EPI\_ISL\_593128  
VIC15078 Rejected  
VIC15079 EPI\_ISL\_592668  
VIC15083 EPI\_ISL\_593129  
VIC15084 EPI\_ISL\_593130  
VIC15087 EPI\_ISL\_593131  
VIC15088 EPI\_ISL\_593132  
VIC15089 EPI\_ISL\_592673  
VIC15090 EPI\_ISL\_592679  
VIC15094 EPI\_ISL\_593133  
VIC15095 EPI\_ISL\_593134  
VIC15096 EPI\_ISL\_593135  
VIC15097 EPI\_ISL\_593136  
VIC15098 EPI\_ISL\_592829  
VIC15099 EPI\_ISL\_592624  
VIC151 EPI\_ISL\_419848  
VIC15101 EPI\_ISL\_593137  
VIC15103 EPI\_ISL\_592688

VIC15105 EPI\_ISL\_593138  
VIC15106 EPI\_ISL\_592843  
VIC15108 EPI\_ISL\_593139  
VIC15109 EPI\_ISL\_592633  
VIC15111 EPI\_ISL\_456476  
VIC15110 EPI\_ISL\_593140  
VIC15111 EPI\_ISL\_593141  
VIC15112 EPI\_ISL\_593142  
VIC15113 EPI\_ISL\_593143  
VIC15114 EPI\_ISL\_593144  
VIC15115 EPI\_ISL\_592830  
VIC15116 EPI\_ISL\_592844  
VIC15117 EPI\_ISL\_592667  
VIC15118 EPI\_ISL\_593145  
VIC15120 EPI\_ISL\_593146  
VIC15121 EPI\_ISL\_593147  
VIC15122 EPI\_ISL\_593148  
VIC15124 EPI\_ISL\_592692  
VIC15125 EPI\_ISL\_593149  
VIC15127 EPI\_ISL\_593150  
VIC15128 Rejected  
VIC15129 EPI\_ISL\_593151  
VIC1513 EPI\_ISL\_456477  
VIC15131 EPI\_ISL\_593152  
VIC15132 EPI\_ISL\_592593  
VIC15133 EPI\_ISL\_593153  
VIC15139 EPI\_ISL\_593154  
VIC15140 EPI\_ISL\_593155  
VIC15142 EPI\_ISL\_592698  
VIC15144 EPI\_ISL\_593156  
VIC15145 EPI\_ISL\_593157  
VIC15148 EPI\_ISL\_593158  
VIC15149 EPI\_ISL\_593159  
VIC15150 EPI\_ISL\_593160  
VIC15151 EPI\_ISL\_592831  
VIC15154 EPI\_ISL\_593162  
VIC15155 EPI\_ISL\_593163  
VIC15156 EPI\_ISL\_592677  
VIC15157 EPI\_ISL\_592678  
VIC15158 EPI\_ISL\_593164  
VIC15159 EPI\_ISL\_593165  
VIC15163 EPI\_ISL\_593166  
VIC15164 EPI\_ISL\_593167  
VIC15165 EPI\_ISL\_593168  
VIC15168 EPI\_ISL\_593169  
VIC15169 EPI\_ISL\_592845  
VIC15171 EPI\_ISL\_593170  
VIC15174 EPI\_ISL\_593171  
VIC15175 EPI\_ISL\_592846  
VIC15176 EPI\_ISL\_593172  
VIC15177 EPI\_ISL\_592683  
VIC15178 EPI\_ISL\_593173

VIC15179 EPI\_ISL\_593174  
VIC15181 EPI\_ISL\_592552  
VIC15183 EPI\_ISL\_593175  
VIC15185 EPI\_ISL\_593176  
VIC15186 EPI\_ISL\_593177  
VIC15187 EPI\_ISL\_593178  
VIC15188 Rejected  
VIC15189 EPI\_ISL\_592701  
VIC1519 EPI\_ISL\_456458  
VIC15192 EPI\_ISL\_593179  
VIC15193 EPI\_ISL\_593180  
VIC15194 EPI\_ISL\_593181  
VIC15196 EPI\_ISL\_593182  
VIC15197 EPI\_ISL\_593183  
VIC15198 EPI\_ISL\_593184  
VIC15199 EPI\_ISL\_593185  
VIC152 EPI\_ISL\_419849  
VIC15201 EPI\_ISL\_592847  
VIC15202 EPI\_ISL\_593186  
VIC15203 EPI\_ISL\_593187  
VIC15208 EPI\_ISL\_593190  
VIC15219 EPI\_ISL\_593198  
VIC15240 EPI\_ISL\_593213  
VIC15242 EPI\_ISL\_593215  
VIC15243 EPI\_ISL\_592577  
VIC15244 EPI\_ISL\_593216  
VIC15247 EPI\_ISL\_592848  
VIC15249 EPI\_ISL\_593218  
VIC15251 EPI\_ISL\_593220  
VIC15252 EPI\_ISL\_592866  
VIC15256 EPI\_ISL\_593221  
VIC15257 EPI\_ISL\_593222  
VIC15260 Rejected  
VIC15261 EPI\_ISL\_593223  
VIC15262 EPI\_ISL\_592849  
VIC15263 Rejected  
VIC15264 EPI\_ISL\_592682  
VIC15267 EPI\_ISL\_592584  
VIC15269 EPI\_ISL\_593226  
VIC15270 EPI\_ISL\_593227  
VIC15272 EPI\_ISL\_593229  
VIC15274 Rejected  
VIC15276 EPI\_ISL\_593230  
VIC15277 EPI\_ISL\_593231  
VIC15283 Rejected  
VIC15284 EPI\_ISL\_593234  
VIC15287 EPI\_ISL\_592625  
VIC15291 EPI\_ISL\_593237  
VIC15292 EPI\_ISL\_593238  
VIC15294 Rejected  
VIC15296 EPI\_ISL\_593239  
VIC15299 EPI\_ISL\_593241

VIC153 EPI\_ISL\_419850  
VIC15300 EPI\_ISL\_593242  
VIC15302 EPI\_ISL\_593244  
VIC15305 EPI\_ISL\_593245  
VIC15312 EPI\_ISL\_593246  
VIC15315 EPI\_ISL\_593247  
VIC15327 EPI\_ISL\_593248  
VIC15329 EPI\_ISL\_593250  
VIC1533 EPI\_ISL\_456478  
VIC15330 EPI\_ISL\_593251  
VIC15331 EPI\_ISL\_593252  
VIC15332 EPI\_ISL\_593253  
VIC15333 EPI\_ISL\_593254  
VIC15335 EPI\_ISL\_592820  
VIC15336 EPI\_ISL\_593256  
VIC15337 EPI\_ISL\_592863  
VIC15338 EPI\_ISL\_592821  
VIC15339 EPI\_ISL\_592864  
VIC15340 EPI\_ISL\_592865  
VIC15342 EPI\_ISL\_592586  
VIC15346 EPI\_ISL\_592850  
VIC15350 EPI\_ISL\_592620  
VIC15351 EPI\_ISL\_592589  
VIC15352 EPI\_ISL\_592851  
VIC15353 EPI\_ISL\_593257  
VIC15354 Rejected  
VIC15355 Rejected  
VIC15356 EPI\_ISL\_593258  
VIC15357 EPI\_ISL\_593259  
VIC15359 EPI\_ISL\_592594  
VIC15360 EPI\_ISL\_593260  
VIC15361 EPI\_ISL\_593261  
VIC15362 EPI\_ISL\_593262  
VIC15363 EPI\_ISL\_593263  
VIC15364 EPI\_ISL\_593264  
VIC15367 EPI\_ISL\_593265  
VIC15369 EPI\_ISL\_593266  
VIC15370 EPI\_ISL\_593267  
VIC15371 EPI\_ISL\_593268  
VIC15372 EPI\_ISL\_593269  
VIC15373 EPI\_ISL\_592611  
VIC15375 EPI\_ISL\_593270  
VIC15377 EPI\_ISL\_593271  
VIC15378 EPI\_ISL\_593272  
VIC15381 EPI\_ISL\_593273  
VIC15383 EPI\_ISL\_593274  
VIC15384 EPI\_ISL\_593275  
VIC15385 EPI\_ISL\_593276  
VIC15386 EPI\_ISL\_593277  
VIC15387 EPI\_ISL\_593278  
VIC15388 EPI\_ISL\_593279  
VIC15391 EPI\_ISL\_592622

VIC15392 EPI\_ISL\_593280  
VIC15393 EPI\_ISL\_593281  
VIC15394 EPI\_ISL\_593282  
VIC15395 EPI\_ISL\_593283  
VIC15397 EPI\_ISL\_592595  
VIC15398 EPI\_ISL\_603047  
VIC15399 EPI\_ISL\_593284  
VIC154 EPI\_ISL\_419851  
VIC15401 EPI\_ISL\_593285  
VIC15402 EPI\_ISL\_593286  
VIC15403 EPI\_ISL\_593287  
VIC15404 EPI\_ISL\_593288  
VIC15406 EPI\_ISL\_593289  
VIC15407 EPI\_ISL\_592619  
VIC15408 EPI\_ISL\_593290  
VIC15410 EPI\_ISL\_593291  
VIC15411 EPI\_ISL\_593292  
VIC15412 EPI\_ISL\_593293  
VIC15414 EPI\_ISL\_593295  
VIC15416 EPI\_ISL\_593296  
VIC15417 EPI\_ISL\_593297  
VIC15418 EPI\_ISL\_593298  
VIC15420 EPI\_ISL\_593299  
VIC15422 EPI\_ISL\_593300  
VIC15423 Rejected  
VIC15424 EPI\_ISL\_593301  
VIC15426 EPI\_ISL\_592852  
VIC15427 Rejected  
VIC15428 Rejected  
VIC15429 EPI\_ISL\_593302  
VIC15430 EPI\_ISL\_593303  
VIC15431 EPI\_ISL\_592630  
VIC15436 EPI\_ISL\_592853  
VIC15437 EPI\_ISL\_593304  
VIC15438 EPI\_ISL\_593305  
VIC15440 EPI\_ISL\_593306  
VIC15441 EPI\_ISL\_593307  
VIC15444 EPI\_ISL\_593308  
VIC15445 EPI\_ISL\_592629  
VIC15446 EPI\_ISL\_593309  
VIC15448 Rejected  
VIC15450 Rejected  
VIC15452 EPI\_ISL\_593310  
VIC15456 EPI\_ISL\_593311  
VIC15457 EPI\_ISL\_593312  
VIC15458 EPI\_ISL\_593313  
VIC15459 EPI\_ISL\_593314  
VIC15460 EPI\_ISL\_593315  
VIC15461 EPI\_ISL\_592606  
VIC15462 EPI\_ISL\_593316  
VIC15463 EPI\_ISL\_593317  
VIC15465 EPI\_ISL\_593318

VIC15468 EPI\_ISL\_593319  
VIC15469 EPI\_ISL\_593320  
VIC15472 EPI\_ISL\_593321  
VIC15475 EPI\_ISL\_593322  
VIC15476 EPI\_ISL\_593323  
VIC15479 EPI\_ISL\_593324  
VIC15480 Rejected  
VIC15482 EPI\_ISL\_593325  
VIC15483 EPI\_ISL\_593326  
VIC15484 EPI\_ISL\_593327  
VIC15488 EPI\_ISL\_593328  
VIC15489 EPI\_ISL\_593329  
VIC15490 EPI\_ISL\_593330  
VIC15491 EPI\_ISL\_593331  
VIC15493 EPI\_ISL\_593332  
VIC15494 EPI\_ISL\_593333  
VIC15495 EPI\_ISL\_593334  
VIC15497 EPI\_ISL\_593335  
VIC15498 EPI\_ISL\_592690  
VIC15499 EPI\_ISL\_593336  
VIC155 EPI\_ISL\_419852  
VIC15500 EPI\_ISL\_593337  
VIC15502 EPI\_ISL\_592626  
VIC15503 EPI\_ISL\_593338  
VIC15505 EPI\_ISL\_593339  
VIC15506 EPI\_ISL\_593340  
VIC15507 EPI\_ISL\_593341  
VIC15508 Rejected  
VIC15510 EPI\_ISL\_593342  
VIC15511 Rejected  
VIC15512 EPI\_ISL\_593343  
VIC15513 EPI\_ISL\_593344  
VIC15514 EPI\_ISL\_592695  
VIC15515 EPI\_ISL\_592693  
VIC15518 EPI\_ISL\_593345  
VIC15519 EPI\_ISL\_593346  
VIC15520 EPI\_ISL\_593347  
VIC15522 Rejected  
VIC15523 EPI\_ISL\_593348  
VIC15524 Rejected  
VIC15525 Rejected  
VIC15530 EPI\_ISL\_593349  
VIC15533 EPI\_ISL\_592599  
VIC15534 EPI\_ISL\_593350  
VIC15535 EPI\_ISL\_593351  
VIC15536 EPI\_ISL\_593352  
VIC15538 EPI\_ISL\_593353  
VIC15543 EPI\_ISL\_592575  
VIC15544 EPI\_ISL\_593354  
VIC15545 EPI\_ISL\_593355  
VIC15549 EPI\_ISL\_593356  
VIC1555 EPI\_ISL\_456594



VIC15550 EPI\_ISL\_593357  
VIC15551 EPI\_ISL\_593358  
VIC15553 Rejected  
VIC15555 EPI\_ISL\_593359  
VIC15561 EPI\_ISL\_663547  
VIC15562 EPI\_ISL\_593360  
VIC15567 EPI\_ISL\_593361  
VIC15568 EPI\_ISL\_593362  
VIC15569 EPI\_ISL\_593363  
VIC1557 EPI\_ISL\_456479  
VIC15572 EPI\_ISL\_663548  
VIC15576 EPI\_ISL\_592583  
VIC15579 EPI\_ISL\_593368  
VIC15580 EPI\_ISL\_593369  
VIC15586 EPI\_ISL\_592591  
VIC15587 EPI\_ISL\_592648  
VIC1559 EPI\_ISL\_456482  
VIC15590 Rejected  
VIC15593 EPI\_ISL\_593370  
VIC15594 EPI\_ISL\_1055310  
VIC15595 Rejected  
VIC15597 EPI\_ISL\_592644  
VIC15598 Rejected  
VIC156 EPI\_ISL\_419853  
VIC1560 EPI\_ISL\_456483  
VIC15600 EPI\_ISL\_592609  
VIC15602 EPI\_ISL\_592640  
VIC15603 EPI\_ISL\_593371  
VIC15604 EPI\_ISL\_592652  
VIC15607 EPI\_ISL\_593372  
VIC15608 EPI\_ISL\_592700  
VIC15609 EPI\_ISL\_593373  
VIC1561 EPI\_ISL\_456480  
VIC15611 EPI\_ISL\_593374  
VIC15612 EPI\_ISL\_593375  
VIC15614 EPI\_ISL\_593376  
VIC15615 EPI\_ISL\_593377  
VIC15616 EPI\_ISL\_592579  
VIC15617 EPI\_ISL\_593378  
VIC15619 EPI\_ISL\_593379  
VIC1562 EPI\_ISL\_456492  
VIC15620 EPI\_ISL\_593380  
VIC15621 EPI\_ISL\_593381  
VIC15622 EPI\_ISL\_593382  
VIC15623 EPI\_ISL\_592623  
VIC15624 EPI\_ISL\_593383  
VIC15625 EPI\_ISL\_593384  
VIC15626 EPI\_ISL\_593385  
VIC15627 EPI\_ISL\_593386  
VIC15631 EPI\_ISL\_593387  
VIC15633 EPI\_ISL\_593388  
VIC15634 EPI\_ISL\_593389

VIC15635 EPI\_ISL\_593390  
VIC15636 EPI\_ISL\_593391  
VIC15638 EPI\_ISL\_592684  
VIC15639 EPI\_ISL\_593392  
VIC1564 EPI\_ISL\_456485  
VIC15640 EPI\_ISL\_592694  
VIC15641 EPI\_ISL\_592685  
VIC15642 EPI\_ISL\_593393  
VIC15643 EPI\_ISL\_593394  
VIC15644 EPI\_ISL\_592854  
VIC15645 EPI\_ISL\_592671  
VIC15646 EPI\_ISL\_592632  
VIC15647 EPI\_ISL\_593395  
VIC15648 EPI\_ISL\_593396  
VIC1565 EPI\_ISL\_456488  
VIC15652 EPI\_ISL\_592642  
VIC15653 EPI\_ISL\_592669  
VIC15654 EPI\_ISL\_593397  
VIC15655 EPI\_ISL\_593398  
VIC15656 EPI\_ISL\_592696  
VIC15657 EPI\_ISL\_592657  
VIC15658 EPI\_ISL\_593399  
VIC15659 EPI\_ISL\_593400  
VIC15660 EPI\_ISL\_593401  
VIC15661 EPI\_ISL\_592674  
VIC15662 EPI\_ISL\_593402  
VIC15663 EPI\_ISL\_593403  
VIC15664 EPI\_ISL\_593404  
VIC15665 EPI\_ISL\_592643  
VIC15666 EPI\_ISL\_593405  
VIC15668 EPI\_ISL\_592697  
VIC15669 EPI\_ISL\_593406  
VIC15671 EPI\_ISL\_593407  
VIC15672 EPI\_ISL\_593408  
VIC15674 EPI\_ISL\_593409  
VIC15675 EPI\_ISL\_593410  
VIC15690 Rejected  
VIC15691 Rejected  
VIC15695 EPI\_ISL\_592567  
VIC15698 EPI\_ISL\_593413  
VIC15699 Rejected  
VIC157 EPI\_ISL\_419854  
VIC15700 EPI\_ISL\_593414  
VIC15702 EPI\_ISL\_593415  
VIC15703 EPI\_ISL\_592653  
VIC15704 EPI\_ISL\_593416  
VIC15705 EPI\_ISL\_593417  
VIC15707 EPI\_ISL\_592658  
VIC15708 EPI\_ISL\_593418  
VIC15710 EPI\_ISL\_592649  
VIC15712 EPI\_ISL\_592578  
VIC15713 EPI\_ISL\_593419

VIC15714 EPI\_ISL\_592689  
VIC15715 EPI\_ISL\_593420  
VIC15716 EPI\_ISL\_593421  
VIC15717 EPI\_ISL\_592560  
VIC15718 EPI\_ISL\_593422  
VIC1572 EPI\_ISL\_456489  
VIC15720 Rejected  
VIC15721 EPI\_ISL\_592610  
VIC15722 Rejected  
VIC15723 EPI\_ISL\_593423  
VIC15724 EPI\_ISL\_593424  
VIC15725 EPI\_ISL\_593425  
VIC15727 EPI\_ISL\_593426  
VIC15728 EPI\_ISL\_592675  
VIC15729 EPI\_ISL\_593427  
VIC15730 EPI\_ISL\_593428  
VIC15731 EPI\_ISL\_593429  
VIC15732 EPI\_ISL\_593430  
VIC15734 Rejected  
VIC15735 EPI\_ISL\_593431  
VIC15738 EPI\_ISL\_593432  
VIC15739 EPI\_ISL\_593433  
VIC1574 EPI\_ISL\_456493  
VIC15740 EPI\_ISL\_593434  
VIC15741 EPI\_ISL\_593435  
VIC15743 EPI\_ISL\_593436  
VIC15744 EPI\_ISL\_593437  
VIC15746 EPI\_ISL\_593438  
VIC15747 Rejected  
VIC15749 EPI\_ISL\_592855  
VIC1575 EPI\_ISL\_456495  
VIC15752 EPI\_ISL\_593440  
VIC15753 EPI\_ISL\_593441  
VIC15754 EPI\_ISL\_592654  
VIC15755 EPI\_ISL\_593442  
VIC15756 EPI\_ISL\_593443  
VIC15757 EPI\_ISL\_593444  
VIC15758 EPI\_ISL\_593445  
VIC15759 EPI\_ISL\_592687  
VIC15760 EPI\_ISL\_593446  
VIC15762 EPI\_ISL\_592627  
VIC15763 EPI\_ISL\_593447  
VIC15764 Rejected  
VIC15765 EPI\_ISL\_593448  
VIC15766 EPI\_ISL\_593449  
VIC15768 EPI\_ISL\_592635  
VIC15769 EPI\_ISL\_592637  
VIC15772 EPI\_ISL\_593450  
VIC15773 EPI\_ISL\_593451  
VIC15774 EPI\_ISL\_592621  
VIC15776 EPI\_ISL\_593452  
VIC15777 EPI\_ISL\_592655

VIC15778 EPI\_ISL\_593453  
VIC15779 EPI\_ISL\_593454  
VIC15782 EPI\_ISL\_592585  
VIC15783 EPI\_ISL\_593456  
VIC15784 EPI\_ISL\_593457  
VIC15785 EPI\_ISL\_592576  
VIC15786 EPI\_ISL\_593458  
VIC15788 EPI\_ISL\_592686  
VIC15789 EPI\_ISL\_593459  
VIC1579 EPI\_ISL\_456494  
VIC15793 EPI\_ISL\_592592  
VIC15798 EPI\_ISL\_592699  
VIC158 EPI\_ISL\_419855  
VIC15800 EPI\_ISL\_593460  
VIC15803 EPI\_ISL\_593461  
VIC15810 EPI\_ISL\_592856  
VIC15811 EPI\_ISL\_593462  
VIC15813 EPI\_ISL\_593463  
VIC15814 EPI\_ISL\_593464  
VIC15816 EPI\_ISL\_593465  
VIC15817 EPI\_ISL\_592613  
VIC15822 EPI\_ISL\_592672  
VIC15823 EPI\_ISL\_593467  
VIC15825 EPI\_ISL\_592702  
VIC15828 EPI\_ISL\_593468  
VIC15829 EPI\_ISL\_592659  
VIC15830 EPI\_ISL\_593469  
VIC15832 EPI\_ISL\_593470  
VIC15834 EPI\_ISL\_592602  
VIC15835 EPI\_ISL\_593471  
VIC15836 EPI\_ISL\_593472  
VIC15837 EPI\_ISL\_593473  
VIC15839 EPI\_ISL\_593474  
VIC1584 EPI\_ISL\_456503  
VIC15842 EPI\_ISL\_593475  
VIC15843 EPI\_ISL\_592565  
VIC1585 EPI\_ISL\_456504  
VIC15851 Rejected  
VIC15852 Rejected  
VIC15853 Rejected  
VIC15857 Rejected  
VIC15858 Rejected  
VIC1586 EPI\_ISL\_456506  
VIC15860 Rejected  
VIC15861 Rejected  
VIC15863 Rejected  
VIC15866 Rejected  
VIC15867 Rejected  
VIC15869 Rejected  
VIC1587 EPI\_ISL\_456507  
VIC15870 EPI\_ISL\_640784  
VIC15871 Rejected

VIC15874 Rejected  
VIC15879 Rejected  
VIC1588 EPI\_ISL\_456508  
VIC15880 EPI\_ISL\_641177  
VIC15884 Rejected  
VIC15885 EPI\_ISL\_640992  
VIC15888 EPI\_ISL\_641041  
VIC1589 EPI\_ISL\_456509  
VIC15890 Rejected  
VIC15892 Rejected  
VIC15894 Rejected  
VIC15895 Rejected  
VIC15899 Rejected  
VIC159 EPI\_ISL\_419856  
VIC1590 EPI\_ISL\_456510  
VIC15900 EPI\_ISL\_640965  
VIC15901 Rejected  
VIC15903 Rejected  
VIC15906 Rejected  
VIC15909 EPI\_ISL\_640545  
VIC15910 EPI\_ISL\_641136  
VIC15912 EPI\_ISL\_641284  
VIC15913 EPI\_ISL\_1055311  
VIC15914 EPI\_ISL\_640392  
VIC15915 Rejected  
VIC15916 EPI\_ISL\_640687  
VIC15918 EPI\_ISL\_640778  
VIC1592 EPI\_ISL\_456512  
VIC15921 EPI\_ISL\_640575  
VIC15927 EPI\_ISL\_640499  
VIC15928 EPI\_ISL\_641300  
VIC15929 EPI\_ISL\_641010  
VIC1593 EPI\_ISL\_456513  
VIC15930 Rejected  
VIC15931 EPI\_ISL\_640823  
VIC15932 EPI\_ISL\_641263  
VIC15933 EPI\_ISL\_640652  
VIC15935 EPI\_ISL\_641094  
VIC15936 EPI\_ISL\_640782  
VIC15937 EPI\_ISL\_641307  
VIC15939 EPI\_ISL\_640684  
VIC15942 EPI\_ISL\_640647  
VIC15944 EPI\_ISL\_640455  
VIC15945 EPI\_ISL\_640840  
VIC15946 EPI\_ISL\_640833  
VIC15950 EPI\_ISL\_640849  
VIC15954 EPI\_ISL\_641113  
VIC15957 EPI\_ISL\_640479  
VIC15958 EPI\_ISL\_641141  
VIC15959 EPI\_ISL\_1055312  
VIC15960 EPI\_ISL\_640633  
VIC15962 EPI\_ISL\_641118

VIC15963 EPI\_ISL\_640695  
VIC15964 EPI\_ISL\_640805  
VIC15965 EPI\_ISL\_641038  
VIC15967 EPI\_ISL\_640418  
VIC15968 EPI\_ISL\_640535  
VIC15969 EPI\_ISL\_641211  
VIC15972 EPI\_ISL\_640382  
VIC15974 EPI\_ISL\_641100  
VIC15977 EPI\_ISL\_641176  
VIC15979 EPI\_ISL\_640987  
VIC15982 EPI\_ISL\_640485  
VIC15984 EPI\_ISL\_641104  
VIC15985 Rejected  
VIC15987 EPI\_ISL\_640813  
VIC1599 EPI\_ISL\_456499  
VIC15990 EPI\_ISL\_640866  
VIC15991 EPI\_ISL\_640770  
VIC15993 EPI\_ISL\_640706  
VIC15994 EPI\_ISL\_640756  
VIC15996 EPI\_ISL\_640915  
VIC15997 EPI\_ISL\_640973  
VIC15998 EPI\_ISL\_640364  
VIC160 EPI\_ISL\_419857  
VIC16002 EPI\_ISL\_640573  
VIC16003 EPI\_ISL\_640376  
VIC16004 Rejected  
VIC16005 EPI\_ISL\_640504  
VIC16007 EPI\_ISL\_640906  
VIC16008 EPI\_ISL\_641072  
VIC1601 EPI\_ISL\_456595  
VIC16011 EPI\_ISL\_640979  
VIC16012 EPI\_ISL\_640310  
VIC16013 Rejected  
VIC16014 EPI\_ISL\_640693  
VIC16015 EPI\_ISL\_640686  
VIC16017 EPI\_ISL\_641285  
VIC16019 EPI\_ISL\_640566  
VIC16020 EPI\_ISL\_641070  
VIC16021 EPI\_ISL\_640689  
VIC16022 EPI\_ISL\_640804  
VIC16024 EPI\_ISL\_640964  
VIC16025 EPI\_ISL\_640921  
VIC16026 EPI\_ISL\_640945  
VIC16028 EPI\_ISL\_641171  
VIC16029 EPI\_ISL\_640332  
VIC16031 EPI\_ISL\_640702  
VIC16034 EPI\_ISL\_640463  
VIC16035 EPI\_ISL\_640307  
VIC16037 EPI\_ISL\_640807  
VIC16038 EPI\_ISL\_641301  
VIC16039 EPI\_ISL\_640424  
VIC16040 EPI\_ISL\_640589

VIC16041 EPI\_ISL\_640345  
VIC16042 EPI\_ISL\_641179  
VIC16043 Rejected  
VIC16046 EPI\_ISL\_641024  
VIC16048 EPI\_ISL\_640926  
VIC16049 Rejected  
VIC16050 EPI\_ISL\_640371  
VIC16051 EPI\_ISL\_640648  
VIC16052 EPI\_ISL\_641092  
VIC16053 EPI\_ISL\_640593  
VIC16054 EPI\_ISL\_640580  
VIC16055 EPI\_ISL\_640461  
VIC16056 EPI\_ISL\_640709  
VIC16057 EPI\_ISL\_640548  
VIC16059 EPI\_ISL\_640703  
VIC1606 EPI\_ISL\_456517  
VIC16061 EPI\_ISL\_641074  
VIC16062 EPI\_ISL\_640738  
VIC16063 EPI\_ISL\_640409  
VIC16064 EPI\_ISL\_641001  
VIC16066 EPI\_ISL\_640422  
VIC16067 EPI\_ISL\_641155  
VIC16068 EPI\_ISL\_641008  
VIC16069 EPI\_ISL\_640541  
VIC1607 EPI\_ISL\_456518  
VIC16070 EPI\_ISL\_641288  
VIC16071 EPI\_ISL\_640792  
VIC16072 EPI\_ISL\_640467  
VIC16073 EPI\_ISL\_640932  
VIC16075 EPI\_ISL\_640786  
VIC16076 EPI\_ISL\_640928  
VIC16077 EPI\_ISL\_640718  
VIC16078 EPI\_ISL\_640587  
VIC16079 EPI\_ISL\_640839  
VIC1608 EPI\_ISL\_456519  
VIC16081 EPI\_ISL\_640643  
VIC16082 EPI\_ISL\_640621  
VIC16083 EPI\_ISL\_641287  
VIC16084 Rejected  
VIC16085 EPI\_ISL\_640868  
VIC16086 Rejected  
VIC16087 EPI\_ISL\_640832  
VIC16088 EPI\_ISL\_641134  
VIC1609 EPI\_ISL\_456520  
VIC16090 Rejected  
VIC16091 EPI\_ISL\_640790  
VIC16092 EPI\_ISL\_640653  
VIC16093 EPI\_ISL\_641051  
VIC16095 EPI\_ISL\_640440  
VIC16096 EPI\_ISL\_640903  
VIC16097 Rejected  
VIC16098 EPI\_ISL\_640978

VIC16100 Rejected  
VIC16102 EPI\_ISL\_641149  
VIC16103 EPI\_ISL\_640638  
VIC16104 EPI\_ISL\_641115  
VIC16105 EPI\_ISL\_640737  
VIC16106 EPI\_ISL\_640442  
VIC16107 EPI\_ISL\_640814  
VIC16108 EPI\_ISL\_640531  
VIC16109 EPI\_ISL\_640520  
VIC1611 EPI\_ISL\_456521  
VIC16113 EPI\_ISL\_640497  
VIC16117 EPI\_ISL\_640468  
VIC16118 Rejected  
VIC16119 EPI\_ISL\_641153  
VIC16120 EPI\_ISL\_640846  
VIC16121 EPI\_ISL\_641178  
VIC16122 EPI\_ISL\_640745  
VIC16123 EPI\_ISL\_641261  
VIC16124 EPI\_ISL\_640930  
VIC16125 EPI\_ISL\_640571  
VIC16126 EPI\_ISL\_640757  
VIC16127 EPI\_ISL\_640498  
VIC16130 EPI\_ISL\_640799  
VIC16134 EPI\_ISL\_641258  
VIC16135 EPI\_ISL\_640390  
VIC16136 EPI\_ISL\_640404  
VIC16137 EPI\_ISL\_640458  
VIC16138 EPI\_ISL\_641142  
VIC16141 EPI\_ISL\_1055313  
VIC16144 EPI\_ISL\_640768  
VIC16147 EPI\_ISL\_641227  
VIC16153 EPI\_ISL\_640427  
VIC16155 EPI\_ISL\_641164  
VIC16157 EPI\_ISL\_640654  
VIC16158 EPI\_ISL\_640631  
VIC16159 EPI\_ISL\_641186  
VIC16161 EPI\_ISL\_640510  
VIC16162 EPI\_ISL\_1055314  
VIC16163 Rejected  
VIC16164 EPI\_ISL\_640822  
VIC16169 EPI\_ISL\_640950  
VIC1617 EPI\_ISL\_456525  
VIC16171 EPI\_ISL\_641083  
VIC16173 EPI\_ISL\_640414  
VIC16175 EPI\_ISL\_640325  
VIC16176 EPI\_ISL\_640443  
VIC16177 EPI\_ISL\_640749  
VIC16178 EPI\_ISL\_640457  
VIC1618 EPI\_ISL\_456526  
VIC16180 EPI\_ISL\_641221  
VIC16183 EPI\_ISL\_641077  
VIC16184 EPI\_ISL\_640741



VIC16185 EPI\_ISL\_641031  
VIC16187 EPI\_ISL\_640742  
VIC16188 EPI\_ISL\_640719  
VIC16189 EPI\_ISL\_640988  
VIC1619 EPI\_ISL\_456527  
VIC16191 EPI\_ISL\_640657  
VIC16194 Rejected  
VIC16195 Rejected  
VIC16197 EPI\_ISL\_640519  
VIC16199 EPI\_ISL\_640588  
VIC162 EPI\_ISL\_419859  
VIC16200 Rejected  
VIC16208 Rejected  
VIC1621 EPI\_ISL\_456529  
VIC16210 EPI\_ISL\_640975  
VIC16211 EPI\_ISL\_641135  
VIC16213 EPI\_ISL\_640301  
VIC16215 EPI\_ISL\_641050  
VIC16217 EPI\_ISL\_640600  
VIC16218 Rejected  
VIC16219 EPI\_ISL\_640754  
VIC16225 Rejected  
VIC16229 EPI\_ISL\_641109  
VIC1623 EPI\_ISL\_456530  
VIC16232 EPI\_ISL\_641052  
VIC16234 EPI\_ISL\_640385  
VIC16235 EPI\_ISL\_640304  
VIC16236 EPI\_ISL\_641246  
VIC1624 EPI\_ISL\_456531  
VIC16240 EPI\_ISL\_640334  
VIC16241 EPI\_ISL\_640561  
VIC16242 EPI\_ISL\_641193  
VIC16243 EPI\_ISL\_640665  
VIC16245 Rejected  
VIC16247 EPI\_ISL\_641054  
VIC16249 EPI\_ISL\_640480  
VIC16251 Rejected  
VIC16253 EPI\_ISL\_641126  
VIC16254 EPI\_ISL\_640523  
VIC16256 EPI\_ISL\_640963  
VIC16257 EPI\_ISL\_641048  
VIC16261 EPI\_ISL\_640482  
VIC16265 EPI\_ISL\_640487  
VIC16268 EPI\_ISL\_640683  
VIC16269 EPI\_ISL\_640586  
VIC16272 EPI\_ISL\_640662  
VIC16273 EPI\_ISL\_641026  
VIC16274 EPI\_ISL\_640753  
VIC16277 EPI\_ISL\_640977  
VIC16283 Rejected  
VIC16284 Rejected  
VIC16286 Rejected

VIC16287 Rejected  
VIC16288 EPI\_ISL\_641200  
VIC16289 EPI\_ISL\_640610  
VIC16292 Rejected  
VIC16293 EPI\_ISL\_641266  
VIC16295 EPI\_ISL\_640818  
VIC16297 Rejected  
VIC16298 Rejected  
VIC163 EPI\_ISL\_419860  
VIC16300 EPI\_ISL\_640872  
VIC16301 Rejected  
VIC16302 EPI\_ISL\_641214  
VIC16303 EPI\_ISL\_640583  
VIC16304 EPI\_ISL\_640484  
VIC16305 EPI\_ISL\_640734  
VIC16306 EPI\_ISL\_641187  
VIC16307 EPI\_ISL\_640466  
VIC16308 EPI\_ISL\_640470  
VIC16309 EPI\_ISL\_641257  
VIC1631 EPI\_ISL\_456536  
VIC16310 EPI\_ISL\_640634  
VIC16311 EPI\_ISL\_640632  
VIC16312 EPI\_ISL\_640320  
VIC16313 EPI\_ISL\_640373  
VIC16314 EPI\_ISL\_640370  
VIC16315 EPI\_ISL\_641185  
VIC16316 EPI\_ISL\_640841  
VIC16319 EPI\_ISL\_641009  
VIC1632 EPI\_ISL\_456537  
VIC16325 EPI\_ISL\_641244  
VIC16328 EPI\_ISL\_640941  
VIC1633 EPI\_ISL\_456538  
VIC16330 EPI\_ISL\_640357  
VIC16332 EPI\_ISL\_640940  
VIC16334 EPI\_ISL\_641243  
VIC16336 EPI\_ISL\_1055315  
VIC16338 EPI\_ISL\_640777  
VIC16339 EPI\_ISL\_641137  
VIC1634 EPI\_ISL\_456539  
VIC16340 EPI\_ISL\_640764  
VIC16341 EPI\_ISL\_640649  
VIC16342 EPI\_ISL\_1055316  
VIC16343 EPI\_ISL\_641222  
VIC16345 EPI\_ISL\_640374  
VIC16346 EPI\_ISL\_640552  
VIC16347 EPI\_ISL\_640413  
VIC16348 EPI\_ISL\_640565  
VIC16350 EPI\_ISL\_640420  
VIC16352 EPI\_ISL\_640426  
VIC16353 EPI\_ISL\_641150  
VIC16356 EPI\_ISL\_640346  
VIC16357 EPI\_ISL\_641254

VIC16359 EPI\_ISL\_641014  
VIC16362 EPI\_ISL\_640980  
VIC16363 EPI\_ISL\_640857  
VIC16365 EPI\_ISL\_640882  
VIC16366 EPI\_ISL\_640645  
VIC16367 EPI\_ISL\_640528  
VIC16368 EPI\_ISL\_641217  
VIC16369 EPI\_ISL\_640521  
VIC1637 EPI\_ISL\_456540  
VIC16371 EPI\_ISL\_640478  
VIC16373 EPI\_ISL\_640860  
VIC16374 EPI\_ISL\_640341  
VIC16375 EPI\_ISL\_640895  
VIC16378 EPI\_ISL\_641205  
VIC16379 EPI\_ISL\_641241  
VIC1638 EPI\_ISL\_456541  
VIC16380 EPI\_ISL\_640425  
VIC16381 EPI\_ISL\_640362  
VIC16384 EPI\_ISL\_640591  
VIC16387 EPI\_ISL\_640448  
VIC16388 EPI\_ISL\_640604  
VIC16389 EPI\_ISL\_640459  
VIC1639 EPI\_ISL\_456542  
VIC16391 EPI\_ISL\_641303  
VIC16392 EPI\_ISL\_640907  
VIC16393 EPI\_ISL\_640518  
VIC16394 EPI\_ISL\_640885  
VIC16395 EPI\_ISL\_640616  
VIC16396 EPI\_ISL\_641234  
VIC16397 EPI\_ISL\_640343  
VIC16398 EPI\_ISL\_640650  
VIC16399 EPI\_ISL\_640771  
VIC1640 EPI\_ISL\_456543  
VIC16400 EPI\_ISL\_640853  
VIC16402 EPI\_ISL\_640368  
VIC16404 EPI\_ISL\_641055  
VIC16407 EPI\_ISL\_640432  
VIC16408 EPI\_ISL\_640854  
VIC16409 EPI\_ISL\_640636  
VIC1641 EPI\_ISL\_456544  
VIC16410 EPI\_ISL\_640962  
VIC16413 EPI\_ISL\_640968  
VIC16415 EPI\_ISL\_640883  
VIC16416 EPI\_ISL\_640642  
VIC16417 EPI\_ISL\_641138  
VIC16418 EPI\_ISL\_640971  
VIC16419 EPI\_ISL\_640428  
VIC1642 EPI\_ISL\_456545  
VIC16421 EPI\_ISL\_640554  
VIC16424 EPI\_ISL\_641247  
VIC16426 EPI\_ISL\_640564  
VIC16427 EPI\_ISL\_641157

VIC16428 EPI\_ISL\_640889  
VIC16430 EPI\_ISL\_640870  
VIC16431 EPI\_ISL\_640352  
VIC16432 EPI\_ISL\_641162  
VIC16433 EPI\_ISL\_641172  
VIC16435 EPI\_ISL\_640323  
VIC16436 EPI\_ISL\_640671  
VIC16437 EPI\_ISL\_641223  
VIC16438 EPI\_ISL\_640995  
VIC16441 EPI\_ISL\_640599  
VIC16443 EPI\_ISL\_641163  
VIC16444 EPI\_ISL\_641078  
VIC16446 EPI\_ISL\_641098  
VIC16447 EPI\_ISL\_640704  
VIC16449 EPI\_ISL\_640891  
VIC16450 EPI\_ISL\_640858  
VIC16451 EPI\_ISL\_640954  
VIC16453 EPI\_ISL\_640475  
VIC16454 EPI\_ISL\_641053  
VIC16455 EPI\_ISL\_640969  
VIC16457 EPI\_ISL\_640317  
VIC16459 Rejected  
VIC1646 EPI\_ISL\_456548  
VIC16461 EPI\_ISL\_640711  
VIC16462 EPI\_ISL\_641305  
VIC16465 EPI\_ISL\_640894  
VIC16469 EPI\_ISL\_640305  
VIC16471 EPI\_ISL\_641197  
VIC16472 EPI\_ISL\_640715  
VIC16474 EPI\_ISL\_640879  
VIC16475 EPI\_ISL\_640783  
VIC16476 Rejected  
VIC16477 EPI\_ISL\_640644  
VIC16478 EPI\_ISL\_641304  
VIC16479 EPI\_ISL\_640809  
VIC1648 EPI\_ISL\_456550  
VIC16480 EPI\_ISL\_640806  
VIC16481 EPI\_ISL\_640760  
VIC16483 EPI\_ISL\_640819  
VIC16484 EPI\_ISL\_640306  
VIC16485 EPI\_ISL\_640675  
VIC16486 EPI\_ISL\_640881  
VIC16487 EPI\_ISL\_641212  
VIC16488 EPI\_ISL\_640436  
VIC16489 EPI\_ISL\_640619  
VIC1649 EPI\_ISL\_456551  
VIC16490 EPI\_ISL\_640748  
VIC16492 EPI\_ISL\_641167  
VIC16495 EPI\_ISL\_640774  
VIC16496 EPI\_ISL\_640735  
VIC16498 EPI\_ISL\_640673  
VIC16499 EPI\_ISL\_641123

VIC165 EPI\_ISL\_419862  
VIC16507 EPI\_ISL\_640788  
VIC16508 EPI\_ISL\_640829  
VIC16509 EPI\_ISL\_640752  
VIC1651 EPI\_ISL\_456553  
VIC16510 EPI\_ISL\_640496  
VIC16514 EPI\_ISL\_640533  
VIC16516 EPI\_ISL\_641308  
VIC16517 EPI\_ISL\_640831  
VIC16518 EPI\_ISL\_640542  
VIC16519 EPI\_ISL\_641259  
VIC1652 EPI\_ISL\_456554  
VIC16520 EPI\_ISL\_641194  
VIC16521 EPI\_ISL\_640707  
VIC16522 EPI\_ISL\_641122  
VIC16523 EPI\_ISL\_640798  
VIC16525 EPI\_ISL\_640871  
VIC16529 EPI\_ISL\_641224  
VIC1653 EPI\_ISL\_456555  
VIC16531 EPI\_ISL\_640758  
VIC16532 EPI\_ISL\_640851  
VIC16533 EPI\_ISL\_640896  
VIC16534 EPI\_ISL\_640810  
VIC16537 EPI\_ISL\_640736  
VIC16539 EPI\_ISL\_641249  
VIC16540 EPI\_ISL\_640974  
VIC16541 EPI\_ISL\_640355  
VIC16543 EPI\_ISL\_640506  
VIC16544 EPI\_ISL\_640944  
VIC16546 EPI\_ISL\_640340  
VIC16547 EPI\_ISL\_640793  
VIC16549 EPI\_ISL\_640628  
VIC1655 EPI\_ISL\_456557  
VIC16550 EPI\_ISL\_640966  
VIC16551 EPI\_ISL\_640603  
VIC16552 EPI\_ISL\_640581  
VIC16555 EPI\_ISL\_640708  
VIC16556 EPI\_ISL\_640972  
VIC16557 EPI\_ISL\_641206  
VIC16558 EPI\_ISL\_640936  
VIC16562 EPI\_ISL\_640613  
VIC16563 EPI\_ISL\_641208  
VIC16564 EPI\_ISL\_640612  
VIC16565 EPI\_ISL\_640445  
VIC16566 EPI\_ISL\_640990  
VIC16567 EPI\_ISL\_640474  
VIC16568 EPI\_ISL\_641268  
VIC16571 EPI\_ISL\_649149  
VIC16572 EPI\_ISL\_641275  
VIC16573 EPI\_ISL\_640412  
VIC16576 EPI\_ISL\_641170  
VIC1658 EPI\_ISL\_456559

VIC16581 EPI\_ISL\_640937  
VIC1659 EPI\_ISL\_456560  
VIC16593 EPI\_ISL\_640540  
VIC16597 EPI\_ISL\_641013  
VIC16599 EPI\_ISL\_640952  
VIC166 EPI\_ISL\_419863  
VIC1660 EPI\_ISL\_456561  
VIC16600 EPI\_ISL\_641047  
VIC16601 EPI\_ISL\_640406  
VIC16607 EPI\_ISL\_640359  
VIC16609 EPI\_ISL\_640399  
VIC1661 EPI\_ISL\_456562  
VIC16611 EPI\_ISL\_640727  
VIC16612 EPI\_ISL\_663404  
VIC16613 EPI\_ISL\_640556  
VIC16614 EPI\_ISL\_640670  
VIC16615 EPI\_ISL\_641230  
VIC16617 EPI\_ISL\_640997  
VIC1662 EPI\_ISL\_456563  
VIC16620 EPI\_ISL\_663549  
VIC16621 EPI\_ISL\_641189  
VIC16624 EPI\_ISL\_641058  
VIC16626 EPI\_ISL\_640517  
VIC16628 EPI\_ISL\_640692  
VIC16629 EPI\_ISL\_641165  
VIC1663 EPI\_ISL\_456564  
VIC16631 EPI\_ISL\_641169  
VIC16632 EPI\_ISL\_640559  
VIC16633 EPI\_ISL\_663546  
VIC16634 EPI\_ISL\_641124  
VIC16635 EPI\_ISL\_663325  
VIC16637 EPI\_ISL\_640794  
VIC1664 EPI\_ISL\_456565  
VIC16640 EPI\_ISL\_641079  
VIC16641 EPI\_ISL\_640902  
VIC16643 EPI\_ISL\_641213  
VIC16645 EPI\_ISL\_641158  
VIC16646 EPI\_ISL\_640321  
VIC16648 EPI\_ISL\_640401  
VIC16649 EPI\_ISL\_640551  
VIC1665 EPI\_ISL\_456566  
VIC16651 Rejected  
VIC16652 EPI\_ISL\_640914  
VIC16653 EPI\_ISL\_640989  
VIC16654 EPI\_ISL\_640400  
VIC16656 Rejected  
VIC16658 EPI\_ISL\_640696  
VIC16660 EPI\_ISL\_663550  
VIC16663 EPI\_ISL\_640789  
VIC16664 EPI\_ISL\_640842  
VIC16668 EPI\_ISL\_640876  
VIC1667 EPI\_ISL\_456568

VIC16670 EPI\_ISL\_640472  
VIC16671 EPI\_ISL\_640539  
VIC16672 EPI\_ISL\_640780  
VIC16673 EPI\_ISL\_641148  
VIC16674 EPI\_ISL\_641028  
VIC16677 EPI\_ISL\_641037  
VIC16678 EPI\_ISL\_641056  
VIC16679 EPI\_ISL\_641021  
VIC16680 EPI\_ISL\_640415  
VIC16681 EPI\_ISL\_641256  
VIC16682 EPI\_ISL\_641295  
VIC16683 EPI\_ISL\_640395  
VIC16684 EPI\_ISL\_641139  
VIC16685 EPI\_ISL\_640731  
VIC16687 EPI\_ISL\_641278  
VIC16688 EPI\_ISL\_640637  
VIC16690 EPI\_ISL\_640900  
VIC16691 EPI\_ISL\_640407  
VIC16692 EPI\_ISL\_649151  
VIC16693 EPI\_ISL\_641253  
VIC16694 EPI\_ISL\_640747  
VIC16695 EPI\_ISL\_640578  
VIC16696 EPI\_ISL\_640824  
VIC16699 EPI\_ISL\_640602  
VIC167 EPI\_ISL\_419864  
VIC16702 EPI\_ISL\_640515  
VIC16703 EPI\_ISL\_640516  
VIC16704 EPI\_ISL\_640387  
VIC16706 EPI\_ISL\_640676  
VIC16708 EPI\_ISL\_641207  
VIC16710 EPI\_ISL\_640525  
VIC16711 EPI\_ISL\_640721  
VIC16712 EPI\_ISL\_640660  
VIC16713 EPI\_ISL\_640491  
VIC16714 EPI\_ISL\_640378  
VIC16720 Rejected  
VIC16721 EPI\_ISL\_663320  
VIC16722 EPI\_ISL\_663551  
VIC16725 EPI\_ISL\_663552  
VIC16727 EPI\_ISL\_663553  
VIC16728 EPI\_ISL\_663554  
VIC16729 EPI\_ISL\_663555  
VIC16731 EPI\_ISL\_663556  
VIC16732 EPI\_ISL\_663557  
VIC16733 EPI\_ISL\_663558  
VIC16737 EPI\_ISL\_663347  
VIC16738 EPI\_ISL\_1055317  
VIC1674 EPI\_ISL\_456573  
VIC16741 EPI\_ISL\_663561  
VIC16742 EPI\_ISL\_663562  
VIC16743 EPI\_ISL\_663563  
VIC16745 EPI\_ISL\_663564

VIC16746 EPI\_ISL\_663565  
VIC16747 EPI\_ISL\_663566  
VIC1675 EPI\_ISL\_456574  
VIC16750 EPI\_ISL\_663567  
VIC16752 EPI\_ISL\_663535  
VIC16753 EPI\_ISL\_663568  
VIC16754 EPI\_ISL\_663569  
VIC16755 EPI\_ISL\_663570  
VIC16759 EPI\_ISL\_663571  
VIC16765 EPI\_ISL\_663572  
VIC16767 EPI\_ISL\_663573  
VIC16771 EPI\_ISL\_663574  
VIC16772 EPI\_ISL\_663575  
VIC16774 EPI\_ISL\_663576  
VIC16777 EPI\_ISL\_663315  
VIC1678 EPI\_ISL\_456580  
VIC16780 EPI\_ISL\_663577  
VIC16782 EPI\_ISL\_663578  
VIC16785 EPI\_ISL\_663579  
VIC16786 EPI\_ISL\_663580  
VIC16787 EPI\_ISL\_663581  
VIC16789 EPI\_ISL\_663380  
VIC1679 EPI\_ISL\_456581  
VIC16790 Rejected  
VIC16795 EPI\_ISL\_663335  
VIC16796 EPI\_ISL\_663582  
VIC16797 EPI\_ISL\_663340  
VIC16798 EPI\_ISL\_663583  
VIC16799 EPI\_ISL\_663584  
VIC168 EPI\_ISL\_419865  
VIC1680 EPI\_ISL\_456575  
VIC16800 EPI\_ISL\_663585  
VIC16809 EPI\_ISL\_663429  
VIC16813 EPI\_ISL\_663413  
VIC16817 EPI\_ISL\_663428  
VIC16818 EPI\_ISL\_663586  
VIC16821 EPI\_ISL\_663587  
VIC16825 EPI\_ISL\_663588  
VIC16826 EPI\_ISL\_663589  
VIC16827 EPI\_ISL\_663590  
VIC16828 EPI\_ISL\_663591  
VIC16831 EPI\_ISL\_663359  
VIC16832 EPI\_ISL\_663592  
VIC16834 EPI\_ISL\_663593  
VIC16835 EPI\_ISL\_663594  
VIC16836 EPI\_ISL\_663595  
VIC16837 EPI\_ISL\_663596  
VIC16838 EPI\_ISL\_663597  
VIC16839 EPI\_ISL\_663598  
VIC16840 EPI\_ISL\_663599  
VIC16841 EPI\_ISL\_663600  
VIC16843 EPI\_ISL\_663601



VIC16844 EPI\_ISL\_663306  
VIC16846 EPI\_ISL\_663602  
VIC16848 EPI\_ISL\_663603  
VIC16850 EPI\_ISL\_663604  
VIC16852 EPI\_ISL\_663605  
VIC16853 EPI\_ISL\_663606  
VIC16854 EPI\_ISL\_663607  
VIC16855 EPI\_ISL\_663608  
VIC16857 EPI\_ISL\_663609  
VIC16858 EPI\_ISL\_663610  
VIC16860 EPI\_ISL\_1055318  
VIC16862 EPI\_ISL\_663611  
VIC16863 EPI\_ISL\_663612  
VIC16865 EPI\_ISL\_663393  
VIC16867 EPI\_ISL\_663381  
VIC16868 EPI\_ISL\_663613  
VIC16869 EPI\_ISL\_663614  
VIC16873 EPI\_ISL\_663615  
VIC16874 EPI\_ISL\_663616  
VIC16875 EPI\_ISL\_663617  
VIC16878 EPI\_ISL\_663307  
VIC16879 EPI\_ISL\_663618  
VIC1688 EPI\_ISL\_456590  
VIC16880 EPI\_ISL\_663619  
VIC16881 EPI\_ISL\_663620  
VIC16882 EPI\_ISL\_663621  
VIC16883 EPI\_ISL\_663622  
VIC16884 EPI\_ISL\_663329  
VIC16886 EPI\_ISL\_663623  
VIC16887 EPI\_ISL\_663624  
VIC16888 EPI\_ISL\_663416  
VIC16889 EPI\_ISL\_663625  
VIC16890 EPI\_ISL\_663626  
VIC16892 EPI\_ISL\_663316  
VIC16893 EPI\_ISL\_663627  
VIC16894 EPI\_ISL\_663628  
VIC16896 EPI\_ISL\_663629  
VIC16897 EPI\_ISL\_663630  
VIC16898 EPI\_ISL\_663631  
VIC169 EPI\_ISL\_419866  
VIC16900 EPI\_ISL\_663632  
VIC16901 EPI\_ISL\_663633  
VIC16902 EPI\_ISL\_663356  
VIC16903 EPI\_ISL\_663431  
VIC16904 EPI\_ISL\_663536  
VIC16905 EPI\_ISL\_663529  
VIC16906 EPI\_ISL\_663634  
VIC16908 EPI\_ISL\_663530  
VIC16910 EPI\_ISL\_663635  
VIC16912 EPI\_ISL\_663636  
VIC16913 EPI\_ISL\_663637  
VIC16914 EPI\_ISL\_663638

VIC16915 EPI\_ISL\_663639  
VIC16916 EPI\_ISL\_663640  
VIC16918 EPI\_ISL\_663641  
VIC16919 EPI\_ISL\_663642  
VIC16920 EPI\_ISL\_663419  
VIC16921 EPI\_ISL\_663643  
VIC16922 EPI\_ISL\_663420  
VIC16923 EPI\_ISL\_663531  
VIC16924 EPI\_ISL\_663532  
VIC16925 EPI\_ISL\_663533  
VIC16927 EPI\_ISL\_663534  
VIC16929 EPI\_ISL\_663644  
VIC16931 EPI\_ISL\_663371  
VIC16932 EPI\_ISL\_663645  
VIC16933 EPI\_ISL\_663418  
VIC16934 EPI\_ISL\_663345  
VIC16935 EPI\_ISL\_663646  
VIC16936 EPI\_ISL\_663398  
VIC16937 EPI\_ISL\_663647  
VIC16938 EPI\_ISL\_663648  
VIC16939 EPI\_ISL\_663649  
VIC16940 EPI\_ISL\_663650  
VIC16941 EPI\_ISL\_663651  
VIC16942 EPI\_ISL\_663652  
VIC16944 EPI\_ISL\_663654  
VIC16945 EPI\_ISL\_663655  
VIC16946 EPI\_ISL\_663656  
VIC16947 EPI\_ISL\_663657  
VIC16948 EPI\_ISL\_663658  
VIC16949 EPI\_ISL\_663659  
VIC16957 EPI\_ISL\_663660  
VIC16959 EPI\_ISL\_663425  
VIC16960 EPI\_ISL\_663661  
VIC16961 EPI\_ISL\_663424  
VIC16962 EPI\_ISL\_663662  
VIC16965 EPI\_ISL\_663663  
VIC16967 EPI\_ISL\_663664  
VIC16968 EPI\_ISL\_663665  
VIC16970 EPI\_ISL\_663666  
VIC16971 EPI\_ISL\_663312  
VIC16972 EPI\_ISL\_663667  
VIC16975 EPI\_ISL\_663668  
VIC16979 EPI\_ISL\_663669  
VIC16981 EPI\_ISL\_663300  
VIC16982 EPI\_ISL\_663537  
VIC16983 EPI\_ISL\_663670  
VIC16984 EPI\_ISL\_663671  
VIC16986 EPI\_ISL\_663672  
VIC16987 EPI\_ISL\_663673  
VIC16988 EPI\_ISL\_663538  
VIC16989 EPI\_ISL\_663674  
VIC16994 EPI\_ISL\_663675

VIC16995 EPI\_ISL\_663311  
VIC16996 EPI\_ISL\_663676  
VIC16997 EPI\_ISL\_663677  
VIC16998 EPI\_ISL\_663678  
VIC16999 EPI\_ISL\_663679  
VIC17 EPI\_ISL\_419736  
VIC170 EPI\_ISL\_419867  
VIC1700 EPI\_ISL\_456587  
VIC17000 EPI\_ISL\_663388  
VIC17001 EPI\_ISL\_663680  
VIC17003 EPI\_ISL\_663330  
VIC17004 EPI\_ISL\_663681  
VIC17005 EPI\_ISL\_663682  
VIC17007 EPI\_ISL\_663684  
VIC17010 EPI\_ISL\_663685  
VIC17012 Rejected  
VIC17014 Rejected  
VIC17015 EPI\_ISL\_663361  
VIC17019 EPI\_ISL\_663686  
VIC17020 EPI\_ISL\_663687  
VIC17021 EPI\_ISL\_663688  
VIC17023 EPI\_ISL\_663689  
VIC17025 EPI\_ISL\_663690  
VIC17026 EPI\_ISL\_663691  
VIC17028 EPI\_ISL\_663692  
VIC17029 EPI\_ISL\_663693  
VIC1703 EPI\_ISL\_456588  
VIC17030 EPI\_ISL\_663321  
VIC17031 EPI\_ISL\_663694  
VIC17032 EPI\_ISL\_663304  
VIC17033 EPI\_ISL\_663695  
VIC17037 EPI\_ISL\_663696  
VIC1704 EPI\_ISL\_456589  
VIC17040 EPI\_ISL\_663697  
VIC17041 EPI\_ISL\_663698  
VIC17042 EPI\_ISL\_663699  
VIC17043 EPI\_ISL\_663700  
VIC17044 EPI\_ISL\_663701  
VIC17045 EPI\_ISL\_663702  
VIC17047 EPI\_ISL\_663703  
VIC17048 EPI\_ISL\_663704  
VIC17049 EPI\_ISL\_663705  
VIC17051 EPI\_ISL\_663707  
VIC17052 EPI\_ISL\_663708  
VIC17053 EPI\_ISL\_663709  
VIC17054 EPI\_ISL\_663308  
VIC17055 EPI\_ISL\_1033125  
VIC17056 EPI\_ISL\_663710  
VIC17057 EPI\_ISL\_663711  
VIC17059 EPI\_ISL\_663374  
VIC17060 EPI\_ISL\_663712  
VIC17063 EPI\_ISL\_663310

VIC17066 EPI\_ISL\_663713  
VIC17067 EPI\_ISL\_663714  
VIC17068 EPI\_ISL\_663715  
VIC17069 EPI\_ISL\_663544  
VIC17070 EPI\_ISL\_663716  
VIC17071 EPI\_ISL\_663717  
VIC17073 EPI\_ISL\_663358  
VIC17075 EPI\_ISL\_663718  
VIC17076 EPI\_ISL\_663432  
VIC17078 EPI\_ISL\_663719  
VIC1708 EPI\_ISL\_456614  
VIC17080 EPI\_ISL\_663720  
VIC17081 EPI\_ISL\_663721  
VIC17082 EPI\_ISL\_663722  
VIC17085 EPI\_ISL\_663723  
VIC17086 EPI\_ISL\_663724  
VIC17088 EPI\_ISL\_663725  
VIC17091 EPI\_ISL\_663726  
VIC17092 EPI\_ISL\_663727  
VIC17094 EPI\_ISL\_663728  
VIC17097 EPI\_ISL\_663729  
VIC17098 EPI\_ISL\_663730  
VIC17099 EPI\_ISL\_663731  
VIC171 EPI\_ISL\_419868  
VIC17101 EPI\_ISL\_663732  
VIC17103 EPI\_ISL\_663733  
VIC17105 EPI\_ISL\_663734  
VIC17106 EPI\_ISL\_663735  
VIC17107 EPI\_ISL\_663736  
VIC17109 EPI\_ISL\_663737  
VIC17112 EPI\_ISL\_663368  
VIC17113 EPI\_ISL\_663738  
VIC17114 EPI\_ISL\_663739  
VIC17115 EPI\_ISL\_663331  
VIC17116 EPI\_ISL\_663740  
VIC17117 EPI\_ISL\_663741  
VIC17118 Rejected  
VIC17119 EPI\_ISL\_663742  
VIC1712 EPI\_ISL\_456617  
VIC17120 EPI\_ISL\_663743  
VIC17121 EPI\_ISL\_663343  
VIC17122 EPI\_ISL\_663744  
VIC17123 EPI\_ISL\_663745  
VIC17124 EPI\_ISL\_663746  
VIC17125 EPI\_ISL\_663747  
VIC17126 EPI\_ISL\_663748  
VIC17127 EPI\_ISL\_663749  
VIC17128 EPI\_ISL\_663750  
VIC17129 EPI\_ISL\_663366  
VIC17130 EPI\_ISL\_663751  
VIC17131 EPI\_ISL\_663752  
VIC17132 EPI\_ISL\_663753

VIC17133 EPI\_ISL\_663754  
VIC17134 EPI\_ISL\_663755  
VIC17137 EPI\_ISL\_663756  
VIC17138 EPI\_ISL\_663757  
VIC17139 EPI\_ISL\_663357  
VIC17141 EPI\_ISL\_663758  
VIC17142 EPI\_ISL\_663759  
VIC17144 EPI\_ISL\_663760  
VIC17145 EPI\_ISL\_663761  
VIC17146 EPI\_ISL\_663762  
VIC17147 EPI\_ISL\_663763  
VIC17148 EPI\_ISL\_663764  
VIC17149 EPI\_ISL\_663765  
VIC17150 EPI\_ISL\_663766  
VIC17151 EPI\_ISL\_663767  
VIC17152 EPI\_ISL\_1033126  
VIC17153 EPI\_ISL\_663768  
VIC17154 EPI\_ISL\_663769  
VIC17156 EPI\_ISL\_663770  
VIC17158 EPI\_ISL\_663771  
VIC17159 EPI\_ISL\_663772  
VIC1716 EPI\_ISL\_456618  
VIC17161 EPI\_ISL\_663773  
VIC17162 EPI\_ISL\_663774  
VIC17164 EPI\_ISL\_663775  
VIC17165 EPI\_ISL\_663776  
VIC17167 EPI\_ISL\_663777  
VIC17168 Rejected  
VIC17169 Rejected  
VIC17170 EPI\_ISL\_1033127  
VIC17171 EPI\_ISL\_663778  
VIC17175 Rejected  
VIC17176 EPI\_ISL\_663779  
VIC17177 Rejected  
VIC17178 Rejected  
VIC17179 EPI\_ISL\_663780  
VIC1718 EPI\_ISL\_456619  
VIC17180 Rejected  
VIC17181 Rejected  
VIC17182 EPI\_ISL\_663408  
VIC17183 EPI\_ISL\_663781  
VIC17184 EPI\_ISL\_663782  
VIC17185 EPI\_ISL\_663382  
VIC17186 EPI\_ISL\_663322  
VIC17188 EPI\_ISL\_663389  
VIC17190 EPI\_ISL\_663784  
VIC17192 EPI\_ISL\_663785  
VIC17193 EPI\_ISL\_663786  
VIC17194 EPI\_ISL\_663787  
VIC17195 EPI\_ISL\_663788  
VIC17196 EPI\_ISL\_663426  
VIC17198 EPI\_ISL\_663789

VIC172 EPI\_ISL\_419869  
VIC1720 EPI\_ISL\_456621  
VIC17201 EPI\_ISL\_663790  
VIC17202 EPI\_ISL\_663791  
VIC17203 EPI\_ISL\_663792  
VIC17204 EPI\_ISL\_663793  
VIC17205 EPI\_ISL\_663372  
VIC17206 EPI\_ISL\_663794  
VIC17208 EPI\_ISL\_663795  
VIC17209 EPI\_ISL\_663407  
VIC17210 EPI\_ISL\_663796  
VIC17214 EPI\_ISL\_663349  
VIC17215 EPI\_ISL\_663797  
VIC17216 EPI\_ISL\_663798  
VIC17218 EPI\_ISL\_663799  
VIC17219 EPI\_ISL\_663438  
VIC17223 EPI\_ISL\_663800  
VIC17224 EPI\_ISL\_663801  
VIC17225 EPI\_ISL\_663802  
VIC17226 EPI\_ISL\_663803  
VIC17227 EPI\_ISL\_663804  
VIC17228 EPI\_ISL\_663805  
VIC17232 EPI\_ISL\_663373  
VIC17233 EPI\_ISL\_663807  
VIC17234 EPI\_ISL\_663808  
VIC17235 EPI\_ISL\_663809  
VIC17236 EPI\_ISL\_663810  
VIC17237 EPI\_ISL\_663811  
VIC17239 EPI\_ISL\_663351  
VIC17241 EPI\_ISL\_663360  
VIC17247 EPI\_ISL\_663812  
VIC17256 Rejected  
VIC1726 EPI\_ISL\_456626  
VIC17270 EPI\_ISL\_663813  
VIC17271 EPI\_ISL\_663384  
VIC17272 EPI\_ISL\_663814  
VIC17273 EPI\_ISL\_663815  
VIC17274 EPI\_ISL\_663816  
VIC17276 EPI\_ISL\_663817  
VIC17279 Rejected  
VIC17280 EPI\_ISL\_663818  
VIC17283 EPI\_ISL\_663819  
VIC17285 EPI\_ISL\_663394  
VIC17289 EPI\_ISL\_663303  
VIC17290 EPI\_ISL\_663820  
VIC17291 EPI\_ISL\_663821  
VIC17292 EPI\_ISL\_663822  
VIC17293 EPI\_ISL\_663823  
VIC17297 EPI\_ISL\_663824  
VIC17299 EPI\_ISL\_663825  
VIC173 EPI\_ISL\_419870  
VIC17300 EPI\_ISL\_663826

VIC17301 EPI\_ISL\_1033128  
VIC17302 EPI\_ISL\_663827  
VIC17303 EPI\_ISL\_663828  
VIC17304 EPI\_ISL\_663829  
VIC17305 EPI\_ISL\_663830  
VIC17306 EPI\_ISL\_663831  
VIC17307 EPI\_ISL\_663832  
VIC17309 EPI\_ISL\_663440  
VIC17310 EPI\_ISL\_663409  
VIC17311 EPI\_ISL\_663834  
VIC17312 EPI\_ISL\_663301  
VIC17313 EPI\_ISL\_663835  
VIC17314 EPI\_ISL\_663836  
VIC17315 EPI\_ISL\_1033129  
VIC17316 EPI\_ISL\_663837  
VIC17318 EPI\_ISL\_1055319  
VIC17319 EPI\_ISL\_663838  
VIC17321 EPI\_ISL\_663839  
VIC17322 EPI\_ISL\_663840  
VIC17326 EPI\_ISL\_663841  
VIC17327 EPI\_ISL\_663842  
VIC17330 EPI\_ISL\_663843  
VIC17331 EPI\_ISL\_663844  
VIC17332 EPI\_ISL\_663845  
VIC17333 EPI\_ISL\_663846  
VIC17334 EPI\_ISL\_663847  
VIC17335 EPI\_ISL\_663848  
VIC17336 EPI\_ISL\_663299  
VIC17337 EPI\_ISL\_663421  
VIC17338 EPI\_ISL\_663849  
VIC1734 EPI\_ISL\_456632  
VIC17340 EPI\_ISL\_663850  
VIC17341 EPI\_ISL\_663851  
VIC17346 EPI\_ISL\_663411  
VIC17348 EPI\_ISL\_663852  
VIC17350 EPI\_ISL\_663435  
VIC17351 EPI\_ISL\_663433  
VIC17352 EPI\_ISL\_663853  
VIC17353 EPI\_ISL\_663539  
VIC17354 EPI\_ISL\_663854  
VIC17355 EPI\_ISL\_663385  
VIC17356 EPI\_ISL\_663855  
VIC17357 EPI\_ISL\_663346  
VIC17359 EPI\_ISL\_663856  
VIC1736 EPI\_ISL\_456633  
VIC17361 EPI\_ISL\_663540  
VIC17363 EPI\_ISL\_663857  
VIC17364 EPI\_ISL\_663858  
VIC17365 EPI\_ISL\_663859  
VIC17367 EPI\_ISL\_663860  
VIC17368 EPI\_ISL\_663861  
VIC17369 EPI\_ISL\_663334

VIC1737 EPI\_ISL\_456634  
VIC17370 EPI\_ISL\_663375  
VIC17371 EPI\_ISL\_663862  
VIC17373 EPI\_ISL\_663386  
VIC17374 EPI\_ISL\_663863  
VIC17375 EPI\_ISL\_663864  
VIC17379 EPI\_ISL\_663865  
VIC17381 EPI\_ISL\_663866  
VIC17382 EPI\_ISL\_663867  
VIC17385 EPI\_ISL\_663868  
VIC17386 EPI\_ISL\_663869  
VIC17388 EPI\_ISL\_663342  
VIC17390 EPI\_ISL\_663870  
VIC17392 EPI\_ISL\_663871  
VIC17395 EPI\_ISL\_663305  
VIC17396 EPI\_ISL\_663327  
VIC17397 EPI\_ISL\_663872  
VIC17398 EPI\_ISL\_663313  
VIC17399 EPI\_ISL\_663873  
VIC174 EPI\_ISL\_419871  
VIC17403 Rejected  
VIC17404 EPI\_ISL\_962816  
VIC17406 EPI\_ISL\_663396  
VIC17407 EPI\_ISL\_663874  
VIC17408 EPI\_ISL\_663875  
VIC17410 Rejected  
VIC17411 EPI\_ISL\_663876  
VIC17412 EPI\_ISL\_663877  
VIC17414 EPI\_ISL\_663412  
VIC17415 EPI\_ISL\_663878  
VIC17416 EPI\_ISL\_663879  
VIC17418 EPI\_ISL\_663880  
VIC17422 EPI\_ISL\_663881  
VIC17424 EPI\_ISL\_663390  
VIC17425 EPI\_ISL\_663364  
VIC17426 EPI\_ISL\_663383  
VIC17427 EPI\_ISL\_663378  
VIC17428 EPI\_ISL\_663882  
VIC17429 EPI\_ISL\_663883  
VIC1743 EPI\_ISL\_456638  
VIC17430 EPI\_ISL\_663884  
VIC17433 EPI\_ISL\_663885  
VIC17434 EPI\_ISL\_663886  
VIC17437 EPI\_ISL\_663391  
VIC17438 EPI\_ISL\_663379  
VIC17439 EPI\_ISL\_663427  
VIC17442 EPI\_ISL\_663887  
VIC17444 EPI\_ISL\_663888  
VIC17445 EPI\_ISL\_663889  
VIC17446 EPI\_ISL\_663890  
VIC17447 EPI\_ISL\_663401  
VIC17448 Rejected



VIC17450 EPI\_ISL\_663891  
VIC17452 EPI\_ISL\_663892  
VIC17453 EPI\_ISL\_663541  
VIC17454 EPI\_ISL\_663893  
VIC17457 EPI\_ISL\_663332  
VIC17459 EPI\_ISL\_663369  
VIC17460 EPI\_ISL\_663894  
VIC17461 EPI\_ISL\_663895  
VIC17463 EPI\_ISL\_663402  
VIC17464 EPI\_ISL\_663896  
VIC17465 EPI\_ISL\_663417  
VIC17466 EPI\_ISL\_663395  
VIC17467 EPI\_ISL\_663897  
VIC17469 EPI\_ISL\_663898  
VIC17473 EPI\_ISL\_663350  
VIC17475 EPI\_ISL\_663899  
VIC17476 EPI\_ISL\_663399  
VIC17477 EPI\_ISL\_663900  
VIC17478 EPI\_ISL\_663405  
VIC17479 EPI\_ISL\_663901  
VIC17480 EPI\_ISL\_663314  
VIC17481 EPI\_ISL\_663902  
VIC17484 EPI\_ISL\_663903  
VIC17485 EPI\_ISL\_663339  
VIC17486 EPI\_ISL\_663352  
VIC17488 EPI\_ISL\_663363  
VIC1749 EPI\_ISL\_456642  
VIC17490 EPI\_ISL\_663341  
VIC17491 EPI\_ISL\_663338  
VIC17496 EPI\_ISL\_663377  
VIC17497 EPI\_ISL\_663904  
VIC17498 EPI\_ISL\_663406  
VIC175 EPI\_ISL\_419872  
VIC17500 EPI\_ISL\_663365  
VIC17501 EPI\_ISL\_663542  
VIC17502 EPI\_ISL\_663403  
VIC17508 EPI\_ISL\_663344  
VIC17509 EPI\_ISL\_779414  
VIC17511 EPI\_ISL\_663905  
VIC17512 EPI\_ISL\_663906  
VIC17516 EPI\_ISL\_663907  
VIC17517 EPI\_ISL\_663908  
VIC17519 EPI\_ISL\_663319  
VIC17522 EPI\_ISL\_663423  
VIC17523 Rejected  
VIC17525 EPI\_ISL\_1033132  
VIC17527 EPI\_ISL\_663909  
VIC17529 EPI\_ISL\_663910  
VIC17531 EPI\_ISL\_663434  
VIC17532 EPI\_ISL\_663911  
VIC17534 EPI\_ISL\_663912  
VIC17535 EPI\_ISL\_663913

VIC17536 EPI\_ISL\_663914  
VIC17544 EPI\_ISL\_663915  
VIC17545 EPI\_ISL\_663916  
VIC17546 EPI\_ISL\_663917  
VIC17547 EPI\_ISL\_663918  
VIC17549 EPI\_ISL\_663919  
VIC17551 EPI\_ISL\_663920  
VIC17554 EPI\_ISL\_663921  
VIC17555 EPI\_ISL\_663323  
VIC17556 EPI\_ISL\_663922  
VIC17558 EPI\_ISL\_663410  
VIC17559 EPI\_ISL\_663923  
VIC17560 EPI\_ISL\_663328  
VIC17563 EPI\_ISL\_663367  
VIC17564 EPI\_ISL\_663924  
VIC17566 EPI\_ISL\_663925  
VIC17567 EPI\_ISL\_663543  
VIC17568 EPI\_ISL\_663926  
VIC17569 EPI\_ISL\_663927  
VIC17570 EPI\_ISL\_663928  
VIC17572 EPI\_ISL\_663929  
VIC17574 EPI\_ISL\_663318  
VIC17576 EPI\_ISL\_663930  
VIC17578 EPI\_ISL\_663931  
VIC17582 EPI\_ISL\_663932  
VIC17585 EPI\_ISL\_663933  
VIC17586 EPI\_ISL\_663934  
VIC17587 EPI\_ISL\_663935  
VIC17588 EPI\_ISL\_663936  
VIC17589 EPI\_ISL\_663937  
VIC17590 EPI\_ISL\_663938  
VIC17591 EPI\_ISL\_663939  
VIC17595 EPI\_ISL\_663941  
VIC17596 EPI\_ISL\_663942  
VIC17599 EPI\_ISL\_663944  
VIC176 EPI\_ISL\_419873  
VIC17601 EPI\_ISL\_663354  
VIC17602 EPI\_ISL\_663945  
VIC17604 EPI\_ISL\_663324  
VIC17605 EPI\_ISL\_663946  
VIC17606 EPI\_ISL\_663439  
VIC17610 EPI\_ISL\_663298  
VIC17612 EPI\_ISL\_663309  
VIC17613 EPI\_ISL\_663948  
VIC17615 EPI\_ISL\_1033135  
VIC17616 EPI\_ISL\_663949  
VIC17617 EPI\_ISL\_663545  
VIC17619 EPI\_ISL\_1033136  
VIC17621 EPI\_ISL\_663951  
VIC17622 EPI\_ISL\_663952  
VIC17624 EPI\_ISL\_663953  
VIC17625 EPI\_ISL\_663954

VIC17626 EPI\_ISL\_663955  
VIC17628 EPI\_ISL\_663337  
VIC17629 EPI\_ISL\_663956  
VIC17631 EPI\_ISL\_663957  
VIC17633 EPI\_ISL\_663958  
VIC17634 EPI\_ISL\_663959  
VIC17636 EPI\_ISL\_663960  
VIC17639 EPI\_ISL\_663961  
VIC17641 EPI\_ISL\_663962  
VIC17642 EPI\_ISL\_663963  
VIC17643 EPI\_ISL\_1061401  
VIC17645 EPI\_ISL\_663964  
VIC17646 EPI\_ISL\_663965  
VIC17647 EPI\_ISL\_663966  
VIC17648 EPI\_ISL\_663967  
VIC17649 EPI\_ISL\_663968  
VIC17650 EPI\_ISL\_663969  
VIC17651 EPI\_ISL\_663970  
VIC17652 EPI\_ISL\_663971  
VIC17653 EPI\_ISL\_663972  
VIC17654 EPI\_ISL\_663973  
VIC17655 EPI\_ISL\_663974  
VIC17656 EPI\_ISL\_663975  
VIC17657 EPI\_ISL\_663976  
VIC17658 EPI\_ISL\_663977  
VIC17659 EPI\_ISL\_663978  
VIC17660 EPI\_ISL\_663979  
VIC17661 EPI\_ISL\_663980  
VIC17662 EPI\_ISL\_663981  
VIC17663 EPI\_ISL\_663982  
VIC17664 EPI\_ISL\_663983  
VIC17665 EPI\_ISL\_663984  
VIC17666 EPI\_ISL\_663985  
VIC17667 EPI\_ISL\_663370  
VIC17668 EPI\_ISL\_663986  
VIC17669 EPI\_ISL\_663987  
VIC17670 EPI\_ISL\_663988  
VIC17671 EPI\_ISL\_663989  
VIC17672 EPI\_ISL\_663990  
VIC17673 EPI\_ISL\_663422  
VIC17674 EPI\_ISL\_663302  
VIC17675 EPI\_ISL\_663991  
VIC17676 EPI\_ISL\_663362  
VIC17677 EPI\_ISL\_663992  
VIC17678 EPI\_ISL\_663993  
VIC17679 EPI\_ISL\_663353  
VIC17680 EPI\_ISL\_663994  
VIC17681 EPI\_ISL\_663995  
VIC17682 EPI\_ISL\_663996  
VIC17683 EPI\_ISL\_663392  
VIC17686 EPI\_ISL\_663997  
VIC17689 EPI\_ISL\_663998

VIC1769 EPI\_ISL\_456643  
VIC17692 EPI\_ISL\_663999  
VIC17695 EPI\_ISL\_664000  
VIC17696 EPI\_ISL\_664001  
VIC177 EPI\_ISL\_419874  
VIC17702 EPI\_ISL\_664002  
VIC17705 EPI\_ISL\_664003  
VIC17709 EPI\_ISL\_663355  
VIC17710 EPI\_ISL\_664004  
VIC17711 EPI\_ISL\_664005  
VIC17713 EPI\_ISL\_664007  
VIC17714 EPI\_ISL\_663430  
VIC17716 EPI\_ISL\_663348  
VIC17718 EPI\_ISL\_664008  
VIC17719 EPI\_ISL\_663436  
VIC17720 EPI\_ISL\_664009  
VIC17721 EPI\_ISL\_664010  
VIC17722 EPI\_ISL\_664011  
VIC17723 EPI\_ISL\_664012  
VIC17724 EPI\_ISL\_664013  
VIC17725 EPI\_ISL\_664014  
VIC17726 EPI\_ISL\_664015  
VIC17727 EPI\_ISL\_664016  
VIC17728 EPI\_ISL\_664017  
VIC17730 EPI\_ISL\_663400  
VIC17732 EPI\_ISL\_664018  
VIC17733 EPI\_ISL\_664019  
VIC17736 EPI\_ISL\_779415  
VIC17737 EPI\_ISL\_779416  
VIC17738 EPI\_ISL\_779417  
VIC17742 EPI\_ISL\_779418  
VIC17743 EPI\_ISL\_779419  
VIC17744 EPI\_ISL\_779420  
VIC17745 EPI\_ISL\_779421  
VIC17748 EPI\_ISL\_779422  
VIC1775 EPI\_ISL\_456644  
VIC17750 EPI\_ISL\_779423  
VIC17752 EPI\_ISL\_779425  
VIC17754 EPI\_ISL\_779426  
VIC17755 EPI\_ISL\_779427  
VIC17757 EPI\_ISL\_779428  
VIC17758 EPI\_ISL\_779429  
VIC17759 EPI\_ISL\_779430  
VIC17760 EPI\_ISL\_779431  
VIC17761 EPI\_ISL\_1033137  
VIC17764 EPI\_ISL\_779432  
VIC17765 EPI\_ISL\_779433  
VIC17766 EPI\_ISL\_779434  
VIC17770 EPI\_ISL\_779437  
VIC17772 EPI\_ISL\_779438  
VIC17774 EPI\_ISL\_779439  
VIC17775 EPI\_ISL\_779440

VIC17776 EPI\_ISL\_779441  
VIC17779 EPI\_ISL\_779444  
VIC17780 EPI\_ISL\_779445  
VIC17783 EPI\_ISL\_779448  
VIC17784 EPI\_ISL\_779449  
VIC17785 EPI\_ISL\_779450  
VIC17786 EPI\_ISL\_779451  
VIC17787 EPI\_ISL\_779452  
VIC17789 EPI\_ISL\_779453  
VIC17791 EPI\_ISL\_962817  
VIC17792 EPI\_ISL\_779455  
VIC17793 EPI\_ISL\_779456  
VIC17794 EPI\_ISL\_779457  
VIC17795 EPI\_ISL\_779458  
VIC17797 EPI\_ISL\_779460  
VIC17798 EPI\_ISL\_779461  
VIC17799 EPI\_ISL\_1033139  
VIC178 EPI\_ISL\_419875  
VIC17802 EPI\_ISL\_779463  
VIC17810 EPI\_ISL\_779467  
VIC17811 EPI\_ISL\_779468  
VIC17814 EPI\_ISL\_779469  
VIC17815 EPI\_ISL\_779470  
VIC17816 EPI\_ISL\_779471  
VIC17817 EPI\_ISL\_779472  
VIC17818 EPI\_ISL\_779473  
VIC17819 EPI\_ISL\_779474  
VIC1782 EPI\_ISL\_456645  
VIC17820 EPI\_ISL\_779475  
VIC17821 EPI\_ISL\_779476  
VIC17822 EPI\_ISL\_779477  
VIC17823 EPI\_ISL\_779478  
VIC17825 EPI\_ISL\_779480  
VIC17826 EPI\_ISL\_779481  
VIC17829 EPI\_ISL\_779482  
VIC17830 EPI\_ISL\_779483  
VIC17831 EPI\_ISL\_779484  
VIC17834 EPI\_ISL\_779486  
VIC17835 EPI\_ISL\_779487  
VIC17836 EPI\_ISL\_779488  
VIC17837 EPI\_ISL\_779489  
VIC17838 EPI\_ISL\_779490  
VIC17839 EPI\_ISL\_779491  
VIC1784 EPI\_ISL\_456647  
VIC17840 EPI\_ISL\_779492  
VIC17842 EPI\_ISL\_779493  
VIC17843 EPI\_ISL\_779494  
VIC17844 EPI\_ISL\_779495  
VIC17845 EPI\_ISL\_779496  
VIC17846 EPI\_ISL\_779497  
VIC17847 EPI\_ISL\_779498  
VIC17848 EPI\_ISL\_779499

VIC17850 EPI\_ISL\_779500  
VIC17851 EPI\_ISL\_779501  
VIC17852 EPI\_ISL\_779502  
VIC17853 EPI\_ISL\_779503  
VIC17854 Rejected  
VIC17855 EPI\_ISL\_779504  
VIC17856 EPI\_ISL\_779505  
VIC17857 EPI\_ISL\_779506  
VIC1786 EPI\_ISL\_456648  
VIC17860 EPI\_ISL\_779509  
VIC17861 EPI\_ISL\_779510  
VIC17862 EPI\_ISL\_779511  
VIC17864 EPI\_ISL\_779512  
VIC17865 EPI\_ISL\_779513  
VIC17866 EPI\_ISL\_779514  
VIC17867 EPI\_ISL\_779515  
VIC17869 EPI\_ISL\_779517  
VIC1787 EPI\_ISL\_456649  
VIC17870 EPI\_ISL\_779518  
VIC17871 EPI\_ISL\_779519  
VIC17872 EPI\_ISL\_779520  
VIC17873 EPI\_ISL\_779521  
VIC17874 EPI\_ISL\_779522  
VIC17875 EPI\_ISL\_779523  
VIC17876 EPI\_ISL\_779524  
VIC17877 EPI\_ISL\_779525  
VIC17879 EPI\_ISL\_779526  
VIC17880 EPI\_ISL\_779527  
VIC17881 EPI\_ISL\_779528  
VIC17882 EPI\_ISL\_779529  
VIC17883 EPI\_ISL\_779530  
VIC17884 EPI\_ISL\_779531  
VIC17885 EPI\_ISL\_779532  
VIC17887 EPI\_ISL\_779534  
VIC17889 EPI\_ISL\_779536  
VIC1789 EPI\_ISL\_456650  
VIC17891 EPI\_ISL\_779538  
VIC17892 Rejected  
VIC17893 EPI\_ISL\_779539  
VIC17894 EPI\_ISL\_779540  
VIC17895 EPI\_ISL\_779541  
VIC17896 EPI\_ISL\_779542  
VIC17897 EPI\_ISL\_779543  
VIC17898 EPI\_ISL\_779544  
VIC179 EPI\_ISL\_419876  
VIC17903 EPI\_ISL\_779546  
VIC17904 EPI\_ISL\_779547  
VIC17905 EPI\_ISL\_779548  
VIC17906 EPI\_ISL\_779549  
VIC17907 EPI\_ISL\_779550  
VIC17909 EPI\_ISL\_779551  
VIC1791 EPI\_ISL\_456651

VIC17911 EPI\_ISL\_779552  
VIC17914 EPI\_ISL\_779553  
VIC17916 EPI\_ISL\_779555  
VIC17917 EPI\_ISL\_779556  
VIC17919 EPI\_ISL\_779557  
VIC1792 EPI\_ISL\_456652  
VIC17920 EPI\_ISL\_779558  
VIC17921 EPI\_ISL\_779559  
VIC17923 EPI\_ISL\_779561  
VIC17924 EPI\_ISL\_779562  
VIC17925 EPI\_ISL\_779563  
VIC17928 EPI\_ISL\_779564  
VIC17929 EPI\_ISL\_779565  
VIC1793 EPI\_ISL\_456653  
VIC17930 EPI\_ISL\_779566  
VIC17931 EPI\_ISL\_779567  
VIC17932 EPI\_ISL\_779568  
VIC17937 EPI\_ISL\_779571  
VIC17939 EPI\_ISL\_779573  
VIC1794 EPI\_ISL\_456654  
VIC17940 EPI\_ISL\_779574  
VIC17941 EPI\_ISL\_779575  
VIC17942 EPI\_ISL\_779576  
VIC17943 EPI\_ISL\_779577  
VIC17944 EPI\_ISL\_779578  
VIC17945 EPI\_ISL\_779579  
VIC17947 EPI\_ISL\_779581  
VIC1795 EPI\_ISL\_456655  
VIC1796 EPI\_ISL\_480608  
VIC17962 Rejected  
VIC17963 EPI\_ISL\_779589  
VIC1798 EPI\_ISL\_480622  
VIC17990 EPI\_ISL\_779605  
VIC17991 EPI\_ISL\_779606  
VIC17992 EPI\_ISL\_779607  
VIC17996 EPI\_ISL\_779609  
VIC18 EPI\_ISL\_419737  
VIC180 EPI\_ISL\_419877  
VIC1800 EPI\_ISL\_480607  
VIC18001 EPI\_ISL\_779614  
VIC18002 EPI\_ISL\_779615  
VIC18003 EPI\_ISL\_779616  
VIC18004 EPI\_ISL\_779617  
VIC18006 EPI\_ISL\_779619  
VIC18007 EPI\_ISL\_779620  
VIC18009 EPI\_ISL\_779621  
VIC18010 EPI\_ISL\_779622  
VIC18012 EPI\_ISL\_779624  
VIC18013 EPI\_ISL\_779625  
VIC18016 EPI\_ISL\_779628  
VIC18017 EPI\_ISL\_779629  
VIC18020 EPI\_ISL\_779632

VIC18022 EPI\_ISL\_779633  
VIC18032 EPI\_ISL\_1061402  
VIC18034 EPI\_ISL\_779642  
VIC18036 EPI\_ISL\_779644  
VIC18038 EPI\_ISL\_779646  
VIC18041 EPI\_ISL\_779648  
VIC18042 EPI\_ISL\_779649  
VIC18044 EPI\_ISL\_962818  
VIC18048 EPI\_ISL\_962820  
VIC18049 EPI\_ISL\_962821  
VIC18054 EPI\_ISL\_962822  
VIC18058 EPI\_ISL\_812427  
VIC18060 EPI\_ISL\_812429  
VIC18062 EPI\_ISL\_812431  
VIC18064 EPI\_ISL\_812433  
VIC18065 EPI\_ISL\_812434  
VIC18066 EPI\_ISL\_812435  
VIC18067 EPI\_ISL\_812436  
VIC18075 EPI\_ISL\_962823  
VIC18081 EPI\_ISL\_812441  
VIC18082 EPI\_ISL\_812442  
VIC18086 EPI\_ISL\_854748  
VIC18087 EPI\_ISL\_854749  
VIC18089 EPI\_ISL\_854750  
VIC18091 EPI\_ISL\_854751  
VIC18092 EPI\_ISL\_854752  
VIC18093 EPI\_ISL\_854753  
VIC18095 EPI\_ISL\_854755  
VIC18098 EPI\_ISL\_854757  
VIC181 EPI\_ISL\_419878  
VIC18103 EPI\_ISL\_854758  
VIC18112 EPI\_ISL\_854762  
VIC18116 EPI\_ISL\_877566  
VIC18117 EPI\_ISL\_877567  
VIC18118 EPI\_ISL\_877568  
VIC18119 EPI\_ISL\_877569  
VIC18120 EPI\_ISL\_877570  
VIC18126 EPI\_ISL\_877571  
VIC18127 EPI\_ISL\_877572  
VIC18128 EPI\_ISL\_877573  
VIC18129 EPI\_ISL\_877574  
VIC18132 EPI\_ISL\_877575  
VIC18139 EPI\_ISL\_877576  
VIC18148 EPI\_ISL\_877579  
VIC18154 EPI\_ISL\_877580  
VIC18156 EPI\_ISL\_877581  
VIC18159 EPI\_ISL\_877582  
VIC18160 EPI\_ISL\_877583  
VIC18164 EPI\_ISL\_962828  
VIC18165 EPI\_ISL\_962829  
VIC18166 EPI\_ISL\_962830  
VIC18168 EPI\_ISL\_962831



VIC18169 EPI\_ISL\_962832  
VIC18186 EPI\_ISL\_933777  
VIC18195 EPI\_ISL\_933778  
VIC18199 EPI\_ISL\_979356  
VIC182 EPI\_ISL\_450212  
VIC1820 EPI\_ISL\_561722  
VIC18204 EPI\_ISL\_1061403  
VIC18210 EPI\_ISL\_979360  
VIC1822 EPI\_ISL\_521872  
VIC1823 EPI\_ISL\_521873  
VIC1824 EPI\_ISL\_521874  
VIC1825 EPI\_ISL\_521875  
VIC1826 EPI\_ISL\_521876  
VIC1828 EPI\_ISL\_521877  
VIC1829 EPI\_ISL\_521878  
VIC183 EPI\_ISL\_419879  
VIC1831 EPI\_ISL\_521879  
VIC1834 EPI\_ISL\_521880  
VIC1835 EPI\_ISL\_521881  
VIC1836 EPI\_ISL\_521882  
VIC1837 EPI\_ISL\_521883  
VIC1838 EPI\_ISL\_521884  
VIC184 EPI\_ISL\_419880  
VIC1843 EPI\_ISL\_521885  
VIC1845 EPI\_ISL\_521887  
VIC1847 EPI\_ISL\_480563  
VIC1848 EPI\_ISL\_480559  
VIC1849 EPI\_ISL\_480560  
VIC185 EPI\_ISL\_419881  
VIC1850 EPI\_ISL\_521888  
VIC1852 EPI\_ISL\_480561  
VIC186 EPI\_ISL\_419882  
VIC1866 EPI\_ISL\_480568  
VIC187 EPI\_ISL\_419883  
VIC1874 EPI\_ISL\_521890  
VIC1877 EPI\_ISL\_480567  
VIC188 EPI\_ISL\_419884  
VIC1881 EPI\_ISL\_480571  
VIC1882 EPI\_ISL\_480592  
VIC1883 EPI\_ISL\_480598  
VIC1886 EPI\_ISL\_480644  
VIC1887 EPI\_ISL\_480646  
VIC1888 EPI\_ISL\_480642  
VIC1889 EPI\_ISL\_480648  
VIC189 EPI\_ISL\_419885  
VIC1890 EPI\_ISL\_480643  
VIC1891 EPI\_ISL\_480641  
VIC1892 EPI\_ISL\_480649  
VIC1894 EPI\_ISL\_480650  
VIC1896 EPI\_ISL\_480652  
VIC1897 EPI\_ISL\_480651  
VIC1898 EPI\_ISL\_480645

|         |                |
|---------|----------------|
| VIC19   | EPI_ISL_419738 |
| VIC190  | EPI_ISL_419886 |
| VIC191  | EPI_ISL_419887 |
| VIC192  | EPI_ISL_419888 |
| VIC193  | EPI_ISL_419889 |
| VIC194  | EPI_ISL_419890 |
| VIC1944 | EPI_ISL_480669 |
| VIC1948 | EPI_ISL_480672 |
| VIC1949 | EPI_ISL_480673 |
| VIC195  | EPI_ISL_419891 |
| VIC1950 | EPI_ISL_480674 |
| VIC1951 | EPI_ISL_480675 |
| VIC1952 | EPI_ISL_480676 |
| VIC1953 | EPI_ISL_480677 |
| VIC1954 | EPI_ISL_480678 |
| VIC1955 | EPI_ISL_480679 |
| VIC1956 | EPI_ISL_480680 |
| VIC1957 | EPI_ISL_480681 |
| VIC1958 | EPI_ISL_480682 |
| VIC196  | EPI_ISL_419892 |
| VIC1960 | EPI_ISL_480683 |
| VIC1965 | EPI_ISL_480688 |
| VIC197  | EPI_ISL_419893 |
| VIC198  | EPI_ISL_419894 |
| VIC1984 | EPI_ISL_521895 |
| VIC199  | EPI_ISL_419895 |
| VIC1990 | EPI_ISL_521896 |
| VIC1991 | EPI_ISL_521897 |
| VIC1992 | EPI_ISL_521898 |
| VIC1993 | EPI_ISL_521899 |
| VIC1994 | EPI_ISL_521900 |
| VIC1995 | EPI_ISL_521901 |
| VIC1996 | EPI_ISL_521902 |
| VIC20   | EPI_ISL_419741 |
| VIC2007 | EPI_ISL_521904 |
| VIC201  | EPI_ISL_419896 |
| VIC2011 | EPI_ISL_480656 |
| VIC2012 | EPI_ISL_480654 |
| VIC2013 | EPI_ISL_480655 |
| VIC2018 | EPI_ISL_480660 |
| VIC202  | EPI_ISL_419897 |
| VIC2020 | EPI_ISL_480662 |
| VIC2021 | EPI_ISL_480663 |
| VIC2027 | EPI_ISL_480668 |
| VIC2029 | EPI_ISL_480657 |
| VIC203  | EPI_ISL_419898 |
| VIC2034 | EPI_ISL_480666 |
| VIC2036 | EPI_ISL_521905 |
| VIC2038 | EPI_ISL_480689 |
| VIC204  | EPI_ISL_419899 |
| VIC2043 | EPI_ISL_480747 |
| VIC2044 | EPI_ISL_480748 |

|         |                |
|---------|----------------|
| VIC2048 | EPI_ISL_480752 |
| VIC205  | EPI_ISL_419900 |
| VIC2050 | EPI_ISL_480754 |
| VIC2053 | EPI_ISL_480749 |
| VIC2055 | EPI_ISL_480751 |
| VIC2056 | EPI_ISL_480753 |
| VIC206  | EPI_ISL_419901 |
| VIC2060 | EPI_ISL_480746 |
| VIC2065 | EPI_ISL_480755 |
| VIC2066 | EPI_ISL_480756 |
| VIC2067 | EPI_ISL_480757 |
| VIC2068 | EPI_ISL_480759 |
| VIC2069 | EPI_ISL_480758 |
| VIC207  | EPI_ISL_419902 |
| VIC2075 | EPI_ISL_521910 |
| VIC2076 | EPI_ISL_480616 |
| VIC208  | EPI_ISL_419903 |
| VIC2082 | EPI_ISL_521913 |
| VIC2083 | EPI_ISL_521914 |
| VIC2086 | EPI_ISL_480698 |
| VIC2087 | EPI_ISL_480699 |
| VIC2088 | EPI_ISL_480700 |
| VIC2089 | EPI_ISL_480701 |
| VIC209  | EPI_ISL_419904 |
| VIC2090 | EPI_ISL_480702 |
| VIC2093 | EPI_ISL_480704 |
| VIC2098 | EPI_ISL_480707 |
| VIC2099 | EPI_ISL_480708 |
| VIC21   | EPI_ISL_419740 |
| VIC210  | EPI_ISL_419905 |
| VIC2101 | EPI_ISL_480709 |
| VIC2102 | EPI_ISL_480710 |
| VIC2108 | EPI_ISL_480715 |
| VIC211  | EPI_ISL_419906 |
| VIC2110 | EPI_ISL_480716 |
| VIC2111 | EPI_ISL_480717 |
| VIC2112 | EPI_ISL_480718 |
| VIC2117 | EPI_ISL_480722 |
| VIC2118 | EPI_ISL_480723 |
| VIC2119 | EPI_ISL_487271 |
| VIC212  | EPI_ISL_419907 |
| VIC2121 | EPI_ISL_480725 |
| VIC2123 | EPI_ISL_480726 |
| VIC2124 | EPI_ISL_480727 |
| VIC2126 | EPI_ISL_480735 |
| VIC2127 | EPI_ISL_480736 |
| VIC2129 | EPI_ISL_480728 |
| VIC213  | EPI_ISL_419908 |
| VIC2130 | EPI_ISL_480729 |
| VIC2132 | EPI_ISL_480730 |
| VIC2133 | EPI_ISL_480731 |
| VIC2134 | EPI_ISL_480732 |

|         |                |
|---------|----------------|
| VIC2135 | EPI_ISL_480733 |
| VIC2136 | EPI_ISL_480737 |
| VIC2137 | EPI_ISL_480738 |
| VIC2139 | EPI_ISL_480740 |
| VIC214  | EPI_ISL_419909 |
| VIC2140 | EPI_ISL_480741 |
| VIC2141 | EPI_ISL_480742 |
| VIC2143 | EPI_ISL_480744 |
| VIC2145 | EPI_ISL_521915 |
| VIC215  | EPI_ISL_419910 |
| VIC2150 | EPI_ISL_480766 |
| VIC2151 | EPI_ISL_480765 |
| VIC2154 | EPI_ISL_480763 |
| VIC2155 | EPI_ISL_480767 |
| VIC2156 | EPI_ISL_480769 |
| VIC2157 | EPI_ISL_480768 |
| VIC2158 | EPI_ISL_480761 |
| VIC2159 | EPI_ISL_480762 |
| VIC216  | EPI_ISL_419911 |
| VIC2160 | EPI_ISL_480760 |
| VIC2161 | EPI_ISL_480770 |
| VIC2162 | EPI_ISL_480777 |
| VIC2163 | EPI_ISL_480775 |
| VIC2164 | EPI_ISL_480771 |
| VIC2165 | EPI_ISL_480772 |
| VIC2166 | EPI_ISL_480773 |
| VIC2167 | EPI_ISL_480774 |
| VIC2169 | EPI_ISL_521918 |
| VIC217  | EPI_ISL_419912 |
| VIC2170 | EPI_ISL_521919 |
| VIC2173 | EPI_ISL_521922 |
| VIC2175 | EPI_ISL_521924 |
| VIC2176 | EPI_ISL_521925 |
| VIC218  | EPI_ISL_419913 |
| VIC2181 | EPI_ISL_521927 |
| VIC2182 | EPI_ISL_521928 |
| VIC2183 | EPI_ISL_521929 |
| VIC2184 | EPI_ISL_521930 |
| VIC2185 | EPI_ISL_521931 |
| VIC2186 | EPI_ISL_521932 |
| VIC2187 | EPI_ISL_521933 |
| VIC2188 | EPI_ISL_521934 |
| VIC2189 | EPI_ISL_521935 |
| VIC219  | EPI_ISL_419914 |
| VIC2190 | EPI_ISL_521936 |
| VIC2191 | EPI_ISL_521937 |
| VIC2192 | EPI_ISL_521938 |
| VIC2193 | EPI_ISL_521939 |
| VIC2194 | EPI_ISL_521940 |
| VIC2195 | EPI_ISL_521941 |
| VIC2196 | EPI_ISL_521942 |
| VIC2197 | EPI_ISL_521943 |

|         |                |
|---------|----------------|
| VIC2198 | EPI_ISL_521944 |
| VIC22   | EPI_ISL_419742 |
| VIC220  | EPI_ISL_419915 |
| VIC2202 | EPI_ISL_521945 |
| VIC2204 | EPI_ISL_521946 |
| VIC2205 | EPI_ISL_521947 |
| VIC2206 | EPI_ISL_521948 |
| VIC2207 | EPI_ISL_521949 |
| VIC2210 | EPI_ISL_521950 |
| VIC2211 | EPI_ISL_521951 |
| VIC2212 | EPI_ISL_521952 |
| VIC2213 | EPI_ISL_521953 |
| VIC2214 | EPI_ISL_521954 |
| VIC2216 | EPI_ISL_521956 |
| VIC2217 | EPI_ISL_521957 |
| VIC2220 | EPI_ISL_521959 |
| VIC2221 | EPI_ISL_521960 |
| VIC2224 | EPI_ISL_521961 |
| VIC2226 | EPI_ISL_521963 |
| VIC2227 | EPI_ISL_521964 |
| VIC2229 | EPI_ISL_521966 |
| VIC223  | EPI_ISL_419918 |
| VIC2230 | EPI_ISL_521967 |
| VIC2231 | EPI_ISL_521968 |
| VIC2232 | EPI_ISL_521969 |
| VIC2236 | EPI_ISL_521973 |
| VIC2237 | EPI_ISL_521974 |
| VIC224  | EPI_ISL_419919 |
| VIC2242 | EPI_ISL_521975 |
| VIC2243 | EPI_ISL_521976 |
| VIC2244 | EPI_ISL_521977 |
| VIC2245 | EPI_ISL_521978 |
| VIC225  | EPI_ISL_419920 |
| VIC2250 | EPI_ISL_521981 |
| VIC2251 | EPI_ISL_521982 |
| VIC2255 | EPI_ISL_521984 |
| VIC2256 | EPI_ISL_521985 |
| VIC2257 | EPI_ISL_521986 |
| VIC2258 | EPI_ISL_521987 |
| VIC226  | EPI_ISL_419921 |
| VIC2261 | EPI_ISL_521989 |
| VIC2268 | EPI_ISL_521990 |
| VIC2269 | EPI_ISL_521991 |
| VIC227  | EPI_ISL_419922 |
| VIC2270 | EPI_ISL_521992 |
| VIC2271 | EPI_ISL_521993 |
| VIC2272 | EPI_ISL_521994 |
| VIC2273 | EPI_ISL_521995 |
| VIC2274 | EPI_ISL_521996 |
| VIC2275 | EPI_ISL_521997 |
| VIC2276 | EPI_ISL_521998 |
| VIC2277 | EPI_ISL_521999 |

|         |                |
|---------|----------------|
| VIC2278 | EPI_ISL_522000 |
| VIC2279 | EPI_ISL_522001 |
| VIC228  | EPI_ISL_419923 |
| VIC2280 | EPI_ISL_522002 |
| VIC2281 | EPI_ISL_522003 |
| VIC2282 | EPI_ISL_522004 |
| VIC2283 | EPI_ISL_522005 |
| VIC2284 | EPI_ISL_522006 |
| VIC2285 | EPI_ISL_522007 |
| VIC2286 | EPI_ISL_522008 |
| VIC2287 | EPI_ISL_522009 |
| VIC2288 | EPI_ISL_522010 |
| VIC2289 | EPI_ISL_522011 |
| VIC229  | EPI_ISL_419924 |
| VIC2290 | EPI_ISL_522012 |
| VIC2291 | EPI_ISL_522013 |
| VIC2294 | EPI_ISL_522015 |
| VIC2295 | EPI_ISL_522016 |
| VIC2297 | EPI_ISL_522018 |
| VIC2298 | EPI_ISL_522019 |
| VIC2299 | EPI_ISL_522020 |
| VIC23   | EPI_ISL_419743 |
| VIC230  | EPI_ISL_419925 |
| VIC2300 | EPI_ISL_522021 |
| VIC2301 | EPI_ISL_522022 |
| VIC2302 | EPI_ISL_522023 |
| VIC2303 | EPI_ISL_522024 |
| VIC2304 | EPI_ISL_522025 |
| VIC2306 | EPI_ISL_522027 |
| VIC2308 | EPI_ISL_522029 |
| VIC2309 | EPI_ISL_522030 |
| VIC231  | EPI_ISL_419926 |
| VIC2310 | EPI_ISL_522031 |
| VIC2311 | EPI_ISL_522032 |
| VIC2312 | EPI_ISL_522033 |
| VIC2313 | EPI_ISL_522034 |
| VIC2315 | EPI_ISL_522036 |
| VIC2316 | EPI_ISL_522037 |
| VIC2317 | EPI_ISL_522038 |
| VIC2318 | EPI_ISL_522039 |
| VIC2319 | EPI_ISL_522040 |
| VIC232  | EPI_ISL_419927 |
| VIC2320 | EPI_ISL_522041 |
| VIC2321 | EPI_ISL_522042 |
| VIC2322 | EPI_ISL_522043 |
| VIC2323 | EPI_ISL_522044 |
| VIC2324 | EPI_ISL_522045 |
| VIC2325 | EPI_ISL_522046 |
| VIC2326 | EPI_ISL_522047 |
| VIC2327 | EPI_ISL_522048 |
| VIC2328 | EPI_ISL_522049 |
| VIC2329 | EPI_ISL_522050 |

|         |                |
|---------|----------------|
| VIC233  | EPI_ISL_419928 |
| VIC2330 | EPI_ISL_522051 |
| VIC2331 | EPI_ISL_522052 |
| VIC2332 | EPI_ISL_522053 |
| VIC2333 | EPI_ISL_522054 |
| VIC2334 | EPI_ISL_522055 |
| VIC2335 | EPI_ISL_522056 |
| VIC2336 | EPI_ISL_522057 |
| VIC2337 | EPI_ISL_522058 |
| VIC2338 | EPI_ISL_522059 |
| VIC2339 | EPI_ISL_522060 |
| VIC234  | EPI_ISL_419929 |
| VIC2340 | EPI_ISL_522061 |
| VIC2341 | EPI_ISL_522062 |
| VIC2342 | EPI_ISL_522063 |
| VIC2343 | EPI_ISL_522064 |
| VIC2344 | EPI_ISL_522065 |
| VIC2345 | EPI_ISL_522066 |
| VIC2347 | EPI_ISL_522068 |
| VIC2349 | EPI_ISL_522069 |
| VIC2350 | EPI_ISL_522070 |
| VIC2351 | EPI_ISL_522071 |
| VIC2353 | EPI_ISL_522073 |
| VIC2354 | EPI_ISL_522074 |
| VIC2355 | EPI_ISL_522075 |
| VIC2356 | EPI_ISL_522076 |
| VIC2357 | EPI_ISL_522077 |
| VIC2358 | EPI_ISL_522078 |
| VIC2359 | EPI_ISL_522079 |
| VIC236  | EPI_ISL_419931 |
| VIC2360 | EPI_ISL_522080 |
| VIC2361 | EPI_ISL_522081 |
| VIC2362 | EPI_ISL_522082 |
| VIC2363 | EPI_ISL_522083 |
| VIC2364 | EPI_ISL_522084 |
| VIC2365 | EPI_ISL_522085 |
| VIC2366 | EPI_ISL_522086 |
| VIC2367 | EPI_ISL_522087 |
| VIC2368 | EPI_ISL_522088 |
| VIC2369 | EPI_ISL_522089 |
| VIC237  | EPI_ISL_419932 |
| VIC2370 | EPI_ISL_522090 |
| VIC2371 | EPI_ISL_522091 |
| VIC2373 | EPI_ISL_522093 |
| VIC2374 | EPI_ISL_522094 |
| VIC2376 | EPI_ISL_522096 |
| VIC2377 | EPI_ISL_522097 |
| VIC2378 | EPI_ISL_522098 |
| VIC2379 | EPI_ISL_522099 |
| VIC238  | EPI_ISL_419933 |
| VIC2381 | EPI_ISL_522100 |
| VIC2384 | EPI_ISL_522102 |

|         |                |
|---------|----------------|
| VIC2385 | EPI_ISL_522103 |
| VIC2386 | EPI_ISL_522104 |
| VIC2387 | EPI_ISL_522105 |
| VIC2388 | EPI_ISL_522106 |
| VIC2389 | EPI_ISL_522107 |
| VIC239  | EPI_ISL_419934 |
| VIC2390 | EPI_ISL_522108 |
| VIC2392 | EPI_ISL_522109 |
| VIC2395 | EPI_ISL_522112 |
| VIC2397 | EPI_ISL_522113 |
| VIC2398 | EPI_ISL_522114 |
| VIC2399 | EPI_ISL_522115 |
| VIC240  | EPI_ISL_419935 |
| VIC2400 | EPI_ISL_522116 |
| VIC2401 | EPI_ISL_522117 |
| VIC2402 | EPI_ISL_522118 |
| VIC2409 | EPI_ISL_522120 |
| VIC241  | EPI_ISL_419936 |
| VIC2410 | EPI_ISL_522121 |
| VIC2411 | EPI_ISL_522122 |
| VIC2412 | EPI_ISL_522123 |
| VIC2413 | EPI_ISL_522124 |
| VIC2414 | EPI_ISL_522125 |
| VIC2415 | EPI_ISL_522126 |
| VIC2416 | EPI_ISL_522127 |
| VIC2417 | EPI_ISL_522128 |
| VIC2418 | EPI_ISL_522129 |
| VIC242  | EPI_ISL_419937 |
| VIC2420 | EPI_ISL_522130 |
| VIC2422 | EPI_ISL_522132 |
| VIC2423 | EPI_ISL_522133 |
| VIC2424 | EPI_ISL_522134 |
| VIC2425 | EPI_ISL_522135 |
| VIC2426 | EPI_ISL_522136 |
| VIC2427 | EPI_ISL_522137 |
| VIC2429 | EPI_ISL_522138 |
| VIC243  | EPI_ISL_419938 |
| VIC2430 | EPI_ISL_522139 |
| VIC2431 | EPI_ISL_522140 |
| VIC2432 | EPI_ISL_522141 |
| VIC2433 | EPI_ISL_522142 |
| VIC2435 | EPI_ISL_522143 |
| VIC2439 | EPI_ISL_522145 |
| VIC244  | EPI_ISL_419939 |
| VIC2440 | EPI_ISL_522146 |
| VIC2441 | EPI_ISL_522147 |
| VIC2442 | EPI_ISL_522148 |
| VIC2443 | EPI_ISL_522149 |
| VIC2444 | EPI_ISL_522150 |
| VIC2445 | EPI_ISL_522151 |
| VIC2446 | EPI_ISL_522152 |
| VIC2447 | EPI_ISL_522153 |



|         |                |
|---------|----------------|
| VIC2448 | EPI_ISL_522154 |
| VIC2449 | EPI_ISL_522155 |
| VIC245  | EPI_ISL_419940 |
| VIC2451 | EPI_ISL_522157 |
| VIC2452 | EPI_ISL_522158 |
| VIC2453 | EPI_ISL_522159 |
| VIC2454 | EPI_ISL_522160 |
| VIC2455 | EPI_ISL_522161 |
| VIC2456 | EPI_ISL_522162 |
| VIC2457 | EPI_ISL_522163 |
| VIC2458 | EPI_ISL_522164 |
| VIC2459 | EPI_ISL_522165 |
| VIC246  | EPI_ISL_419941 |
| VIC2460 | EPI_ISL_522166 |
| VIC2462 | EPI_ISL_522168 |
| VIC2463 | EPI_ISL_522169 |
| VIC2464 | EPI_ISL_522170 |
| VIC2468 | EPI_ISL_522171 |
| VIC2469 | EPI_ISL_522172 |
| VIC247  | EPI_ISL_419942 |
| VIC2470 | EPI_ISL_522173 |
| VIC2471 | EPI_ISL_522174 |
| VIC2472 | EPI_ISL_522175 |
| VIC2473 | EPI_ISL_522176 |
| VIC2474 | EPI_ISL_522177 |
| VIC2475 | EPI_ISL_522178 |
| VIC2476 | EPI_ISL_522179 |
| VIC2477 | EPI_ISL_522180 |
| VIC2478 | EPI_ISL_522181 |
| VIC2479 | EPI_ISL_522182 |
| VIC248  | EPI_ISL_419943 |
| VIC2480 | EPI_ISL_522183 |
| VIC2481 | EPI_ISL_522184 |
| VIC2483 | EPI_ISL_522185 |
| VIC2484 | EPI_ISL_522186 |
| VIC2489 | EPI_ISL_522187 |
| VIC249  | EPI_ISL_419944 |
| VIC2490 | EPI_ISL_522188 |
| VIC2491 | EPI_ISL_522189 |
| VIC2492 | EPI_ISL_522190 |
| VIC2493 | EPI_ISL_522191 |
| VIC2494 | EPI_ISL_522192 |
| VIC2495 | EPI_ISL_522193 |
| VIC2496 | EPI_ISL_522194 |
| VIC2497 | EPI_ISL_522195 |
| VIC2499 | EPI_ISL_522196 |
| VIC25   | EPI_ISL_419744 |
| VIC250  | EPI_ISL_419945 |
| VIC2500 | EPI_ISL_522197 |
| VIC2501 | EPI_ISL_522198 |
| VIC2502 | EPI_ISL_522199 |
| VIC2506 | EPI_ISL_522201 |

|         |                |
|---------|----------------|
| VIC2507 | EPI_ISL_522202 |
| VIC2508 | EPI_ISL_522203 |
| VIC2509 | EPI_ISL_522204 |
| VIC251  | EPI_ISL_419946 |
| VIC2510 | EPI_ISL_522205 |
| VIC2511 | EPI_ISL_522206 |
| VIC2512 | EPI_ISL_522207 |
| VIC2513 | EPI_ISL_522208 |
| VIC2514 | EPI_ISL_522209 |
| VIC2515 | EPI_ISL_522210 |
| VIC2516 | EPI_ISL_522211 |
| VIC2517 | EPI_ISL_522212 |
| VIC2518 | EPI_ISL_522213 |
| VIC2519 | EPI_ISL_522214 |
| VIC252  | EPI_ISL_419947 |
| VIC2520 | EPI_ISL_522215 |
| VIC2521 | EPI_ISL_563984 |
| VIC2522 | EPI_ISL_522216 |
| VIC2523 | EPI_ISL_522217 |
| VIC2524 | EPI_ISL_522218 |
| VIC2525 | EPI_ISL_522219 |
| VIC2527 | EPI_ISL_522220 |
| VIC2528 | EPI_ISL_522221 |
| VIC2529 | EPI_ISL_522222 |
| VIC253  | EPI_ISL_419948 |
| VIC2530 | EPI_ISL_522223 |
| VIC2531 | EPI_ISL_522224 |
| VIC2532 | EPI_ISL_522225 |
| VIC2533 | EPI_ISL_522226 |
| VIC2534 | EPI_ISL_522227 |
| VIC2535 | EPI_ISL_522228 |
| VIC2536 | EPI_ISL_522229 |
| VIC2537 | EPI_ISL_522230 |
| VIC2538 | EPI_ISL_522231 |
| VIC254  | EPI_ISL_419949 |
| VIC2546 | EPI_ISL_522233 |
| VIC2547 | EPI_ISL_522234 |
| VIC2548 | EPI_ISL_522235 |
| VIC2549 | EPI_ISL_522236 |
| VIC255  | Rejected       |
| VIC2550 | EPI_ISL_522237 |
| VIC2551 | EPI_ISL_522238 |
| VIC2553 | EPI_ISL_522239 |
| VIC2554 | EPI_ISL_522240 |
| VIC2557 | EPI_ISL_522241 |
| VIC2559 | EPI_ISL_522243 |
| VIC256  | EPI_ISL_420036 |
| VIC2561 | EPI_ISL_522245 |
| VIC2569 | EPI_ISL_522247 |
| VIC257  | EPI_ISL_419950 |
| VIC2570 | EPI_ISL_522248 |
| VIC2571 | EPI_ISL_522249 |

|         |                |
|---------|----------------|
| VIC2572 | EPI_ISL_522250 |
| VIC2574 | EPI_ISL_522252 |
| VIC2575 | EPI_ISL_522253 |
| VIC2577 | EPI_ISL_521452 |
| VIC2578 | EPI_ISL_521453 |
| VIC2579 | EPI_ISL_521454 |
| VIC258  | EPI_ISL_419951 |
| VIC2580 | EPI_ISL_521455 |
| VIC2582 | EPI_ISL_521456 |
| VIC2583 | EPI_ISL_521457 |
| VIC2584 | EPI_ISL_521458 |
| VIC2586 | EPI_ISL_521459 |
| VIC2587 | EPI_ISL_521460 |
| VIC2588 | EPI_ISL_521461 |
| VIC259  | EPI_ISL_419952 |
| VIC26   | EPI_ISL_419745 |
| VIC260  | EPI_ISL_419953 |
| VIC261  | EPI_ISL_419954 |
| VIC2611 | EPI_ISL_521463 |
| VIC2612 | EPI_ISL_521464 |
| VIC2613 | EPI_ISL_521465 |
| VIC2617 | EPI_ISL_521466 |
| VIC2620 | EPI_ISL_521467 |
| VIC2622 | EPI_ISL_521468 |
| VIC2623 | EPI_ISL_521469 |
| VIC2624 | EPI_ISL_521470 |
| VIC2625 | EPI_ISL_521471 |
| VIC2626 | EPI_ISL_521472 |
| VIC2627 | EPI_ISL_521473 |
| VIC2628 | EPI_ISL_521474 |
| VIC2629 | EPI_ISL_521475 |
| VIC263  | EPI_ISL_419956 |
| VIC2630 | EPI_ISL_521476 |
| VIC2631 | EPI_ISL_521477 |
| VIC2632 | EPI_ISL_521478 |
| VIC2633 | EPI_ISL_521479 |
| VIC2634 | EPI_ISL_521480 |
| VIC2635 | EPI_ISL_521481 |
| VIC2636 | EPI_ISL_521482 |
| VIC2637 | EPI_ISL_521483 |
| VIC2638 | EPI_ISL_521484 |
| VIC2639 | EPI_ISL_521485 |
| VIC264  | EPI_ISL_419957 |
| VIC2640 | EPI_ISL_521486 |
| VIC2641 | EPI_ISL_521487 |
| VIC2642 | EPI_ISL_521488 |
| VIC2643 | EPI_ISL_521489 |
| VIC2644 | EPI_ISL_521490 |
| VIC2645 | EPI_ISL_521491 |
| VIC2646 | EPI_ISL_521492 |
| VIC2647 | EPI_ISL_521493 |
| VIC2648 | EPI_ISL_521494 |

|         |                |
|---------|----------------|
| VIC2649 | EPI_ISL_521495 |
| VIC265  | EPI_ISL_419958 |
| VIC2650 | EPI_ISL_521496 |
| VIC2651 | EPI_ISL_521497 |
| VIC2652 | EPI_ISL_521498 |
| VIC2653 | EPI_ISL_521499 |
| VIC2654 | EPI_ISL_521500 |
| VIC2656 | EPI_ISL_521502 |
| VIC2657 | EPI_ISL_521503 |
| VIC2658 | EPI_ISL_521504 |
| VIC2659 | EPI_ISL_521505 |
| VIC266  | EPI_ISL_419959 |
| VIC2660 | EPI_ISL_521506 |
| VIC2661 | EPI_ISL_521507 |
| VIC2664 | EPI_ISL_521508 |
| VIC2667 | EPI_ISL_521509 |
| VIC2668 | EPI_ISL_521510 |
| VIC2669 | EPI_ISL_521511 |
| VIC267  | EPI_ISL_419960 |
| VIC2670 | EPI_ISL_521512 |
| VIC2672 | EPI_ISL_521514 |
| VIC2673 | EPI_ISL_521515 |
| VIC2676 | EPI_ISL_521517 |
| VIC2677 | EPI_ISL_521518 |
| VIC2678 | EPI_ISL_521519 |
| VIC2679 | EPI_ISL_521520 |
| VIC268  | EPI_ISL_419961 |
| VIC2680 | EPI_ISL_521521 |
| VIC2681 | EPI_ISL_521522 |
| VIC2682 | EPI_ISL_521523 |
| VIC2683 | EPI_ISL_521524 |
| VIC2684 | EPI_ISL_521525 |
| VIC2686 | EPI_ISL_521527 |
| VIC2687 | EPI_ISL_521528 |
| VIC269  | EPI_ISL_419962 |
| VIC2693 | EPI_ISL_521533 |
| VIC2694 | EPI_ISL_521534 |
| VIC2695 | EPI_ISL_521535 |
| VIC2696 | EPI_ISL_521536 |
| VIC2698 | EPI_ISL_521537 |
| VIC2699 | EPI_ISL_521538 |
| VIC27   | EPI_ISL_419746 |
| VIC270  | EPI_ISL_419963 |
| VIC2700 | EPI_ISL_521539 |
| VIC2701 | EPI_ISL_521540 |
| VIC2703 | EPI_ISL_521541 |
| VIC2704 | EPI_ISL_521542 |
| VIC2705 | EPI_ISL_521543 |
| VIC2707 | EPI_ISL_521545 |
| VIC2709 | EPI_ISL_521547 |
| VIC271  | EPI_ISL_419964 |
| VIC2710 | EPI_ISL_521548 |

|         |                |
|---------|----------------|
| VIC2711 | EPI_ISL_521549 |
| VIC2712 | EPI_ISL_521550 |
| VIC2713 | EPI_ISL_521551 |
| VIC2714 | EPI_ISL_521552 |
| VIC2715 | Rejected       |
| VIC2716 | EPI_ISL_521553 |
| VIC2717 | EPI_ISL_521554 |
| VIC2718 | EPI_ISL_521555 |
| VIC2719 | EPI_ISL_521556 |
| VIC272  | EPI_ISL_419965 |
| VIC2720 | EPI_ISL_521557 |
| VIC2721 | EPI_ISL_521558 |
| VIC2722 | EPI_ISL_521559 |
| VIC2723 | EPI_ISL_521560 |
| VIC2724 | EPI_ISL_521561 |
| VIC2727 | EPI_ISL_521562 |
| VIC2728 | EPI_ISL_521563 |
| VIC2729 | EPI_ISL_521564 |
| VIC273  | EPI_ISL_419966 |
| VIC2730 | EPI_ISL_521565 |
| VIC2731 | EPI_ISL_521566 |
| VIC2732 | EPI_ISL_521567 |
| VIC2733 | EPI_ISL_521568 |
| VIC2734 | EPI_ISL_521569 |
| VIC2735 | EPI_ISL_521570 |
| VIC2736 | EPI_ISL_521571 |
| VIC2737 | EPI_ISL_521572 |
| VIC2738 | EPI_ISL_521573 |
| VIC2739 | EPI_ISL_521574 |
| VIC274  | EPI_ISL_419967 |
| VIC2740 | EPI_ISL_521575 |
| VIC2741 | EPI_ISL_521576 |
| VIC2742 | EPI_ISL_521577 |
| VIC2743 | EPI_ISL_521578 |
| VIC2744 | EPI_ISL_521579 |
| VIC2745 | EPI_ISL_521580 |
| VIC2746 | EPI_ISL_521581 |
| VIC2747 | EPI_ISL_521582 |
| VIC2748 | EPI_ISL_521583 |
| VIC2749 | EPI_ISL_521584 |
| VIC275  | EPI_ISL_419968 |
| VIC2750 | EPI_ISL_521585 |
| VIC2751 | EPI_ISL_521586 |
| VIC2752 | EPI_ISL_521587 |
| VIC2753 | EPI_ISL_521588 |
| VIC2754 | EPI_ISL_521589 |
| VIC2755 | EPI_ISL_521590 |
| VIC2756 | EPI_ISL_521591 |
| VIC2757 | EPI_ISL_521592 |
| VIC2758 | EPI_ISL_521593 |
| VIC2759 | EPI_ISL_521594 |
| VIC276  | EPI_ISL_419969 |

|         |                |
|---------|----------------|
| VIC2760 | EPI_ISL_521595 |
| VIC2761 | EPI_ISL_521596 |
| VIC2762 | EPI_ISL_521597 |
| VIC2763 | EPI_ISL_521598 |
| VIC2764 | EPI_ISL_521599 |
| VIC2765 | EPI_ISL_521600 |
| VIC2766 | EPI_ISL_521601 |
| VIC2767 | EPI_ISL_521602 |
| VIC2768 | EPI_ISL_521603 |
| VIC2769 | EPI_ISL_521604 |
| VIC277  | EPI_ISL_419970 |
| VIC2770 | EPI_ISL_521605 |
| VIC2771 | EPI_ISL_521606 |
| VIC2772 | EPI_ISL_521607 |
| VIC2773 | EPI_ISL_521608 |
| VIC2774 | EPI_ISL_521609 |
| VIC2776 | EPI_ISL_521610 |
| VIC2777 | EPI_ISL_521611 |
| VIC2778 | EPI_ISL_521612 |
| VIC2779 | EPI_ISL_521613 |
| VIC278  | EPI_ISL_419971 |
| VIC2780 | EPI_ISL_521614 |
| VIC2781 | EPI_ISL_521615 |
| VIC2782 | EPI_ISL_521616 |
| VIC2783 | EPI_ISL_521617 |
| VIC2784 | EPI_ISL_521618 |
| VIC2785 | EPI_ISL_521619 |
| VIC2786 | EPI_ISL_521620 |
| VIC2787 | EPI_ISL_521621 |
| VIC2788 | EPI_ISL_521622 |
| VIC2789 | EPI_ISL_521623 |
| VIC279  | EPI_ISL_419972 |
| VIC2790 | EPI_ISL_521624 |
| VIC2793 | EPI_ISL_521626 |
| VIC2794 | EPI_ISL_521627 |
| VIC2795 | EPI_ISL_521628 |
| VIC2796 | EPI_ISL_521629 |
| VIC2797 | EPI_ISL_521630 |
| VIC28   | EPI_ISL_419747 |
| VIC280  | EPI_ISL_419973 |
| VIC2800 | EPI_ISL_521631 |
| VIC2801 | EPI_ISL_521632 |
| VIC2802 | EPI_ISL_521633 |
| VIC2803 | EPI_ISL_521634 |
| VIC2804 | EPI_ISL_521635 |
| VIC2805 | EPI_ISL_521636 |
| VIC2806 | EPI_ISL_521637 |
| VIC2807 | EPI_ISL_521638 |
| VIC2808 | EPI_ISL_521639 |
| VIC2809 | EPI_ISL_521640 |
| VIC281  | Rejected       |
| VIC2810 | EPI_ISL_521641 |

|         |                |
|---------|----------------|
| VIC2811 | EPI_ISL_521642 |
| VIC2812 | EPI_ISL_521643 |
| VIC2813 | EPI_ISL_521644 |
| VIC2814 | EPI_ISL_521645 |
| VIC2815 | EPI_ISL_521646 |
| VIC2816 | EPI_ISL_521647 |
| VIC2817 | EPI_ISL_521648 |
| VIC2818 | EPI_ISL_521649 |
| VIC2819 | EPI_ISL_521650 |
| VIC282  | Rejected       |
| VIC2820 | EPI_ISL_521651 |
| VIC2821 | EPI_ISL_521652 |
| VIC2822 | EPI_ISL_521653 |
| VIC2823 | EPI_ISL_521654 |
| VIC2824 | EPI_ISL_521655 |
| VIC2825 | EPI_ISL_521656 |
| VIC2826 | EPI_ISL_521657 |
| VIC2827 | EPI_ISL_521658 |
| VIC2828 | EPI_ISL_521659 |
| VIC2829 | EPI_ISL_521660 |
| VIC283  | EPI_ISL_419974 |
| VIC2830 | EPI_ISL_521661 |
| VIC2831 | EPI_ISL_521662 |
| VIC2833 | EPI_ISL_521664 |
| VIC2834 | EPI_ISL_521665 |
| VIC2835 | EPI_ISL_521666 |
| VIC2836 | EPI_ISL_521667 |
| VIC2837 | EPI_ISL_521668 |
| VIC2838 | EPI_ISL_521669 |
| VIC2839 | EPI_ISL_521670 |
| VIC284  | EPI_ISL_419975 |
| VIC2840 | EPI_ISL_521671 |
| VIC2841 | EPI_ISL_521672 |
| VIC2842 | EPI_ISL_521673 |
| VIC2843 | EPI_ISL_521674 |
| VIC2844 | EPI_ISL_521675 |
| VIC2845 | EPI_ISL_521676 |
| VIC2846 | EPI_ISL_521677 |
| VIC2847 | EPI_ISL_521678 |
| VIC2848 | EPI_ISL_521679 |
| VIC2849 | EPI_ISL_521680 |
| VIC285  | EPI_ISL_419976 |
| VIC2850 | EPI_ISL_521681 |
| VIC2851 | EPI_ISL_521682 |
| VIC2852 | EPI_ISL_521683 |
| VIC2853 | EPI_ISL_521684 |
| VIC2854 | EPI_ISL_521685 |
| VIC2855 | EPI_ISL_521686 |
| VIC2856 | EPI_ISL_521687 |
| VIC2857 | EPI_ISL_521688 |
| VIC2858 | EPI_ISL_521689 |
| VIC2859 | EPI_ISL_521690 |

|         |                |
|---------|----------------|
| VIC286  | EPI_ISL_419977 |
| VIC2860 | EPI_ISL_521691 |
| VIC2861 | EPI_ISL_521692 |
| VIC2862 | EPI_ISL_521693 |
| VIC2863 | EPI_ISL_521694 |
| VIC2864 | EPI_ISL_521695 |
| VIC2865 | EPI_ISL_521696 |
| VIC2866 | EPI_ISL_521697 |
| VIC2867 | EPI_ISL_521698 |
| VIC2868 | EPI_ISL_521699 |
| VIC2869 | EPI_ISL_521700 |
| VIC287  | EPI_ISL_419978 |
| VIC2870 | EPI_ISL_521701 |
| VIC2871 | EPI_ISL_521702 |
| VIC2872 | EPI_ISL_521703 |
| VIC2873 | EPI_ISL_521704 |
| VIC2874 | EPI_ISL_521705 |
| VIC2875 | EPI_ISL_521706 |
| VIC2876 | EPI_ISL_521707 |
| VIC2877 | EPI_ISL_521708 |
| VIC2878 | EPI_ISL_521709 |
| VIC2879 | EPI_ISL_521710 |
| VIC288  | EPI_ISL_419979 |
| VIC2880 | EPI_ISL_521711 |
| VIC2881 | EPI_ISL_521712 |
| VIC2882 | EPI_ISL_521713 |
| VIC2883 | EPI_ISL_521714 |
| VIC2884 | EPI_ISL_521715 |
| VIC2885 | EPI_ISL_521716 |
| VIC2886 | EPI_ISL_521717 |
| VIC2887 | EPI_ISL_521718 |
| VIC2888 | EPI_ISL_521719 |
| VIC2889 | EPI_ISL_521720 |
| VIC289  | EPI_ISL_419980 |
| VIC2890 | EPI_ISL_521721 |
| VIC2891 | EPI_ISL_521722 |
| VIC2892 | EPI_ISL_521723 |
| VIC2893 | EPI_ISL_521724 |
| VIC2894 | EPI_ISL_521725 |
| VIC2895 | EPI_ISL_521726 |
| VIC2896 | EPI_ISL_521727 |
| VIC2897 | EPI_ISL_521728 |
| VIC2898 | EPI_ISL_521729 |
| VIC2899 | EPI_ISL_521730 |
| VIC29   | EPI_ISL_419748 |
| VIC2901 | EPI_ISL_521732 |
| VIC2902 | EPI_ISL_521733 |
| VIC2903 | EPI_ISL_521734 |
| VIC2904 | EPI_ISL_521735 |
| VIC2905 | EPI_ISL_521736 |
| VIC2906 | EPI_ISL_521737 |
| VIC2907 | EPI_ISL_521738 |



|         |                |
|---------|----------------|
| VIC2908 | EPI_ISL_521739 |
| VIC2909 | EPI_ISL_521740 |
| VIC2910 | EPI_ISL_521741 |
| VIC2911 | EPI_ISL_521742 |
| VIC2912 | EPI_ISL_521743 |
| VIC2913 | EPI_ISL_521744 |
| VIC2914 | EPI_ISL_521745 |
| VIC2915 | EPI_ISL_521746 |
| VIC2916 | EPI_ISL_521747 |
| VIC2917 | EPI_ISL_521748 |
| VIC2918 | EPI_ISL_521749 |
| VIC2919 | EPI_ISL_521750 |
| VIC292  | EPI_ISL_419983 |
| VIC2920 | EPI_ISL_521751 |
| VIC2921 | EPI_ISL_521752 |
| VIC2922 | EPI_ISL_521753 |
| VIC2923 | EPI_ISL_521754 |
| VIC2924 | EPI_ISL_521755 |
| VIC2925 | EPI_ISL_521756 |
| VIC2926 | EPI_ISL_521757 |
| VIC2928 | EPI_ISL_521759 |
| VIC2929 | EPI_ISL_521760 |
| VIC293  | EPI_ISL_419984 |
| VIC2930 | EPI_ISL_521761 |
| VIC2931 | EPI_ISL_521762 |
| VIC2932 | EPI_ISL_521763 |
| VIC2933 | EPI_ISL_521764 |
| VIC2934 | EPI_ISL_521765 |
| VIC2935 | EPI_ISL_521766 |
| VIC2936 | EPI_ISL_521767 |
| VIC2937 | EPI_ISL_521768 |
| VIC2938 | EPI_ISL_521769 |
| VIC294  | EPI_ISL_419985 |
| VIC2940 | EPI_ISL_521770 |
| VIC2941 | EPI_ISL_521771 |
| VIC2942 | EPI_ISL_521772 |
| VIC2943 | EPI_ISL_521773 |
| VIC2944 | EPI_ISL_521774 |
| VIC2945 | EPI_ISL_521775 |
| VIC2946 | EPI_ISL_521776 |
| VIC2947 | EPI_ISL_521777 |
| VIC2948 | EPI_ISL_521778 |
| VIC2949 | EPI_ISL_521779 |
| VIC295  | EPI_ISL_419986 |
| VIC2950 | EPI_ISL_521780 |
| VIC2951 | EPI_ISL_521781 |
| VIC2952 | EPI_ISL_521782 |
| VIC2953 | EPI_ISL_521783 |
| VIC2954 | EPI_ISL_521784 |
| VIC2955 | EPI_ISL_521785 |
| VIC2956 | EPI_ISL_521786 |
| VIC2957 | EPI_ISL_521787 |

|         |                |
|---------|----------------|
| VIC2959 | EPI_ISL_521789 |
| VIC296  | EPI_ISL_419987 |
| VIC2960 | EPI_ISL_521790 |
| VIC2961 | EPI_ISL_521791 |
| VIC2962 | EPI_ISL_521792 |
| VIC2963 | EPI_ISL_521793 |
| VIC2964 | EPI_ISL_521794 |
| VIC2965 | EPI_ISL_521795 |
| VIC2966 | EPI_ISL_521796 |
| VIC2967 | EPI_ISL_521797 |
| VIC2968 | EPI_ISL_521798 |
| VIC2969 | EPI_ISL_521799 |
| VIC297  | EPI_ISL_419988 |
| VIC2970 | EPI_ISL_521800 |
| VIC2971 | EPI_ISL_521801 |
| VIC2972 | EPI_ISL_521802 |
| VIC2973 | EPI_ISL_521803 |
| VIC2974 | EPI_ISL_521804 |
| VIC2976 | EPI_ISL_521806 |
| VIC2977 | EPI_ISL_521807 |
| VIC2978 | EPI_ISL_521808 |
| VIC2979 | EPI_ISL_521809 |
| VIC298  | EPI_ISL_419989 |
| VIC2981 | EPI_ISL_521811 |
| VIC2983 | EPI_ISL_521813 |
| VIC2984 | EPI_ISL_521814 |
| VIC2985 | EPI_ISL_521815 |
| VIC2986 | EPI_ISL_521816 |
| VIC2987 | EPI_ISL_521817 |
| VIC2988 | EPI_ISL_521818 |
| VIC2989 | EPI_ISL_521819 |
| VIC299  | EPI_ISL_419990 |
| VIC2990 | EPI_ISL_521820 |
| VIC2991 | EPI_ISL_521821 |
| VIC2993 | EPI_ISL_521823 |
| VIC2994 | EPI_ISL_521824 |
| VIC2995 | EPI_ISL_521825 |
| VIC2996 | EPI_ISL_521826 |
| VIC2997 | EPI_ISL_521827 |
| VIC2998 | EPI_ISL_521828 |
| VIC2999 | EPI_ISL_521829 |
| VIC30   | EPI_ISL_419749 |
| VIC300  | EPI_ISL_419991 |
| VIC3000 | EPI_ISL_521830 |
| VIC3001 | EPI_ISL_521831 |
| VIC3002 | EPI_ISL_521832 |
| VIC3003 | EPI_ISL_521833 |
| VIC3004 | EPI_ISL_521834 |
| VIC3005 | EPI_ISL_521835 |
| VIC3006 | EPI_ISL_521836 |
| VIC3007 | EPI_ISL_521837 |
| VIC3008 | EPI_ISL_521838 |

|         |                |
|---------|----------------|
| VIC3009 | EPI_ISL_521839 |
| VIC301  | EPI_ISL_419992 |
| VIC3012 | EPI_ISL_521841 |
| VIC3013 | EPI_ISL_521842 |
| VIC3014 | EPI_ISL_521843 |
| VIC3015 | EPI_ISL_521844 |
| VIC3016 | EPI_ISL_521845 |
| VIC3017 | EPI_ISL_521846 |
| VIC3018 | EPI_ISL_521847 |
| VIC302  | EPI_ISL_419993 |
| VIC3020 | EPI_ISL_521849 |
| VIC3021 | EPI_ISL_521850 |
| VIC3022 | EPI_ISL_521851 |
| VIC3023 | EPI_ISL_521852 |
| VIC3024 | EPI_ISL_521853 |
| VIC3025 | EPI_ISL_521854 |
| VIC3026 | EPI_ISL_521855 |
| VIC3027 | EPI_ISL_521856 |
| VIC3028 | EPI_ISL_521857 |
| VIC3029 | EPI_ISL_521858 |
| VIC303  | EPI_ISL_419994 |
| VIC3030 | EPI_ISL_521859 |
| VIC3031 | EPI_ISL_520745 |
| VIC3032 | EPI_ISL_520746 |
| VIC3033 | EPI_ISL_520747 |
| VIC3035 | EPI_ISL_520748 |
| VIC3036 | EPI_ISL_520749 |
| VIC3037 | EPI_ISL_520750 |
| VIC3038 | EPI_ISL_520751 |
| VIC3039 | EPI_ISL_520752 |
| VIC304  | EPI_ISL_419995 |
| VIC3040 | EPI_ISL_520753 |
| VIC3041 | EPI_ISL_520754 |
| VIC3042 | EPI_ISL_520755 |
| VIC3043 | EPI_ISL_520756 |
| VIC3044 | EPI_ISL_520757 |
| VIC3045 | EPI_ISL_520758 |
| VIC3046 | EPI_ISL_520759 |
| VIC3047 | EPI_ISL_520760 |
| VIC3048 | EPI_ISL_520761 |
| VIC3049 | EPI_ISL_520762 |
| VIC305  | EPI_ISL_419996 |
| VIC3054 | EPI_ISL_520764 |
| VIC3058 | EPI_ISL_520765 |
| VIC3059 | EPI_ISL_520766 |
| VIC3060 | EPI_ISL_520767 |
| VIC3061 | EPI_ISL_520768 |
| VIC3062 | EPI_ISL_520769 |
| VIC3063 | EPI_ISL_520770 |
| VIC3064 | EPI_ISL_520771 |
| VIC3065 | EPI_ISL_520772 |
| VIC3066 | EPI_ISL_520773 |

|         |                |
|---------|----------------|
| VIC3067 | EPI_ISL_520774 |
| VIC3068 | Rejected       |
| VIC3069 | EPI_ISL_520776 |
| VIC307  | EPI_ISL_419998 |
| VIC3070 | EPI_ISL_520777 |
| VIC3071 | EPI_ISL_520778 |
| VIC3072 | EPI_ISL_520779 |
| VIC3073 | EPI_ISL_520780 |
| VIC3074 | EPI_ISL_520781 |
| VIC3075 | EPI_ISL_520782 |
| VIC3076 | EPI_ISL_520783 |
| VIC3077 | EPI_ISL_520784 |
| VIC3078 | EPI_ISL_520785 |
| VIC3079 | EPI_ISL_520786 |
| VIC308  | EPI_ISL_419999 |
| VIC3080 | EPI_ISL_520787 |
| VIC3081 | EPI_ISL_520788 |
| VIC3082 | EPI_ISL_520789 |
| VIC3083 | EPI_ISL_520790 |
| VIC3084 | EPI_ISL_520791 |
| VIC3085 | EPI_ISL_520792 |
| VIC3086 | EPI_ISL_520793 |
| VIC3087 | EPI_ISL_520794 |
| VIC3088 | EPI_ISL_520795 |
| VIC3089 | EPI_ISL_520796 |
| VIC309  | EPI_ISL_420000 |
| VIC3090 | EPI_ISL_520797 |
| VIC3091 | EPI_ISL_520798 |
| VIC3092 | EPI_ISL_520799 |
| VIC3093 | EPI_ISL_520800 |
| VIC3094 | EPI_ISL_520801 |
| VIC3095 | EPI_ISL_520802 |
| VIC3096 | EPI_ISL_520803 |
| VIC3097 | EPI_ISL_520804 |
| VIC3098 | EPI_ISL_520805 |
| VIC3099 | EPI_ISL_520806 |
| VIC31   | EPI_ISL_419750 |
| VIC310  | EPI_ISL_420001 |
| VIC3100 | EPI_ISL_520807 |
| VIC3101 | EPI_ISL_520808 |
| VIC3102 | EPI_ISL_520809 |
| VIC3103 | EPI_ISL_520810 |
| VIC3104 | EPI_ISL_520811 |
| VIC3105 | EPI_ISL_520812 |
| VIC3106 | EPI_ISL_520813 |
| VIC3107 | EPI_ISL_520814 |
| VIC3108 | EPI_ISL_520815 |
| VIC3109 | EPI_ISL_520816 |
| VIC311  | EPI_ISL_420002 |
| VIC3111 | EPI_ISL_520818 |
| VIC3112 | EPI_ISL_520819 |
| VIC3113 | EPI_ISL_520820 |

|         |                |
|---------|----------------|
| VIC3114 | EPI_ISL_520821 |
| VIC3115 | EPI_ISL_520822 |
| VIC3116 | EPI_ISL_520823 |
| VIC3117 | EPI_ISL_520824 |
| VIC3118 | EPI_ISL_520825 |
| VIC3119 | EPI_ISL_520826 |
| VIC312  | EPI_ISL_420003 |
| VIC3120 | EPI_ISL_520827 |
| VIC3121 | EPI_ISL_520828 |
| VIC3122 | EPI_ISL_520829 |
| VIC3123 | EPI_ISL_520830 |
| VIC3124 | EPI_ISL_520831 |
| VIC3125 | EPI_ISL_520832 |
| VIC3126 | EPI_ISL_520833 |
| VIC3127 | EPI_ISL_520834 |
| VIC3128 | EPI_ISL_520835 |
| VIC3129 | EPI_ISL_520836 |
| VIC3130 | EPI_ISL_520837 |
| VIC3131 | EPI_ISL_520838 |
| VIC3133 | EPI_ISL_520840 |
| VIC3134 | EPI_ISL_520841 |
| VIC3136 | EPI_ISL_520843 |
| VIC3137 | EPI_ISL_520844 |
| VIC3138 | EPI_ISL_520845 |
| VIC3139 | EPI_ISL_520846 |
| VIC3141 | EPI_ISL_520848 |
| VIC3142 | EPI_ISL_520849 |
| VIC3143 | EPI_ISL_520850 |
| VIC3144 | EPI_ISL_520851 |
| VIC3145 | EPI_ISL_520852 |
| VIC3146 | EPI_ISL_520853 |
| VIC3147 | Rejected       |
| VIC3148 | EPI_ISL_520854 |
| VIC3149 | EPI_ISL_520855 |
| VIC315  | EPI_ISL_420006 |
| VIC3150 | EPI_ISL_520856 |
| VIC3151 | EPI_ISL_520857 |
| VIC3152 | EPI_ISL_520858 |
| VIC3153 | EPI_ISL_520859 |
| VIC3154 | EPI_ISL_520860 |
| VIC3155 | EPI_ISL_520861 |
| VIC3156 | EPI_ISL_520862 |
| VIC3157 | EPI_ISL_520863 |
| VIC316  | EPI_ISL_420007 |
| VIC317  | EPI_ISL_420008 |
| VIC3172 | EPI_ISL_520864 |
| VIC3173 | EPI_ISL_520865 |
| VIC3174 | EPI_ISL_520866 |
| VIC3176 | EPI_ISL_520867 |
| VIC3177 | EPI_ISL_520868 |
| VIC3178 | EPI_ISL_520869 |
| VIC3179 | EPI_ISL_520870 |

|         |                |
|---------|----------------|
| VIC318  | EPI_ISL_420009 |
| VIC3181 | EPI_ISL_520871 |
| VIC3182 | EPI_ISL_520872 |
| VIC3186 | EPI_ISL_520873 |
| VIC3187 | EPI_ISL_520874 |
| VIC3188 | EPI_ISL_520875 |
| VIC3189 | EPI_ISL_520876 |
| VIC319  | EPI_ISL_420010 |
| VIC3190 | EPI_ISL_520877 |
| VIC3192 | EPI_ISL_520878 |
| VIC3193 | EPI_ISL_520879 |
| VIC3194 | EPI_ISL_520880 |
| VIC3195 | EPI_ISL_520881 |
| VIC3196 | EPI_ISL_520882 |
| VIC32   | EPI_ISL_419751 |
| VIC320  | EPI_ISL_420011 |
| VIC3201 | EPI_ISL_520887 |
| VIC3202 | EPI_ISL_520888 |
| VIC3203 | EPI_ISL_520889 |
| VIC3204 | EPI_ISL_520890 |
| VIC3205 | EPI_ISL_520891 |
| VIC3206 | EPI_ISL_520892 |
| VIC3207 | EPI_ISL_520893 |
| VIC3208 | EPI_ISL_520894 |
| VIC3209 | EPI_ISL_520895 |
| VIC321  | EPI_ISL_420012 |
| VIC3210 | EPI_ISL_520896 |
| VIC3211 | EPI_ISL_520897 |
| VIC3212 | EPI_ISL_520898 |
| VIC3214 | EPI_ISL_520899 |
| VIC3215 | EPI_ISL_520900 |
| VIC3216 | EPI_ISL_520901 |
| VIC3217 | EPI_ISL_520902 |
| VIC3218 | EPI_ISL_520903 |
| VIC3219 | EPI_ISL_520904 |
| VIC322  | EPI_ISL_420013 |
| VIC3220 | EPI_ISL_520905 |
| VIC3221 | Rejected       |
| VIC3223 | EPI_ISL_520906 |
| VIC3224 | EPI_ISL_520907 |
| VIC3225 | EPI_ISL_520908 |
| VIC3226 | EPI_ISL_520909 |
| VIC3227 | EPI_ISL_520910 |
| VIC3228 | EPI_ISL_520911 |
| VIC3229 | EPI_ISL_520912 |
| VIC323  | EPI_ISL_420014 |
| VIC3230 | EPI_ISL_520913 |
| VIC3231 | EPI_ISL_520914 |
| VIC3233 | EPI_ISL_520915 |
| VIC324  | EPI_ISL_420015 |
| VIC3240 | EPI_ISL_520921 |
| VIC3241 | EPI_ISL_520922 |

|         |                |
|---------|----------------|
| VIC3242 | EPI_ISL_520923 |
| VIC3243 | EPI_ISL_520924 |
| VIC3249 | EPI_ISL_520929 |
| VIC325  | EPI_ISL_420016 |
| VIC3250 | EPI_ISL_520930 |
| VIC3251 | EPI_ISL_520931 |
| VIC3252 | EPI_ISL_520932 |
| VIC3253 | EPI_ISL_520933 |
| VIC3254 | EPI_ISL_520934 |
| VIC3255 | EPI_ISL_520935 |
| VIC3256 | EPI_ISL_520936 |
| VIC3257 | EPI_ISL_520937 |
| VIC3258 | Rejected       |
| VIC3259 | EPI_ISL_520938 |
| VIC326  | EPI_ISL_420017 |
| VIC3260 | EPI_ISL_520939 |
| VIC3261 | EPI_ISL_520940 |
| VIC3262 | EPI_ISL_520941 |
| VIC3263 | EPI_ISL_520942 |
| VIC3264 | EPI_ISL_520943 |
| VIC3265 | EPI_ISL_520944 |
| VIC3266 | EPI_ISL_520945 |
| VIC3267 | EPI_ISL_520946 |
| VIC3268 | EPI_ISL_520947 |
| VIC3269 | EPI_ISL_520948 |
| VIC327  | EPI_ISL_426637 |
| VIC3270 | EPI_ISL_520949 |
| VIC3271 | EPI_ISL_520950 |
| VIC3272 | EPI_ISL_520951 |
| VIC3273 | EPI_ISL_520952 |
| VIC3274 | EPI_ISL_520953 |
| VIC3275 | EPI_ISL_520954 |
| VIC3276 | EPI_ISL_520955 |
| VIC3277 | EPI_ISL_520956 |
| VIC3278 | EPI_ISL_520957 |
| VIC3279 | EPI_ISL_520958 |
| VIC328  | EPI_ISL_426638 |
| VIC3280 | EPI_ISL_520959 |
| VIC3281 | EPI_ISL_520960 |
| VIC3283 | EPI_ISL_520962 |
| VIC3284 | EPI_ISL_520963 |
| VIC3285 | EPI_ISL_520964 |
| VIC3286 | EPI_ISL_520965 |
| VIC3287 | EPI_ISL_520966 |
| VIC3288 | EPI_ISL_520967 |
| VIC3289 | EPI_ISL_520968 |
| VIC3290 | EPI_ISL_520969 |
| VIC3291 | EPI_ISL_520970 |
| VIC3292 | EPI_ISL_520971 |
| VIC3293 | EPI_ISL_520972 |
| VIC3294 | EPI_ISL_520973 |
| VIC3295 | EPI_ISL_520974 |

|         |                |
|---------|----------------|
| VIC3296 | EPI_ISL_520975 |
| VIC3297 | EPI_ISL_520976 |
| VIC3298 | EPI_ISL_520977 |
| VIC3299 | EPI_ISL_520978 |
| VIC33   | EPI_ISL_419752 |
| VIC330  | EPI_ISL_426640 |
| VIC3300 | EPI_ISL_520979 |
| VIC3301 | EPI_ISL_520980 |
| VIC3302 | EPI_ISL_520981 |
| VIC3303 | EPI_ISL_520982 |
| VIC3304 | EPI_ISL_520983 |
| VIC3305 | EPI_ISL_520984 |
| VIC3307 | EPI_ISL_520986 |
| VIC3308 | EPI_ISL_520987 |
| VIC3309 | EPI_ISL_520988 |
| VIC3310 | EPI_ISL_520989 |
| VIC3312 | EPI_ISL_520991 |
| VIC3313 | EPI_ISL_520992 |
| VIC3314 | EPI_ISL_520993 |
| VIC3315 | EPI_ISL_520994 |
| VIC3316 | EPI_ISL_520995 |
| VIC3317 | EPI_ISL_520996 |
| VIC3318 | EPI_ISL_520997 |
| VIC3319 | EPI_ISL_520998 |
| VIC332  | EPI_ISL_426641 |
| VIC3320 | EPI_ISL_520999 |
| VIC3321 | EPI_ISL_521000 |
| VIC3322 | EPI_ISL_521001 |
| VIC3323 | EPI_ISL_521002 |
| VIC3324 | EPI_ISL_521003 |
| VIC3325 | EPI_ISL_521004 |
| VIC3326 | EPI_ISL_521005 |
| VIC3327 | EPI_ISL_521006 |
| VIC3328 | EPI_ISL_521007 |
| VIC3329 | EPI_ISL_521008 |
| VIC3330 | EPI_ISL_521009 |
| VIC3331 | EPI_ISL_521010 |
| VIC3332 | EPI_ISL_521011 |
| VIC3333 | EPI_ISL_521012 |
| VIC3334 | EPI_ISL_521013 |
| VIC3335 | EPI_ISL_521014 |
| VIC3336 | EPI_ISL_521015 |
| VIC3337 | EPI_ISL_521016 |
| VIC3338 | EPI_ISL_521017 |
| VIC3339 | EPI_ISL_521018 |
| VIC334  | EPI_ISL_426643 |
| VIC3340 | EPI_ISL_521019 |
| VIC3341 | EPI_ISL_521020 |
| VIC3342 | EPI_ISL_521021 |
| VIC3343 | EPI_ISL_521022 |
| VIC3344 | EPI_ISL_521023 |
| VIC3345 | EPI_ISL_521024 |



|         |                |
|---------|----------------|
| VIC3346 | EPI_ISL_521025 |
| VIC3347 | EPI_ISL_521026 |
| VIC3348 | EPI_ISL_521027 |
| VIC3349 | EPI_ISL_521028 |
| VIC335  | EPI_ISL_426644 |
| VIC3350 | EPI_ISL_521029 |
| VIC3351 | EPI_ISL_521030 |
| VIC3352 | EPI_ISL_521031 |
| VIC3353 | EPI_ISL_521032 |
| VIC3354 | EPI_ISL_521033 |
| VIC3355 | EPI_ISL_521034 |
| VIC3356 | EPI_ISL_521035 |
| VIC3357 | EPI_ISL_521036 |
| VIC3358 | EPI_ISL_521037 |
| VIC3359 | EPI_ISL_521038 |
| VIC336  | EPI_ISL_426645 |
| VIC3360 | EPI_ISL_521039 |
| VIC3361 | EPI_ISL_521040 |
| VIC3362 | EPI_ISL_521041 |
| VIC3363 | EPI_ISL_521042 |
| VIC3364 | EPI_ISL_521043 |
| VIC3365 | EPI_ISL_521044 |
| VIC3366 | EPI_ISL_521045 |
| VIC3367 | EPI_ISL_521046 |
| VIC3368 | EPI_ISL_521047 |
| VIC3369 | EPI_ISL_521048 |
| VIC337  | EPI_ISL_426646 |
| VIC3370 | EPI_ISL_521049 |
| VIC3371 | EPI_ISL_521050 |
| VIC3372 | EPI_ISL_521051 |
| VIC3373 | EPI_ISL_521052 |
| VIC3374 | EPI_ISL_521053 |
| VIC3375 | EPI_ISL_521054 |
| VIC3376 | EPI_ISL_521055 |
| VIC3377 | EPI_ISL_521056 |
| VIC3378 | EPI_ISL_521057 |
| VIC3379 | EPI_ISL_521058 |
| VIC338  | EPI_ISL_426647 |
| VIC3380 | EPI_ISL_521059 |
| VIC3381 | EPI_ISL_521060 |
| VIC3382 | EPI_ISL_521061 |
| VIC3383 | EPI_ISL_521062 |
| VIC3384 | EPI_ISL_521063 |
| VIC3385 | EPI_ISL_521064 |
| VIC3386 | EPI_ISL_521065 |
| VIC3387 | EPI_ISL_521066 |
| VIC3388 | EPI_ISL_521067 |
| VIC3389 | EPI_ISL_521068 |
| VIC339  | EPI_ISL_426648 |
| VIC3390 | EPI_ISL_521069 |
| VIC3391 | EPI_ISL_521070 |
| VIC3392 | EPI_ISL_521071 |

|         |                |
|---------|----------------|
| VIC3393 | EPI_ISL_521072 |
| VIC3394 | EPI_ISL_521073 |
| VIC3395 | EPI_ISL_521074 |
| VIC3396 | EPI_ISL_521075 |
| VIC3397 | EPI_ISL_521076 |
| VIC3398 | EPI_ISL_521077 |
| VIC3399 | EPI_ISL_521078 |
| VIC34   | EPI_ISL_419753 |
| VIC340  | EPI_ISL_426649 |
| VIC3400 | EPI_ISL_521079 |
| VIC3401 | EPI_ISL_521080 |
| VIC3402 | EPI_ISL_521081 |
| VIC3403 | EPI_ISL_521082 |
| VIC3404 | EPI_ISL_521083 |
| VIC3405 | EPI_ISL_521084 |
| VIC3406 | EPI_ISL_521085 |
| VIC3407 | EPI_ISL_521086 |
| VIC3409 | EPI_ISL_521087 |
| VIC341  | EPI_ISL_426650 |
| VIC3415 | EPI_ISL_521089 |
| VIC3416 | EPI_ISL_521090 |
| VIC3417 | EPI_ISL_521091 |
| VIC3418 | EPI_ISL_521092 |
| VIC3419 | EPI_ISL_521093 |
| VIC342  | EPI_ISL_426651 |
| VIC3420 | EPI_ISL_521094 |
| VIC3421 | Rejected       |
| VIC3424 | EPI_ISL_521095 |
| VIC3425 | EPI_ISL_521096 |
| VIC3427 | EPI_ISL_521097 |
| VIC3428 | EPI_ISL_521098 |
| VIC3429 | EPI_ISL_521099 |
| VIC343  | EPI_ISL_426652 |
| VIC3430 | EPI_ISL_521100 |
| VIC3431 | EPI_ISL_521101 |
| VIC3433 | EPI_ISL_521102 |
| VIC3435 | EPI_ISL_521104 |
| VIC3438 | EPI_ISL_521105 |
| VIC344  | EPI_ISL_426653 |
| VIC3440 | EPI_ISL_521106 |
| VIC3441 | EPI_ISL_521107 |
| VIC3442 | EPI_ISL_521108 |
| VIC3444 | EPI_ISL_521110 |
| VIC3445 | EPI_ISL_521111 |
| VIC3446 | EPI_ISL_521112 |
| VIC3448 | EPI_ISL_521114 |
| VIC3449 | EPI_ISL_521115 |
| VIC345  | EPI_ISL_426654 |
| VIC3451 | EPI_ISL_521116 |
| VIC3452 | EPI_ISL_521117 |
| VIC3454 | EPI_ISL_521118 |
| VIC3455 | EPI_ISL_521119 |

|         |                |
|---------|----------------|
| VIC3457 | EPI_ISL_521121 |
| VIC3459 | EPI_ISL_521123 |
| VIC346  | EPI_ISL_426655 |
| VIC3462 | EPI_ISL_521125 |
| VIC3465 | EPI_ISL_521128 |
| VIC347  | EPI_ISL_426656 |
| VIC3470 | EPI_ISL_521131 |
| VIC3472 | EPI_ISL_521133 |
| VIC3473 | EPI_ISL_521134 |
| VIC3475 | EPI_ISL_521136 |
| VIC3476 | EPI_ISL_521137 |
| VIC3477 | EPI_ISL_521138 |
| VIC3478 | EPI_ISL_521139 |
| VIC3479 | EPI_ISL_521140 |
| VIC348  | EPI_ISL_426657 |
| VIC3480 | EPI_ISL_521141 |
| VIC3481 | EPI_ISL_521142 |
| VIC3482 | EPI_ISL_521143 |
| VIC3483 | EPI_ISL_521144 |
| VIC3484 | EPI_ISL_521145 |
| VIC3485 | EPI_ISL_521146 |
| VIC3486 | EPI_ISL_521147 |
| VIC3487 | EPI_ISL_521148 |
| VIC349  | EPI_ISL_450213 |
| VIC3490 | EPI_ISL_521150 |
| VIC3491 | EPI_ISL_521151 |
| VIC3492 | EPI_ISL_521152 |
| VIC3493 | EPI_ISL_520249 |
| VIC3494 | EPI_ISL_520250 |
| VIC3495 | EPI_ISL_520251 |
| VIC3496 | EPI_ISL_520252 |
| VIC3498 | EPI_ISL_520254 |
| VIC3499 | EPI_ISL_520255 |
| VIC35   | EPI_ISL_419755 |
| VIC350  | EPI_ISL_426658 |
| VIC3500 | EPI_ISL_520256 |
| VIC3501 | EPI_ISL_520257 |
| VIC3504 | EPI_ISL_520259 |
| VIC3505 | EPI_ISL_520260 |
| VIC3506 | EPI_ISL_520261 |
| VIC3507 | EPI_ISL_520262 |
| VIC3508 | EPI_ISL_520263 |
| VIC3509 | EPI_ISL_520264 |
| VIC351  | EPI_ISL_426659 |
| VIC3510 | Rejected       |
| VIC3511 | EPI_ISL_520265 |
| VIC3512 | EPI_ISL_593476 |
| VIC3514 | EPI_ISL_520267 |
| VIC3516 | EPI_ISL_520268 |
| VIC3519 | EPI_ISL_520271 |
| VIC3520 | EPI_ISL_520272 |
| VIC3521 | EPI_ISL_520273 |

|         |                |
|---------|----------------|
| VIC3522 | EPI_ISL_520274 |
| VIC3524 | EPI_ISL_520275 |
| VIC3528 | EPI_ISL_520277 |
| VIC3529 | EPI_ISL_520278 |
| VIC353  | EPI_ISL_426661 |
| VIC3530 | EPI_ISL_520279 |
| VIC3531 | EPI_ISL_520280 |
| VIC3532 | EPI_ISL_520281 |
| VIC3533 | EPI_ISL_520282 |
| VIC3534 | EPI_ISL_520283 |
| VIC3535 | EPI_ISL_520284 |
| VIC3538 | EPI_ISL_520287 |
| VIC354  | EPI_ISL_426662 |
| VIC3540 | EPI_ISL_520289 |
| VIC3541 | EPI_ISL_520290 |
| VIC3542 | EPI_ISL_520291 |
| VIC3543 | EPI_ISL_520292 |
| VIC3544 | EPI_ISL_520293 |
| VIC3545 | EPI_ISL_520294 |
| VIC3546 | EPI_ISL_520295 |
| VIC3547 | EPI_ISL_520296 |
| VIC3548 | EPI_ISL_520297 |
| VIC355  | EPI_ISL_426663 |
| VIC3551 | EPI_ISL_520300 |
| VIC3553 | EPI_ISL_520302 |
| VIC3554 | EPI_ISL_520303 |
| VIC3555 | EPI_ISL_520304 |
| VIC3556 | EPI_ISL_520305 |
| VIC3557 | EPI_ISL_520306 |
| VIC3559 | EPI_ISL_520308 |
| VIC356  | EPI_ISL_426664 |
| VIC3560 | EPI_ISL_520309 |
| VIC3562 | EPI_ISL_520311 |
| VIC3563 | EPI_ISL_520312 |
| VIC3564 | EPI_ISL_520313 |
| VIC3565 | EPI_ISL_520314 |
| VIC3566 | EPI_ISL_520315 |
| VIC3567 | EPI_ISL_520316 |
| VIC3568 | EPI_ISL_520317 |
| VIC357  | EPI_ISL_426665 |
| VIC3570 | EPI_ISL_520319 |
| VIC3571 | EPI_ISL_520320 |
| VIC3573 | EPI_ISL_520322 |
| VIC3574 | EPI_ISL_520323 |
| VIC3576 | EPI_ISL_520325 |
| VIC3577 | EPI_ISL_520326 |
| VIC3578 | EPI_ISL_520327 |
| VIC3580 | EPI_ISL_520328 |
| VIC3581 | EPI_ISL_520329 |
| VIC3583 | EPI_ISL_520331 |
| VIC3584 | EPI_ISL_520332 |
| VIC3585 | EPI_ISL_520333 |

|         |                |
|---------|----------------|
| VIC3588 | EPI_ISL_520334 |
| VIC3589 | EPI_ISL_520335 |
| VIC359  | EPI_ISL_426667 |
| VIC3590 | EPI_ISL_520336 |
| VIC3592 | EPI_ISL_520338 |
| VIC3593 | EPI_ISL_520339 |
| VIC3594 | EPI_ISL_520340 |
| VIC3595 | EPI_ISL_520341 |
| VIC3596 | EPI_ISL_520342 |
| VIC3597 | EPI_ISL_520343 |
| VIC3598 | EPI_ISL_520344 |
| VIC3599 | EPI_ISL_520345 |
| VIC36   | EPI_ISL_419765 |
| VIC3601 | EPI_ISL_520346 |
| VIC3602 | EPI_ISL_520347 |
| VIC3604 | EPI_ISL_520349 |
| VIC3605 | EPI_ISL_593477 |
| VIC3606 | EPI_ISL_520350 |
| VIC3607 | EPI_ISL_520351 |
| VIC3608 | EPI_ISL_520352 |
| VIC3609 | EPI_ISL_520353 |
| VIC361  | EPI_ISL_426669 |
| VIC3610 | EPI_ISL_520354 |
| VIC3613 | EPI_ISL_520356 |
| VIC3614 | EPI_ISL_520357 |
| VIC3615 | EPI_ISL_520358 |
| VIC3618 | EPI_ISL_520360 |
| VIC3619 | EPI_ISL_520361 |
| VIC362  | EPI_ISL_426670 |
| VIC3620 | EPI_ISL_520362 |
| VIC3621 | EPI_ISL_520363 |
| VIC3622 | EPI_ISL_520364 |
| VIC3623 | EPI_ISL_520365 |
| VIC3624 | EPI_ISL_520366 |
| VIC3626 | EPI_ISL_520367 |
| VIC3627 | EPI_ISL_520368 |
| VIC3628 | EPI_ISL_520369 |
| VIC3629 | EPI_ISL_520370 |
| VIC363  | EPI_ISL_426671 |
| VIC3630 | EPI_ISL_520371 |
| VIC3632 | EPI_ISL_520372 |
| VIC3634 | EPI_ISL_520374 |
| VIC3635 | EPI_ISL_520375 |
| VIC3637 | EPI_ISL_520377 |
| VIC3639 | EPI_ISL_520379 |
| VIC364  | EPI_ISL_426672 |
| VIC3641 | EPI_ISL_520381 |
| VIC3643 | EPI_ISL_520383 |
| VIC3645 | EPI_ISL_520385 |
| VIC3647 | EPI_ISL_520386 |
| VIC3648 | EPI_ISL_520387 |
| VIC3649 | EPI_ISL_520388 |

|         |                |
|---------|----------------|
| VIC365  | EPI_ISL_426673 |
| VIC3650 | EPI_ISL_520389 |
| VIC3651 | EPI_ISL_520390 |
| VIC3658 | EPI_ISL_520396 |
| VIC3659 | EPI_ISL_520397 |
| VIC366  | EPI_ISL_426674 |
| VIC3660 | EPI_ISL_520398 |
| VIC3661 | EPI_ISL_520399 |
| VIC3663 | EPI_ISL_520401 |
| VIC3664 | EPI_ISL_520402 |
| VIC3666 | EPI_ISL_520404 |
| VIC3667 | EPI_ISL_520405 |
| VIC3669 | EPI_ISL_520407 |
| VIC367  | EPI_ISL_426675 |
| VIC3670 | EPI_ISL_520408 |
| VIC3672 | EPI_ISL_520410 |
| VIC3673 | EPI_ISL_520411 |
| VIC3674 | EPI_ISL_520412 |
| VIC3680 | EPI_ISL_520418 |
| VIC3684 | EPI_ISL_520421 |
| VIC3685 | EPI_ISL_520422 |
| VIC3688 | EPI_ISL_520425 |
| VIC3689 | EPI_ISL_520426 |
| VIC3690 | EPI_ISL_520427 |
| VIC3693 | EPI_ISL_520430 |
| VIC3694 | EPI_ISL_520431 |
| VIC3696 | EPI_ISL_520433 |
| VIC37   | EPI_ISL_419754 |
| VIC3701 | EPI_ISL_520437 |
| VIC3703 | EPI_ISL_520439 |
| VIC371  | Rejected       |
| VIC3711 | EPI_ISL_520445 |
| VIC3713 | EPI_ISL_520446 |
| VIC3714 | EPI_ISL_520447 |
| VIC3716 | EPI_ISL_520449 |
| VIC3717 | EPI_ISL_520450 |
| VIC3719 | EPI_ISL_520452 |
| VIC372  | EPI_ISL_426679 |
| VIC3720 | EPI_ISL_520453 |
| VIC3721 | EPI_ISL_520454 |
| VIC3722 | EPI_ISL_520455 |
| VIC3723 | EPI_ISL_520456 |
| VIC3725 | EPI_ISL_520458 |
| VIC3727 | Rejected       |
| VIC3728 | EPI_ISL_520460 |
| VIC373  | EPI_ISL_426680 |
| VIC3736 | EPI_ISL_520465 |
| VIC3741 | EPI_ISL_520469 |
| VIC3745 | EPI_ISL_520473 |
| VIC3746 | EPI_ISL_520474 |
| VIC3747 | EPI_ISL_520475 |
| VIC376  | EPI_ISL_426683 |

|         |                |
|---------|----------------|
| VIC377  | EPI_ISL_426684 |
| VIC3781 | EPI_ISL_520501 |
| VIC3783 | EPI_ISL_520503 |
| VIC3785 | EPI_ISL_520504 |
| VIC3787 | EPI_ISL_520505 |
| VIC3788 | Rejected       |
| VIC3790 | EPI_ISL_520507 |
| VIC3791 | EPI_ISL_520508 |
| VIC3792 | EPI_ISL_520509 |
| VIC3793 | EPI_ISL_520510 |
| VIC3794 | EPI_ISL_520511 |
| VIC3795 | EPI_ISL_520512 |
| VIC3796 | EPI_ISL_520513 |
| VIC3798 | EPI_ISL_520515 |
| VIC38   | EPI_ISL_419756 |
| VIC380  | EPI_ISL_426687 |
| VIC3800 | EPI_ISL_520517 |
| VIC3801 | EPI_ISL_520518 |
| VIC3802 | EPI_ISL_520519 |
| VIC3803 | EPI_ISL_520520 |
| VIC3804 | EPI_ISL_520521 |
| VIC3805 | EPI_ISL_520522 |
| VIC3806 | EPI_ISL_520523 |
| VIC3807 | EPI_ISL_520524 |
| VIC3808 | EPI_ISL_520525 |
| VIC3809 | EPI_ISL_520526 |
| VIC381  | EPI_ISL_426688 |
| VIC3811 | EPI_ISL_520527 |
| VIC3812 | EPI_ISL_520528 |
| VIC3813 | EPI_ISL_520529 |
| VIC3814 | EPI_ISL_520530 |
| VIC3816 | EPI_ISL_520532 |
| VIC3820 | EPI_ISL_520533 |
| VIC3821 | EPI_ISL_520534 |
| VIC3822 | EPI_ISL_520535 |
| VIC3823 | EPI_ISL_520536 |
| VIC3824 | EPI_ISL_520537 |
| VIC3825 | EPI_ISL_520538 |
| VIC3826 | EPI_ISL_520539 |
| VIC3827 | EPI_ISL_520540 |
| VIC3828 | EPI_ISL_520541 |
| VIC3829 | EPI_ISL_520542 |
| VIC383  | EPI_ISL_426690 |
| VIC3830 | EPI_ISL_520543 |
| VIC3831 | EPI_ISL_520544 |
| VIC3832 | EPI_ISL_520545 |
| VIC3833 | EPI_ISL_520546 |
| VIC3835 | EPI_ISL_520548 |
| VIC3838 | EPI_ISL_520551 |
| VIC3839 | EPI_ISL_520552 |
| VIC384  | EPI_ISL_426691 |
| VIC3840 | EPI_ISL_520553 |

|         |                |
|---------|----------------|
| VIC3841 | EPI_ISL_520554 |
| VIC3842 | EPI_ISL_520555 |
| VIC3843 | EPI_ISL_520556 |
| VIC3844 | EPI_ISL_520557 |
| VIC3845 | EPI_ISL_520558 |
| VIC3847 | EPI_ISL_520560 |
| VIC3848 | EPI_ISL_520561 |
| VIC3849 | EPI_ISL_520562 |
| VIC3850 | EPI_ISL_520563 |
| VIC3851 | EPI_ISL_520564 |
| VIC3853 | EPI_ISL_520566 |
| VIC3854 | EPI_ISL_520567 |
| VIC3855 | EPI_ISL_520568 |
| VIC3856 | EPI_ISL_520569 |
| VIC3857 | EPI_ISL_520570 |
| VIC3858 | EPI_ISL_520571 |
| VIC3859 | EPI_ISL_520572 |
| VIC3861 | EPI_ISL_520574 |
| VIC3862 | EPI_ISL_520575 |
| VIC3863 | EPI_ISL_520576 |
| VIC3864 | EPI_ISL_520577 |
| VIC3865 | EPI_ISL_520578 |
| VIC3866 | EPI_ISL_520579 |
| VIC3867 | EPI_ISL_520580 |
| VIC3868 | EPI_ISL_520581 |
| VIC3869 | EPI_ISL_520582 |
| VIC387  | EPI_ISL_426694 |
| VIC3870 | EPI_ISL_520583 |
| VIC3871 | EPI_ISL_520584 |
| VIC3872 | EPI_ISL_520585 |
| VIC3873 | EPI_ISL_520586 |
| VIC3874 | EPI_ISL_520587 |
| VIC3875 | EPI_ISL_520588 |
| VIC3876 | EPI_ISL_520589 |
| VIC3877 | EPI_ISL_520590 |
| VIC3878 | EPI_ISL_520591 |
| VIC3879 | EPI_ISL_520592 |
| VIC3880 | EPI_ISL_520593 |
| VIC3881 | EPI_ISL_520594 |
| VIC3882 | EPI_ISL_520595 |
| VIC3883 | EPI_ISL_520596 |
| VIC3884 | EPI_ISL_520597 |
| VIC3885 | EPI_ISL_520598 |
| VIC3886 | EPI_ISL_520599 |
| VIC3887 | EPI_ISL_520600 |
| VIC3888 | Rejected       |
| VIC3889 | EPI_ISL_520601 |
| VIC3890 | EPI_ISL_520602 |
| VIC3891 | EPI_ISL_520603 |
| VIC3892 | EPI_ISL_520604 |
| VIC3893 | EPI_ISL_520605 |
| VIC3894 | EPI_ISL_520606 |



|         |                |
|---------|----------------|
| VIC3895 | EPI_ISL_520607 |
| VIC3896 | EPI_ISL_520608 |
| VIC3897 | EPI_ISL_520609 |
| VIC3898 | EPI_ISL_520610 |
| VIC3899 | EPI_ISL_520611 |
| VIC39   | EPI_ISL_419757 |
| VIC3900 | EPI_ISL_520612 |
| VIC3901 | EPI_ISL_520613 |
| VIC3902 | EPI_ISL_520614 |
| VIC3903 | EPI_ISL_520615 |
| VIC3904 | EPI_ISL_520616 |
| VIC3905 | EPI_ISL_520617 |
| VIC3908 | EPI_ISL_520620 |
| VIC3909 | EPI_ISL_520621 |
| VIC391  | Rejected       |
| VIC3910 | EPI_ISL_520622 |
| VIC3911 | EPI_ISL_520623 |
| VIC3912 | EPI_ISL_520624 |
| VIC3913 | EPI_ISL_520625 |
| VIC3914 | EPI_ISL_520626 |
| VIC3915 | EPI_ISL_520627 |
| VIC3916 | EPI_ISL_520628 |
| VIC3917 | EPI_ISL_520629 |
| VIC3918 | EPI_ISL_520630 |
| VIC3921 | EPI_ISL_520633 |
| VIC3922 | EPI_ISL_520634 |
| VIC3923 | EPI_ISL_520635 |
| VIC3924 | EPI_ISL_520636 |
| VIC3925 | EPI_ISL_520637 |
| VIC3926 | EPI_ISL_520638 |
| VIC3928 | EPI_ISL_520640 |
| VIC3929 | EPI_ISL_520641 |
| VIC3930 | EPI_ISL_520642 |
| VIC3931 | EPI_ISL_520643 |
| VIC3932 | EPI_ISL_520644 |
| VIC3933 | EPI_ISL_520645 |
| VIC3934 | EPI_ISL_520646 |
| VIC3935 | EPI_ISL_520647 |
| VIC3936 | EPI_ISL_520648 |
| VIC3938 | EPI_ISL_520649 |
| VIC3939 | EPI_ISL_520650 |
| VIC3940 | EPI_ISL_520651 |
| VIC3941 | EPI_ISL_520652 |
| VIC3942 | EPI_ISL_520653 |
| VIC3943 | EPI_ISL_520654 |
| VIC3944 | EPI_ISL_520655 |
| VIC3945 | EPI_ISL_520656 |
| VIC3946 | EPI_ISL_520657 |
| VIC3947 | EPI_ISL_520658 |
| VIC3948 | EPI_ISL_520659 |
| VIC3949 | EPI_ISL_520660 |
| VIC3950 | EPI_ISL_520661 |

|         |                |
|---------|----------------|
| VIC3951 | EPI_ISL_520662 |
| VIC3953 | EPI_ISL_519348 |
| VIC3955 | EPI_ISL_519349 |
| VIC3956 | EPI_ISL_519350 |
| VIC3958 | EPI_ISL_519352 |
| VIC3959 | EPI_ISL_519353 |
| VIC3961 | EPI_ISL_519354 |
| VIC3962 | EPI_ISL_519355 |
| VIC3965 | EPI_ISL_519357 |
| VIC3966 | EPI_ISL_519358 |
| VIC3967 | EPI_ISL_519359 |
| VIC3968 | EPI_ISL_519360 |
| VIC3969 | EPI_ISL_519361 |
| VIC3970 | EPI_ISL_519362 |
| VIC3971 | EPI_ISL_519363 |
| VIC3972 | EPI_ISL_519364 |
| VIC3973 | EPI_ISL_519365 |
| VIC3974 | EPI_ISL_519366 |
| VIC3975 | EPI_ISL_519367 |
| VIC3976 | EPI_ISL_519368 |
| VIC3977 | EPI_ISL_519369 |
| VIC3979 | EPI_ISL_519371 |
| VIC398  | EPI_ISL_426701 |
| VIC3980 | EPI_ISL_519372 |
| VIC3982 | EPI_ISL_519374 |
| VIC3985 | EPI_ISL_519375 |
| VIC3986 | EPI_ISL_519376 |
| VIC3987 | EPI_ISL_519377 |
| VIC3988 | EPI_ISL_519378 |
| VIC3989 | EPI_ISL_519379 |
| VIC3990 | EPI_ISL_519380 |
| VIC3991 | EPI_ISL_519381 |
| VIC3992 | EPI_ISL_519382 |
| VIC3993 | EPI_ISL_519383 |
| VIC3994 | Rejected       |
| VIC3995 | EPI_ISL_519384 |
| VIC3996 | EPI_ISL_519385 |
| VIC3997 | EPI_ISL_519386 |
| VIC3998 | EPI_ISL_519387 |
| VIC40   | EPI_ISL_419758 |
| VIC4000 | EPI_ISL_519389 |
| VIC4001 | EPI_ISL_519390 |
| VIC4006 | EPI_ISL_519392 |
| VIC4007 | EPI_ISL_519393 |
| VIC4008 | EPI_ISL_519394 |
| VIC4009 | EPI_ISL_519395 |
| VIC4010 | EPI_ISL_519396 |
| VIC4011 | EPI_ISL_519397 |
| VIC4012 | EPI_ISL_519398 |
| VIC4013 | EPI_ISL_519399 |
| VIC4014 | EPI_ISL_519400 |
| VIC4015 | EPI_ISL_519401 |

|         |                |
|---------|----------------|
| VIC4016 | EPI_ISL_519402 |
| VIC4017 | EPI_ISL_519403 |
| VIC4019 | EPI_ISL_519405 |
| VIC4020 | EPI_ISL_519406 |
| VIC4022 | EPI_ISL_519408 |
| VIC4023 | EPI_ISL_519409 |
| VIC4024 | EPI_ISL_519410 |
| VIC4031 | EPI_ISL_519416 |
| VIC4033 | EPI_ISL_519418 |
| VIC4039 | EPI_ISL_519422 |
| VIC404  | EPI_ISL_426707 |
| VIC4040 | EPI_ISL_519423 |
| VIC4041 | EPI_ISL_519424 |
| VIC4043 | EPI_ISL_519426 |
| VIC4046 | EPI_ISL_519428 |
| VIC4051 | EPI_ISL_519433 |
| VIC4054 | EPI_ISL_519436 |
| VIC4056 | EPI_ISL_519438 |
| VIC4057 | EPI_ISL_519439 |
| VIC4058 | EPI_ISL_519440 |
| VIC4060 | EPI_ISL_519442 |
| VIC4061 | EPI_ISL_519443 |
| VIC4064 | EPI_ISL_519446 |
| VIC4065 | EPI_ISL_519447 |
| VIC4067 | EPI_ISL_519449 |
| VIC4070 | EPI_ISL_519452 |
| VIC4071 | EPI_ISL_519453 |
| VIC4073 | EPI_ISL_519455 |
| VIC4076 | EPI_ISL_519458 |
| VIC4077 | EPI_ISL_519459 |
| VIC408  | EPI_ISL_426710 |
| VIC4084 | EPI_ISL_519465 |
| VIC4087 | EPI_ISL_519468 |
| VIC4088 | EPI_ISL_519469 |
| VIC4089 | EPI_ISL_519470 |
| VIC409  | EPI_ISL_426711 |
| VIC4090 | EPI_ISL_519471 |
| VIC4091 | EPI_ISL_519472 |
| VIC4092 | EPI_ISL_519473 |
| VIC4093 | EPI_ISL_519474 |
| VIC4095 | EPI_ISL_519476 |
| VIC4097 | EPI_ISL_519478 |
| VIC41   | EPI_ISL_419760 |
| VIC4100 | EPI_ISL_519481 |
| VIC4101 | EPI_ISL_519482 |
| VIC4104 | EPI_ISL_519484 |
| VIC4105 | EPI_ISL_519485 |
| VIC4130 | Rejected       |
| VIC4131 | EPI_ISL_519503 |
| VIC4132 | EPI_ISL_519504 |
| VIC4133 | EPI_ISL_519505 |
| VIC4134 | EPI_ISL_519506 |

|         |                |
|---------|----------------|
| VIC4135 | EPI_ISL_519507 |
| VIC4136 | EPI_ISL_519508 |
| VIC414  | EPI_ISL_426714 |
| VIC415  | EPI_ISL_426715 |
| VIC417  | EPI_ISL_426717 |
| VIC4194 | EPI_ISL_519522 |
| VIC4195 | EPI_ISL_519523 |
| VIC4196 | EPI_ISL_519524 |
| VIC4197 | EPI_ISL_519525 |
| VIC4198 | EPI_ISL_519526 |
| VIC4199 | EPI_ISL_519527 |
| VIC42   | EPI_ISL_419761 |
| VIC4200 | EPI_ISL_519528 |
| VIC4201 | EPI_ISL_519529 |
| VIC4202 | EPI_ISL_519530 |
| VIC4203 | EPI_ISL_519531 |
| VIC4204 | EPI_ISL_519532 |
| VIC4205 | EPI_ISL_519533 |
| VIC4206 | EPI_ISL_519534 |
| VIC4207 | EPI_ISL_519535 |
| VIC4208 | EPI_ISL_519536 |
| VIC4209 | EPI_ISL_519537 |
| VIC421  | EPI_ISL_426721 |
| VIC4210 | EPI_ISL_519538 |
| VIC4211 | EPI_ISL_519539 |
| VIC4212 | EPI_ISL_519540 |
| VIC4213 | EPI_ISL_519541 |
| VIC4214 | EPI_ISL_519542 |
| VIC4215 | EPI_ISL_519543 |
| VIC4216 | EPI_ISL_519544 |
| VIC4217 | EPI_ISL_519545 |
| VIC4218 | EPI_ISL_519546 |
| VIC4219 | EPI_ISL_519547 |
| VIC4220 | EPI_ISL_519548 |
| VIC4221 | EPI_ISL_519549 |
| VIC4222 | EPI_ISL_519550 |
| VIC4223 | EPI_ISL_519551 |
| VIC4224 | EPI_ISL_519552 |
| VIC4225 | EPI_ISL_519553 |
| VIC4226 | EPI_ISL_519554 |
| VIC4227 | EPI_ISL_519555 |
| VIC4228 | EPI_ISL_519556 |
| VIC4229 | EPI_ISL_519557 |
| VIC4230 | EPI_ISL_519558 |
| VIC4231 | EPI_ISL_519559 |
| VIC4232 | EPI_ISL_519560 |
| VIC4233 | EPI_ISL_519561 |
| VIC4234 | EPI_ISL_519562 |
| VIC4235 | EPI_ISL_519563 |
| VIC4236 | EPI_ISL_519564 |
| VIC4237 | EPI_ISL_519565 |
| VIC4238 | EPI_ISL_519566 |

|         |                |
|---------|----------------|
| VIC4239 | EPI_ISL_519567 |
| VIC424  | EPI_ISL_426724 |
| VIC4240 | EPI_ISL_519568 |
| VIC4241 | EPI_ISL_519569 |
| VIC4242 | EPI_ISL_519570 |
| VIC4243 | EPI_ISL_519571 |
| VIC4244 | EPI_ISL_519572 |
| VIC4245 | EPI_ISL_519573 |
| VIC4246 | EPI_ISL_519574 |
| VIC4247 | EPI_ISL_519575 |
| VIC4248 | EPI_ISL_519576 |
| VIC4249 | EPI_ISL_519577 |
| VIC425  | EPI_ISL_426725 |
| VIC4250 | EPI_ISL_519578 |
| VIC4251 | EPI_ISL_519579 |
| VIC4252 | EPI_ISL_519580 |
| VIC4253 | EPI_ISL_519581 |
| VIC4254 | EPI_ISL_519582 |
| VIC4255 | EPI_ISL_519583 |
| VIC4256 | EPI_ISL_519584 |
| VIC4257 | EPI_ISL_519585 |
| VIC4258 | EPI_ISL_519586 |
| VIC4259 | EPI_ISL_519587 |
| VIC426  | EPI_ISL_426726 |
| VIC4260 | EPI_ISL_519588 |
| VIC4261 | EPI_ISL_519589 |
| VIC4262 | EPI_ISL_519590 |
| VIC4263 | EPI_ISL_519591 |
| VIC4264 | EPI_ISL_519592 |
| VIC4265 | EPI_ISL_519593 |
| VIC4266 | EPI_ISL_519594 |
| VIC4267 | EPI_ISL_519595 |
| VIC4268 | EPI_ISL_519596 |
| VIC427  | EPI_ISL_426727 |
| VIC4270 | EPI_ISL_519598 |
| VIC4271 | EPI_ISL_519599 |
| VIC4272 | EPI_ISL_519600 |
| VIC4273 | EPI_ISL_519601 |
| VIC4274 | EPI_ISL_519602 |
| VIC4275 | EPI_ISL_519603 |
| VIC4276 | EPI_ISL_519604 |
| VIC4277 | EPI_ISL_519605 |
| VIC4278 | EPI_ISL_519606 |
| VIC4279 | EPI_ISL_519607 |
| VIC4281 | EPI_ISL_519609 |
| VIC4283 | EPI_ISL_519611 |
| VIC4284 | EPI_ISL_519612 |
| VIC4285 | EPI_ISL_519613 |
| VIC4286 | EPI_ISL_519614 |
| VIC4287 | EPI_ISL_519615 |
| VIC4288 | EPI_ISL_519616 |
| VIC429  | EPI_ISL_426729 |

|         |                |
|---------|----------------|
| VIC43   | EPI_ISL_419763 |
| VIC430  | EPI_ISL_426730 |
| VIC4320 | EPI_ISL_519617 |
| VIC4321 | EPI_ISL_519618 |
| VIC4322 | EPI_ISL_519619 |
| VIC4324 | EPI_ISL_519621 |
| VIC4325 | EPI_ISL_519622 |
| VIC4326 | EPI_ISL_519623 |
| VIC4327 | EPI_ISL_519624 |
| VIC4328 | EPI_ISL_519625 |
| VIC4329 | EPI_ISL_519626 |
| VIC4330 | EPI_ISL_519627 |
| VIC4331 | EPI_ISL_519628 |
| VIC4332 | Rejected       |
| VIC4333 | EPI_ISL_519629 |
| VIC4335 | EPI_ISL_519631 |
| VIC4336 | EPI_ISL_519632 |
| VIC4337 | EPI_ISL_519633 |
| VIC4339 | EPI_ISL_519635 |
| VIC4341 | EPI_ISL_519637 |
| VIC4342 | EPI_ISL_519638 |
| VIC4343 | EPI_ISL_519639 |
| VIC4345 | EPI_ISL_519641 |
| VIC4346 | EPI_ISL_519642 |
| VIC4347 | EPI_ISL_519643 |
| VIC4350 | EPI_ISL_519646 |
| VIC4352 | EPI_ISL_519648 |
| VIC4353 | EPI_ISL_519649 |
| VIC4354 | EPI_ISL_519650 |
| VIC4356 | EPI_ISL_519652 |
| VIC4357 | EPI_ISL_519653 |
| VIC4358 | EPI_ISL_519654 |
| VIC4359 | EPI_ISL_519655 |
| VIC4360 | EPI_ISL_519656 |
| VIC4361 | EPI_ISL_519657 |
| VIC4362 | EPI_ISL_519658 |
| VIC4364 | EPI_ISL_519660 |
| VIC4366 | EPI_ISL_519662 |
| VIC4367 | EPI_ISL_519663 |
| VIC4368 | EPI_ISL_519664 |
| VIC4369 | EPI_ISL_519665 |
| VIC437  | EPI_ISL_426734 |
| VIC4370 | EPI_ISL_519666 |
| VIC4371 | EPI_ISL_519667 |
| VIC4372 | EPI_ISL_519668 |
| VIC4373 | EPI_ISL_519669 |
| VIC4374 | EPI_ISL_519670 |
| VIC4375 | EPI_ISL_519671 |
| VIC4376 | EPI_ISL_519672 |
| VIC4377 | EPI_ISL_519673 |
| VIC4378 | EPI_ISL_519674 |
| VIC4379 | EPI_ISL_519675 |

|         |                |
|---------|----------------|
| VIC438  | EPI_ISL_426735 |
| VIC4380 | EPI_ISL_519676 |
| VIC4381 | EPI_ISL_519677 |
| VIC4382 | EPI_ISL_519678 |
| VIC4383 | EPI_ISL_519679 |
| VIC4384 | EPI_ISL_519680 |
| VIC4385 | EPI_ISL_519681 |
| VIC4386 | EPI_ISL_519682 |
| VIC4387 | EPI_ISL_519683 |
| VIC4388 | EPI_ISL_519684 |
| VIC4390 | EPI_ISL_519686 |
| VIC4391 | EPI_ISL_519687 |
| VIC4392 | EPI_ISL_519688 |
| VIC4393 | EPI_ISL_519689 |
| VIC4394 | EPI_ISL_519690 |
| VIC4395 | EPI_ISL_519691 |
| VIC4396 | EPI_ISL_519692 |
| VIC4398 | EPI_ISL_519694 |
| VIC4399 | EPI_ISL_519695 |
| VIC44   | EPI_ISL_419767 |
| VIC440  | EPI_ISL_426737 |
| VIC4400 | EPI_ISL_519696 |
| VIC4401 | EPI_ISL_519697 |
| VIC4402 | EPI_ISL_519698 |
| VIC4403 | EPI_ISL_519699 |
| VIC4404 | EPI_ISL_519700 |
| VIC4405 | EPI_ISL_519701 |
| VIC4407 | EPI_ISL_519703 |
| VIC4408 | EPI_ISL_519704 |
| VIC4409 | EPI_ISL_519705 |
| VIC4410 | EPI_ISL_519706 |
| VIC4411 | EPI_ISL_519707 |
| VIC4412 | EPI_ISL_519708 |
| VIC4413 | EPI_ISL_519709 |
| VIC4414 | EPI_ISL_519710 |
| VIC4415 | EPI_ISL_519711 |
| VIC4416 | EPI_ISL_519712 |
| VIC4417 | EPI_ISL_519713 |
| VIC4418 | EPI_ISL_519714 |
| VIC4419 | EPI_ISL_519715 |
| VIC442  | EPI_ISL_426739 |
| VIC4420 | EPI_ISL_519716 |
| VIC4421 | EPI_ISL_519717 |
| VIC4422 | EPI_ISL_519718 |
| VIC4423 | EPI_ISL_519719 |
| VIC4424 | EPI_ISL_519720 |
| VIC4425 | EPI_ISL_519721 |
| VIC4426 | EPI_ISL_519722 |
| VIC4427 | EPI_ISL_519723 |
| VIC4428 | EPI_ISL_519724 |
| VIC443  | EPI_ISL_426740 |
| VIC4430 | EPI_ISL_519726 |

VIC4431 EPI\_ISL\_519727  
VIC4432 EPI\_ISL\_519728  
VIC4433 EPI\_ISL\_519729  
VIC4434 EPI\_ISL\_519730  
VIC4435 EPI\_ISL\_519731  
VIC4436 EPI\_ISL\_519732  
VIC4437 EPI\_ISL\_519733  
VIC4438 EPI\_ISL\_519734  
VIC4439 EPI\_ISL\_519735  
VIC4440 EPI\_ISL\_519736  
VIC4441 EPI\_ISL\_519737  
VIC4442 EPI\_ISL\_519738  
VIC4443 EPI\_ISL\_519739  
VIC4444 EPI\_ISL\_519740  
VIC4445 EPI\_ISL\_519741  
VIC4446 EPI\_ISL\_519742  
VIC4447 EPI\_ISL\_519743  
VIC4448 EPI\_ISL\_519744  
VIC4449 EPI\_ISL\_519745  
VIC4450 EPI\_ISL\_519746  
VIC4451 EPI\_ISL\_519747  
VIC4452 EPI\_ISL\_519748  
VIC4453 EPI\_ISL\_519749  
VIC4454 EPI\_ISL\_519750  
VIC4455 EPI\_ISL\_519751  
VIC4456 EPI\_ISL\_519752  
VIC4457 EPI\_ISL\_519753  
VIC4458 EPI\_ISL\_519754  
VIC4459 EPI\_ISL\_519755  
VIC4460 EPI\_ISL\_519756  
VIC4461 EPI\_ISL\_519757  
VIC4462 EPI\_ISL\_519758  
VIC4463 EPI\_ISL\_519759  
VIC4464 EPI\_ISL\_519760  
VIC4465 EPI\_ISL\_519761  
VIC4466 EPI\_ISL\_519762  
VIC4467 EPI\_ISL\_519763  
VIC4468 EPI\_ISL\_519764  
VIC4469 EPI\_ISL\_519765  
VIC4470 EPI\_ISL\_519766  
VIC4471 EPI\_ISL\_519767  
VIC4472 EPI\_ISL\_519768  
VIC4473 EPI\_ISL\_519769  
VIC4474 EPI\_ISL\_519770  
VIC4475 EPI\_ISL\_519771  
VIC4476 EPI\_ISL\_519772  
VIC4477 EPI\_ISL\_519773  
VIC4478 EPI\_ISL\_519774  
VIC4479 EPI\_ISL\_519775  
VIC448 EPI\_ISL\_426744  
VIC4480 EPI\_ISL\_519776  
VIC4481 EPI\_ISL\_519777



|         |                |
|---------|----------------|
| VIC4482 | EPI_ISL_519778 |
| VIC4483 | EPI_ISL_519779 |
| VIC4484 | EPI_ISL_519780 |
| VIC4485 | EPI_ISL_519781 |
| VIC4486 | EPI_ISL_519782 |
| VIC4487 | EPI_ISL_519783 |
| VIC4488 | EPI_ISL_519784 |
| VIC4489 | EPI_ISL_519785 |
| VIC449  | EPI_ISL_426745 |
| VIC4490 | EPI_ISL_518901 |
| VIC4491 | EPI_ISL_518902 |
| VIC4492 | EPI_ISL_518903 |
| VIC4495 | EPI_ISL_518906 |
| VIC4496 | EPI_ISL_518907 |
| VIC4497 | EPI_ISL_518908 |
| VIC4498 | EPI_ISL_518909 |
| VIC4499 | EPI_ISL_518910 |
| VIC45   | EPI_ISL_419802 |
| VIC450  | EPI_ISL_426746 |
| VIC4500 | EPI_ISL_518911 |
| VIC4501 | EPI_ISL_518912 |
| VIC4502 | EPI_ISL_518913 |
| VIC4503 | EPI_ISL_518914 |
| VIC4505 | Rejected       |
| VIC4506 | EPI_ISL_518917 |
| VIC4507 | EPI_ISL_518918 |
| VIC4508 | EPI_ISL_518919 |
| VIC4509 | EPI_ISL_518920 |
| VIC451  | EPI_ISL_426747 |
| VIC4510 | EPI_ISL_518921 |
| VIC4511 | EPI_ISL_518922 |
| VIC4512 | EPI_ISL_518923 |
| VIC4513 | EPI_ISL_518924 |
| VIC4514 | EPI_ISL_518925 |
| VIC4515 | EPI_ISL_518926 |
| VIC4516 | EPI_ISL_518927 |
| VIC4517 | EPI_ISL_518928 |
| VIC4518 | EPI_ISL_518929 |
| VIC4519 | EPI_ISL_518930 |
| VIC4520 | EPI_ISL_518931 |
| VIC4521 | EPI_ISL_518932 |
| VIC4522 | EPI_ISL_518933 |
| VIC4523 | EPI_ISL_518934 |
| VIC4524 | EPI_ISL_518935 |
| VIC4525 | EPI_ISL_518936 |
| VIC4526 | EPI_ISL_518937 |
| VIC4527 | EPI_ISL_518938 |
| VIC4528 | EPI_ISL_518939 |
| VIC4529 | EPI_ISL_518940 |
| VIC4530 | EPI_ISL_518941 |
| VIC4532 | EPI_ISL_518943 |
| VIC4533 | EPI_ISL_518944 |

|         |                |
|---------|----------------|
| VIC4534 | EPI_ISL_518945 |
| VIC4535 | EPI_ISL_518946 |
| VIC4536 | EPI_ISL_518947 |
| VIC4537 | EPI_ISL_518948 |
| VIC4538 | EPI_ISL_518949 |
| VIC4539 | EPI_ISL_518950 |
| VIC454  | EPI_ISL_426750 |
| VIC4540 | EPI_ISL_518951 |
| VIC4541 | EPI_ISL_518952 |
| VIC4542 | EPI_ISL_518953 |
| VIC4544 | EPI_ISL_518955 |
| VIC4545 | EPI_ISL_518956 |
| VIC4546 | EPI_ISL_518957 |
| VIC4547 | EPI_ISL_518958 |
| VIC4548 | EPI_ISL_518959 |
| VIC4549 | EPI_ISL_518960 |
| VIC455  | Rejected       |
| VIC4550 | EPI_ISL_518961 |
| VIC4552 | EPI_ISL_518962 |
| VIC4553 | EPI_ISL_518963 |
| VIC4554 | EPI_ISL_518964 |
| VIC4555 | EPI_ISL_518965 |
| VIC4557 | EPI_ISL_518967 |
| VIC4558 | EPI_ISL_518968 |
| VIC4559 | EPI_ISL_518969 |
| VIC456  | EPI_ISL_426751 |
| VIC4560 | EPI_ISL_518970 |
| VIC4561 | EPI_ISL_518971 |
| VIC4562 | EPI_ISL_518972 |
| VIC4563 | EPI_ISL_518973 |
| VIC4564 | Rejected       |
| VIC4565 | EPI_ISL_518975 |
| VIC4571 | EPI_ISL_518977 |
| VIC4572 | EPI_ISL_518978 |
| VIC4574 | EPI_ISL_518979 |
| VIC4576 | EPI_ISL_518980 |
| VIC4579 | EPI_ISL_518981 |
| VIC4580 | EPI_ISL_518982 |
| VIC4581 | EPI_ISL_518983 |
| VIC4583 | EPI_ISL_518984 |
| VIC4584 | EPI_ISL_518985 |
| VIC4585 | EPI_ISL_518986 |
| VIC4586 | EPI_ISL_518987 |
| VIC4587 | EPI_ISL_518988 |
| VIC4588 | EPI_ISL_518989 |
| VIC4589 | EPI_ISL_518990 |
| VIC4590 | EPI_ISL_518991 |
| VIC4591 | EPI_ISL_518992 |
| VIC4593 | EPI_ISL_518994 |
| VIC4594 | EPI_ISL_518995 |
| VIC4595 | EPI_ISL_518996 |
| VIC4596 | EPI_ISL_518997 |

|         |                |
|---------|----------------|
| VIC4597 | EPI_ISL_518998 |
| VIC4598 | EPI_ISL_518999 |
| VIC4599 | EPI_ISL_519000 |
| VIC46   | EPI_ISL_419816 |
| VIC460  | EPI_ISL_426753 |
| VIC4600 | EPI_ISL_519001 |
| VIC4601 | EPI_ISL_519002 |
| VIC4602 | EPI_ISL_519003 |
| VIC4603 | EPI_ISL_519004 |
| VIC4604 | EPI_ISL_519005 |
| VIC4605 | EPI_ISL_519006 |
| VIC4607 | EPI_ISL_519008 |
| VIC4608 | EPI_ISL_519009 |
| VIC4609 | EPI_ISL_519010 |
| VIC4610 | EPI_ISL_519011 |
| VIC4615 | EPI_ISL_519013 |
| VIC4616 | Rejected       |
| VIC4617 | EPI_ISL_519014 |
| VIC4619 | EPI_ISL_519015 |
| VIC4620 | EPI_ISL_519016 |
| VIC4621 | EPI_ISL_519017 |
| VIC4622 | EPI_ISL_519018 |
| VIC4625 | EPI_ISL_519019 |
| VIC4627 | EPI_ISL_519020 |
| VIC4629 | EPI_ISL_519022 |
| VIC463  | EPI_ISL_426756 |
| VIC4632 | EPI_ISL_519023 |
| VIC4634 | EPI_ISL_519025 |
| VIC4635 | EPI_ISL_519026 |
| VIC4636 | EPI_ISL_519027 |
| VIC4637 | EPI_ISL_519028 |
| VIC4638 | EPI_ISL_519029 |
| VIC4639 | EPI_ISL_519030 |
| VIC4640 | EPI_ISL_519031 |
| VIC4641 | EPI_ISL_519032 |
| VIC4642 | EPI_ISL_519033 |
| VIC4643 | EPI_ISL_519034 |
| VIC4644 | EPI_ISL_519035 |
| VIC4645 | EPI_ISL_519036 |
| VIC4646 | EPI_ISL_519037 |
| VIC4647 | EPI_ISL_519038 |
| VIC4648 | EPI_ISL_519039 |
| VIC4649 | EPI_ISL_519040 |
| VIC4650 | EPI_ISL_519041 |
| VIC4651 | EPI_ISL_519042 |
| VIC4654 | EPI_ISL_519043 |
| VIC4655 | EPI_ISL_519044 |
| VIC4656 | EPI_ISL_519045 |
| VIC4657 | EPI_ISL_519046 |
| VIC4658 | EPI_ISL_519047 |
| VIC4659 | EPI_ISL_519048 |
| VIC466  | EPI_ISL_426759 |

|         |                |
|---------|----------------|
| VIC4660 | EPI_ISL_519049 |
| VIC4661 | EPI_ISL_519050 |
| VIC4662 | EPI_ISL_519051 |
| VIC4663 | EPI_ISL_519052 |
| VIC4665 | EPI_ISL_519053 |
| VIC4666 | EPI_ISL_519054 |
| VIC4667 | EPI_ISL_519055 |
| VIC4668 | EPI_ISL_519056 |
| VIC4669 | EPI_ISL_519057 |
| VIC467  | EPI_ISL_426760 |
| VIC4670 | EPI_ISL_519058 |
| VIC4671 | EPI_ISL_519059 |
| VIC4672 | EPI_ISL_519060 |
| VIC4673 | EPI_ISL_519061 |
| VIC4674 | EPI_ISL_519062 |
| VIC4675 | EPI_ISL_519063 |
| VIC4676 | EPI_ISL_519064 |
| VIC4677 | EPI_ISL_519065 |
| VIC4678 | EPI_ISL_519066 |
| VIC4679 | EPI_ISL_519067 |
| VIC4680 | EPI_ISL_519068 |
| VIC4681 | EPI_ISL_519069 |
| VIC4682 | EPI_ISL_519070 |
| VIC4683 | EPI_ISL_519071 |
| VIC4684 | EPI_ISL_519072 |
| VIC4685 | EPI_ISL_519073 |
| VIC4686 | EPI_ISL_519074 |
| VIC4687 | EPI_ISL_519075 |
| VIC4688 | EPI_ISL_519076 |
| VIC4689 | EPI_ISL_519077 |
| VIC4691 | EPI_ISL_519079 |
| VIC4694 | EPI_ISL_519082 |
| VIC4695 | EPI_ISL_519083 |
| VIC4696 | EPI_ISL_519084 |
| VIC4697 | EPI_ISL_519085 |
| VIC4698 | EPI_ISL_519086 |
| VIC4699 | EPI_ISL_519087 |
| VIC47   | EPI_ISL_419759 |
| VIC4700 | EPI_ISL_519088 |
| VIC4701 | EPI_ISL_519089 |
| VIC4702 | EPI_ISL_519090 |
| VIC4704 | EPI_ISL_519092 |
| VIC4705 | EPI_ISL_519093 |
| VIC4706 | EPI_ISL_519094 |
| VIC4707 | EPI_ISL_519095 |
| VIC4708 | EPI_ISL_519096 |
| VIC4709 | EPI_ISL_519097 |
| VIC4710 | EPI_ISL_519098 |
| VIC4711 | EPI_ISL_519099 |
| VIC4712 | EPI_ISL_519100 |
| VIC4713 | EPI_ISL_519101 |
| VIC4714 | EPI_ISL_519102 |

|         |                |
|---------|----------------|
| VIC4715 | EPI_ISL_519103 |
| VIC4716 | EPI_ISL_519104 |
| VIC4717 | EPI_ISL_519105 |
| VIC4718 | EPI_ISL_519106 |
| VIC4719 | EPI_ISL_519107 |
| VIC4720 | EPI_ISL_519108 |
| VIC4721 | EPI_ISL_519109 |
| VIC4722 | EPI_ISL_519110 |
| VIC4723 | EPI_ISL_519111 |
| VIC4724 | EPI_ISL_519112 |
| VIC4725 | EPI_ISL_519113 |
| VIC4726 | EPI_ISL_519114 |
| VIC4727 | EPI_ISL_519115 |
| VIC4728 | EPI_ISL_519116 |
| VIC4729 | EPI_ISL_519117 |
| VIC473  | EPI_ISL_426906 |
| VIC4730 | EPI_ISL_519118 |
| VIC4731 | EPI_ISL_519119 |
| VIC4732 | EPI_ISL_519120 |
| VIC4733 | EPI_ISL_519121 |
| VIC4734 | EPI_ISL_519122 |
| VIC4735 | EPI_ISL_519123 |
| VIC4736 | EPI_ISL_519124 |
| VIC4737 | EPI_ISL_519125 |
| VIC4738 | EPI_ISL_519126 |
| VIC4739 | EPI_ISL_519127 |
| VIC4740 | EPI_ISL_519128 |
| VIC4741 | EPI_ISL_519129 |
| VIC4742 | EPI_ISL_519130 |
| VIC4743 | EPI_ISL_519131 |
| VIC4744 | EPI_ISL_519132 |
| VIC4745 | EPI_ISL_519133 |
| VIC4746 | EPI_ISL_519134 |
| VIC4747 | EPI_ISL_519135 |
| VIC4748 | EPI_ISL_519136 |
| VIC4749 | EPI_ISL_519137 |
| VIC475  | EPI_ISL_426907 |
| VIC4750 | EPI_ISL_519138 |
| VIC4751 | EPI_ISL_519139 |
| VIC4752 | EPI_ISL_519140 |
| VIC4753 | EPI_ISL_519141 |
| VIC4754 | EPI_ISL_519142 |
| VIC4755 | EPI_ISL_519143 |
| VIC4756 | EPI_ISL_519144 |
| VIC4757 | EPI_ISL_519145 |
| VIC4758 | EPI_ISL_519146 |
| VIC4759 | EPI_ISL_519147 |
| VIC476  | EPI_ISL_426908 |
| VIC4760 | EPI_ISL_519148 |
| VIC4761 | EPI_ISL_519149 |
| VIC4762 | EPI_ISL_519150 |
| VIC4763 | EPI_ISL_519151 |

|         |                |
|---------|----------------|
| VIC4764 | EPI_ISL_519152 |
| VIC4765 | EPI_ISL_519153 |
| VIC4766 | EPI_ISL_519154 |
| VIC4767 | EPI_ISL_519155 |
| VIC4768 | EPI_ISL_519156 |
| VIC4769 | EPI_ISL_519157 |
| VIC477  | EPI_ISL_426909 |
| VIC4770 | Rejected       |
| VIC4771 | Rejected       |
| VIC4772 | EPI_ISL_519158 |
| VIC4773 | EPI_ISL_519159 |
| VIC4774 | EPI_ISL_519160 |
| VIC4775 | EPI_ISL_519161 |
| VIC4776 | EPI_ISL_519162 |
| VIC4777 | EPI_ISL_519163 |
| VIC4778 | EPI_ISL_519164 |
| VIC4779 | EPI_ISL_519165 |
| VIC478  | EPI_ISL_426910 |
| VIC4780 | EPI_ISL_519166 |
| VIC4781 | EPI_ISL_519167 |
| VIC4782 | EPI_ISL_519168 |
| VIC4783 | EPI_ISL_519169 |
| VIC4784 | EPI_ISL_519170 |
| VIC4785 | EPI_ISL_519171 |
| VIC4786 | EPI_ISL_519172 |
| VIC4787 | EPI_ISL_519173 |
| VIC4788 | EPI_ISL_519174 |
| VIC4789 | EPI_ISL_519175 |
| VIC4790 | EPI_ISL_519176 |
| VIC4791 | EPI_ISL_519177 |
| VIC4792 | EPI_ISL_519178 |
| VIC4793 | EPI_ISL_519179 |
| VIC4794 | EPI_ISL_519180 |
| VIC4795 | EPI_ISL_519181 |
| VIC4796 | EPI_ISL_519182 |
| VIC4797 | EPI_ISL_519183 |
| VIC4798 | EPI_ISL_519184 |
| VIC4799 | EPI_ISL_519185 |
| VIC48   | EPI_ISL_419762 |
| VIC4801 | Rejected       |
| VIC4802 | EPI_ISL_519187 |
| VIC4803 | EPI_ISL_519188 |
| VIC4804 | EPI_ISL_519189 |
| VIC4805 | EPI_ISL_519190 |
| VIC4806 | EPI_ISL_519191 |
| VIC4807 | EPI_ISL_519192 |
| VIC4808 | EPI_ISL_519193 |
| VIC4809 | EPI_ISL_519194 |
| VIC481  | EPI_ISL_426912 |
| VIC4810 | EPI_ISL_519195 |
| VIC4811 | EPI_ISL_519196 |
| VIC4812 | EPI_ISL_519197 |

|         |                |
|---------|----------------|
| VIC4813 | EPI_ISL_519198 |
| VIC4814 | EPI_ISL_519199 |
| VIC4815 | EPI_ISL_519200 |
| VIC4816 | EPI_ISL_519201 |
| VIC4817 | EPI_ISL_519202 |
| VIC4818 | EPI_ISL_519203 |
| VIC4819 | EPI_ISL_519204 |
| VIC4820 | EPI_ISL_519205 |
| VIC4821 | EPI_ISL_519206 |
| VIC4822 | EPI_ISL_519207 |
| VIC4823 | EPI_ISL_519208 |
| VIC4824 | EPI_ISL_519209 |
| VIC4826 | EPI_ISL_519210 |
| VIC4827 | EPI_ISL_519211 |
| VIC4829 | EPI_ISL_519213 |
| VIC483  | EPI_ISL_426914 |
| VIC4830 | EPI_ISL_519214 |
| VIC4831 | EPI_ISL_519215 |
| VIC4832 | EPI_ISL_519216 |
| VIC4833 | EPI_ISL_519217 |
| VIC4834 | EPI_ISL_519218 |
| VIC4835 | EPI_ISL_519219 |
| VIC4836 | EPI_ISL_519220 |
| VIC4837 | EPI_ISL_519221 |
| VIC4838 | EPI_ISL_519222 |
| VIC4840 | EPI_ISL_519224 |
| VIC4841 | EPI_ISL_519225 |
| VIC4842 | EPI_ISL_519226 |
| VIC4844 | EPI_ISL_519228 |
| VIC4845 | EPI_ISL_519229 |
| VIC4847 | EPI_ISL_519231 |
| VIC4848 | EPI_ISL_519232 |
| VIC4849 | EPI_ISL_519233 |
| VIC4850 | EPI_ISL_519234 |
| VIC4851 | EPI_ISL_519235 |
| VIC4852 | EPI_ISL_519236 |
| VIC4853 | EPI_ISL_519237 |
| VIC4854 | EPI_ISL_519238 |
| VIC4855 | EPI_ISL_519239 |
| VIC4856 | EPI_ISL_519240 |
| VIC4857 | EPI_ISL_519241 |
| VIC4859 | EPI_ISL_519243 |
| VIC486  | EPI_ISL_426917 |
| VIC4860 | EPI_ISL_519244 |
| VIC4861 | EPI_ISL_519245 |
| VIC4862 | EPI_ISL_519246 |
| VIC4863 | EPI_ISL_519247 |
| VIC4865 | EPI_ISL_519249 |
| VIC4866 | EPI_ISL_519250 |
| VIC4867 | EPI_ISL_519251 |
| VIC4868 | EPI_ISL_519252 |
| VIC4869 | EPI_ISL_519253 |

|         |                |
|---------|----------------|
| VIC487  | EPI_ISL_426918 |
| VIC4870 | EPI_ISL_519254 |
| VIC4871 | EPI_ISL_519255 |
| VIC4873 | EPI_ISL_519256 |
| VIC4874 | EPI_ISL_519257 |
| VIC4875 | EPI_ISL_519258 |
| VIC4876 | EPI_ISL_519259 |
| VIC4877 | EPI_ISL_519260 |
| VIC4878 | Rejected       |
| VIC4879 | EPI_ISL_519261 |
| VIC488  | EPI_ISL_426919 |
| VIC4880 | EPI_ISL_519262 |
| VIC4881 | EPI_ISL_519263 |
| VIC4882 | EPI_ISL_519264 |
| VIC4883 | EPI_ISL_519265 |
| VIC4884 | EPI_ISL_519266 |
| VIC4885 | EPI_ISL_519267 |
| VIC4889 | EPI_ISL_519269 |
| VIC489  | EPI_ISL_426920 |
| VIC4890 | EPI_ISL_519270 |
| VIC4894 | EPI_ISL_519272 |
| VIC4896 | EPI_ISL_519274 |
| VIC4897 | EPI_ISL_519275 |
| VIC49   | EPI_ISL_419764 |
| VIC490  | EPI_ISL_426921 |
| VIC4901 | EPI_ISL_519277 |
| VIC4902 | EPI_ISL_519278 |
| VIC4903 | EPI_ISL_519279 |
| VIC4904 | EPI_ISL_519280 |
| VIC4905 | EPI_ISL_519281 |
| VIC4906 | EPI_ISL_519282 |
| VIC4907 | EPI_ISL_519283 |
| VIC4908 | EPI_ISL_519284 |
| VIC4909 | EPI_ISL_519285 |
| VIC491  | EPI_ISL_426922 |
| VIC4910 | EPI_ISL_519286 |
| VIC4911 | EPI_ISL_519287 |
| VIC4912 | EPI_ISL_519288 |
| VIC4913 | EPI_ISL_519289 |
| VIC4914 | EPI_ISL_519290 |
| VIC4915 | EPI_ISL_519291 |
| VIC4917 | EPI_ISL_519292 |
| VIC4918 | EPI_ISL_519293 |
| VIC4919 | EPI_ISL_519294 |
| VIC4920 | EPI_ISL_519295 |
| VIC4921 | EPI_ISL_519296 |
| VIC4922 | EPI_ISL_519297 |
| VIC4924 | EPI_ISL_519298 |
| VIC4925 | EPI_ISL_519299 |
| VIC4926 | EPI_ISL_519300 |
| VIC4927 | EPI_ISL_519301 |
| VIC4931 | EPI_ISL_519305 |



|         |                |
|---------|----------------|
| VIC4932 | EPI_ISL_519306 |
| VIC4933 | EPI_ISL_519307 |
| VIC4934 | EPI_ISL_519308 |
| VIC4935 | EPI_ISL_519309 |
| VIC4936 | EPI_ISL_519310 |
| VIC4937 | EPI_ISL_519311 |
| VIC4938 | EPI_ISL_519312 |
| VIC4939 | EPI_ISL_519313 |
| VIC4940 | EPI_ISL_519314 |
| VIC4941 | EPI_ISL_519315 |
| VIC4943 | EPI_ISL_519317 |
| VIC4945 | EPI_ISL_519318 |
| VIC4946 | EPI_ISL_519319 |
| VIC4947 | EPI_ISL_519320 |
| VIC4948 | EPI_ISL_519321 |
| VIC4949 | EPI_ISL_519322 |
| VIC495  | EPI_ISL_426768 |
| VIC4953 | EPI_ISL_519324 |
| VIC4954 | EPI_ISL_519325 |
| VIC4958 | EPI_ISL_519326 |
| VIC496  | EPI_ISL_426769 |
| VIC4964 | EPI_ISL_519330 |
| VIC4967 | EPI_ISL_519333 |
| VIC4968 | EPI_ISL_519334 |
| VIC4969 | EPI_ISL_519335 |
| VIC4970 | EPI_ISL_519336 |
| VIC4971 | EPI_ISL_519337 |
| VIC4972 | EPI_ISL_519338 |
| VIC4973 | EPI_ISL_519339 |
| VIC4974 | EPI_ISL_519340 |
| VIC4975 | EPI_ISL_519341 |
| VIC4976 | EPI_ISL_519342 |
| VIC4977 | EPI_ISL_519343 |
| VIC4978 | EPI_ISL_519344 |
| VIC4979 | EPI_ISL_519345 |
| VIC4980 | EPI_ISL_519346 |
| VIC4981 | EPI_ISL_519347 |
| VIC4982 | EPI_ISL_519786 |
| VIC4983 | EPI_ISL_519787 |
| VIC4984 | EPI_ISL_519788 |
| VIC4985 | EPI_ISL_519789 |
| VIC4986 | EPI_ISL_519790 |
| VIC4987 | EPI_ISL_519791 |
| VIC4988 | EPI_ISL_519792 |
| VIC4989 | EPI_ISL_519793 |
| VIC4990 | EPI_ISL_519794 |
| VIC4991 | EPI_ISL_519795 |
| VIC4992 | EPI_ISL_519796 |
| VIC4993 | EPI_ISL_519797 |
| VIC4994 | EPI_ISL_519798 |
| VIC4995 | EPI_ISL_519799 |
| VIC4996 | EPI_ISL_519800 |

|         |                |
|---------|----------------|
| VIC4997 | EPI_ISL_519801 |
| VIC4998 | EPI_ISL_519802 |
| VIC4999 | EPI_ISL_519803 |
| VIC50   | EPI_ISL_419766 |
| VIC500  | EPI_ISL_426772 |
| VIC5000 | EPI_ISL_519804 |
| VIC5001 | EPI_ISL_519805 |
| VIC5002 | EPI_ISL_519806 |
| VIC5003 | EPI_ISL_519807 |
| VIC5004 | EPI_ISL_519808 |
| VIC5006 | EPI_ISL_519810 |
| VIC5007 | EPI_ISL_519811 |
| VIC5008 | EPI_ISL_519812 |
| VIC5009 | EPI_ISL_519813 |
| VIC5010 | EPI_ISL_519814 |
| VIC5011 | EPI_ISL_519815 |
| VIC5012 | EPI_ISL_519816 |
| VIC5013 | EPI_ISL_519817 |
| VIC5014 | EPI_ISL_519818 |
| VIC5016 | EPI_ISL_519820 |
| VIC5017 | EPI_ISL_519821 |
| VIC5018 | EPI_ISL_519822 |
| VIC5019 | EPI_ISL_519823 |
| VIC5020 | EPI_ISL_519824 |
| VIC5021 | EPI_ISL_519825 |
| VIC5022 | EPI_ISL_519826 |
| VIC5023 | EPI_ISL_519827 |
| VIC5024 | EPI_ISL_519828 |
| VIC5025 | EPI_ISL_519829 |
| VIC5026 | EPI_ISL_519830 |
| VIC5027 | EPI_ISL_519831 |
| VIC5028 | EPI_ISL_519832 |
| VIC5029 | EPI_ISL_519833 |
| VIC5030 | EPI_ISL_519834 |
| VIC5031 | EPI_ISL_519835 |
| VIC5032 | EPI_ISL_519836 |
| VIC5033 | EPI_ISL_519837 |
| VIC5034 | EPI_ISL_519838 |
| VIC5035 | EPI_ISL_519839 |
| VIC5036 | EPI_ISL_519840 |
| VIC5037 | EPI_ISL_519841 |
| VIC5038 | EPI_ISL_519842 |
| VIC5039 | EPI_ISL_519843 |
| VIC504  | EPI_ISL_426775 |
| VIC5040 | EPI_ISL_519844 |
| VIC5041 | EPI_ISL_519845 |
| VIC5042 | EPI_ISL_519846 |
| VIC5043 | EPI_ISL_519847 |
| VIC5044 | EPI_ISL_519848 |
| VIC5045 | EPI_ISL_519849 |
| VIC5046 | EPI_ISL_519850 |
| VIC5047 | EPI_ISL_519851 |

|         |                |
|---------|----------------|
| VIC5048 | EPI_ISL_519852 |
| VIC5050 | EPI_ISL_519853 |
| VIC5051 | EPI_ISL_519854 |
| VIC5052 | EPI_ISL_519855 |
| VIC5053 | EPI_ISL_519856 |
| VIC5054 | EPI_ISL_519857 |
| VIC5055 | EPI_ISL_519858 |
| VIC5056 | EPI_ISL_519859 |
| VIC5057 | EPI_ISL_519860 |
| VIC5058 | EPI_ISL_519861 |
| VIC5060 | EPI_ISL_519863 |
| VIC5061 | EPI_ISL_519864 |
| VIC5062 | EPI_ISL_519865 |
| VIC5063 | EPI_ISL_519866 |
| VIC5064 | EPI_ISL_519867 |
| VIC5065 | EPI_ISL_519868 |
| VIC5066 | EPI_ISL_519869 |
| VIC5067 | EPI_ISL_519870 |
| VIC5068 | EPI_ISL_519871 |
| VIC5069 | EPI_ISL_519872 |
| VIC5070 | EPI_ISL_519873 |
| VIC5071 | EPI_ISL_519874 |
| VIC5072 | EPI_ISL_519875 |
| VIC5073 | EPI_ISL_519876 |
| VIC5074 | EPI_ISL_519877 |
| VIC5075 | EPI_ISL_519878 |
| VIC5077 | EPI_ISL_519880 |
| VIC5078 | EPI_ISL_519881 |
| VIC5079 | EPI_ISL_519882 |
| VIC5080 | EPI_ISL_519883 |
| VIC5081 | EPI_ISL_519884 |
| VIC5082 | EPI_ISL_519885 |
| VIC5083 | EPI_ISL_519886 |
| VIC5084 | EPI_ISL_519887 |
| VIC5085 | EPI_ISL_519888 |
| VIC5086 | EPI_ISL_519889 |
| VIC5087 | EPI_ISL_519890 |
| VIC5088 | EPI_ISL_519891 |
| VIC5089 | EPI_ISL_519892 |
| VIC5090 | EPI_ISL_519893 |
| VIC5091 | EPI_ISL_519894 |
| VIC5092 | EPI_ISL_519895 |
| VIC5093 | EPI_ISL_519896 |
| VIC5094 | EPI_ISL_519897 |
| VIC5095 | EPI_ISL_519898 |
| VIC5096 | EPI_ISL_519899 |
| VIC5097 | EPI_ISL_519900 |
| VIC5098 | EPI_ISL_519901 |
| VIC5099 | EPI_ISL_519902 |
| VIC51   | EPI_ISL_419826 |
| VIC5100 | EPI_ISL_519903 |
| VIC5101 | EPI_ISL_519904 |

|         |                |
|---------|----------------|
| VIC5102 | EPI_ISL_519905 |
| VIC5103 | EPI_ISL_519906 |
| VIC5104 | EPI_ISL_519907 |
| VIC5105 | EPI_ISL_519908 |
| VIC5106 | EPI_ISL_519909 |
| VIC5107 | EPI_ISL_519910 |
| VIC5108 | EPI_ISL_519911 |
| VIC5109 | EPI_ISL_519912 |
| VIC5110 | EPI_ISL_519913 |
| VIC5111 | EPI_ISL_519914 |
| VIC5112 | EPI_ISL_519915 |
| VIC5113 | EPI_ISL_519916 |
| VIC5114 | EPI_ISL_519917 |
| VIC5115 | EPI_ISL_519918 |
| VIC5116 | EPI_ISL_519919 |
| VIC5117 | EPI_ISL_519920 |
| VIC5118 | EPI_ISL_519921 |
| VIC5119 | EPI_ISL_519922 |
| VIC5120 | EPI_ISL_519923 |
| VIC5121 | EPI_ISL_519924 |
| VIC5122 | EPI_ISL_519925 |
| VIC5123 | EPI_ISL_519926 |
| VIC5124 | EPI_ISL_519927 |
| VIC5125 | EPI_ISL_519928 |
| VIC5126 | EPI_ISL_519929 |
| VIC5127 | EPI_ISL_519930 |
| VIC5128 | EPI_ISL_519931 |
| VIC5129 | EPI_ISL_519932 |
| VIC5130 | EPI_ISL_519933 |
| VIC5131 | EPI_ISL_519934 |
| VIC5132 | EPI_ISL_519935 |
| VIC5133 | EPI_ISL_519936 |
| VIC5134 | EPI_ISL_519937 |
| VIC5135 | EPI_ISL_519938 |
| VIC5136 | EPI_ISL_519939 |
| VIC5137 | EPI_ISL_519940 |
| VIC5138 | EPI_ISL_519941 |
| VIC5139 | EPI_ISL_519942 |
| VIC5140 | EPI_ISL_519943 |
| VIC5141 | EPI_ISL_519944 |
| VIC5142 | EPI_ISL_519945 |
| VIC5143 | EPI_ISL_519946 |
| VIC5145 | EPI_ISL_519947 |
| VIC5150 | EPI_ISL_519948 |
| VIC5174 | EPI_ISL_519949 |
| VIC5180 | EPI_ISL_519950 |
| VIC5186 | EPI_ISL_519951 |
| VIC5187 | EPI_ISL_519952 |
| VIC5188 | EPI_ISL_519953 |
| VIC5189 | EPI_ISL_519954 |
| VIC5190 | EPI_ISL_519955 |
| VIC5191 | EPI_ISL_519956 |

|         |                |
|---------|----------------|
| VIC5192 | EPI_ISL_519957 |
| VIC5193 | EPI_ISL_519958 |
| VIC5194 | EPI_ISL_519959 |
| VIC5195 | EPI_ISL_519960 |
| VIC5196 | EPI_ISL_519961 |
| VIC5197 | EPI_ISL_519962 |
| VIC5199 | EPI_ISL_519964 |
| VIC52   | EPI_ISL_419768 |
| VIC5200 | EPI_ISL_519965 |
| VIC5201 | EPI_ISL_519966 |
| VIC5202 | EPI_ISL_519967 |
| VIC5203 | EPI_ISL_519968 |
| VIC5204 | EPI_ISL_519969 |
| VIC5205 | EPI_ISL_519970 |
| VIC5206 | EPI_ISL_519971 |
| VIC5207 | EPI_ISL_519972 |
| VIC5208 | EPI_ISL_519973 |
| VIC5209 | EPI_ISL_519974 |
| VIC5210 | EPI_ISL_519975 |
| VIC5211 | EPI_ISL_519976 |
| VIC5212 | EPI_ISL_519977 |
| VIC5213 | EPI_ISL_519978 |
| VIC5214 | EPI_ISL_519979 |
| VIC5215 | EPI_ISL_519980 |
| VIC5217 | EPI_ISL_519982 |
| VIC5218 | EPI_ISL_519983 |
| VIC5219 | EPI_ISL_519984 |
| VIC5220 | EPI_ISL_519985 |
| VIC5221 | EPI_ISL_519986 |
| VIC5222 | EPI_ISL_519987 |
| VIC5223 | EPI_ISL_519988 |
| VIC5224 | EPI_ISL_519989 |
| VIC5225 | EPI_ISL_519990 |
| VIC5226 | EPI_ISL_519991 |
| VIC5227 | EPI_ISL_519992 |
| VIC5228 | EPI_ISL_519993 |
| VIC5229 | EPI_ISL_519994 |
| VIC5230 | EPI_ISL_519995 |
| VIC5231 | EPI_ISL_519996 |
| VIC5232 | EPI_ISL_519997 |
| VIC5233 | EPI_ISL_519998 |
| VIC5234 | EPI_ISL_519999 |
| VIC5235 | EPI_ISL_520000 |
| VIC5236 | EPI_ISL_520001 |
| VIC5237 | EPI_ISL_520002 |
| VIC5238 | EPI_ISL_520003 |
| VIC5239 | EPI_ISL_520004 |
| VIC5240 | EPI_ISL_520005 |
| VIC5242 | EPI_ISL_520007 |
| VIC5243 | EPI_ISL_520008 |
| VIC5244 | EPI_ISL_520009 |
| VIC5245 | EPI_ISL_520010 |

|         |                |
|---------|----------------|
| VIC5246 | EPI_ISL_520011 |
| VIC5247 | EPI_ISL_520012 |
| VIC5248 | EPI_ISL_520013 |
| VIC5249 | EPI_ISL_520014 |
| VIC525  | EPI_ISL_426792 |
| VIC5250 | EPI_ISL_520015 |
| VIC5251 | EPI_ISL_520016 |
| VIC5252 | EPI_ISL_520017 |
| VIC5253 | EPI_ISL_520018 |
| VIC5254 | EPI_ISL_520019 |
| VIC5255 | EPI_ISL_520020 |
| VIC5256 | EPI_ISL_520021 |
| VIC5257 | EPI_ISL_520022 |
| VIC5258 | EPI_ISL_520023 |
| VIC5259 | EPI_ISL_520024 |
| VIC5260 | EPI_ISL_520025 |
| VIC5261 | EPI_ISL_520026 |
| VIC5262 | EPI_ISL_520027 |
| VIC5263 | EPI_ISL_520028 |
| VIC5264 | EPI_ISL_520029 |
| VIC5265 | EPI_ISL_520030 |
| VIC5266 | EPI_ISL_520031 |
| VIC5267 | EPI_ISL_520032 |
| VIC5268 | EPI_ISL_520033 |
| VIC5269 | EPI_ISL_520034 |
| VIC527  | EPI_ISL_426793 |
| VIC5270 | EPI_ISL_520035 |
| VIC5271 | EPI_ISL_520036 |
| VIC5272 | EPI_ISL_520037 |
| VIC5273 | EPI_ISL_520038 |
| VIC5274 | EPI_ISL_520039 |
| VIC5275 | EPI_ISL_520040 |
| VIC5276 | EPI_ISL_520041 |
| VIC5277 | EPI_ISL_520042 |
| VIC5278 | EPI_ISL_520043 |
| VIC5279 | EPI_ISL_520044 |
| VIC5280 | EPI_ISL_520045 |
| VIC5281 | EPI_ISL_520046 |
| VIC5282 | EPI_ISL_520047 |
| VIC5283 | EPI_ISL_520048 |
| VIC5285 | EPI_ISL_520049 |
| VIC5286 | EPI_ISL_520050 |
| VIC5288 | Rejected       |
| VIC5289 | EPI_ISL_520052 |
| VIC5290 | EPI_ISL_520053 |
| VIC5291 | EPI_ISL_520054 |
| VIC5292 | EPI_ISL_520055 |
| VIC5293 | EPI_ISL_520056 |
| VIC5294 | EPI_ISL_520057 |
| VIC5295 | EPI_ISL_520058 |
| VIC5296 | EPI_ISL_520059 |
| VIC5297 | EPI_ISL_520060 |

|         |                |
|---------|----------------|
| VIC5298 | EPI_ISL_520061 |
| VIC5299 | EPI_ISL_520062 |
| VIC53   | EPI_ISL_419769 |
| VIC530  | EPI_ISL_426796 |
| VIC5300 | EPI_ISL_520063 |
| VIC5302 | EPI_ISL_520065 |
| VIC5303 | EPI_ISL_520066 |
| VIC5304 | EPI_ISL_520067 |
| VIC5305 | EPI_ISL_520068 |
| VIC5306 | EPI_ISL_520069 |
| VIC5307 | EPI_ISL_520070 |
| VIC5308 | EPI_ISL_520071 |
| VIC531  | EPI_ISL_426797 |
| VIC5310 | EPI_ISL_520073 |
| VIC5311 | EPI_ISL_520074 |
| VIC5312 | EPI_ISL_520075 |
| VIC5313 | EPI_ISL_520076 |
| VIC5314 | EPI_ISL_520077 |
| VIC5315 | EPI_ISL_520078 |
| VIC5316 | EPI_ISL_520079 |
| VIC5317 | EPI_ISL_520080 |
| VIC5318 | EPI_ISL_520081 |
| VIC5319 | EPI_ISL_520082 |
| VIC532  | EPI_ISL_426798 |
| VIC5320 | EPI_ISL_520083 |
| VIC5321 | EPI_ISL_520084 |
| VIC5322 | EPI_ISL_520085 |
| VIC5323 | EPI_ISL_520086 |
| VIC5324 | EPI_ISL_520087 |
| VIC5325 | EPI_ISL_520088 |
| VIC5326 | EPI_ISL_520089 |
| VIC5327 | EPI_ISL_520090 |
| VIC5329 | EPI_ISL_520092 |
| VIC533  | EPI_ISL_426799 |
| VIC5330 | EPI_ISL_520093 |
| VIC5331 | EPI_ISL_520094 |
| VIC5332 | EPI_ISL_520095 |
| VIC5333 | EPI_ISL_520096 |
| VIC5334 | EPI_ISL_520097 |
| VIC5335 | EPI_ISL_520098 |
| VIC5336 | EPI_ISL_520099 |
| VIC5337 | EPI_ISL_520100 |
| VIC5338 | EPI_ISL_520101 |
| VIC5339 | EPI_ISL_520102 |
| VIC534  | EPI_ISL_426800 |
| VIC5340 | EPI_ISL_520103 |
| VIC5341 | EPI_ISL_520104 |
| VIC5342 | EPI_ISL_520105 |
| VIC5343 | EPI_ISL_520106 |
| VIC5344 | EPI_ISL_520107 |
| VIC5345 | EPI_ISL_520108 |
| VIC5346 | EPI_ISL_520109 |

|         |                |
|---------|----------------|
| VIC5347 | EPI_ISL_520110 |
| VIC5348 | EPI_ISL_520111 |
| VIC5349 | EPI_ISL_520112 |
| VIC535  | EPI_ISL_426801 |
| VIC5350 | EPI_ISL_520113 |
| VIC5351 | EPI_ISL_520114 |
| VIC5352 | EPI_ISL_520115 |
| VIC5353 | EPI_ISL_520116 |
| VIC5354 | EPI_ISL_520117 |
| VIC5355 | EPI_ISL_520118 |
| VIC5357 | Rejected       |
| VIC5358 | EPI_ISL_520121 |
| VIC5359 | EPI_ISL_520122 |
| VIC5360 | EPI_ISL_520123 |
| VIC5361 | EPI_ISL_520124 |
| VIC5362 | EPI_ISL_520125 |
| VIC5363 | EPI_ISL_520126 |
| VIC5364 | EPI_ISL_520127 |
| VIC5365 | EPI_ISL_520128 |
| VIC5366 | EPI_ISL_520129 |
| VIC5367 | EPI_ISL_520130 |
| VIC5368 | EPI_ISL_520131 |
| VIC5369 | EPI_ISL_520132 |
| VIC5370 | EPI_ISL_520133 |
| VIC5371 | EPI_ISL_520134 |
| VIC5372 | EPI_ISL_520135 |
| VIC5373 | EPI_ISL_520136 |
| VIC5374 | EPI_ISL_520137 |
| VIC5375 | EPI_ISL_520138 |
| VIC5376 | EPI_ISL_520139 |
| VIC5377 | EPI_ISL_520140 |
| VIC5378 | EPI_ISL_520141 |
| VIC5379 | EPI_ISL_520142 |
| VIC538  | EPI_ISL_426804 |
| VIC5380 | EPI_ISL_520143 |
| VIC5381 | EPI_ISL_520144 |
| VIC5382 | EPI_ISL_520145 |
| VIC5383 | EPI_ISL_520146 |
| VIC5384 | EPI_ISL_520147 |
| VIC5385 | EPI_ISL_520148 |
| VIC5386 | EPI_ISL_520149 |
| VIC5387 | EPI_ISL_520150 |
| VIC5388 | EPI_ISL_520151 |
| VIC5389 | EPI_ISL_520152 |
| VIC5390 | EPI_ISL_520153 |
| VIC5391 | EPI_ISL_520154 |
| VIC5392 | EPI_ISL_520155 |
| VIC5393 | EPI_ISL_520156 |
| VIC5394 | EPI_ISL_520157 |
| VIC5395 | EPI_ISL_520158 |
| VIC5396 | EPI_ISL_520159 |
| VIC5397 | EPI_ISL_520160 |



|         |                 |
|---------|-----------------|
| VIC5398 | EPI_ISL_520161  |
| VIC5399 | EPI_ISL_520162  |
| VIC54   | EPI_ISL_419770  |
| VIC5400 | EPI_ISL_520163  |
| VIC5401 | EPI_ISL_520164  |
| VIC5402 | EPI_ISL_520165  |
| VIC5403 | EPI_ISL_520166  |
| VIC5404 | EPI_ISL_520167  |
| VIC5405 | EPI_ISL_520168  |
| VIC5406 | EPI_ISL_520169  |
| VIC5407 | EPI_ISL_520170  |
| VIC5408 | EPI_ISL_520171  |
| VIC5409 | EPI_ISL_520172  |
| VIC5410 | EPI_ISL_520173  |
| VIC5411 | EPI_ISL_520174  |
| VIC5412 | EPI_ISL_520175  |
| VIC5413 | EPI_ISL_520176  |
| VIC5414 | EPI_ISL_520177  |
| VIC5415 | EPI_ISL_520178  |
| VIC5416 | EPI_ISL_1055320 |
| VIC5417 | EPI_ISL_520179  |
| VIC5418 | EPI_ISL_520180  |
| VIC5432 | EPI_ISL_520183  |
| VIC5433 | EPI_ISL_520184  |
| VIC5434 | EPI_ISL_520185  |
| VIC5435 | EPI_ISL_520186  |
| VIC5437 | EPI_ISL_520188  |
| VIC544  | EPI_ISL_426807  |
| VIC5441 | EPI_ISL_520192  |
| VIC5442 | EPI_ISL_520193  |
| VIC5443 | EPI_ISL_520194  |
| VIC5444 | EPI_ISL_520195  |
| VIC5445 | EPI_ISL_520196  |
| VIC5446 | EPI_ISL_520197  |
| VIC5447 | EPI_ISL_520198  |
| VIC5448 | EPI_ISL_520199  |
| VIC5449 | EPI_ISL_520200  |
| VIC545  | EPI_ISL_426808  |
| VIC5452 | EPI_ISL_520202  |
| VIC5453 | EPI_ISL_520203  |
| VIC5454 | EPI_ISL_520204  |
| VIC5455 | EPI_ISL_520205  |
| VIC5456 | EPI_ISL_520206  |
| VIC5457 | EPI_ISL_520207  |
| VIC5458 | EPI_ISL_520208  |
| VIC5459 | EPI_ISL_520209  |
| VIC546  | EPI_ISL_426809  |
| VIC5460 | EPI_ISL_520210  |
| VIC5461 | EPI_ISL_520211  |
| VIC5462 | EPI_ISL_520212  |
| VIC5464 | EPI_ISL_520213  |
| VIC5465 | EPI_ISL_520214  |

|         |                |
|---------|----------------|
| VIC5466 | EPI_ISL_520215 |
| VIC5467 | EPI_ISL_520216 |
| VIC5468 | EPI_ISL_520217 |
| VIC5469 | EPI_ISL_520218 |
| VIC547  | EPI_ISL_426810 |
| VIC5470 | EPI_ISL_520219 |
| VIC5471 | EPI_ISL_520220 |
| VIC5472 | EPI_ISL_520221 |
| VIC5473 | EPI_ISL_520222 |
| VIC5474 | EPI_ISL_520223 |
| VIC5478 | EPI_ISL_520226 |
| VIC5479 | EPI_ISL_520227 |
| VIC548  | EPI_ISL_426811 |
| VIC5480 | EPI_ISL_520228 |
| VIC5481 | EPI_ISL_520229 |
| VIC5482 | EPI_ISL_520230 |
| VIC5483 | EPI_ISL_520231 |
| VIC5486 | EPI_ISL_520233 |
| VIC5488 | EPI_ISL_520234 |
| VIC5489 | EPI_ISL_520235 |
| VIC5490 | EPI_ISL_520236 |
| VIC5491 | EPI_ISL_520237 |
| VIC5492 | EPI_ISL_520238 |
| VIC5493 | EPI_ISL_520239 |
| VIC5494 | EPI_ISL_520240 |
| VIC5495 | EPI_ISL_520241 |
| VIC5497 | EPI_ISL_520243 |
| VIC5498 | EPI_ISL_520244 |
| VIC5499 | EPI_ISL_520245 |
| VIC55   | EPI_ISL_419776 |
| VIC550  | EPI_ISL_436689 |
| VIC5500 | EPI_ISL_520246 |
| VIC5501 | EPI_ISL_520247 |
| VIC5502 | EPI_ISL_520248 |
| VIC5503 | EPI_ISL_518339 |
| VIC5504 | EPI_ISL_518340 |
| VIC5506 | EPI_ISL_518342 |
| VIC5507 | EPI_ISL_518343 |
| VIC5508 | EPI_ISL_518344 |
| VIC5509 | EPI_ISL_518345 |
| VIC5510 | EPI_ISL_518346 |
| VIC5512 | EPI_ISL_518347 |
| VIC5514 | EPI_ISL_518349 |
| VIC5515 | EPI_ISL_518350 |
| VIC5516 | EPI_ISL_518351 |
| VIC5518 | EPI_ISL_518353 |
| VIC5519 | EPI_ISL_518354 |
| VIC5521 | EPI_ISL_518355 |
| VIC5522 | EPI_ISL_518356 |
| VIC5523 | EPI_ISL_518357 |
| VIC5524 | EPI_ISL_518358 |
| VIC5525 | EPI_ISL_518359 |

|         |                |
|---------|----------------|
| VIC5526 | EPI_ISL_518360 |
| VIC5528 | EPI_ISL_518361 |
| VIC5529 | EPI_ISL_518362 |
| VIC553  | EPI_ISL_426814 |
| VIC5531 | EPI_ISL_518363 |
| VIC5532 | EPI_ISL_518364 |
| VIC5534 | EPI_ISL_518365 |
| VIC5535 | EPI_ISL_518366 |
| VIC5536 | EPI_ISL_518367 |
| VIC5537 | EPI_ISL_518368 |
| VIC5538 | EPI_ISL_518369 |
| VIC5539 | EPI_ISL_518370 |
| VIC5540 | EPI_ISL_518371 |
| VIC5543 | EPI_ISL_518372 |
| VIC5544 | EPI_ISL_518373 |
| VIC5545 | EPI_ISL_518374 |
| VIC5546 | EPI_ISL_518375 |
| VIC5547 | EPI_ISL_518376 |
| VIC5548 | EPI_ISL_518377 |
| VIC5549 | EPI_ISL_518378 |
| VIC555  | EPI_ISL_426816 |
| VIC5551 | EPI_ISL_518379 |
| VIC5552 | EPI_ISL_518380 |
| VIC5553 | EPI_ISL_518381 |
| VIC5554 | EPI_ISL_518382 |
| VIC5555 | EPI_ISL_518383 |
| VIC5556 | EPI_ISL_518384 |
| VIC5557 | Rejected       |
| VIC5558 | EPI_ISL_518385 |
| VIC556  | EPI_ISL_426817 |
| VIC5567 | EPI_ISL_518386 |
| VIC5569 | EPI_ISL_518388 |
| VIC5570 | EPI_ISL_518389 |
| VIC5571 | EPI_ISL_518390 |
| VIC5572 | EPI_ISL_518391 |
| VIC5575 | EPI_ISL_518393 |
| VIC5576 | EPI_ISL_518394 |
| VIC5577 | EPI_ISL_518395 |
| VIC5578 | EPI_ISL_518396 |
| VIC5579 | EPI_ISL_518397 |
| VIC558  | EPI_ISL_426819 |
| VIC5580 | EPI_ISL_518398 |
| VIC5581 | EPI_ISL_518399 |
| VIC5582 | EPI_ISL_518400 |
| VIC5583 | EPI_ISL_518401 |
| VIC5585 | EPI_ISL_518402 |
| VIC5586 | EPI_ISL_518403 |
| VIC5587 | EPI_ISL_518404 |
| VIC5588 | EPI_ISL_518405 |
| VIC5589 | EPI_ISL_518406 |
| VIC5590 | EPI_ISL_518407 |
| VIC5591 | EPI_ISL_518408 |

|         |                |
|---------|----------------|
| VIC5594 | EPI_ISL_518410 |
| VIC5595 | EPI_ISL_518411 |
| VIC5596 | EPI_ISL_518412 |
| VIC5598 | EPI_ISL_518414 |
| VIC5599 | EPI_ISL_518415 |
| VIC56   | EPI_ISL_419777 |
| VIC560  | EPI_ISL_426821 |
| VIC5600 | EPI_ISL_518416 |
| VIC5602 | EPI_ISL_518417 |
| VIC5603 | EPI_ISL_518418 |
| VIC5605 | EPI_ISL_518420 |
| VIC5606 | EPI_ISL_518421 |
| VIC5607 | EPI_ISL_518422 |
| VIC5609 | EPI_ISL_518424 |
| VIC5610 | EPI_ISL_518425 |
| VIC5611 | EPI_ISL_518426 |
| VIC5613 | EPI_ISL_518428 |
| VIC5614 | EPI_ISL_518429 |
| VIC5615 | EPI_ISL_518430 |
| VIC5619 | EPI_ISL_518433 |
| VIC562  | EPI_ISL_426823 |
| VIC5620 | EPI_ISL_518434 |
| VIC5621 | EPI_ISL_518435 |
| VIC5622 | EPI_ISL_518436 |
| VIC5623 | EPI_ISL_518437 |
| VIC5624 | EPI_ISL_518438 |
| VIC5628 | EPI_ISL_518439 |
| VIC5629 | EPI_ISL_518440 |
| VIC563  | EPI_ISL_426824 |
| VIC5631 | EPI_ISL_518442 |
| VIC5632 | EPI_ISL_518443 |
| VIC5633 | EPI_ISL_518444 |
| VIC5634 | EPI_ISL_518445 |
| VIC5635 | EPI_ISL_518446 |
| VIC5637 | EPI_ISL_518448 |
| VIC5638 | EPI_ISL_518449 |
| VIC5639 | EPI_ISL_518450 |
| VIC5640 | EPI_ISL_518451 |
| VIC5641 | EPI_ISL_518452 |
| VIC5642 | EPI_ISL_518453 |
| VIC5644 | EPI_ISL_518455 |
| VIC5645 | EPI_ISL_518456 |
| VIC5646 | EPI_ISL_518457 |
| VIC5647 | EPI_ISL_518458 |
| VIC5648 | EPI_ISL_518459 |
| VIC5649 | EPI_ISL_518460 |
| VIC565  | EPI_ISL_426825 |
| VIC5650 | EPI_ISL_518461 |
| VIC5652 | EPI_ISL_518462 |
| VIC5653 | EPI_ISL_518463 |
| VIC5655 | EPI_ISL_518465 |
| VIC5656 | EPI_ISL_518466 |

|         |                |
|---------|----------------|
| VIC5657 | EPI_ISL_518467 |
| VIC5658 | EPI_ISL_518468 |
| VIC5659 | EPI_ISL_518469 |
| VIC566  | EPI_ISL_426826 |
| VIC5660 | EPI_ISL_518470 |
| VIC5661 | EPI_ISL_518471 |
| VIC5664 | Rejected       |
| VIC5665 | EPI_ISL_518473 |
| VIC5667 | EPI_ISL_518474 |
| VIC5668 | EPI_ISL_518475 |
| VIC5670 | EPI_ISL_518477 |
| VIC5672 | EPI_ISL_518479 |
| VIC5673 | EPI_ISL_518480 |
| VIC5674 | EPI_ISL_518481 |
| VIC5675 | EPI_ISL_518482 |
| VIC5676 | EPI_ISL_518483 |
| VIC5677 | EPI_ISL_518484 |
| VIC5679 | EPI_ISL_518486 |
| VIC5680 | EPI_ISL_518487 |
| VIC5682 | EPI_ISL_518488 |
| VIC5683 | EPI_ISL_518489 |
| VIC5684 | EPI_ISL_518490 |
| VIC5685 | EPI_ISL_518491 |
| VIC5686 | EPI_ISL_518492 |
| VIC5687 | EPI_ISL_518493 |
| VIC5688 | EPI_ISL_518494 |
| VIC5689 | EPI_ISL_518495 |
| VIC5690 | EPI_ISL_518496 |
| VIC5691 | EPI_ISL_518497 |
| VIC5692 | EPI_ISL_518498 |
| VIC5693 | EPI_ISL_518499 |
| VIC5694 | EPI_ISL_518500 |
| VIC5696 | EPI_ISL_518501 |
| VIC5697 | EPI_ISL_518502 |
| VIC5698 | EPI_ISL_518503 |
| VIC57   | EPI_ISL_419779 |
| VIC5700 | EPI_ISL_518504 |
| VIC5701 | EPI_ISL_518505 |
| VIC5702 | EPI_ISL_518506 |
| VIC5703 | EPI_ISL_518507 |
| VIC5704 | EPI_ISL_518508 |
| VIC5706 | EPI_ISL_518509 |
| VIC5707 | EPI_ISL_518510 |
| VIC5708 | EPI_ISL_518511 |
| VIC5709 | EPI_ISL_518512 |
| VIC571  | EPI_ISL_426831 |
| VIC5710 | EPI_ISL_518513 |
| VIC5711 | EPI_ISL_518514 |
| VIC5712 | EPI_ISL_518515 |
| VIC5713 | EPI_ISL_518516 |
| VIC5714 | EPI_ISL_518517 |
| VIC5716 | EPI_ISL_518518 |

|         |                |
|---------|----------------|
| VIC5717 | EPI_ISL_518519 |
| VIC5718 | EPI_ISL_518520 |
| VIC572  | EPI_ISL_426832 |
| VIC5720 | EPI_ISL_518522 |
| VIC5721 | EPI_ISL_518523 |
| VIC5722 | Rejected       |
| VIC5723 | EPI_ISL_518524 |
| VIC5724 | EPI_ISL_518525 |
| VIC5725 | EPI_ISL_518526 |
| VIC5726 | EPI_ISL_518527 |
| VIC5727 | EPI_ISL_518528 |
| VIC5728 | EPI_ISL_518529 |
| VIC5729 | EPI_ISL_518530 |
| VIC5730 | EPI_ISL_518531 |
| VIC5731 | EPI_ISL_518532 |
| VIC5732 | EPI_ISL_518533 |
| VIC5733 | EPI_ISL_518534 |
| VIC5734 | EPI_ISL_518535 |
| VIC5735 | EPI_ISL_518536 |
| VIC5736 | EPI_ISL_518537 |
| VIC5737 | EPI_ISL_518538 |
| VIC5738 | EPI_ISL_518539 |
| VIC5739 | EPI_ISL_518540 |
| VIC5740 | EPI_ISL_518541 |
| VIC5741 | EPI_ISL_518542 |
| VIC5742 | EPI_ISL_518543 |
| VIC5746 | EPI_ISL_518545 |
| VIC5747 | EPI_ISL_518546 |
| VIC5748 | EPI_ISL_518547 |
| VIC5749 | EPI_ISL_518548 |
| VIC5750 | EPI_ISL_518549 |
| VIC5752 | EPI_ISL_518550 |
| VIC5753 | EPI_ISL_518551 |
| VIC5754 | EPI_ISL_518552 |
| VIC5755 | EPI_ISL_518553 |
| VIC5756 | EPI_ISL_518554 |
| VIC5757 | EPI_ISL_518555 |
| VIC5758 | EPI_ISL_518556 |
| VIC5759 | EPI_ISL_518557 |
| VIC576  | EPI_ISL_426835 |
| VIC5760 | EPI_ISL_518558 |
| VIC5761 | EPI_ISL_518559 |
| VIC5762 | EPI_ISL_518560 |
| VIC5763 | EPI_ISL_518561 |
| VIC5764 | EPI_ISL_518562 |
| VIC5765 | EPI_ISL_518563 |
| VIC5766 | EPI_ISL_518564 |
| VIC5767 | EPI_ISL_518565 |
| VIC5768 | EPI_ISL_518566 |
| VIC5769 | EPI_ISL_518567 |
| VIC5770 | EPI_ISL_518568 |
| VIC5771 | EPI_ISL_518569 |

|         |                |
|---------|----------------|
| VIC5773 | EPI_ISL_518571 |
| VIC5774 | EPI_ISL_518572 |
| VIC5775 | EPI_ISL_518573 |
| VIC5776 | EPI_ISL_518574 |
| VIC5778 | EPI_ISL_518576 |
| VIC5779 | EPI_ISL_518577 |
| VIC5780 | EPI_ISL_518578 |
| VIC5781 | EPI_ISL_518579 |
| VIC5782 | EPI_ISL_518580 |
| VIC5784 | EPI_ISL_518581 |
| VIC5785 | EPI_ISL_518582 |
| VIC5787 | EPI_ISL_518584 |
| VIC5789 | EPI_ISL_518585 |
| VIC5790 | EPI_ISL_518586 |
| VIC5791 | EPI_ISL_518587 |
| VIC5792 | EPI_ISL_518588 |
| VIC5793 | EPI_ISL_518589 |
| VIC5794 | EPI_ISL_518590 |
| VIC5795 | EPI_ISL_518591 |
| VIC5796 | EPI_ISL_518592 |
| VIC5799 | EPI_ISL_518594 |
| VIC58   | EPI_ISL_419784 |
| VIC580  | EPI_ISL_426837 |
| VIC5800 | EPI_ISL_518595 |
| VIC5801 | EPI_ISL_518596 |
| VIC5802 | EPI_ISL_518597 |
| VIC5804 | EPI_ISL_518599 |
| VIC5805 | EPI_ISL_518600 |
| VIC5806 | EPI_ISL_518601 |
| VIC5807 | EPI_ISL_518602 |
| VIC5808 | EPI_ISL_518603 |
| VIC5809 | EPI_ISL_518604 |
| VIC5811 | EPI_ISL_518606 |
| VIC5814 | EPI_ISL_518609 |
| VIC5815 | Rejected       |
| VIC5816 | EPI_ISL_518610 |
| VIC5817 | EPI_ISL_518611 |
| VIC5818 | EPI_ISL_518612 |
| VIC5819 | EPI_ISL_518613 |
| VIC582  | EPI_ISL_426839 |
| VIC5820 | EPI_ISL_518614 |
| VIC5821 | EPI_ISL_518615 |
| VIC5822 | EPI_ISL_518616 |
| VIC5823 | EPI_ISL_518617 |
| VIC5824 | EPI_ISL_518618 |
| VIC5825 | EPI_ISL_518619 |
| VIC5826 | EPI_ISL_518620 |
| VIC5827 | EPI_ISL_518621 |
| VIC5828 | EPI_ISL_518622 |
| VIC5829 | EPI_ISL_518623 |
| VIC5830 | EPI_ISL_518624 |
| VIC5831 | EPI_ISL_518625 |

|         |                |
|---------|----------------|
| VIC5832 | EPI_ISL_518626 |
| VIC5834 | EPI_ISL_518628 |
| VIC5835 | EPI_ISL_518629 |
| VIC5836 | EPI_ISL_518630 |
| VIC5837 | EPI_ISL_518631 |
| VIC5838 | EPI_ISL_518632 |
| VIC5839 | EPI_ISL_518633 |
| VIC584  | EPI_ISL_426841 |
| VIC5840 | EPI_ISL_518634 |
| VIC5841 | EPI_ISL_518635 |
| VIC5843 | EPI_ISL_518637 |
| VIC5844 | EPI_ISL_518638 |
| VIC5845 | EPI_ISL_518639 |
| VIC5846 | EPI_ISL_518640 |
| VIC5847 | EPI_ISL_518641 |
| VIC5849 | EPI_ISL_518642 |
| VIC5850 | EPI_ISL_518643 |
| VIC5851 | EPI_ISL_518644 |
| VIC5852 | EPI_ISL_518645 |
| VIC5853 | EPI_ISL_518646 |
| VIC5854 | EPI_ISL_518647 |
| VIC5855 | EPI_ISL_518648 |
| VIC5856 | EPI_ISL_518649 |
| VIC5857 | EPI_ISL_518650 |
| VIC5858 | EPI_ISL_518651 |
| VIC5859 | EPI_ISL_518652 |
| VIC5860 | EPI_ISL_518653 |
| VIC5861 | EPI_ISL_518654 |
| VIC5862 | EPI_ISL_518655 |
| VIC5863 | EPI_ISL_518656 |
| VIC5864 | EPI_ISL_518657 |
| VIC5867 | EPI_ISL_518658 |
| VIC5869 | EPI_ISL_518659 |
| VIC587  | EPI_ISL_426844 |
| VIC5876 | EPI_ISL_518662 |
| VIC5878 | EPI_ISL_518663 |
| VIC5881 | EPI_ISL_518664 |
| VIC5882 | EPI_ISL_518665 |
| VIC5883 | EPI_ISL_518666 |
| VIC5884 | EPI_ISL_518667 |
| VIC5885 | EPI_ISL_518668 |
| VIC5886 | EPI_ISL_518669 |
| VIC5887 | EPI_ISL_518670 |
| VIC5889 | EPI_ISL_518671 |
| VIC589  | EPI_ISL_426846 |
| VIC5890 | EPI_ISL_518672 |
| VIC5891 | EPI_ISL_518673 |
| VIC5892 | EPI_ISL_518674 |
| VIC5893 | EPI_ISL_518675 |
| VIC5894 | EPI_ISL_518676 |
| VIC5895 | Rejected       |
| VIC5896 | EPI_ISL_518677 |



|         |                |
|---------|----------------|
| VIC5897 | EPI_ISL_518678 |
| VIC5899 | EPI_ISL_518680 |
| VIC59   | EPI_ISL_419771 |
| VIC5900 | EPI_ISL_518681 |
| VIC5902 | EPI_ISL_518682 |
| VIC5903 | EPI_ISL_518683 |
| VIC5904 | EPI_ISL_518684 |
| VIC5906 | EPI_ISL_518685 |
| VIC5907 | EPI_ISL_518686 |
| VIC5908 | EPI_ISL_518687 |
| VIC5909 | EPI_ISL_518688 |
| VIC5910 | EPI_ISL_518689 |
| VIC5911 | EPI_ISL_518690 |
| VIC5912 | EPI_ISL_518691 |
| VIC5913 | EPI_ISL_518692 |
| VIC5914 | EPI_ISL_518693 |
| VIC5915 | EPI_ISL_518694 |
| VIC5916 | EPI_ISL_518695 |
| VIC5917 | EPI_ISL_518696 |
| VIC5918 | EPI_ISL_518697 |
| VIC5919 | EPI_ISL_518698 |
| VIC5920 | EPI_ISL_518699 |
| VIC5922 | EPI_ISL_518701 |
| VIC5923 | EPI_ISL_518702 |
| VIC5924 | EPI_ISL_518703 |
| VIC5925 | EPI_ISL_518704 |
| VIC5926 | EPI_ISL_518705 |
| VIC5927 | EPI_ISL_518706 |
| VIC5928 | EPI_ISL_518707 |
| VIC5929 | EPI_ISL_518708 |
| VIC593  | EPI_ISL_426850 |
| VIC5930 | EPI_ISL_518709 |
| VIC5931 | EPI_ISL_518710 |
| VIC5932 | EPI_ISL_518711 |
| VIC5933 | EPI_ISL_518712 |
| VIC5934 | EPI_ISL_518713 |
| VIC5935 | EPI_ISL_518714 |
| VIC5937 | EPI_ISL_518716 |
| VIC5938 | EPI_ISL_518717 |
| VIC5939 | EPI_ISL_518718 |
| VIC594  | EPI_ISL_426851 |
| VIC5940 | EPI_ISL_518719 |
| VIC5941 | EPI_ISL_518720 |
| VIC5942 | EPI_ISL_518721 |
| VIC5943 | EPI_ISL_518722 |
| VIC5944 | EPI_ISL_518723 |
| VIC5945 | EPI_ISL_518724 |
| VIC5947 | EPI_ISL_518725 |
| VIC5950 | EPI_ISL_518726 |
| VIC5951 | EPI_ISL_518727 |
| VIC5952 | EPI_ISL_518728 |
| VIC5953 | EPI_ISL_518729 |

|         |                |
|---------|----------------|
| VIC5954 | EPI_ISL_518730 |
| VIC5955 | EPI_ISL_518731 |
| VIC5957 | EPI_ISL_518732 |
| VIC5958 | EPI_ISL_518733 |
| VIC5959 | EPI_ISL_518734 |
| VIC5960 | EPI_ISL_518735 |
| VIC5961 | EPI_ISL_518736 |
| VIC5962 | EPI_ISL_518737 |
| VIC5963 | EPI_ISL_518738 |
| VIC5964 | EPI_ISL_518739 |
| VIC5965 | EPI_ISL_518740 |
| VIC5966 | EPI_ISL_518741 |
| VIC5967 | EPI_ISL_518742 |
| VIC5968 | EPI_ISL_518743 |
| VIC5969 | EPI_ISL_518744 |
| VIC597  | EPI_ISL_426854 |
| VIC5970 | EPI_ISL_518745 |
| VIC5971 | EPI_ISL_518746 |
| VIC5972 | EPI_ISL_518747 |
| VIC5973 | EPI_ISL_518748 |
| VIC5974 | EPI_ISL_518749 |
| VIC5975 | EPI_ISL_518750 |
| VIC5976 | EPI_ISL_518751 |
| VIC5977 | EPI_ISL_518752 |
| VIC5978 | EPI_ISL_518753 |
| VIC5979 | EPI_ISL_518754 |
| VIC598  | EPI_ISL_426855 |
| VIC5980 | EPI_ISL_518755 |
| VIC5981 | EPI_ISL_518756 |
| VIC5982 | EPI_ISL_518757 |
| VIC5983 | EPI_ISL_518758 |
| VIC5984 | EPI_ISL_518759 |
| VIC5985 | EPI_ISL_518760 |
| VIC5986 | EPI_ISL_518761 |
| VIC5987 | EPI_ISL_518762 |
| VIC5988 | EPI_ISL_518763 |
| VIC5989 | EPI_ISL_518764 |
| VIC599  | EPI_ISL_426856 |
| VIC5990 | EPI_ISL_518765 |
| VIC5991 | EPI_ISL_518766 |
| VIC5992 | EPI_ISL_518767 |
| VIC5993 | EPI_ISL_518768 |
| VIC5994 | EPI_ISL_518769 |
| VIC5995 | EPI_ISL_518770 |
| VIC5996 | EPI_ISL_518771 |
| VIC5998 | EPI_ISL_518773 |
| VIC5999 | EPI_ISL_518774 |
| VIC60   | EPI_ISL_419772 |
| VIC6000 | EPI_ISL_518775 |
| VIC6001 | EPI_ISL_518776 |
| VIC6002 | EPI_ISL_518777 |
| VIC6003 | EPI_ISL_518778 |

|         |                |
|---------|----------------|
| VIC6004 | EPI_ISL_518779 |
| VIC6005 | EPI_ISL_518780 |
| VIC6006 | EPI_ISL_518781 |
| VIC6007 | EPI_ISL_518782 |
| VIC6008 | EPI_ISL_518783 |
| VIC6009 | EPI_ISL_518784 |
| VIC6010 | EPI_ISL_518785 |
| VIC6011 | EPI_ISL_518786 |
| VIC6012 | EPI_ISL_518787 |
| VIC6013 | EPI_ISL_518788 |
| VIC6014 | EPI_ISL_518789 |
| VIC6015 | EPI_ISL_518790 |
| VIC6016 | EPI_ISL_518791 |
| VIC6017 | EPI_ISL_518792 |
| VIC6019 | EPI_ISL_518794 |
| VIC6020 | EPI_ISL_518795 |
| VIC6021 | EPI_ISL_518796 |
| VIC6023 | EPI_ISL_518064 |
| VIC6024 | EPI_ISL_518065 |
| VIC6025 | EPI_ISL_518066 |
| VIC6026 | EPI_ISL_518067 |
| VIC6027 | EPI_ISL_518068 |
| VIC6028 | EPI_ISL_518069 |
| VIC6029 | EPI_ISL_518070 |
| VIC6030 | EPI_ISL_518071 |
| VIC6031 | EPI_ISL_518072 |
| VIC6032 | EPI_ISL_518073 |
| VIC6033 | EPI_ISL_518074 |
| VIC6034 | EPI_ISL_518075 |
| VIC6035 | EPI_ISL_518076 |
| VIC6036 | EPI_ISL_518077 |
| VIC6037 | EPI_ISL_518078 |
| VIC6038 | EPI_ISL_518079 |
| VIC6039 | EPI_ISL_518080 |
| VIC6040 | EPI_ISL_518081 |
| VIC6041 | EPI_ISL_518082 |
| VIC6042 | EPI_ISL_518083 |
| VIC6043 | EPI_ISL_518084 |
| VIC6044 | EPI_ISL_518085 |
| VIC6045 | EPI_ISL_518086 |
| VIC6048 | EPI_ISL_518088 |
| VIC6049 | EPI_ISL_518089 |
| VIC605  | EPI_ISL_426860 |
| VIC6050 | EPI_ISL_518090 |
| VIC6051 | EPI_ISL_518091 |
| VIC6052 | EPI_ISL_518092 |
| VIC6054 | EPI_ISL_518093 |
| VIC6055 | EPI_ISL_518094 |
| VIC6056 | Rejected       |
| VIC6058 | EPI_ISL_518096 |
| VIC6059 | EPI_ISL_518097 |
| VIC606  | EPI_ISL_426861 |

|         |                |
|---------|----------------|
| VIC607  | EPI_ISL_426862 |
| VIC6070 | EPI_ISL_518099 |
| VIC6071 | EPI_ISL_518100 |
| VIC6072 | EPI_ISL_518101 |
| VIC6076 | EPI_ISL_518103 |
| VIC6077 | EPI_ISL_518104 |
| VIC6078 | EPI_ISL_518105 |
| VIC6079 | EPI_ISL_518106 |
| VIC6083 | EPI_ISL_518109 |
| VIC6087 | EPI_ISL_518112 |
| VIC6088 | EPI_ISL_518113 |
| VIC6089 | EPI_ISL_518114 |
| VIC6092 | EPI_ISL_518117 |
| VIC6098 | EPI_ISL_518122 |
| VIC6099 | EPI_ISL_518123 |
| VIC61   | EPI_ISL_419773 |
| VIC610  | EPI_ISL_426864 |
| VIC6105 | EPI_ISL_518126 |
| VIC6106 | EPI_ISL_518127 |
| VIC6107 | EPI_ISL_518128 |
| VIC611  | EPI_ISL_426865 |
| VIC6111 | EPI_ISL_518131 |
| VIC6113 | EPI_ISL_518132 |
| VIC6114 | EPI_ISL_518133 |
| VIC6116 | EPI_ISL_518134 |
| VIC6117 | EPI_ISL_518135 |
| VIC612  | EPI_ISL_426866 |
| VIC6120 | EPI_ISL_518138 |
| VIC6121 | EPI_ISL_518139 |
| VIC6123 | EPI_ISL_518140 |
| VIC6126 | EPI_ISL_518141 |
| VIC6128 | EPI_ISL_518142 |
| VIC6135 | EPI_ISL_518147 |
| VIC6138 | EPI_ISL_518149 |
| VIC6139 | EPI_ISL_518150 |
| VIC6140 | EPI_ISL_518151 |
| VIC6142 | EPI_ISL_518153 |
| VIC6143 | EPI_ISL_518154 |
| VIC6144 | EPI_ISL_518155 |
| VIC6145 | EPI_ISL_518156 |
| VIC6146 | EPI_ISL_518157 |
| VIC6147 | EPI_ISL_518158 |
| VIC6149 | EPI_ISL_518160 |
| VIC615  | EPI_ISL_426870 |
| VIC6150 | EPI_ISL_518161 |
| VIC6151 | EPI_ISL_518162 |
| VIC6153 | Rejected       |
| VIC6154 | EPI_ISL_518163 |
| VIC6156 | Rejected       |
| VIC6158 | EPI_ISL_518165 |
| VIC6159 | EPI_ISL_518166 |
| VIC6161 | EPI_ISL_518167 |

|         |                |
|---------|----------------|
| VIC6162 | EPI_ISL_518168 |
| VIC6163 | EPI_ISL_518169 |
| VIC6164 | EPI_ISL_518170 |
| VIC6165 | EPI_ISL_518171 |
| VIC6166 | EPI_ISL_518172 |
| VIC6168 | EPI_ISL_518174 |
| VIC6169 | EPI_ISL_518175 |
| VIC617  | EPI_ISL_426872 |
| VIC6174 | EPI_ISL_518179 |
| VIC6175 | EPI_ISL_518180 |
| VIC6176 | EPI_ISL_518181 |
| VIC6177 | EPI_ISL_518182 |
| VIC6180 | EPI_ISL_518185 |
| VIC6181 | EPI_ISL_518186 |
| VIC619  | EPI_ISL_426923 |
| VIC6191 | EPI_ISL_518193 |
| VIC6192 | EPI_ISL_518194 |
| VIC6193 | EPI_ISL_518195 |
| VIC6194 | EPI_ISL_518196 |
| VIC6196 | EPI_ISL_518198 |
| VIC6197 | EPI_ISL_518199 |
| VIC6198 | EPI_ISL_518200 |
| VIC6199 | EPI_ISL_518201 |
| VIC62   | EPI_ISL_419774 |
| VIC620  | EPI_ISL_426924 |
| VIC6200 | EPI_ISL_518202 |
| VIC6203 | EPI_ISL_518204 |
| VIC6205 | EPI_ISL_518206 |
| VIC621  | EPI_ISL_426925 |
| VIC622  | EPI_ISL_426926 |
| VIC6220 | EPI_ISL_518218 |
| VIC6221 | EPI_ISL_518219 |
| VIC6222 | EPI_ISL_518220 |
| VIC6227 | EPI_ISL_518224 |
| VIC623  | EPI_ISL_426927 |
| VIC6235 | EPI_ISL_518229 |
| VIC6236 | EPI_ISL_518230 |
| VIC6237 | EPI_ISL_518231 |
| VIC6238 | EPI_ISL_518232 |
| VIC624  | EPI_ISL_426928 |
| VIC6240 | EPI_ISL_518234 |
| VIC6241 | EPI_ISL_518235 |
| VIC6242 | EPI_ISL_518236 |
| VIC6246 | EPI_ISL_518239 |
| VIC6247 | EPI_ISL_518240 |
| VIC6248 | EPI_ISL_518241 |
| VIC6249 | EPI_ISL_518242 |
| VIC625  | EPI_ISL_426929 |
| VIC6250 | EPI_ISL_518243 |
| VIC6254 | EPI_ISL_518246 |
| VIC6255 | EPI_ISL_518247 |
| VIC6256 | EPI_ISL_518248 |

|         |                |
|---------|----------------|
| VIC6257 | EPI_ISL_518249 |
| VIC6259 | EPI_ISL_518250 |
| VIC626  | EPI_ISL_426930 |
| VIC6260 | EPI_ISL_518251 |
| VIC6261 | EPI_ISL_518252 |
| VIC6263 | EPI_ISL_518254 |
| VIC6265 | EPI_ISL_518255 |
| VIC6266 | EPI_ISL_518256 |
| VIC6267 | EPI_ISL_518257 |
| VIC6268 | EPI_ISL_518258 |
| VIC6269 | EPI_ISL_518259 |
| VIC627  | EPI_ISL_426931 |
| VIC6271 | EPI_ISL_518261 |
| VIC6272 | EPI_ISL_518262 |
| VIC6275 | EPI_ISL_518264 |
| VIC6276 | EPI_ISL_518265 |
| VIC6277 | EPI_ISL_518266 |
| VIC6278 | EPI_ISL_518267 |
| VIC6279 | EPI_ISL_518268 |
| VIC628  | EPI_ISL_426932 |
| VIC6281 | EPI_ISL_518269 |
| VIC6282 | EPI_ISL_518270 |
| VIC6283 | EPI_ISL_518271 |
| VIC6284 | EPI_ISL_518272 |
| VIC6285 | EPI_ISL_518273 |
| VIC6286 | EPI_ISL_518274 |
| VIC6287 | EPI_ISL_518275 |
| VIC6288 | EPI_ISL_518276 |
| VIC6289 | EPI_ISL_518277 |
| VIC6290 | EPI_ISL_518278 |
| VIC6291 | EPI_ISL_518279 |
| VIC6292 | EPI_ISL_518280 |
| VIC6294 | EPI_ISL_518282 |
| VIC6295 | EPI_ISL_518283 |
| VIC6296 | EPI_ISL_518284 |
| VIC6297 | EPI_ISL_518285 |
| VIC6298 | EPI_ISL_518286 |
| VIC6299 | EPI_ISL_518287 |
| VIC63   | EPI_ISL_419775 |
| VIC6300 | EPI_ISL_518288 |
| VIC6301 | EPI_ISL_518289 |
| VIC6302 | EPI_ISL_518290 |
| VIC6303 | Rejected       |
| VIC6304 | EPI_ISL_518292 |
| VIC6305 | EPI_ISL_518293 |
| VIC6306 | EPI_ISL_518294 |
| VIC6307 | EPI_ISL_518295 |
| VIC6308 | EPI_ISL_518296 |
| VIC6309 | EPI_ISL_518297 |
| VIC6310 | EPI_ISL_518298 |
| VIC6311 | EPI_ISL_518299 |
| VIC6312 | EPI_ISL_518300 |

|         |                |
|---------|----------------|
| VIC6313 | EPI_ISL_518301 |
| VIC6314 | EPI_ISL_518302 |
| VIC6315 | EPI_ISL_518303 |
| VIC6317 | EPI_ISL_518305 |
| VIC6318 | EPI_ISL_518306 |
| VIC6319 | EPI_ISL_518307 |
| VIC6320 | EPI_ISL_518308 |
| VIC6322 | EPI_ISL_518309 |
| VIC6323 | EPI_ISL_518310 |
| VIC6324 | EPI_ISL_518311 |
| VIC6325 | EPI_ISL_518312 |
| VIC6326 | EPI_ISL_518313 |
| VIC6327 | EPI_ISL_518314 |
| VIC6329 | EPI_ISL_518315 |
| VIC633  | EPI_ISL_426875 |
| VIC6332 | EPI_ISL_518316 |
| VIC6336 | EPI_ISL_518319 |
| VIC6339 | EPI_ISL_518321 |
| VIC6340 | EPI_ISL_518322 |
| VIC6341 | EPI_ISL_518323 |
| VIC6342 | EPI_ISL_518324 |
| VIC6343 | EPI_ISL_518325 |
| VIC6346 | EPI_ISL_518326 |
| VIC6347 | EPI_ISL_518327 |
| VIC6348 | EPI_ISL_518328 |
| VIC6349 | EPI_ISL_518329 |
| VIC635  | EPI_ISL_426876 |
| VIC6350 | EPI_ISL_518330 |
| VIC6351 | EPI_ISL_518331 |
| VIC6353 | EPI_ISL_518333 |
| VIC6354 | EPI_ISL_518334 |
| VIC6355 | EPI_ISL_518335 |
| VIC6356 | EPI_ISL_518336 |
| VIC6357 | EPI_ISL_518337 |
| VIC6358 | EPI_ISL_521154 |
| VIC6359 | Rejected       |
| VIC636  | EPI_ISL_426877 |
| VIC6360 | EPI_ISL_521156 |
| VIC6361 | EPI_ISL_521157 |
| VIC6362 | EPI_ISL_521158 |
| VIC6363 | EPI_ISL_521159 |
| VIC6365 | EPI_ISL_521160 |
| VIC6366 | EPI_ISL_521161 |
| VIC6367 | EPI_ISL_521162 |
| VIC6368 | EPI_ISL_521163 |
| VIC637  | EPI_ISL_426933 |
| VIC6370 | EPI_ISL_521164 |
| VIC6371 | EPI_ISL_521165 |
| VIC6372 | EPI_ISL_521166 |
| VIC6373 | EPI_ISL_521167 |
| VIC6374 | EPI_ISL_521168 |
| VIC6375 | Rejected       |

|         |                |
|---------|----------------|
| VIC6376 | EPI_ISL_521170 |
| VIC6377 | EPI_ISL_521171 |
| VIC6379 | EPI_ISL_563991 |
| VIC638  | EPI_ISL_426934 |
| VIC6380 | EPI_ISL_521172 |
| VIC6381 | EPI_ISL_521173 |
| VIC6382 | EPI_ISL_521174 |
| VIC6383 | EPI_ISL_521175 |
| VIC6384 | EPI_ISL_521176 |
| VIC6385 | EPI_ISL_521177 |
| VIC6386 | EPI_ISL_521178 |
| VIC6387 | EPI_ISL_521179 |
| VIC6388 | EPI_ISL_521180 |
| VIC6389 | EPI_ISL_521181 |
| VIC639  | EPI_ISL_426935 |
| VIC6390 | EPI_ISL_521182 |
| VIC6391 | EPI_ISL_521183 |
| VIC6392 | EPI_ISL_521184 |
| VIC6393 | EPI_ISL_521185 |
| VIC6394 | EPI_ISL_521186 |
| VIC6395 | EPI_ISL_521187 |
| VIC6396 | EPI_ISL_521188 |
| VIC6397 | EPI_ISL_521189 |
| VIC6398 | EPI_ISL_521190 |
| VIC6399 | EPI_ISL_521191 |
| VIC64   | EPI_ISL_419778 |
| VIC6400 | EPI_ISL_521192 |
| VIC6402 | EPI_ISL_521194 |
| VIC6403 | EPI_ISL_521195 |
| VIC6404 | EPI_ISL_521196 |
| VIC6405 | EPI_ISL_521197 |
| VIC6406 | EPI_ISL_521198 |
| VIC6407 | EPI_ISL_521199 |
| VIC6408 | EPI_ISL_521200 |
| VIC6409 | EPI_ISL_521201 |
| VIC641  | EPI_ISL_426937 |
| VIC6410 | EPI_ISL_521202 |
| VIC6411 | EPI_ISL_521203 |
| VIC6412 | EPI_ISL_521204 |
| VIC6413 | EPI_ISL_521205 |
| VIC6414 | EPI_ISL_521206 |
| VIC6415 | EPI_ISL_521207 |
| VIC6416 | EPI_ISL_521208 |
| VIC6419 | EPI_ISL_521210 |
| VIC6421 | EPI_ISL_521212 |
| VIC6422 | EPI_ISL_521213 |
| VIC6423 | EPI_ISL_521214 |
| VIC6424 | EPI_ISL_521215 |
| VIC6426 | EPI_ISL_521217 |
| VIC6427 | EPI_ISL_521218 |
| VIC6428 | EPI_ISL_521219 |
| VIC6429 | EPI_ISL_521220 |



|         |                |
|---------|----------------|
| VIC6430 | EPI_ISL_521221 |
| VIC644  | EPI_ISL_426940 |
| VIC6449 | EPI_ISL_521227 |
| VIC645  | EPI_ISL_426941 |
| VIC6450 | EPI_ISL_521228 |
| VIC6451 | EPI_ISL_521229 |
| VIC6452 | EPI_ISL_521230 |
| VIC6453 | EPI_ISL_521231 |
| VIC6454 | EPI_ISL_521232 |
| VIC6456 | EPI_ISL_521234 |
| VIC6457 | EPI_ISL_521235 |
| VIC6459 | EPI_ISL_521237 |
| VIC646  | EPI_ISL_426942 |
| VIC6460 | EPI_ISL_521238 |
| VIC6461 | EPI_ISL_521239 |
| VIC6462 | EPI_ISL_521240 |
| VIC6463 | EPI_ISL_521241 |
| VIC6465 | EPI_ISL_521243 |
| VIC6466 | EPI_ISL_521244 |
| VIC6467 | EPI_ISL_521245 |
| VIC6468 | EPI_ISL_521246 |
| VIC6469 | EPI_ISL_521247 |
| VIC647  | EPI_ISL_426943 |
| VIC6470 | EPI_ISL_521248 |
| VIC6471 | EPI_ISL_521249 |
| VIC6472 | EPI_ISL_521250 |
| VIC6473 | EPI_ISL_521251 |
| VIC6474 | EPI_ISL_521252 |
| VIC6475 | EPI_ISL_521253 |
| VIC6476 | EPI_ISL_521254 |
| VIC6477 | EPI_ISL_521255 |
| VIC6478 | EPI_ISL_521256 |
| VIC6479 | EPI_ISL_521257 |
| VIC6480 | EPI_ISL_521258 |
| VIC6481 | EPI_ISL_521259 |
| VIC6482 | EPI_ISL_521260 |
| VIC6483 | EPI_ISL_521261 |
| VIC6484 | EPI_ISL_521262 |
| VIC6485 | EPI_ISL_521263 |
| VIC6486 | EPI_ISL_521264 |
| VIC6487 | EPI_ISL_521265 |
| VIC6488 | EPI_ISL_521266 |
| VIC6489 | EPI_ISL_521267 |
| VIC6490 | EPI_ISL_521268 |
| VIC6493 | EPI_ISL_563993 |
| VIC6494 | EPI_ISL_563994 |
| VIC6495 | EPI_ISL_521270 |
| VIC6496 | EPI_ISL_521271 |
| VIC6497 | EPI_ISL_521272 |
| VIC6499 | EPI_ISL_521274 |
| VIC65   | Rejected       |
| VIC6500 | Rejected       |

|         |                |
|---------|----------------|
| VIC6501 | EPI_ISL_521275 |
| VIC6502 | EPI_ISL_521276 |
| VIC6503 | EPI_ISL_521277 |
| VIC6504 | EPI_ISL_521278 |
| VIC6505 | EPI_ISL_521279 |
| VIC6506 | EPI_ISL_521280 |
| VIC6507 | EPI_ISL_521281 |
| VIC6508 | EPI_ISL_521282 |
| VIC6509 | EPI_ISL_521283 |
| VIC651  | EPI_ISL_426947 |
| VIC6512 | EPI_ISL_521286 |
| VIC6516 | EPI_ISL_521288 |
| VIC6518 | EPI_ISL_521289 |
| VIC6519 | EPI_ISL_521290 |
| VIC652  | EPI_ISL_426948 |
| VIC6520 | EPI_ISL_521291 |
| VIC6521 | EPI_ISL_521292 |
| VIC6523 | EPI_ISL_521293 |
| VIC6524 | EPI_ISL_521294 |
| VIC6525 | EPI_ISL_521295 |
| VIC6526 | EPI_ISL_521296 |
| VIC6527 | EPI_ISL_521297 |
| VIC6528 | EPI_ISL_521298 |
| VIC6529 | EPI_ISL_521299 |
| VIC653  | EPI_ISL_426949 |
| VIC6530 | EPI_ISL_521300 |
| VIC6531 | EPI_ISL_521301 |
| VIC6532 | EPI_ISL_521302 |
| VIC6533 | EPI_ISL_521303 |
| VIC6534 | EPI_ISL_521304 |
| VIC6535 | EPI_ISL_521305 |
| VIC6536 | EPI_ISL_521306 |
| VIC6537 | EPI_ISL_521307 |
| VIC6538 | EPI_ISL_521308 |
| VIC654  | EPI_ISL_426950 |
| VIC6540 | EPI_ISL_521310 |
| VIC6541 | EPI_ISL_521311 |
| VIC6542 | EPI_ISL_521312 |
| VIC6543 | EPI_ISL_521313 |
| VIC6544 | EPI_ISL_521314 |
| VIC6545 | EPI_ISL_521315 |
| VIC6546 | EPI_ISL_521316 |
| VIC6547 | EPI_ISL_521317 |
| VIC6549 | EPI_ISL_521318 |
| VIC655  | EPI_ISL_426951 |
| VIC6552 | EPI_ISL_521320 |
| VIC6553 | EPI_ISL_521321 |
| VIC6555 | EPI_ISL_521323 |
| VIC6556 | EPI_ISL_521324 |
| VIC6557 | EPI_ISL_521325 |
| VIC6558 | EPI_ISL_521326 |
| VIC656  | EPI_ISL_426952 |

|         |                |
|---------|----------------|
| VIC6560 | EPI_ISL_521327 |
| VIC6561 | EPI_ISL_521328 |
| VIC6563 | EPI_ISL_521329 |
| VIC6564 | EPI_ISL_521330 |
| VIC6566 | EPI_ISL_521332 |
| VIC6568 | EPI_ISL_521334 |
| VIC6569 | EPI_ISL_521335 |
| VIC657  | EPI_ISL_426953 |
| VIC6572 | EPI_ISL_521338 |
| VIC6573 | EPI_ISL_521339 |
| VIC6575 | EPI_ISL_521340 |
| VIC6577 | EPI_ISL_521341 |
| VIC6578 | EPI_ISL_521342 |
| VIC6579 | EPI_ISL_521343 |
| VIC658  | EPI_ISL_426954 |
| VIC6581 | EPI_ISL_521345 |
| VIC6582 | EPI_ISL_521346 |
| VIC6583 | EPI_ISL_521347 |
| VIC6585 | EPI_ISL_521348 |
| VIC6586 | EPI_ISL_521349 |
| VIC6587 | EPI_ISL_521350 |
| VIC659  | EPI_ISL_426955 |
| VIC6590 | EPI_ISL_521352 |
| VIC6591 | EPI_ISL_521353 |
| VIC6592 | EPI_ISL_521354 |
| VIC6593 | EPI_ISL_521355 |
| VIC6594 | EPI_ISL_521356 |
| VIC6595 | EPI_ISL_521357 |
| VIC6596 | EPI_ISL_521358 |
| VIC6597 | EPI_ISL_521359 |
| VIC6599 | EPI_ISL_521361 |
| VIC66   | EPI_ISL_419780 |
| VIC660  | EPI_ISL_426956 |
| VIC6601 | EPI_ISL_521363 |
| VIC6602 | EPI_ISL_521364 |
| VIC6603 | EPI_ISL_521365 |
| VIC6604 | EPI_ISL_521366 |
| VIC6605 | EPI_ISL_521367 |
| VIC6606 | EPI_ISL_521368 |
| VIC6607 | EPI_ISL_521369 |
| VIC6608 | EPI_ISL_521370 |
| VIC6609 | EPI_ISL_521371 |
| VIC661  | EPI_ISL_426957 |
| VIC6610 | EPI_ISL_521372 |
| VIC6613 | EPI_ISL_521375 |
| VIC6614 | EPI_ISL_521376 |
| VIC6615 | EPI_ISL_521377 |
| VIC6617 | EPI_ISL_521379 |
| VIC6618 | EPI_ISL_521380 |
| VIC6619 | EPI_ISL_521381 |
| VIC662  | EPI_ISL_426958 |
| VIC6620 | EPI_ISL_521382 |

|         |                |
|---------|----------------|
| VIC6622 | EPI_ISL_521383 |
| VIC6624 | EPI_ISL_521384 |
| VIC6625 | EPI_ISL_521385 |
| VIC6626 | EPI_ISL_521386 |
| VIC6627 | EPI_ISL_521387 |
| VIC6628 | EPI_ISL_521388 |
| VIC6629 | EPI_ISL_521389 |
| VIC6633 | EPI_ISL_521393 |
| VIC6634 | EPI_ISL_521394 |
| VIC6636 | EPI_ISL_521395 |
| VIC6637 | EPI_ISL_521396 |
| VIC6638 | EPI_ISL_521397 |
| VIC6639 | EPI_ISL_521398 |
| VIC664  | EPI_ISL_426960 |
| VIC6640 | EPI_ISL_521399 |
| VIC6643 | EPI_ISL_521400 |
| VIC6645 | EPI_ISL_521402 |
| VIC6646 | EPI_ISL_521403 |
| VIC6647 | EPI_ISL_521404 |
| VIC6648 | EPI_ISL_521405 |
| VIC6649 | EPI_ISL_521406 |
| VIC665  | EPI_ISL_426961 |
| VIC6650 | EPI_ISL_521407 |
| VIC6651 | EPI_ISL_521408 |
| VIC6652 | EPI_ISL_521409 |
| VIC6653 | EPI_ISL_521410 |
| VIC6654 | EPI_ISL_521411 |
| VIC6656 | EPI_ISL_521412 |
| VIC6658 | EPI_ISL_521414 |
| VIC6659 | EPI_ISL_521415 |
| VIC666  | EPI_ISL_426962 |
| VIC6660 | EPI_ISL_521416 |
| VIC6662 | EPI_ISL_521418 |
| VIC6663 | EPI_ISL_521419 |
| VIC6664 | EPI_ISL_521420 |
| VIC6665 | EPI_ISL_521421 |
| VIC6666 | EPI_ISL_521422 |
| VIC6667 | EPI_ISL_521423 |
| VIC6668 | EPI_ISL_521424 |
| VIC6669 | EPI_ISL_521425 |
| VIC667  | EPI_ISL_426963 |
| VIC6670 | EPI_ISL_521426 |
| VIC6671 | EPI_ISL_521427 |
| VIC6672 | EPI_ISL_521428 |
| VIC6673 | EPI_ISL_521429 |
| VIC6674 | EPI_ISL_521430 |
| VIC6675 | EPI_ISL_521431 |
| VIC6676 | EPI_ISL_521432 |
| VIC6677 | EPI_ISL_521433 |
| VIC6678 | EPI_ISL_521434 |
| VIC6679 | EPI_ISL_521435 |
| VIC668  | EPI_ISL_426964 |

|         |                |
|---------|----------------|
| VIC6680 | EPI_ISL_521436 |
| VIC6682 | EPI_ISL_521438 |
| VIC6684 | EPI_ISL_521440 |
| VIC6685 | EPI_ISL_521441 |
| VIC6686 | EPI_ISL_521442 |
| VIC6687 | EPI_ISL_521443 |
| VIC6688 | EPI_ISL_521444 |
| VIC6689 | EPI_ISL_521445 |
| VIC6691 | EPI_ISL_521447 |
| VIC6692 | EPI_ISL_521448 |
| VIC6693 | EPI_ISL_521449 |
| VIC6696 | EPI_ISL_563998 |
| VIC6697 | EPI_ISL_563999 |
| VIC6698 | EPI_ISL_564000 |
| VIC67   | EPI_ISL_419781 |
| VIC670  | EPI_ISL_426966 |
| VIC6700 | EPI_ISL_561458 |
| VIC6701 | EPI_ISL_564001 |
| VIC6702 | EPI_ISL_561453 |
| VIC6703 | EPI_ISL_562067 |
| VIC6709 | EPI_ISL_562754 |
| VIC671  | EPI_ISL_426967 |
| VIC6710 | EPI_ISL_564003 |
| VIC6713 | EPI_ISL_564004 |
| VIC6714 | EPI_ISL_564005 |
| VIC6716 | EPI_ISL_564007 |
| VIC6717 | EPI_ISL_564008 |
| VIC6718 | EPI_ISL_564009 |
| VIC6719 | EPI_ISL_564010 |
| VIC672  | EPI_ISL_426968 |
| VIC6720 | EPI_ISL_564011 |
| VIC6721 | EPI_ISL_564012 |
| VIC6722 | EPI_ISL_564013 |
| VIC6723 | EPI_ISL_561986 |
| VIC6724 | EPI_ISL_561508 |
| VIC6725 | EPI_ISL_564014 |
| VIC6726 | EPI_ISL_564015 |
| VIC6727 | EPI_ISL_564016 |
| VIC6728 | EPI_ISL_562048 |
| VIC673  | EPI_ISL_426969 |
| VIC6730 | EPI_ISL_564017 |
| VIC6731 | EPI_ISL_564018 |
| VIC6732 | EPI_ISL_561858 |
| VIC6734 | EPI_ISL_564019 |
| VIC6735 | EPI_ISL_564020 |
| VIC6739 | EPI_ISL_564021 |
| VIC674  | EPI_ISL_426970 |
| VIC6740 | EPI_ISL_564022 |
| VIC6742 | EPI_ISL_564023 |
| VIC6744 | EPI_ISL_564024 |
| VIC6746 | EPI_ISL_564025 |
| VIC6747 | EPI_ISL_564026 |

|         |                |
|---------|----------------|
| VIC6748 | EPI_ISL_564027 |
| VIC6749 | EPI_ISL_564028 |
| VIC6750 | EPI_ISL_561816 |
| VIC6751 | EPI_ISL_564029 |
| VIC6753 | EPI_ISL_564030 |
| VIC6754 | EPI_ISL_562164 |
| VIC6755 | EPI_ISL_564031 |
| VIC6756 | EPI_ISL_564032 |
| VIC6757 | EPI_ISL_564033 |
| VIC6758 | EPI_ISL_564034 |
| VIC6759 | EPI_ISL_564035 |
| VIC676  | EPI_ISL_426971 |
| VIC6760 | EPI_ISL_564036 |
| VIC6761 | EPI_ISL_564037 |
| VIC6762 | EPI_ISL_564038 |
| VIC6763 | EPI_ISL_564039 |
| VIC6764 | EPI_ISL_564040 |
| VIC6765 | EPI_ISL_564041 |
| VIC6766 | EPI_ISL_562085 |
| VIC6767 | EPI_ISL_564042 |
| VIC6768 | EPI_ISL_564043 |
| VIC6769 | EPI_ISL_562076 |
| VIC677  | EPI_ISL_426972 |
| VIC6770 | EPI_ISL_564044 |
| VIC6772 | EPI_ISL_564045 |
| VIC6773 | EPI_ISL_564046 |
| VIC6775 | EPI_ISL_564048 |
| VIC6776 | EPI_ISL_564049 |
| VIC6777 | Rejected       |
| VIC6779 | EPI_ISL_564050 |
| VIC678  | EPI_ISL_426973 |
| VIC6781 | EPI_ISL_564051 |
| VIC6782 | EPI_ISL_564052 |
| VIC6783 | Rejected       |
| VIC6784 | EPI_ISL_564053 |
| VIC6786 | EPI_ISL_564054 |
| VIC6788 | EPI_ISL_564055 |
| VIC679  | EPI_ISL_426974 |
| VIC6790 | EPI_ISL_564057 |
| VIC6791 | EPI_ISL_561765 |
| VIC6792 | EPI_ISL_564058 |
| VIC6793 | EPI_ISL_564059 |
| VIC6794 | EPI_ISL_564060 |
| VIC6795 | EPI_ISL_564061 |
| VIC6796 | EPI_ISL_564062 |
| VIC6797 | EPI_ISL_564063 |
| VIC6799 | EPI_ISL_564064 |
| VIC68   | EPI_ISL_419782 |
| VIC680  | EPI_ISL_426975 |
| VIC6800 | EPI_ISL_564065 |
| VIC6801 | EPI_ISL_564066 |
| VIC6804 | EPI_ISL_564067 |

|         |                |
|---------|----------------|
| VIC6806 | EPI_ISL_564068 |
| VIC6807 | EPI_ISL_564069 |
| VIC6809 | EPI_ISL_564070 |
| VIC681  | EPI_ISL_426976 |
| VIC6812 | EPI_ISL_564071 |
| VIC6816 | EPI_ISL_564074 |
| VIC6817 | EPI_ISL_564075 |
| VIC6818 | EPI_ISL_564076 |
| VIC682  | EPI_ISL_426977 |
| VIC6824 | EPI_ISL_564077 |
| VIC6825 | EPI_ISL_564078 |
| VIC6826 | EPI_ISL_564079 |
| VIC6827 | EPI_ISL_564080 |
| VIC6828 | EPI_ISL_562152 |
| VIC6829 | EPI_ISL_564081 |
| VIC683  | EPI_ISL_426978 |
| VIC6830 | EPI_ISL_564082 |
| VIC6831 | EPI_ISL_564083 |
| VIC6832 | EPI_ISL_564084 |
| VIC6833 | EPI_ISL_564085 |
| VIC6834 | EPI_ISL_564086 |
| VIC6836 | EPI_ISL_564088 |
| VIC6838 | EPI_ISL_564089 |
| VIC6839 | EPI_ISL_564090 |
| VIC6840 | EPI_ISL_561582 |
| VIC6841 | EPI_ISL_561403 |
| VIC6843 | EPI_ISL_562016 |
| VIC6844 | EPI_ISL_564091 |
| VIC6845 | EPI_ISL_564092 |
| VIC6846 | EPI_ISL_564093 |
| VIC6847 | EPI_ISL_564094 |
| VIC685  | EPI_ISL_426980 |
| VIC6850 | EPI_ISL_564095 |
| VIC6851 | EPI_ISL_564096 |
| VIC6852 | EPI_ISL_561514 |
| VIC6853 | EPI_ISL_564097 |
| VIC6854 | EPI_ISL_564098 |
| VIC6856 | EPI_ISL_564099 |
| VIC6857 | EPI_ISL_564100 |
| VIC6858 | EPI_ISL_562057 |
| VIC6859 | EPI_ISL_564101 |
| VIC6865 | EPI_ISL_564103 |
| VIC6866 | EPI_ISL_564104 |
| VIC6867 | EPI_ISL_564105 |
| VIC6868 | EPI_ISL_564106 |
| VIC6869 | EPI_ISL_564107 |
| VIC687  | EPI_ISL_426981 |
| VIC6871 | EPI_ISL_564108 |
| VIC6873 | EPI_ISL_561657 |
| VIC6874 | EPI_ISL_561544 |
| VIC6875 | EPI_ISL_564109 |
| VIC6876 | EPI_ISL_564110 |

|         |                |
|---------|----------------|
| VIC6877 | EPI_ISL_561724 |
| VIC6878 | EPI_ISL_564111 |
| VIC6879 | EPI_ISL_564112 |
| VIC688  | Rejected       |
| VIC6881 | EPI_ISL_564113 |
| VIC6882 | EPI_ISL_564114 |
| VIC6883 | EPI_ISL_564115 |
| VIC6885 | EPI_ISL_562704 |
| VIC6886 | EPI_ISL_564116 |
| VIC6888 | EPI_ISL_561851 |
| VIC6890 | EPI_ISL_564117 |
| VIC6891 | EPI_ISL_564118 |
| VIC6894 | EPI_ISL_564120 |
| VIC6895 | EPI_ISL_564121 |
| VIC6896 | EPI_ISL_561423 |
| VIC6897 | EPI_ISL_564122 |
| VIC6898 | EPI_ISL_564123 |
| VIC6899 | EPI_ISL_564124 |
| VIC69   | EPI_ISL_419783 |
| VIC6902 | EPI_ISL_564126 |
| VIC6903 | EPI_ISL_564127 |
| VIC6904 | EPI_ISL_564128 |
| VIC6905 | EPI_ISL_564129 |
| VIC6907 | EPI_ISL_562049 |
| VIC6908 | EPI_ISL_564130 |
| VIC6909 | EPI_ISL_564131 |
| VIC6911 | EPI_ISL_564132 |
| VIC6912 | EPI_ISL_564133 |
| VIC6913 | EPI_ISL_564134 |
| VIC6914 | EPI_ISL_564135 |
| VIC6915 | EPI_ISL_564136 |
| VIC6916 | EPI_ISL_562113 |
| VIC6917 | EPI_ISL_564137 |
| VIC6918 | EPI_ISL_564138 |
| VIC6919 | EPI_ISL_564139 |
| VIC6920 | EPI_ISL_564140 |
| VIC6921 | EPI_ISL_564141 |
| VIC6922 | EPI_ISL_564142 |
| VIC6923 | EPI_ISL_564143 |
| VIC6924 | EPI_ISL_564144 |
| VIC6925 | EPI_ISL_564145 |
| VIC6927 | EPI_ISL_564146 |
| VIC6928 | EPI_ISL_564147 |
| VIC6929 | EPI_ISL_564148 |
| VIC693  | EPI_ISL_426985 |
| VIC6932 | EPI_ISL_564149 |
| VIC6933 | EPI_ISL_564150 |
| VIC6934 | EPI_ISL_564151 |
| VIC6935 | EPI_ISL_564152 |
| VIC6937 | EPI_ISL_564154 |
| VIC6938 | EPI_ISL_564155 |
| VIC6939 | EPI_ISL_564156 |



|         |                |
|---------|----------------|
| VIC694  | EPI_ISL_426986 |
| VIC6941 | EPI_ISL_564157 |
| VIC6942 | EPI_ISL_564158 |
| VIC6944 | EPI_ISL_562050 |
| VIC6945 | EPI_ISL_564159 |
| VIC6946 | EPI_ISL_561569 |
| VIC6947 | EPI_ISL_564160 |
| VIC6949 | EPI_ISL_561774 |
| VIC695  | EPI_ISL_426987 |
| VIC6950 | EPI_ISL_564161 |
| VIC6951 | EPI_ISL_562156 |
| VIC6952 | EPI_ISL_564162 |
| VIC6956 | EPI_ISL_561780 |
| VIC6957 | EPI_ISL_561943 |
| VIC696  | EPI_ISL_426988 |
| VIC6960 | EPI_ISL_564163 |
| VIC6964 | EPI_ISL_564164 |
| VIC6965 | EPI_ISL_561507 |
| VIC6966 | EPI_ISL_564165 |
| VIC6967 | EPI_ISL_564166 |
| VIC6968 | EPI_ISL_564167 |
| VIC6969 | EPI_ISL_564168 |
| VIC697  | EPI_ISL_426989 |
| VIC6972 | EPI_ISL_564169 |
| VIC6973 | EPI_ISL_564170 |
| VIC6974 | EPI_ISL_564171 |
| VIC6975 | EPI_ISL_564172 |
| VIC6976 | EPI_ISL_564173 |
| VIC6977 | EPI_ISL_564174 |
| VIC6978 | EPI_ISL_564175 |
| VIC6979 | EPI_ISL_564176 |
| VIC6980 | EPI_ISL_564177 |
| VIC6982 | EPI_ISL_564178 |
| VIC6983 | EPI_ISL_564179 |
| VIC6984 | EPI_ISL_564180 |
| VIC6985 | EPI_ISL_564181 |
| VIC6987 | EPI_ISL_564182 |
| VIC6990 | EPI_ISL_564184 |
| VIC6991 | EPI_ISL_564185 |
| VIC6992 | EPI_ISL_564186 |
| VIC6993 | EPI_ISL_564187 |
| VIC6994 | EPI_ISL_564188 |
| VIC6996 | EPI_ISL_564189 |
| VIC6998 | EPI_ISL_564190 |
| VIC6999 | EPI_ISL_564191 |
| VIC70   | EPI_ISL_419786 |
| VIC7000 | EPI_ISL_564192 |
| VIC7001 | EPI_ISL_564193 |
| VIC7005 | EPI_ISL_564194 |
| VIC7006 | EPI_ISL_564195 |
| VIC7008 | EPI_ISL_564196 |
| VIC7009 | EPI_ISL_561565 |

|         |                |
|---------|----------------|
| VIC701  | EPI_ISL_426878 |
| VIC7012 | EPI_ISL_564197 |
| VIC7013 | EPI_ISL_561707 |
| VIC7014 | EPI_ISL_562023 |
| VIC7018 | EPI_ISL_564198 |
| VIC7026 | EPI_ISL_564199 |
| VIC7027 | EPI_ISL_564200 |
| VIC7036 | EPI_ISL_564203 |
| VIC7038 | EPI_ISL_561863 |
| VIC7039 | EPI_ISL_561491 |
| VIC7040 | EPI_ISL_564204 |
| VIC7041 | EPI_ISL_564205 |
| VIC7044 | EPI_ISL_564206 |
| VIC7046 | EPI_ISL_564207 |
| VIC7047 | EPI_ISL_564208 |
| VIC7049 | EPI_ISL_562109 |
| VIC705  | EPI_ISL_426992 |
| VIC7050 | EPI_ISL_564209 |
| VIC7051 | EPI_ISL_562157 |
| VIC7052 | EPI_ISL_562033 |
| VIC7053 | EPI_ISL_564210 |
| VIC7055 | EPI_ISL_564212 |
| VIC706  | EPI_ISL_426993 |
| VIC7062 | EPI_ISL_561425 |
| VIC7066 | EPI_ISL_564213 |
| VIC7067 | EPI_ISL_564214 |
| VIC707  | EPI_ISL_426994 |
| VIC7072 | EPI_ISL_564215 |
| VIC7073 | EPI_ISL_564216 |
| VIC7074 | EPI_ISL_564217 |
| VIC7079 | EPI_ISL_564218 |
| VIC708  | EPI_ISL_426995 |
| VIC7080 | EPI_ISL_564219 |
| VIC7081 | EPI_ISL_564220 |
| VIC7082 | EPI_ISL_564221 |
| VIC7084 | EPI_ISL_564222 |
| VIC7088 | EPI_ISL_561590 |
| VIC7089 | EPI_ISL_564223 |
| VIC7090 | EPI_ISL_564224 |
| VIC7091 | EPI_ISL_564225 |
| VIC7092 | EPI_ISL_564226 |
| VIC7093 | EPI_ISL_561653 |
| VIC7095 | EPI_ISL_564227 |
| VIC7096 | EPI_ISL_561591 |
| VIC7097 | EPI_ISL_564228 |
| VIC7098 | EPI_ISL_564229 |
| VIC7099 | EPI_ISL_564230 |
| VIC710  | EPI_ISL_426997 |
| VIC7100 | EPI_ISL_564231 |
| VIC7101 | EPI_ISL_564232 |
| VIC7103 | EPI_ISL_564233 |
| VIC7105 | EPI_ISL_564234 |

|         |                |
|---------|----------------|
| VIC7106 | EPI_ISL_564235 |
| VIC7108 | EPI_ISL_564236 |
| VIC7111 | EPI_ISL_564237 |
| VIC7112 | EPI_ISL_561426 |
| VIC7113 | EPI_ISL_564238 |
| VIC7114 | EPI_ISL_564239 |
| VIC7115 | EPI_ISL_564240 |
| VIC7116 | EPI_ISL_564241 |
| VIC7117 | EPI_ISL_564242 |
| VIC7118 | EPI_ISL_564243 |
| VIC7119 | EPI_ISL_561673 |
| VIC712  | EPI_ISL_426999 |
| VIC7124 | EPI_ISL_564244 |
| VIC7125 | EPI_ISL_564245 |
| VIC7126 | EPI_ISL_564246 |
| VIC7128 | EPI_ISL_564247 |
| VIC7129 | EPI_ISL_564248 |
| VIC713  | EPI_ISL_427000 |
| VIC7132 | EPI_ISL_564249 |
| VIC7134 | EPI_ISL_562110 |
| VIC7135 | EPI_ISL_564250 |
| VIC7136 | EPI_ISL_564251 |
| VIC7137 | EPI_ISL_561711 |
| VIC7144 | EPI_ISL_562011 |
| VIC7147 | EPI_ISL_564254 |
| VIC7149 | EPI_ISL_562138 |
| VIC715  | Rejected       |
| VIC7158 | EPI_ISL_564255 |
| VIC7159 | EPI_ISL_561516 |
| VIC716  | EPI_ISL_427001 |
| VIC7162 | EPI_ISL_564256 |
| VIC7163 | EPI_ISL_564257 |
| VIC7164 | EPI_ISL_564258 |
| VIC7165 | EPI_ISL_564259 |
| VIC7167 | EPI_ISL_562051 |
| VIC7170 | EPI_ISL_564260 |
| VIC7172 | EPI_ISL_561554 |
| VIC7173 | EPI_ISL_564261 |
| VIC7175 | EPI_ISL_564262 |
| VIC7176 | EPI_ISL_564263 |
| VIC7177 | EPI_ISL_564264 |
| VIC7178 | EPI_ISL_564265 |
| VIC7179 | EPI_ISL_564266 |
| VIC718  | EPI_ISL_427002 |
| VIC7181 | EPI_ISL_564267 |
| VIC7183 | EPI_ISL_561845 |
| VIC7185 | EPI_ISL_564268 |
| VIC7186 | EPI_ISL_561919 |
| VIC7188 | EPI_ISL_561763 |
| VIC7190 | EPI_ISL_564271 |
| VIC7191 | EPI_ISL_564272 |
| VIC7192 | EPI_ISL_564273 |

|         |                |
|---------|----------------|
| VIC7193 | EPI_ISL_564274 |
| VIC7194 | EPI_ISL_562757 |
| VIC7195 | EPI_ISL_564275 |
| VIC7196 | EPI_ISL_564276 |
| VIC7199 | EPI_ISL_564277 |
| VIC720  | EPI_ISL_427003 |
| VIC7201 | EPI_ISL_564278 |
| VIC7202 | EPI_ISL_564279 |
| VIC7203 | EPI_ISL_564280 |
| VIC7204 | EPI_ISL_561692 |
| VIC7205 | EPI_ISL_561748 |
| VIC7206 | EPI_ISL_564281 |
| VIC7207 | EPI_ISL_564282 |
| VIC7208 | EPI_ISL_564283 |
| VIC7209 | EPI_ISL_564284 |
| VIC7210 | EPI_ISL_564285 |
| VIC7211 | EPI_ISL_561543 |
| VIC7212 | EPI_ISL_564286 |
| VIC7214 | EPI_ISL_564287 |
| VIC7215 | EPI_ISL_564288 |
| VIC7216 | EPI_ISL_564289 |
| VIC7218 | EPI_ISL_562035 |
| VIC7219 | EPI_ISL_564290 |
| VIC7220 | EPI_ISL_564291 |
| VIC7221 | EPI_ISL_564292 |
| VIC7222 | EPI_ISL_561749 |
| VIC7223 | EPI_ISL_564293 |
| VIC7224 | EPI_ISL_561876 |
| VIC7226 | EPI_ISL_564294 |
| VIC7227 | EPI_ISL_564295 |
| VIC7229 | EPI_ISL_564296 |
| VIC7230 | EPI_ISL_564297 |
| VIC7232 | EPI_ISL_564299 |
| VIC7233 | EPI_ISL_564300 |
| VIC7234 | EPI_ISL_564301 |
| VIC7235 | EPI_ISL_564302 |
| VIC7236 | EPI_ISL_564303 |
| VIC7237 | EPI_ISL_564304 |
| VIC7238 | EPI_ISL_564305 |
| VIC7239 | EPI_ISL_564306 |
| VIC7241 | EPI_ISL_564307 |
| VIC7242 | EPI_ISL_564308 |
| VIC7243 | EPI_ISL_564309 |
| VIC7244 | EPI_ISL_564310 |
| VIC7245 | EPI_ISL_561512 |
| VIC7248 | EPI_ISL_564311 |
| VIC7249 | EPI_ISL_564312 |
| VIC7250 | EPI_ISL_564313 |
| VIC7251 | EPI_ISL_564314 |
| VIC7252 | EPI_ISL_564315 |
| VIC7253 | EPI_ISL_564316 |
| VIC7254 | EPI_ISL_564317 |

|         |                |
|---------|----------------|
| VIC7260 | EPI_ISL_564319 |
| VIC7262 | EPI_ISL_561629 |
| VIC7263 | EPI_ISL_564320 |
| VIC7264 | EPI_ISL_564321 |
| VIC7268 | EPI_ISL_564322 |
| VIC727  | EPI_ISL_427007 |
| VIC7271 | EPI_ISL_564323 |
| VIC7272 | EPI_ISL_564324 |
| VIC7273 | EPI_ISL_561803 |
| VIC7274 | EPI_ISL_562012 |
| VIC7275 | EPI_ISL_564325 |
| VIC7277 | EPI_ISL_564327 |
| VIC7284 | EPI_ISL_564328 |
| VIC7286 | EPI_ISL_564329 |
| VIC7291 | EPI_ISL_561533 |
| VIC7293 | EPI_ISL_564330 |
| VIC7294 | EPI_ISL_564331 |
| VIC7299 | EPI_ISL_564332 |
| VIC73   | EPI_ISL_419785 |
| VIC730  | EPI_ISL_427009 |
| VIC7302 | EPI_ISL_564333 |
| VIC7303 | EPI_ISL_564334 |
| VIC7304 | EPI_ISL_561686 |
| VIC7305 | EPI_ISL_564335 |
| VIC7306 | EPI_ISL_564336 |
| VIC7308 | EPI_ISL_564337 |
| VIC7309 | EPI_ISL_564338 |
| VIC731  | EPI_ISL_427010 |
| VIC7310 | EPI_ISL_561414 |
| VIC7311 | EPI_ISL_564339 |
| VIC7313 | EPI_ISL_562658 |
| VIC7316 | EPI_ISL_564340 |
| VIC7317 | EPI_ISL_564341 |
| VIC7319 | EPI_ISL_561697 |
| VIC732  | EPI_ISL_427011 |
| VIC7323 | EPI_ISL_564342 |
| VIC7325 | EPI_ISL_564343 |
| VIC7327 | EPI_ISL_564344 |
| VIC7328 | EPI_ISL_564345 |
| VIC733  | EPI_ISL_427012 |
| VIC7334 | EPI_ISL_564346 |
| VIC7339 | EPI_ISL_564348 |
| VIC734  | EPI_ISL_427013 |
| VIC7343 | EPI_ISL_564349 |
| VIC7344 | EPI_ISL_564350 |
| VIC7345 | EPI_ISL_564351 |
| VIC7349 | EPI_ISL_564353 |
| VIC735  | EPI_ISL_427014 |
| VIC7350 | EPI_ISL_564354 |
| VIC7351 | EPI_ISL_564355 |
| VIC7352 | EPI_ISL_564356 |
| VIC736  | EPI_ISL_427015 |

|         |                |
|---------|----------------|
| VIC7360 | EPI_ISL_564358 |
| VIC7362 | EPI_ISL_564359 |
| VIC7363 | EPI_ISL_564360 |
| VIC7364 | EPI_ISL_564361 |
| VIC7365 | EPI_ISL_564362 |
| VIC7366 | EPI_ISL_561778 |
| VIC7367 | EPI_ISL_564363 |
| VIC7368 | EPI_ISL_564364 |
| VIC737  | EPI_ISL_427016 |
| VIC7372 | EPI_ISL_564365 |
| VIC7373 | EPI_ISL_564366 |
| VIC7374 | EPI_ISL_564367 |
| VIC7375 | EPI_ISL_561586 |
| VIC7378 | EPI_ISL_564368 |
| VIC738  | EPI_ISL_427017 |
| VIC7380 | EPI_ISL_564369 |
| VIC7381 | EPI_ISL_564370 |
| VIC7382 | EPI_ISL_564371 |
| VIC7383 | EPI_ISL_564372 |
| VIC7385 | EPI_ISL_561752 |
| VIC7386 | EPI_ISL_564373 |
| VIC7388 | EPI_ISL_564374 |
| VIC7389 | EPI_ISL_564375 |
| VIC739  | EPI_ISL_427018 |
| VIC7390 | EPI_ISL_564376 |
| VIC7391 | EPI_ISL_564377 |
| VIC7392 | EPI_ISL_564378 |
| VIC7393 | EPI_ISL_564379 |
| VIC7394 | EPI_ISL_564380 |
| VIC7395 | EPI_ISL_561559 |
| VIC7396 | EPI_ISL_564381 |
| VIC7398 | EPI_ISL_564382 |
| VIC7399 | EPI_ISL_564383 |
| VIC740  | Rejected       |
| VIC7400 | EPI_ISL_564384 |
| VIC7401 | Rejected       |
| VIC7403 | EPI_ISL_564385 |
| VIC7404 | EPI_ISL_564386 |
| VIC7405 | EPI_ISL_564387 |
| VIC7406 | EPI_ISL_564388 |
| VIC7407 | EPI_ISL_561852 |
| VIC7409 | EPI_ISL_564389 |
| VIC741  | EPI_ISL_427019 |
| VIC7410 | EPI_ISL_561715 |
| VIC7411 | EPI_ISL_564390 |
| VIC7414 | EPI_ISL_564391 |
| VIC7415 | EPI_ISL_564392 |
| VIC7416 | EPI_ISL_564393 |
| VIC7418 | EPI_ISL_564395 |
| VIC7419 | EPI_ISL_564396 |
| VIC742  | EPI_ISL_427020 |
| VIC7420 | EPI_ISL_564397 |

|         |                 |
|---------|-----------------|
| VIC7421 | EPI_ISL_564398  |
| VIC7423 | EPI_ISL_564399  |
| VIC7424 | EPI_ISL_564400  |
| VIC7425 | EPI_ISL_564401  |
| VIC7426 | EPI_ISL_564402  |
| VIC7427 | EPI_ISL_564403  |
| VIC7428 | EPI_ISL_564404  |
| VIC7429 | EPI_ISL_564405  |
| VIC7430 | EPI_ISL_564406  |
| VIC7431 | EPI_ISL_564407  |
| VIC7432 | EPI_ISL_564408  |
| VIC7433 | EPI_ISL_564409  |
| VIC7434 | EPI_ISL_564410  |
| VIC7435 | EPI_ISL_564411  |
| VIC7436 | EPI_ISL_564412  |
| VIC7438 | EPI_ISL_564413  |
| VIC7439 | EPI_ISL_564414  |
| VIC744  | EPI_ISL_427022  |
| VIC7441 | EPI_ISL_564415  |
| VIC7442 | EPI_ISL_564416  |
| VIC7443 | EPI_ISL_564417  |
| VIC7444 | EPI_ISL_564418  |
| VIC7446 | EPI_ISL_561708  |
| VIC7447 | EPI_ISL_1055321 |
| VIC7448 | EPI_ISL_564420  |
| VIC7449 | EPI_ISL_564421  |
| VIC745  | EPI_ISL_427023  |
| VIC7450 | EPI_ISL_564422  |
| VIC7451 | EPI_ISL_561930  |
| VIC7452 | EPI_ISL_564423  |
| VIC7453 | EPI_ISL_564424  |
| VIC7454 | EPI_ISL_564425  |
| VIC7455 | EPI_ISL_564426  |
| VIC7457 | EPI_ISL_564428  |
| VIC7459 | EPI_ISL_564429  |
| VIC7460 | EPI_ISL_561842  |
| VIC7462 | EPI_ISL_562046  |
| VIC7464 | EPI_ISL_561734  |
| VIC7466 | EPI_ISL_561683  |
| VIC7467 | EPI_ISL_564430  |
| VIC747  | EPI_ISL_427025  |
| VIC7470 | EPI_ISL_561684  |
| VIC7471 | EPI_ISL_564431  |
| VIC7472 | EPI_ISL_564432  |
| VIC7473 | EPI_ISL_564433  |
| VIC7474 | EPI_ISL_561678  |
| VIC7475 | EPI_ISL_564434  |
| VIC7476 | EPI_ISL_564435  |
| VIC7477 | EPI_ISL_564436  |
| VIC7478 | EPI_ISL_564437  |
| VIC7479 | EPI_ISL_561671  |
| VIC748  | EPI_ISL_427026  |

|         |                 |
|---------|-----------------|
| VIC7480 | EPI_ISL_561755  |
| VIC7481 | EPI_ISL_564438  |
| VIC7482 | EPI_ISL_564439  |
| VIC7484 | EPI_ISL_564440  |
| VIC7485 | EPI_ISL_564441  |
| VIC7486 | EPI_ISL_564442  |
| VIC7488 | EPI_ISL_561725  |
| VIC7489 | EPI_ISL_564443  |
| VIC7491 | EPI_ISL_564444  |
| VIC7492 | EPI_ISL_564445  |
| VIC7493 | EPI_ISL_564446  |
| VIC7494 | EPI_ISL_564447  |
| VIC7495 | EPI_ISL_564448  |
| VIC7496 | EPI_ISL_564449  |
| VIC7497 | EPI_ISL_564450  |
| VIC7498 | EPI_ISL_1055322 |
| VIC7499 | EPI_ISL_564451  |
| VIC75   | EPI_ISL_419787  |
| VIC7501 | EPI_ISL_561867  |
| VIC7502 | EPI_ISL_564452  |
| VIC7504 | EPI_ISL_564453  |
| VIC7505 | EPI_ISL_564454  |
| VIC7506 | EPI_ISL_564455  |
| VIC7507 | EPI_ISL_561910  |
| VIC7508 | EPI_ISL_564456  |
| VIC7509 | EPI_ISL_564457  |
| VIC751  | EPI_ISL_427028  |
| VIC7512 | EPI_ISL_564459  |
| VIC7513 | EPI_ISL_564460  |
| VIC7514 | EPI_ISL_564461  |
| VIC7517 | EPI_ISL_564463  |
| VIC7518 | EPI_ISL_564464  |
| VIC752  | EPI_ISL_427029  |
| VIC7520 | EPI_ISL_564466  |
| VIC7521 | EPI_ISL_564467  |
| VIC7522 | EPI_ISL_564468  |
| VIC7523 | EPI_ISL_564469  |
| VIC7525 | EPI_ISL_564470  |
| VIC7526 | EPI_ISL_561800  |
| VIC7527 | EPI_ISL_564471  |
| VIC7528 | EPI_ISL_564472  |
| VIC7529 | EPI_ISL_564473  |
| VIC753  | EPI_ISL_427030  |
| VIC7530 | EPI_ISL_564474  |
| VIC7531 | EPI_ISL_564475  |
| VIC7532 | EPI_ISL_564476  |
| VIC7533 | EPI_ISL_564477  |
| VIC7534 | EPI_ISL_564478  |
| VIC7535 | EPI_ISL_564479  |
| VIC7536 | EPI_ISL_564480  |
| VIC7537 | EPI_ISL_564481  |
| VIC7538 | EPI_ISL_564482  |



|         |                 |
|---------|-----------------|
| VIC7539 | EPI_ISL_564483  |
| VIC754  | EPI_ISL_427031  |
| VIC7540 | EPI_ISL_564484  |
| VIC7542 | EPI_ISL_564485  |
| VIC7543 | EPI_ISL_564486  |
| VIC7544 | EPI_ISL_564487  |
| VIC7545 | EPI_ISL_564488  |
| VIC7546 | EPI_ISL_564489  |
| VIC7547 | EPI_ISL_564490  |
| VIC7548 | EPI_ISL_564491  |
| VIC7550 | EPI_ISL_564492  |
| VIC7551 | EPI_ISL_564493  |
| VIC7552 | EPI_ISL_561688  |
| VIC7553 | EPI_ISL_564494  |
| VIC7554 | EPI_ISL_1055323 |
| VIC7555 | EPI_ISL_564495  |
| VIC7556 | EPI_ISL_564496  |
| VIC7558 | EPI_ISL_564497  |
| VIC7560 | EPI_ISL_564498  |
| VIC7561 | EPI_ISL_564499  |
| VIC7562 | EPI_ISL_564500  |
| VIC7563 | EPI_ISL_564501  |
| VIC7565 | EPI_ISL_564502  |
| VIC7567 | EPI_ISL_564503  |
| VIC7568 | EPI_ISL_561790  |
| VIC757  | EPI_ISL_427034  |
| VIC7570 | EPI_ISL_564505  |
| VIC7571 | EPI_ISL_564506  |
| VIC7572 | EPI_ISL_561758  |
| VIC7573 | EPI_ISL_564507  |
| VIC7575 | EPI_ISL_561891  |
| VIC7576 | EPI_ISL_564508  |
| VIC7578 | EPI_ISL_564509  |
| VIC7579 | EPI_ISL_562068  |
| VIC7581 | EPI_ISL_564511  |
| VIC7582 | EPI_ISL_564512  |
| VIC7583 | EPI_ISL_564513  |
| VIC7586 | EPI_ISL_564514  |
| VIC7589 | EPI_ISL_564515  |
| VIC7590 | EPI_ISL_564516  |
| VIC7591 | EPI_ISL_564517  |
| VIC7592 | EPI_ISL_564518  |
| VIC7593 | EPI_ISL_561542  |
| VIC7594 | EPI_ISL_564519  |
| VIC7596 | EPI_ISL_564520  |
| VIC7597 | EPI_ISL_564521  |
| VIC7598 | EPI_ISL_564522  |
| VIC76   | EPI_ISL_419788  |
| VIC760  | EPI_ISL_427036  |
| VIC7600 | EPI_ISL_561551  |
| VIC7603 | EPI_ISL_564523  |
| VIC7604 | EPI_ISL_564524  |

|         |                |
|---------|----------------|
| VIC7606 | EPI_ISL_561846 |
| VIC7608 | EPI_ISL_561513 |
| VIC7609 | EPI_ISL_564525 |
| VIC7610 | EPI_ISL_564526 |
| VIC7611 | EPI_ISL_564527 |
| VIC7612 | EPI_ISL_564528 |
| VIC7613 | EPI_ISL_564529 |
| VIC7614 | EPI_ISL_564530 |
| VIC7615 | EPI_ISL_564531 |
| VIC7616 | EPI_ISL_564532 |
| VIC7617 | EPI_ISL_564533 |
| VIC7618 | EPI_ISL_564534 |
| VIC7619 | EPI_ISL_564535 |
| VIC762  | EPI_ISL_427038 |
| VIC7620 | EPI_ISL_564536 |
| VIC7621 | EPI_ISL_564537 |
| VIC7622 | EPI_ISL_564538 |
| VIC7623 | EPI_ISL_564539 |
| VIC7624 | EPI_ISL_564540 |
| VIC7625 | EPI_ISL_564541 |
| VIC7626 | EPI_ISL_562132 |
| VIC7627 | EPI_ISL_564542 |
| VIC7628 | EPI_ISL_564543 |
| VIC7639 | EPI_ISL_564544 |
| VIC764  | EPI_ISL_427040 |
| VIC7640 | EPI_ISL_564545 |
| VIC7642 | EPI_ISL_562069 |
| VIC765  | EPI_ISL_427041 |
| VIC7650 | EPI_ISL_564551 |
| VIC7656 | EPI_ISL_564556 |
| VIC7657 | EPI_ISL_564557 |
| VIC7658 | EPI_ISL_564558 |
| VIC7659 | EPI_ISL_564559 |
| VIC766  | EPI_ISL_427042 |
| VIC7660 | EPI_ISL_564560 |
| VIC7661 | EPI_ISL_562659 |
| VIC7662 | EPI_ISL_564561 |
| VIC7666 | EPI_ISL_564563 |
| VIC7669 | Rejected       |
| VIC767  | EPI_ISL_427044 |
| VIC7670 | EPI_ISL_564565 |
| VIC7671 | EPI_ISL_564566 |
| VIC7672 | EPI_ISL_564567 |
| VIC7675 | EPI_ISL_564568 |
| VIC7676 | EPI_ISL_564569 |
| VIC7677 | EPI_ISL_564570 |
| VIC7678 | EPI_ISL_564571 |
| VIC7679 | EPI_ISL_562091 |
| VIC768  | EPI_ISL_427045 |
| VIC7681 | EPI_ISL_564572 |
| VIC7682 | Rejected       |
| VIC7683 | EPI_ISL_564573 |

|         |                 |
|---------|-----------------|
| VIC7684 | EPI_ISL_564574  |
| VIC7685 | EPI_ISL_564575  |
| VIC7686 | EPI_ISL_564576  |
| VIC7687 | EPI_ISL_564577  |
| VIC7688 | EPI_ISL_564578  |
| VIC7689 | Rejected        |
| VIC769  | EPI_ISL_427046  |
| VIC7690 | EPI_ISL_564579  |
| VIC7691 | EPI_ISL_564580  |
| VIC7692 | EPI_ISL_564581  |
| VIC7693 | EPI_ISL_564582  |
| VIC7694 | EPI_ISL_564583  |
| VIC7695 | EPI_ISL_564584  |
| VIC7696 | EPI_ISL_564585  |
| VIC7697 | EPI_ISL_564586  |
| VIC7698 | EPI_ISL_564587  |
| VIC7699 | EPI_ISL_564588  |
| VIC77   | EPI_ISL_419789  |
| VIC770  | EPI_ISL_450214  |
| VIC7700 | EPI_ISL_564589  |
| VIC7701 | EPI_ISL_564590  |
| VIC7702 | EPI_ISL_564591  |
| VIC7704 | EPI_ISL_564592  |
| VIC7705 | EPI_ISL_564593  |
| VIC7706 | EPI_ISL_564594  |
| VIC7709 | EPI_ISL_561526  |
| VIC771  | EPI_ISL_427047  |
| VIC7710 | EPI_ISL_564595  |
| VIC7711 | EPI_ISL_564596  |
| VIC7712 | EPI_ISL_564597  |
| VIC7713 | EPI_ISL_564598  |
| VIC7714 | EPI_ISL_1055324 |
| VIC7716 | EPI_ISL_564599  |
| VIC7717 | EPI_ISL_564600  |
| VIC7718 | EPI_ISL_564601  |
| VIC7719 | EPI_ISL_564602  |
| VIC772  | EPI_ISL_427048  |
| VIC7720 | EPI_ISL_564603  |
| VIC7721 | EPI_ISL_564604  |
| VIC7722 | EPI_ISL_564605  |
| VIC7723 | EPI_ISL_564606  |
| VIC7724 | EPI_ISL_564607  |
| VIC7725 | EPI_ISL_564608  |
| VIC7726 | EPI_ISL_564609  |
| VIC7727 | EPI_ISL_564610  |
| VIC7728 | EPI_ISL_564611  |
| VIC773  | EPI_ISL_427049  |
| VIC7730 | EPI_ISL_561949  |
| VIC7731 | EPI_ISL_564613  |
| VIC7732 | EPI_ISL_561560  |
| VIC7733 | EPI_ISL_564614  |
| VIC7734 | EPI_ISL_564615  |

|         |                |
|---------|----------------|
| VIC7735 | EPI_ISL_561818 |
| VIC7736 | EPI_ISL_564616 |
| VIC7737 | EPI_ISL_564617 |
| VIC7738 | EPI_ISL_564618 |
| VIC774  | EPI_ISL_427050 |
| VIC7741 | EPI_ISL_564619 |
| VIC7742 | EPI_ISL_564620 |
| VIC7743 | EPI_ISL_564621 |
| VIC7744 | EPI_ISL_564622 |
| VIC7745 | EPI_ISL_564623 |
| VIC7746 | EPI_ISL_564624 |
| VIC7748 | EPI_ISL_564626 |
| VIC7749 | EPI_ISL_564627 |
| VIC7750 | EPI_ISL_564628 |
| VIC7751 | EPI_ISL_564629 |
| VIC7752 | EPI_ISL_562022 |
| VIC7753 | EPI_ISL_562133 |
| VIC7754 | EPI_ISL_564630 |
| VIC7755 | EPI_ISL_564631 |
| VIC7756 | EPI_ISL_564632 |
| VIC7759 | EPI_ISL_564634 |
| VIC7760 | EPI_ISL_564635 |
| VIC7761 | EPI_ISL_564636 |
| VIC7762 | EPI_ISL_564637 |
| VIC7763 | EPI_ISL_564638 |
| VIC7764 | EPI_ISL_564639 |
| VIC7765 | EPI_ISL_564640 |
| VIC7766 | EPI_ISL_564641 |
| VIC7767 | EPI_ISL_564642 |
| VIC7768 | EPI_ISL_564643 |
| VIC7769 | EPI_ISL_564644 |
| VIC777  | EPI_ISL_427052 |
| VIC7771 | EPI_ISL_562086 |
| VIC7773 | EPI_ISL_564646 |
| VIC7775 | EPI_ISL_564647 |
| VIC7776 | EPI_ISL_564648 |
| VIC7777 | EPI_ISL_564649 |
| VIC7778 | EPI_ISL_564650 |
| VIC7779 | EPI_ISL_561974 |
| VIC778  | EPI_ISL_427053 |
| VIC7780 | EPI_ISL_564651 |
| VIC7781 | EPI_ISL_561540 |
| VIC7782 | EPI_ISL_564652 |
| VIC7783 | EPI_ISL_564653 |
| VIC7785 | EPI_ISL_564655 |
| VIC7786 | EPI_ISL_564656 |
| VIC7787 | EPI_ISL_564657 |
| VIC7788 | EPI_ISL_564658 |
| VIC7789 | EPI_ISL_561823 |
| VIC779  | EPI_ISL_427054 |
| VIC7790 | EPI_ISL_564659 |
| VIC7791 | EPI_ISL_562030 |

|         |                |
|---------|----------------|
| VIC7792 | EPI_ISL_564660 |
| VIC7793 | EPI_ISL_564661 |
| VIC7794 | EPI_ISL_564662 |
| VIC7795 | EPI_ISL_564663 |
| VIC7796 | EPI_ISL_564664 |
| VIC7797 | EPI_ISL_564665 |
| VIC7798 | EPI_ISL_564666 |
| VIC7799 | EPI_ISL_564667 |
| VIC78   | EPI_ISL_419790 |
| VIC780  | EPI_ISL_427055 |
| VIC7803 | EPI_ISL_564668 |
| VIC7804 | EPI_ISL_564669 |
| VIC7805 | EPI_ISL_564670 |
| VIC7807 | Rejected       |
| VIC7808 | EPI_ISL_564671 |
| VIC781  | EPI_ISL_427056 |
| VIC7811 | EPI_ISL_564672 |
| VIC7812 | EPI_ISL_564673 |
| VIC7814 | EPI_ISL_564674 |
| VIC7816 | EPI_ISL_564675 |
| VIC7818 | EPI_ISL_564676 |
| VIC7819 | EPI_ISL_564677 |
| VIC782  | EPI_ISL_427057 |
| VIC7820 | EPI_ISL_564678 |
| VIC7821 | EPI_ISL_564679 |
| VIC7822 | EPI_ISL_561792 |
| VIC7824 | EPI_ISL_564680 |
| VIC7825 | EPI_ISL_562034 |
| VIC7827 | EPI_ISL_564681 |
| VIC7828 | EPI_ISL_564682 |
| VIC7829 | EPI_ISL_564683 |
| VIC783  | EPI_ISL_427058 |
| VIC7830 | EPI_ISL_564684 |
| VIC7832 | EPI_ISL_564685 |
| VIC7833 | EPI_ISL_564686 |
| VIC7834 | EPI_ISL_564687 |
| VIC7835 | EPI_ISL_564688 |
| VIC7836 | EPI_ISL_564689 |
| VIC7839 | EPI_ISL_564690 |
| VIC784  | EPI_ISL_427059 |
| VIC7840 | EPI_ISL_564691 |
| VIC7841 | EPI_ISL_564692 |
| VIC7842 | EPI_ISL_564693 |
| VIC7843 | EPI_ISL_564694 |
| VIC7844 | EPI_ISL_564695 |
| VIC7845 | EPI_ISL_564696 |
| VIC7846 | EPI_ISL_564697 |
| VIC7847 | EPI_ISL_564698 |
| VIC7848 | EPI_ISL_564699 |
| VIC7849 | EPI_ISL_564700 |
| VIC785  | EPI_ISL_427060 |
| VIC7850 | EPI_ISL_564701 |

|         |                 |
|---------|-----------------|
| VIC7851 | EPI_ISL_564702  |
| VIC7852 | EPI_ISL_564703  |
| VIC7853 | EPI_ISL_564704  |
| VIC7854 | EPI_ISL_564705  |
| VIC7855 | EPI_ISL_564706  |
| VIC7856 | EPI_ISL_564707  |
| VIC7857 | EPI_ISL_564708  |
| VIC7859 | EPI_ISL_564709  |
| VIC786  | EPI_ISL_427061  |
| VIC7860 | EPI_ISL_564710  |
| VIC7861 | EPI_ISL_564711  |
| VIC7862 | EPI_ISL_564712  |
| VIC7863 | EPI_ISL_564713  |
| VIC7864 | EPI_ISL_564714  |
| VIC7865 | EPI_ISL_564715  |
| VIC7866 | EPI_ISL_564716  |
| VIC7868 | EPI_ISL_1055325 |
| VIC7869 | EPI_ISL_564717  |
| VIC787  | EPI_ISL_427062  |
| VIC7870 | EPI_ISL_564718  |
| VIC7871 | EPI_ISL_564719  |
| VIC7874 | EPI_ISL_564720  |
| VIC7875 | EPI_ISL_564721  |
| VIC7876 | EPI_ISL_1055326 |
| VIC7877 | EPI_ISL_564722  |
| VIC788  | EPI_ISL_427063  |
| VIC7880 | EPI_ISL_564723  |
| VIC7881 | EPI_ISL_564724  |
| VIC7882 | EPI_ISL_1055327 |
| VIC7883 | EPI_ISL_564725  |
| VIC7884 | EPI_ISL_564726  |
| VIC7885 | EPI_ISL_564727  |
| VIC7886 | EPI_ISL_564728  |
| VIC7887 | EPI_ISL_564729  |
| VIC7889 | EPI_ISL_564730  |
| VIC789  | EPI_ISL_427064  |
| VIC7891 | EPI_ISL_564732  |
| VIC7894 | EPI_ISL_564733  |
| VIC7897 | EPI_ISL_564735  |
| VIC7898 | EPI_ISL_561648  |
| VIC7899 | EPI_ISL_564736  |
| VIC79   | EPI_ISL_419791  |
| VIC790  | EPI_ISL_427065  |
| VIC7900 | EPI_ISL_561990  |
| VIC7903 | EPI_ISL_564737  |
| VIC7905 | EPI_ISL_1055328 |
| VIC7908 | EPI_ISL_564738  |
| VIC791  | EPI_ISL_427066  |
| VIC7910 | EPI_ISL_564739  |
| VIC7911 | EPI_ISL_564740  |
| VIC7912 | EPI_ISL_564741  |
| VIC7915 | Rejected        |

|         |                 |
|---------|-----------------|
| VIC7916 | EPI_ISL_564742  |
| VIC7919 | EPI_ISL_562623  |
| VIC792  | EPI_ISL_427067  |
| VIC7920 | EPI_ISL_564743  |
| VIC7921 | EPI_ISL_564744  |
| VIC7923 | EPI_ISL_564745  |
| VIC7924 | EPI_ISL_564746  |
| VIC7926 | EPI_ISL_564748  |
| VIC7927 | EPI_ISL_564749  |
| VIC7928 | EPI_ISL_564750  |
| VIC7929 | EPI_ISL_564751  |
| VIC793  | EPI_ISL_427068  |
| VIC7930 | EPI_ISL_564752  |
| VIC7931 | EPI_ISL_564753  |
| VIC7932 | EPI_ISL_564754  |
| VIC7933 | EPI_ISL_564755  |
| VIC7934 | EPI_ISL_564756  |
| VIC7935 | EPI_ISL_564757  |
| VIC7936 | EPI_ISL_564758  |
| VIC7939 | EPI_ISL_562061  |
| VIC794  | EPI_ISL_427069  |
| VIC7940 | EPI_ISL_564759  |
| VIC7941 | EPI_ISL_564760  |
| VIC7942 | EPI_ISL_564761  |
| VIC7944 | EPI_ISL_1055329 |
| VIC7945 | EPI_ISL_564762  |
| VIC7947 | EPI_ISL_564763  |
| VIC7948 | EPI_ISL_564764  |
| VIC7951 | EPI_ISL_564765  |
| VIC7952 | EPI_ISL_562111  |
| VIC7953 | EPI_ISL_1055330 |
| VIC7955 | EPI_ISL_564766  |
| VIC7956 | EPI_ISL_564767  |
| VIC7957 | EPI_ISL_564768  |
| VIC7958 | EPI_ISL_564769  |
| VIC7959 | EPI_ISL_564770  |
| VIC796  | EPI_ISL_427070  |
| VIC7960 | EPI_ISL_564771  |
| VIC7961 | EPI_ISL_564772  |
| VIC7962 | EPI_ISL_564773  |
| VIC7963 | EPI_ISL_564774  |
| VIC7964 | EPI_ISL_564775  |
| VIC7966 | EPI_ISL_564776  |
| VIC7967 | EPI_ISL_562660  |
| VIC7968 | EPI_ISL_564777  |
| VIC7969 | EPI_ISL_564778  |
| VIC797  | EPI_ISL_427071  |
| VIC7970 | EPI_ISL_564779  |
| VIC7971 | EPI_ISL_564780  |
| VIC7972 | EPI_ISL_594136  |
| VIC7973 | EPI_ISL_564781  |
| VIC7974 | EPI_ISL_564782  |

|         |                |
|---------|----------------|
| VIC7975 | EPI_ISL_561884 |
| VIC7976 | EPI_ISL_564783 |
| VIC7977 | EPI_ISL_564784 |
| VIC7978 | EPI_ISL_564785 |
| VIC7979 | EPI_ISL_564786 |
| VIC798  | EPI_ISL_427072 |
| VIC7980 | EPI_ISL_564787 |
| VIC7982 | EPI_ISL_564788 |
| VIC7984 | EPI_ISL_564789 |
| VIC7985 | EPI_ISL_564790 |
| VIC7986 | EPI_ISL_564791 |
| VIC7987 | EPI_ISL_564792 |
| VIC7988 | EPI_ISL_564793 |
| VIC799  | EPI_ISL_427073 |
| VIC7990 | EPI_ISL_562054 |
| VIC7991 | EPI_ISL_564794 |
| VIC7993 | EPI_ISL_564795 |
| VIC7997 | EPI_ISL_564797 |
| VIC7998 | EPI_ISL_564798 |
| VIC80   | EPI_ISL_419792 |
| VIC800  | EPI_ISL_427074 |
| VIC8004 | EPI_ISL_561646 |
| VIC8006 | EPI_ISL_564799 |
| VIC8008 | EPI_ISL_564800 |
| VIC8009 | EPI_ISL_564801 |
| VIC8010 | EPI_ISL_562058 |
| VIC8012 | EPI_ISL_564802 |
| VIC8016 | EPI_ISL_564804 |
| VIC8018 | EPI_ISL_564805 |
| VIC8019 | EPI_ISL_561868 |
| VIC802  | EPI_ISL_427076 |
| VIC8020 | EPI_ISL_564806 |
| VIC8022 | EPI_ISL_564807 |
| VIC8023 | EPI_ISL_564808 |
| VIC8024 | EPI_ISL_562047 |
| VIC8027 | EPI_ISL_564809 |
| VIC8028 | EPI_ISL_564810 |
| VIC803  | EPI_ISL_427077 |
| VIC8030 | EPI_ISL_564811 |
| VIC8032 | EPI_ISL_564812 |
| VIC8033 | EPI_ISL_564813 |
| VIC8037 | EPI_ISL_564814 |
| VIC804  | EPI_ISL_427078 |
| VIC8040 | EPI_ISL_564815 |
| VIC8044 | EPI_ISL_562024 |
| VIC8045 | EPI_ISL_561634 |
| VIC8046 | EPI_ISL_564816 |
| VIC8047 | EPI_ISL_564817 |
| VIC805  | EPI_ISL_427079 |
| VIC8050 | EPI_ISL_564818 |
| VIC8051 | EPI_ISL_564819 |
| VIC8053 | EPI_ISL_564821 |



|         |                 |
|---------|-----------------|
| VIC8055 | EPI_ISL_564822  |
| VIC8058 | EPI_ISL_564823  |
| VIC8059 | EPI_ISL_564824  |
| VIC806  | EPI_ISL_427080  |
| VIC8060 | EPI_ISL_564825  |
| VIC8061 | EPI_ISL_564826  |
| VIC8062 | EPI_ISL_564827  |
| VIC8069 | EPI_ISL_564830  |
| VIC807  | EPI_ISL_427081  |
| VIC8073 | EPI_ISL_564832  |
| VIC8074 | EPI_ISL_564833  |
| VIC8076 | EPI_ISL_562624  |
| VIC8077 | EPI_ISL_564835  |
| VIC8078 | EPI_ISL_564836  |
| VIC808  | EPI_ISL_427082  |
| VIC8081 | EPI_ISL_564837  |
| VIC8082 | EPI_ISL_564838  |
| VIC8085 | EPI_ISL_564839  |
| VIC8086 | EPI_ISL_564840  |
| VIC8087 | EPI_ISL_564841  |
| VIC8089 | EPI_ISL_561525  |
| VIC809  | EPI_ISL_427083  |
| VIC8090 | EPI_ISL_1055331 |
| VIC8091 | EPI_ISL_564842  |
| VIC8092 | EPI_ISL_564843  |
| VIC8093 | EPI_ISL_562661  |
| VIC8094 | EPI_ISL_564844  |
| VIC8096 | EPI_ISL_564845  |
| VIC8098 | EPI_ISL_564846  |
| VIC81   | EPI_ISL_419793  |
| VIC810  | EPI_ISL_427084  |
| VIC8100 | EPI_ISL_564848  |
| VIC8102 | EPI_ISL_564849  |
| VIC8103 | EPI_ISL_564850  |
| VIC8104 | EPI_ISL_564851  |
| VIC8105 | EPI_ISL_564852  |
| VIC8107 | EPI_ISL_564853  |
| VIC8108 | EPI_ISL_564854  |
| VIC8109 | EPI_ISL_562662  |
| VIC8110 | EPI_ISL_564855  |
| VIC8113 | EPI_ISL_564856  |
| VIC8114 | EPI_ISL_564857  |
| VIC8115 | EPI_ISL_564858  |
| VIC8117 | EPI_ISL_561847  |
| VIC8118 | EPI_ISL_561824  |
| VIC8120 | EPI_ISL_564859  |
| VIC8121 | EPI_ISL_564860  |
| VIC8122 | EPI_ISL_564861  |
| VIC8123 | EPI_ISL_564862  |
| VIC8124 | EPI_ISL_564863  |
| VIC8125 | EPI_ISL_564864  |
| VIC8126 | EPI_ISL_562119  |

|         |                 |
|---------|-----------------|
| VIC8127 | EPI_ISL_564865  |
| VIC8129 | EPI_ISL_564866  |
| VIC8130 | EPI_ISL_564867  |
| VIC8131 | EPI_ISL_564868  |
| VIC8132 | EPI_ISL_564869  |
| VIC8138 | EPI_ISL_564870  |
| VIC814  | EPI_ISL_427087  |
| VIC8143 | EPI_ISL_564871  |
| VIC8144 | EPI_ISL_1055332 |
| VIC8145 | EPI_ISL_564872  |
| VIC8147 | EPI_ISL_564873  |
| VIC8150 | EPI_ISL_564874  |
| VIC8153 | EPI_ISL_564875  |
| VIC8154 | EPI_ISL_562036  |
| VIC8157 | EPI_ISL_564876  |
| VIC8158 | EPI_ISL_561941  |
| VIC8159 | EPI_ISL_564877  |
| VIC816  | EPI_ISL_427089  |
| VIC8160 | EPI_ISL_564878  |
| VIC8161 | EPI_ISL_564879  |
| VIC8164 | EPI_ISL_564880  |
| VIC8165 | EPI_ISL_564881  |
| VIC8168 | EPI_ISL_562093  |
| VIC8169 | EPI_ISL_564882  |
| VIC8170 | EPI_ISL_562663  |
| VIC8171 | EPI_ISL_564883  |
| VIC8175 | EPI_ISL_564885  |
| VIC8176 | EPI_ISL_562094  |
| VIC8179 | Rejected        |
| VIC8181 | EPI_ISL_564886  |
| VIC8182 | EPI_ISL_564887  |
| VIC8183 | EPI_ISL_564888  |
| VIC8184 | EPI_ISL_564889  |
| VIC8185 | EPI_ISL_562037  |
| VIC8187 | EPI_ISL_564890  |
| VIC8188 | EPI_ISL_562664  |
| VIC8189 | EPI_ISL_564891  |
| VIC8190 | EPI_ISL_561504  |
| VIC8191 | EPI_ISL_564892  |
| VIC8193 | EPI_ISL_562134  |
| VIC8195 | EPI_ISL_564893  |
| VIC8196 | EPI_ISL_564894  |
| VIC8197 | EPI_ISL_564895  |
| VIC8199 | EPI_ISL_564896  |
| VIC82   | EPI_ISL_419794  |
| VIC820  | EPI_ISL_427092  |
| VIC8200 | EPI_ISL_561786  |
| VIC8202 | EPI_ISL_564897  |
| VIC8203 | EPI_ISL_564898  |
| VIC8207 | EPI_ISL_564899  |
| VIC8209 | EPI_ISL_564901  |
| VIC8210 | EPI_ISL_564902  |

|         |                 |
|---------|-----------------|
| VIC8211 | Rejected        |
| VIC8212 | EPI_ISL_564903  |
| VIC8214 | EPI_ISL_564904  |
| VIC8215 | EPI_ISL_564905  |
| VIC8216 | EPI_ISL_562146  |
| VIC8218 | EPI_ISL_562144  |
| VIC8219 | EPI_ISL_564906  |
| VIC8221 | EPI_ISL_564907  |
| VIC8222 | EPI_ISL_564908  |
| VIC8224 | EPI_ISL_561869  |
| VIC8225 | EPI_ISL_562147  |
| VIC8227 | EPI_ISL_564909  |
| VIC8229 | EPI_ISL_564910  |
| VIC823  | EPI_ISL_427094  |
| VIC8231 | EPI_ISL_562139  |
| VIC8232 | EPI_ISL_564911  |
| VIC8235 | EPI_ISL_562706  |
| VIC8236 | EPI_ISL_564912  |
| VIC8238 | EPI_ISL_564913  |
| VIC824  | EPI_ISL_427095  |
| VIC8240 | EPI_ISL_564915  |
| VIC8241 | EPI_ISL_564916  |
| VIC8243 | EPI_ISL_564917  |
| VIC8244 | EPI_ISL_561794  |
| VIC8246 | EPI_ISL_564918  |
| VIC8248 | EPI_ISL_564919  |
| VIC8252 | EPI_ISL_1055333 |
| VIC8254 | EPI_ISL_564920  |
| VIC8255 | EPI_ISL_564921  |
| VIC8261 | EPI_ISL_564922  |
| VIC8264 | EPI_ISL_561912  |
| VIC8266 | EPI_ISL_564923  |
| VIC8274 | EPI_ISL_561581  |
| VIC8278 | EPI_ISL_564925  |
| VIC828  | EPI_ISL_427096  |
| VIC8281 | EPI_ISL_564927  |
| VIC8284 | EPI_ISL_562689  |
| VIC8285 | EPI_ISL_561746  |
| VIC8286 | EPI_ISL_561937  |
| VIC8288 | EPI_ISL_561836  |
| VIC8289 | EPI_ISL_562625  |
| VIC829  | EPI_ISL_427097  |
| VIC8293 | EPI_ISL_564928  |
| VIC8295 | EPI_ISL_562626  |
| VIC8296 | EPI_ISL_561643  |
| VIC8297 | EPI_ISL_564929  |
| VIC83   | EPI_ISL_419799  |
| VIC8302 | EPI_ISL_561665  |
| VIC8303 | EPI_ISL_564930  |
| VIC8304 | EPI_ISL_564931  |
| VIC8305 | EPI_ISL_564932  |
| VIC8306 | EPI_ISL_564933  |

|         |                |
|---------|----------------|
| VIC8307 | EPI_ISL_561596 |
| VIC8308 | EPI_ISL_561570 |
| VIC8309 | EPI_ISL_564934 |
| VIC8311 | EPI_ISL_564935 |
| VIC8314 | EPI_ISL_564936 |
| VIC8315 | EPI_ISL_564937 |
| VIC8316 | EPI_ISL_561705 |
| VIC8318 | EPI_ISL_561624 |
| VIC8320 | EPI_ISL_562665 |
| VIC8322 | EPI_ISL_564938 |
| VIC8323 | EPI_ISL_564939 |
| VIC8324 | EPI_ISL_564940 |
| VIC8327 | EPI_ISL_564942 |
| VIC8328 | EPI_ISL_564943 |
| VIC8330 | EPI_ISL_564944 |
| VIC8331 | EPI_ISL_564945 |
| VIC8332 | EPI_ISL_561862 |
| VIC8333 | EPI_ISL_564946 |
| VIC8334 | EPI_ISL_564947 |
| VIC8335 | EPI_ISL_564948 |
| VIC8336 | EPI_ISL_564949 |
| VIC8337 | EPI_ISL_564950 |
| VIC8339 | EPI_ISL_564951 |
| VIC8340 | EPI_ISL_564952 |
| VIC8341 | EPI_ISL_564953 |
| VIC8342 | EPI_ISL_564954 |
| VIC8343 | EPI_ISL_564955 |
| VIC8344 | EPI_ISL_594137 |
| VIC8345 | EPI_ISL_564956 |
| VIC8346 | EPI_ISL_564957 |
| VIC8347 | EPI_ISL_562140 |
| VIC8348 | EPI_ISL_564958 |
| VIC8349 | EPI_ISL_564959 |
| VIC8350 | EPI_ISL_564960 |
| VIC8352 | EPI_ISL_564961 |
| VIC8353 | EPI_ISL_564962 |
| VIC8354 | EPI_ISL_564963 |
| VIC836  | EPI_ISL_427100 |
| VIC8361 | EPI_ISL_562666 |
| VIC8362 | EPI_ISL_564964 |
| VIC8363 | EPI_ISL_564965 |
| VIC8364 | EPI_ISL_564966 |
| VIC8366 | EPI_ISL_564967 |
| VIC8367 | EPI_ISL_564968 |
| VIC8368 | EPI_ISL_564969 |
| VIC837  | EPI_ISL_427101 |
| VIC8370 | EPI_ISL_564970 |
| VIC8374 | EPI_ISL_564971 |
| VIC8375 | EPI_ISL_564972 |
| VIC8379 | EPI_ISL_564973 |
| VIC8382 | EPI_ISL_564974 |
| VIC8385 | EPI_ISL_564975 |

|         |                 |
|---------|-----------------|
| VIC8386 | EPI_ISL_564976  |
| VIC8387 | EPI_ISL_564977  |
| VIC8389 | EPI_ISL_564978  |
| VIC8391 | EPI_ISL_564979  |
| VIC8392 | EPI_ISL_564980  |
| VIC8393 | EPI_ISL_564981  |
| VIC8394 | EPI_ISL_564982  |
| VIC8395 | EPI_ISL_564983  |
| VIC8396 | EPI_ISL_564984  |
| VIC8398 | EPI_ISL_564985  |
| VIC84   | EPI_ISL_419803  |
| VIC8400 | EPI_ISL_564986  |
| VIC8401 | EPI_ISL_564987  |
| VIC8402 | EPI_ISL_564988  |
| VIC8403 | EPI_ISL_564989  |
| VIC8405 | EPI_ISL_564990  |
| VIC8407 | EPI_ISL_564991  |
| VIC8408 | EPI_ISL_564992  |
| VIC8410 | EPI_ISL_564993  |
| VIC8411 | EPI_ISL_562758  |
| VIC8412 | EPI_ISL_564994  |
| VIC8413 | EPI_ISL_564995  |
| VIC8414 | EPI_ISL_1055334 |
| VIC8415 | EPI_ISL_564996  |
| VIC8416 | EPI_ISL_564997  |
| VIC8417 | EPI_ISL_564998  |
| VIC8419 | EPI_ISL_564999  |
| VIC842  | EPI_ISL_427102  |
| VIC8420 | EPI_ISL_565000  |
| VIC8422 | EPI_ISL_565001  |
| VIC8424 | EPI_ISL_565002  |
| VIC8425 | EPI_ISL_565003  |
| VIC8427 | EPI_ISL_565004  |
| VIC8429 | EPI_ISL_565005  |
| VIC843  | EPI_ISL_427103  |
| VIC8431 | EPI_ISL_565006  |
| VIC8433 | EPI_ISL_565007  |
| VIC8434 | EPI_ISL_565008  |
| VIC8435 | EPI_ISL_565009  |
| VIC8436 | EPI_ISL_565010  |
| VIC8437 | EPI_ISL_565011  |
| VIC8438 | EPI_ISL_565012  |
| VIC8440 | EPI_ISL_565013  |
| VIC8441 | EPI_ISL_565014  |
| VIC8442 | EPI_ISL_565015  |
| VIC8443 | EPI_ISL_565016  |
| VIC8445 | EPI_ISL_565017  |
| VIC8446 | EPI_ISL_565018  |
| VIC8447 | EPI_ISL_565019  |
| VIC8448 | EPI_ISL_565020  |
| VIC8449 | EPI_ISL_565021  |
| VIC845  | EPI_ISL_427105  |

|         |                 |
|---------|-----------------|
| VIC8450 | EPI_ISL_565022  |
| VIC8451 | EPI_ISL_565023  |
| VIC8452 | EPI_ISL_565024  |
| VIC8454 | EPI_ISL_565025  |
| VIC8455 | EPI_ISL_565026  |
| VIC8457 | EPI_ISL_565027  |
| VIC8458 | EPI_ISL_565028  |
| VIC8459 | EPI_ISL_565029  |
| VIC846  | EPI_ISL_427106  |
| VIC8460 | EPI_ISL_565030  |
| VIC8461 | EPI_ISL_565031  |
| VIC8462 | EPI_ISL_565032  |
| VIC8463 | EPI_ISL_565033  |
| VIC8464 | EPI_ISL_565034  |
| VIC8465 | EPI_ISL_562100  |
| VIC8467 | EPI_ISL_565035  |
| VIC8468 | EPI_ISL_565036  |
| VIC847  | EPI_ISL_427107  |
| VIC8470 | EPI_ISL_565037  |
| VIC8471 | EPI_ISL_565038  |
| VIC8472 | EPI_ISL_565039  |
| VIC8474 | EPI_ISL_565040  |
| VIC8475 | EPI_ISL_565041  |
| VIC8476 | EPI_ISL_561960  |
| VIC8477 | EPI_ISL_565042  |
| VIC8478 | EPI_ISL_565043  |
| VIC8479 | EPI_ISL_565044  |
| VIC848  | EPI_ISL_427108  |
| VIC8480 | EPI_ISL_565045  |
| VIC8481 | EPI_ISL_565046  |
| VIC8482 | EPI_ISL_562627  |
| VIC8486 | EPI_ISL_565048  |
| VIC8487 | EPI_ISL_565049  |
| VIC8488 | EPI_ISL_562095  |
| VIC8495 | EPI_ISL_565051  |
| VIC8496 | EPI_ISL_565052  |
| VIC8497 | EPI_ISL_565053  |
| VIC8498 | EPI_ISL_565054  |
| VIC85   | EPI_ISL_419795  |
| VIC850  | EPI_ISL_427110  |
| VIC8500 | EPI_ISL_562170  |
| VIC8501 | EPI_ISL_565055  |
| VIC8502 | EPI_ISL_565056  |
| VIC8503 | EPI_ISL_1055335 |
| VIC8505 | EPI_ISL_565057  |
| VIC8506 | EPI_ISL_565058  |
| VIC8507 | EPI_ISL_565059  |
| VIC8508 | EPI_ISL_565060  |
| VIC8509 | EPI_ISL_565061  |
| VIC851  | EPI_ISL_427111  |
| VIC8510 | EPI_ISL_565062  |
| VIC8511 | EPI_ISL_565063  |

|         |                 |
|---------|-----------------|
| VIC8513 | EPI_ISL_565064  |
| VIC8514 | EPI_ISL_565065  |
| VIC8515 | EPI_ISL_565066  |
| VIC8517 | EPI_ISL_565067  |
| VIC8518 | EPI_ISL_565068  |
| VIC8519 | EPI_ISL_565069  |
| VIC852  | EPI_ISL_427112  |
| VIC8520 | EPI_ISL_565070  |
| VIC8521 | EPI_ISL_565071  |
| VIC8522 | EPI_ISL_1055336 |
| VIC8523 | EPI_ISL_565072  |
| VIC8524 | EPI_ISL_565073  |
| VIC8525 | EPI_ISL_565074  |
| VIC8526 | EPI_ISL_565075  |
| VIC8527 | EPI_ISL_565076  |
| VIC8528 | EPI_ISL_565077  |
| VIC8529 | EPI_ISL_1055337 |
| VIC853  | EPI_ISL_427113  |
| VIC8530 | EPI_ISL_565078  |
| VIC8531 | EPI_ISL_565079  |
| VIC8532 | EPI_ISL_565080  |
| VIC8536 | EPI_ISL_565081  |
| VIC854  | EPI_ISL_427114  |
| VIC8540 | EPI_ISL_562114  |
| VIC8541 | EPI_ISL_565082  |
| VIC8544 | Rejected        |
| VIC8545 | EPI_ISL_565083  |
| VIC8547 | EPI_ISL_565084  |
| VIC8548 | EPI_ISL_565085  |
| VIC8549 | EPI_ISL_565086  |
| VIC8550 | EPI_ISL_565087  |
| VIC8551 | EPI_ISL_562071  |
| VIC8552 | EPI_ISL_565088  |
| VIC8558 | EPI_ISL_565089  |
| VIC8559 | EPI_ISL_565090  |
| VIC856  | EPI_ISL_427115  |
| VIC8562 | EPI_ISL_565091  |
| VIC8563 | EPI_ISL_565092  |
| VIC8565 | EPI_ISL_565093  |
| VIC8566 | EPI_ISL_565094  |
| VIC857  | EPI_ISL_427116  |
| VIC8570 | EPI_ISL_565096  |
| VIC8571 | EPI_ISL_565097  |
| VIC858  | EPI_ISL_427117  |
| VIC8580 | EPI_ISL_565099  |
| VIC8582 | EPI_ISL_561913  |
| VIC8584 | EPI_ISL_565100  |
| VIC8586 | EPI_ISL_565101  |
| VIC8588 | EPI_ISL_565102  |
| VIC8589 | EPI_ISL_565103  |
| VIC8591 | EPI_ISL_561472  |
| VIC8592 | EPI_ISL_565104  |

|         |                 |
|---------|-----------------|
| VIC8593 | EPI_ISL_561719  |
| VIC8599 | EPI_ISL_561878  |
| VIC86   | EPI_ISL_419796  |
| VIC860  | EPI_ISL_427118  |
| VIC8602 | EPI_ISL_565105  |
| VIC8603 | EPI_ISL_565106  |
| VIC8604 | EPI_ISL_565107  |
| VIC8605 | EPI_ISL_565108  |
| VIC8607 | EPI_ISL_561837  |
| VIC8609 | EPI_ISL_561605  |
| VIC8610 | EPI_ISL_565109  |
| VIC8611 | EPI_ISL_565110  |
| VIC8612 | EPI_ISL_1055338 |
| VIC8614 | EPI_ISL_1055339 |
| VIC8617 | EPI_ISL_562171  |
| VIC8619 | EPI_ISL_565111  |
| VIC862  | EPI_ISL_427119  |
| VIC8621 | EPI_ISL_565112  |
| VIC8622 | EPI_ISL_565113  |
| VIC8623 | EPI_ISL_565114  |
| VIC8624 | EPI_ISL_565115  |
| VIC8625 | EPI_ISL_565116  |
| VIC8626 | EPI_ISL_565117  |
| VIC8627 | EPI_ISL_565118  |
| VIC8628 | EPI_ISL_565119  |
| VIC8629 | EPI_ISL_565120  |
| VIC863  | EPI_ISL_427120  |
| VIC8631 | EPI_ISL_565122  |
| VIC8632 | EPI_ISL_565123  |
| VIC8633 | EPI_ISL_565124  |
| VIC8638 | EPI_ISL_565125  |
| VIC864  | EPI_ISL_427121  |
| VIC8640 | EPI_ISL_562038  |
| VIC8642 | EPI_ISL_565126  |
| VIC8643 | EPI_ISL_565127  |
| VIC8644 | EPI_ISL_565128  |
| VIC8646 | EPI_ISL_561731  |
| VIC8648 | EPI_ISL_561561  |
| VIC8649 | EPI_ISL_565129  |
| VIC8651 | EPI_ISL_565130  |
| VIC8652 | EPI_ISL_565131  |
| VIC8653 | Rejected        |
| VIC8654 | EPI_ISL_561579  |
| VIC8656 | EPI_ISL_594135  |
| VIC8657 | EPI_ISL_561938  |
| VIC8658 | EPI_ISL_565132  |
| VIC866  | Rejected        |
| VIC8660 | EPI_ISL_565133  |
| VIC8661 | EPI_ISL_565134  |
| VIC8662 | EPI_ISL_562052  |
| VIC8663 | EPI_ISL_561716  |
| VIC8665 | EPI_ISL_565135  |



|         |                |
|---------|----------------|
| VIC867  | EPI_ISL_427122 |
| VIC8670 | EPI_ISL_565137 |
| VIC8672 | EPI_ISL_561498 |
| VIC8673 | EPI_ISL_565138 |
| VIC8674 | EPI_ISL_565139 |
| VIC868  | EPI_ISL_427123 |
| VIC869  | EPI_ISL_427124 |
| VIC8691 | EPI_ISL_565141 |
| VIC8693 | EPI_ISL_561791 |
| VIC8695 | EPI_ISL_561584 |
| VIC87   | EPI_ISL_419797 |
| VIC870  | EPI_ISL_427125 |
| VIC8701 | EPI_ISL_565144 |
| VIC8702 | EPI_ISL_565145 |
| VIC8703 | EPI_ISL_561987 |
| VIC8704 | EPI_ISL_565146 |
| VIC8705 | EPI_ISL_565147 |
| VIC8707 | EPI_ISL_561787 |
| VIC8708 | EPI_ISL_565148 |
| VIC8709 | EPI_ISL_565149 |
| VIC871  | EPI_ISL_427126 |
| VIC8710 | EPI_ISL_565150 |
| VIC8711 | EPI_ISL_565151 |
| VIC8712 | EPI_ISL_565152 |
| VIC8715 | EPI_ISL_565153 |
| VIC8716 | EPI_ISL_565154 |
| VIC8720 | EPI_ISL_565156 |
| VIC8721 | EPI_ISL_565157 |
| VIC8728 | EPI_ISL_565158 |
| VIC8729 | EPI_ISL_565159 |
| VIC8731 | EPI_ISL_561409 |
| VIC8732 | EPI_ISL_565160 |
| VIC8733 | EPI_ISL_565161 |
| VIC8734 | EPI_ISL_561975 |
| VIC8735 | EPI_ISL_565162 |
| VIC8736 | EPI_ISL_565163 |
| VIC8737 | EPI_ISL_565164 |
| VIC8738 | EPI_ISL_565165 |
| VIC8739 | EPI_ISL_565166 |
| VIC874  | EPI_ISL_427129 |
| VIC8740 | EPI_ISL_565167 |
| VIC8741 | EPI_ISL_565168 |
| VIC8742 | EPI_ISL_565169 |
| VIC8743 | EPI_ISL_565170 |
| VIC8744 | EPI_ISL_565171 |
| VIC8749 | EPI_ISL_565172 |
| VIC8750 | EPI_ISL_565173 |
| VIC8751 | EPI_ISL_565174 |
| VIC8752 | EPI_ISL_565175 |
| VIC8753 | EPI_ISL_561894 |
| VIC8755 | EPI_ISL_565176 |
| VIC8756 | EPI_ISL_565177 |

|         |                 |
|---------|-----------------|
| VIC8757 | EPI_ISL_565178  |
| VIC8758 | EPI_ISL_565179  |
| VIC8759 | EPI_ISL_565180  |
| VIC876  | EPI_ISL_427131  |
| VIC8761 | EPI_ISL_565181  |
| VIC8762 | EPI_ISL_561612  |
| VIC8763 | EPI_ISL_561621  |
| VIC8764 | EPI_ISL_594141  |
| VIC8766 | EPI_ISL_594140  |
| VIC8767 | EPI_ISL_565182  |
| VIC8768 | EPI_ISL_565183  |
| VIC8769 | EPI_ISL_565184  |
| VIC8772 | EPI_ISL_1055340 |
| VIC8773 | EPI_ISL_565185  |
| VIC8774 | EPI_ISL_565186  |
| VIC8776 | EPI_ISL_565187  |
| VIC8777 | EPI_ISL_565188  |
| VIC8779 | EPI_ISL_565189  |
| VIC8781 | EPI_ISL_565190  |
| VIC8782 | EPI_ISL_565191  |
| VIC8783 | EPI_ISL_565192  |
| VIC8784 | EPI_ISL_565193  |
| VIC8785 | EPI_ISL_565194  |
| VIC8787 | EPI_ISL_565195  |
| VIC8789 | EPI_ISL_565196  |
| VIC879  | EPI_ISL_427134  |
| VIC8790 | EPI_ISL_565197  |
| VIC8791 | EPI_ISL_565198  |
| VIC8793 | EPI_ISL_565199  |
| VIC8794 | EPI_ISL_565200  |
| VIC8795 | EPI_ISL_565201  |
| VIC8796 | EPI_ISL_561661  |
| VIC8797 | EPI_ISL_562081  |
| VIC8798 | EPI_ISL_565202  |
| VIC88   | EPI_ISL_419798  |
| VIC8800 | EPI_ISL_565203  |
| VIC8801 | EPI_ISL_565204  |
| VIC8802 | EPI_ISL_565205  |
| VIC8804 | EPI_ISL_565206  |
| VIC8805 | EPI_ISL_565207  |
| VIC8806 | EPI_ISL_565208  |
| VIC8807 | EPI_ISL_565209  |
| VIC881  | EPI_ISL_427135  |
| VIC8811 | EPI_ISL_565210  |
| VIC8812 | EPI_ISL_1055341 |
| VIC8813 | EPI_ISL_565211  |
| VIC8814 | EPI_ISL_565212  |
| VIC8815 | EPI_ISL_565213  |
| VIC8816 | EPI_ISL_565214  |
| VIC8818 | EPI_ISL_565215  |
| VIC8819 | EPI_ISL_565216  |
| VIC8822 | EPI_ISL_562628  |

|         |                 |
|---------|-----------------|
| VIC8824 | EPI_ISL_565217  |
| VIC8825 | EPI_ISL_565218  |
| VIC8826 | EPI_ISL_565219  |
| VIC8828 | EPI_ISL_565220  |
| VIC883  | EPI_ISL_427136  |
| VIC8830 | EPI_ISL_565221  |
| VIC8831 | EPI_ISL_565222  |
| VIC8833 | EPI_ISL_565223  |
| VIC8834 | EPI_ISL_565224  |
| VIC8835 | EPI_ISL_565225  |
| VIC8836 | EPI_ISL_562070  |
| VIC8837 | EPI_ISL_565226  |
| VIC8840 | EPI_ISL_565227  |
| VIC8841 | EPI_ISL_565228  |
| VIC8842 | EPI_ISL_565229  |
| VIC8843 | EPI_ISL_565230  |
| VIC8845 | EPI_ISL_565231  |
| VIC8846 | EPI_ISL_565232  |
| VIC8847 | EPI_ISL_565233  |
| VIC8848 | EPI_ISL_565234  |
| VIC8849 | EPI_ISL_1055342 |
| VIC885  | EPI_ISL_427138  |
| VIC8850 | EPI_ISL_565235  |
| VIC8851 | EPI_ISL_565236  |
| VIC8852 | EPI_ISL_565237  |
| VIC8853 | EPI_ISL_565238  |
| VIC8854 | EPI_ISL_565239  |
| VIC8855 | EPI_ISL_565240  |
| VIC8856 | EPI_ISL_565241  |
| VIC8858 | EPI_ISL_565242  |
| VIC8859 | EPI_ISL_561652  |
| VIC8860 | EPI_ISL_565243  |
| VIC8863 | EPI_ISL_1055343 |
| VIC8864 | EPI_ISL_565245  |
| VIC8865 | EPI_ISL_565246  |
| VIC8867 | EPI_ISL_562667  |
| VIC8869 | EPI_ISL_565248  |
| VIC887  | EPI_ISL_427140  |
| VIC8870 | EPI_ISL_565249  |
| VIC8871 | EPI_ISL_565250  |
| VIC8872 | EPI_ISL_565251  |
| VIC8873 | EPI_ISL_565252  |
| VIC8874 | EPI_ISL_565253  |
| VIC8875 | EPI_ISL_565254  |
| VIC8876 | EPI_ISL_565255  |
| VIC8878 | EPI_ISL_565256  |
| VIC8879 | EPI_ISL_565257  |
| VIC8880 | EPI_ISL_565258  |
| VIC8881 | EPI_ISL_561442  |
| VIC8883 | EPI_ISL_565259  |
| VIC8884 | EPI_ISL_565260  |
| VIC8885 | EPI_ISL_565261  |

|         |                 |
|---------|-----------------|
| VIC8886 | EPI_ISL_565262  |
| VIC8887 | EPI_ISL_565263  |
| VIC8888 | EPI_ISL_561809  |
| VIC8889 | EPI_ISL_565264  |
| VIC8891 | EPI_ISL_562668  |
| VIC8892 | EPI_ISL_565266  |
| VIC8893 | EPI_ISL_565267  |
| VIC8894 | EPI_ISL_565268  |
| VIC8895 | EPI_ISL_1055344 |
| VIC8896 | EPI_ISL_565269  |
| VIC8897 | EPI_ISL_565270  |
| VIC8898 | EPI_ISL_561509  |
| VIC8899 | EPI_ISL_565271  |
| VIC89   | EPI_ISL_419800  |
| VIC8900 | EPI_ISL_565272  |
| VIC8902 | EPI_ISL_565273  |
| VIC8903 | EPI_ISL_565274  |
| VIC8904 | EPI_ISL_565275  |
| VIC8905 | EPI_ISL_565276  |
| VIC8906 | EPI_ISL_562077  |
| VIC8908 | EPI_ISL_565277  |
| VIC8909 | EPI_ISL_594138  |
| VIC8910 | EPI_ISL_565278  |
| VIC8911 | EPI_ISL_565279  |
| VIC8912 | EPI_ISL_565280  |
| VIC8914 | EPI_ISL_1055345 |
| VIC8915 | EPI_ISL_565281  |
| VIC8916 | EPI_ISL_565282  |
| VIC892  | EPI_ISL_427144  |
| VIC8924 | EPI_ISL_561685  |
| VIC8925 | EPI_ISL_565283  |
| VIC8927 | EPI_ISL_565284  |
| VIC8928 | EPI_ISL_562707  |
| VIC8929 | EPI_ISL_565285  |
| VIC893  | EPI_ISL_427145  |
| VIC8930 | EPI_ISL_565286  |
| VIC8932 | EPI_ISL_565287  |
| VIC8933 | EPI_ISL_565288  |
| VIC8935 | EPI_ISL_565290  |
| VIC8936 | EPI_ISL_565291  |
| VIC8937 | EPI_ISL_565292  |
| VIC8939 | EPI_ISL_565293  |
| VIC894  | EPI_ISL_427146  |
| VIC8940 | EPI_ISL_565294  |
| VIC8941 | EPI_ISL_565295  |
| VIC8942 | EPI_ISL_565296  |
| VIC8943 | EPI_ISL_565297  |
| VIC8944 | EPI_ISL_565298  |
| VIC8945 | EPI_ISL_565299  |
| VIC8946 | EPI_ISL_565300  |
| VIC8947 | EPI_ISL_565301  |
| VIC8948 | EPI_ISL_565302  |

|         |                |
|---------|----------------|
| VIC8949 | EPI_ISL_565303 |
| VIC8950 | EPI_ISL_565304 |
| VIC8951 | EPI_ISL_565305 |
| VIC8952 | EPI_ISL_565306 |
| VIC8953 | EPI_ISL_565307 |
| VIC8954 | EPI_ISL_565308 |
| VIC8955 | EPI_ISL_565309 |
| VIC8956 | EPI_ISL_562101 |
| VIC8957 | EPI_ISL_565310 |
| VIC8958 | Rejected       |
| VIC8960 | EPI_ISL_565312 |
| VIC8961 | EPI_ISL_565313 |
| VIC8962 | EPI_ISL_565314 |
| VIC8963 | EPI_ISL_565315 |
| VIC8964 | EPI_ISL_565316 |
| VIC8965 | EPI_ISL_565317 |
| VIC8966 | EPI_ISL_565318 |
| VIC8967 | EPI_ISL_565319 |
| VIC8968 | EPI_ISL_565320 |
| VIC8969 | EPI_ISL_565321 |
| VIC8971 | EPI_ISL_565323 |
| VIC8973 | EPI_ISL_565324 |
| VIC8974 | EPI_ISL_565325 |
| VIC8976 | Rejected       |
| VIC8977 | EPI_ISL_565327 |
| VIC8978 | EPI_ISL_565328 |
| VIC8979 | EPI_ISL_565329 |
| VIC898  | EPI_ISL_427148 |
| VIC8980 | EPI_ISL_565330 |
| VIC8981 | EPI_ISL_565331 |
| VIC8982 | EPI_ISL_565332 |
| VIC8983 | EPI_ISL_565333 |
| VIC8984 | EPI_ISL_565334 |
| VIC8985 | EPI_ISL_565335 |
| VIC8986 | EPI_ISL_565336 |
| VIC8987 | EPI_ISL_565337 |
| VIC8988 | EPI_ISL_565338 |
| VIC8989 | EPI_ISL_565339 |
| VIC8990 | EPI_ISL_565340 |
| VIC8991 | EPI_ISL_565341 |
| VIC8992 | EPI_ISL_565342 |
| VIC8993 | EPI_ISL_565343 |
| VIC8994 | EPI_ISL_565344 |
| VIC8995 | EPI_ISL_565345 |
| VIC8996 | EPI_ISL_565346 |
| VIC8997 | EPI_ISL_565347 |
| VIC8998 | EPI_ISL_565348 |
| VIC8999 | EPI_ISL_565349 |
| VIC90   | EPI_ISL_419801 |
| VIC9000 | EPI_ISL_565350 |
| VIC9002 | EPI_ISL_561680 |
| VIC9006 | EPI_ISL_561627 |

|         |                 |
|---------|-----------------|
| VIC9007 | EPI_ISL_565351  |
| VIC9018 | EPI_ISL_565355  |
| VIC9019 | EPI_ISL_565356  |
| VIC9020 | EPI_ISL_565357  |
| VIC9021 | EPI_ISL_565358  |
| VIC9022 | EPI_ISL_1055346 |
| VIC9023 | EPI_ISL_565359  |
| VIC9024 | EPI_ISL_565360  |
| VIC9025 | EPI_ISL_565361  |
| VIC9026 | EPI_ISL_565362  |
| VIC9028 | EPI_ISL_565363  |
| VIC9029 | EPI_ISL_561464  |
| VIC9035 | EPI_ISL_565365  |
| VIC9036 | EPI_ISL_565366  |
| VIC9037 | EPI_ISL_565367  |
| VIC9039 | EPI_ISL_565368  |
| VIC9040 | EPI_ISL_565369  |
| VIC9041 | EPI_ISL_565370  |
| VIC9044 | EPI_ISL_565371  |
| VIC9045 | EPI_ISL_565372  |
| VIC9048 | EPI_ISL_565373  |
| VIC9049 | EPI_ISL_565374  |
| VIC9050 | EPI_ISL_561672  |
| VIC9051 | EPI_ISL_565375  |
| VIC9052 | EPI_ISL_561717  |
| VIC9055 | EPI_ISL_565376  |
| VIC9057 | EPI_ISL_565377  |
| VIC9060 | EPI_ISL_562699  |
| VIC9062 | EPI_ISL_565378  |
| VIC9065 | EPI_ISL_561699  |
| VIC9067 | EPI_ISL_561741  |
| VIC9069 | EPI_ISL_565379  |
| VIC9070 | EPI_ISL_565380  |
| VIC9071 | EPI_ISL_565381  |
| VIC9072 | EPI_ISL_562155  |
| VIC9075 | EPI_ISL_565382  |
| VIC9077 | EPI_ISL_565383  |
| VIC9078 | EPI_ISL_565384  |
| VIC9083 | EPI_ISL_565385  |
| VIC9085 | EPI_ISL_565386  |
| VIC9086 | EPI_ISL_565387  |
| VIC9090 | EPI_ISL_565389  |
| VIC9091 | EPI_ISL_565390  |
| VIC9093 | EPI_ISL_561997  |
| VIC91   | EPI_ISL_419804  |
| VIC9101 | EPI_ISL_565393  |
| VIC9107 | EPI_ISL_561618  |
| VIC9109 | EPI_ISL_565394  |
| VIC9113 | EPI_ISL_561905  |
| VIC9115 | EPI_ISL_565395  |
| VIC9118 | EPI_ISL_561978  |
| VIC9119 | EPI_ISL_565397  |

|         |                |
|---------|----------------|
| VIC912  | EPI_ISL_426881 |
| VIC9120 | Rejected       |
| VIC9121 | EPI_ISL_562169 |
| VIC9122 | EPI_ISL_565398 |
| VIC9126 | EPI_ISL_565400 |
| VIC9130 | EPI_ISL_562629 |
| VIC9133 | EPI_ISL_565403 |
| VIC9134 | EPI_ISL_565404 |
| VIC9135 | EPI_ISL_565405 |
| VIC9136 | EPI_ISL_565406 |
| VIC9140 | EPI_ISL_565407 |
| VIC9141 | EPI_ISL_565408 |
| VIC9142 | EPI_ISL_565409 |
| VIC9143 | EPI_ISL_565410 |
| VIC9144 | EPI_ISL_565411 |
| VIC9145 | EPI_ISL_565412 |
| VIC9146 | EPI_ISL_565413 |
| VIC9147 | EPI_ISL_565414 |
| VIC9152 | EPI_ISL_565415 |
| VIC9153 | EPI_ISL_561772 |
| VIC9156 | EPI_ISL_565417 |
| VIC9157 | EPI_ISL_561922 |
| VIC9160 | EPI_ISL_565418 |
| VIC9161 | EPI_ISL_565419 |
| VIC9163 | EPI_ISL_565420 |
| VIC9166 | EPI_ISL_561923 |
| VIC9167 | EPI_ISL_565421 |
| VIC9168 | EPI_ISL_562148 |
| VIC9170 | EPI_ISL_561804 |
| VIC9171 | EPI_ISL_565422 |
| VIC9175 | EPI_ISL_565423 |
| VIC9176 | EPI_ISL_562708 |
| VIC9177 | EPI_ISL_565424 |
| VIC9178 | EPI_ISL_565425 |
| VIC9181 | EPI_ISL_561444 |
| VIC9182 | EPI_ISL_565426 |
| VIC9183 | EPI_ISL_565427 |
| VIC9184 | EPI_ISL_565428 |
| VIC9186 | EPI_ISL_565429 |
| VIC9187 | EPI_ISL_565430 |
| VIC9188 | EPI_ISL_565431 |
| VIC9189 | EPI_ISL_565432 |
| VIC9190 | EPI_ISL_565433 |
| VIC9191 | EPI_ISL_565434 |
| VIC9192 | EPI_ISL_561991 |
| VIC9193 | EPI_ISL_565435 |
| VIC9194 | EPI_ISL_565436 |
| VIC9195 | EPI_ISL_565437 |
| VIC9196 | EPI_ISL_565438 |
| VIC9198 | EPI_ISL_561961 |
| VIC9199 | EPI_ISL_561720 |
| VIC92   | EPI_ISL_419809 |

|         |                 |
|---------|-----------------|
| VIC920  | EPI_ISL_427153  |
| VIC9201 | EPI_ISL_565439  |
| VIC9202 | EPI_ISL_565440  |
| VIC9203 | EPI_ISL_562096  |
| VIC9204 | EPI_ISL_565441  |
| VIC9205 | EPI_ISL_562690  |
| VIC9208 | EPI_ISL_565442  |
| VIC9210 | EPI_ISL_561924  |
| VIC9211 | EPI_ISL_565443  |
| VIC9212 | EPI_ISL_565444  |
| VIC9213 | EPI_ISL_565445  |
| VIC9215 | EPI_ISL_565446  |
| VIC9216 | EPI_ISL_565447  |
| VIC9217 | EPI_ISL_565448  |
| VIC9219 | EPI_ISL_565449  |
| VIC9220 | EPI_ISL_565450  |
| VIC9223 | EPI_ISL_565452  |
| VIC9224 | EPI_ISL_561906  |
| VIC9225 | EPI_ISL_565453  |
| VIC9226 | EPI_ISL_565454  |
| VIC9228 | EPI_ISL_1055347 |
| VIC9231 | EPI_ISL_565455  |
| VIC9232 | EPI_ISL_565456  |
| VIC9235 | EPI_ISL_565457  |
| VIC9237 | EPI_ISL_561853  |
| VIC9238 | EPI_ISL_565458  |
| VIC9239 | EPI_ISL_565459  |
| VIC9240 | EPI_ISL_565460  |
| VIC9242 | EPI_ISL_565461  |
| VIC9243 | EPI_ISL_565462  |
| VIC9244 | EPI_ISL_1055348 |
| VIC9247 | EPI_ISL_562688  |
| VIC9248 | EPI_ISL_565464  |
| VIC9250 | EPI_ISL_565465  |
| VIC9251 | EPI_ISL_565466  |
| VIC9252 | EPI_ISL_565467  |
| VIC9253 | EPI_ISL_565468  |
| VIC9254 | EPI_ISL_565469  |
| VIC9255 | EPI_ISL_565470  |
| VIC9256 | EPI_ISL_565471  |
| VIC9257 | EPI_ISL_565472  |
| VIC9258 | EPI_ISL_565473  |
| VIC9259 | EPI_ISL_562670  |
| VIC9260 | EPI_ISL_565474  |
| VIC9264 | EPI_ISL_565475  |
| VIC9266 | EPI_ISL_565476  |
| VIC9267 | EPI_ISL_565477  |
| VIC927  | EPI_ISL_427155  |
| VIC9274 | EPI_ISL_565478  |
| VIC9275 | EPI_ISL_561742  |
| VIC9276 | EPI_ISL_1055349 |
| VIC9277 | EPI_ISL_565479  |



|         |                |
|---------|----------------|
| VIC9278 | EPI_ISL_565480 |
| VIC9279 | EPI_ISL_565481 |
| VIC928  | EPI_ISL_427156 |
| VIC9281 | EPI_ISL_562027 |
| VIC9282 | EPI_ISL_562630 |
| VIC9283 | EPI_ISL_565482 |
| VIC9284 | EPI_ISL_565483 |
| VIC9285 | EPI_ISL_565484 |
| VIC9286 | EPI_ISL_561907 |
| VIC9287 | EPI_ISL_565485 |
| VIC9288 | EPI_ISL_565486 |
| VIC9290 | EPI_ISL_565487 |
| VIC9292 | EPI_ISL_565488 |
| VIC9293 | EPI_ISL_565489 |
| VIC9294 | EPI_ISL_565490 |
| VIC9295 | EPI_ISL_565491 |
| VIC9296 | EPI_ISL_565492 |
| VIC9298 | EPI_ISL_565493 |
| VIC9299 | EPI_ISL_565494 |
| VIC93   | EPI_ISL_419815 |
| VIC930  | EPI_ISL_427158 |
| VIC9300 | EPI_ISL_565495 |
| VIC9302 | EPI_ISL_565496 |
| VIC9303 | EPI_ISL_565497 |
| VIC9304 | EPI_ISL_561925 |
| VIC9305 | EPI_ISL_562631 |
| VIC9306 | EPI_ISL_565498 |
| VIC9307 | EPI_ISL_561524 |
| VIC931  | EPI_ISL_427159 |
| VIC9311 | EPI_ISL_565499 |
| VIC9312 | EPI_ISL_565500 |
| VIC9313 | EPI_ISL_565501 |
| VIC9314 | EPI_ISL_565502 |
| VIC9316 | EPI_ISL_562632 |
| VIC9317 | EPI_ISL_561956 |
| VIC9318 | EPI_ISL_565503 |
| VIC9319 | EPI_ISL_565504 |
| VIC932  | EPI_ISL_427160 |
| VIC9321 | EPI_ISL_565505 |
| VIC9322 | EPI_ISL_565506 |
| VIC9323 | EPI_ISL_565507 |
| VIC9324 | EPI_ISL_565508 |
| VIC9325 | EPI_ISL_562633 |
| VIC9340 | Rejected       |
| VIC9343 | EPI_ISL_565510 |
| VIC9345 | EPI_ISL_565512 |
| VIC9346 | EPI_ISL_565513 |
| VIC9349 | EPI_ISL_565514 |
| VIC935  | EPI_ISL_430471 |
| VIC9350 | EPI_ISL_565515 |
| VIC9351 | EPI_ISL_565516 |
| VIC9353 | EPI_ISL_565517 |

|         |                 |
|---------|-----------------|
| VIC9354 | EPI_ISL_565518  |
| VIC9356 | EPI_ISL_565519  |
| VIC9357 | EPI_ISL_562017  |
| VIC9359 | EPI_ISL_565520  |
| VIC936  | EPI_ISL_430470  |
| VIC9362 | EPI_ISL_562672  |
| VIC9363 | EPI_ISL_565521  |
| VIC9365 | EPI_ISL_565522  |
| VIC9366 | EPI_ISL_565523  |
| VIC9367 | EPI_ISL_565524  |
| VIC9368 | EPI_ISL_565525  |
| VIC9371 | EPI_ISL_565526  |
| VIC9373 | EPI_ISL_1055350 |
| VIC9374 | EPI_ISL_565527  |
| VIC9375 | EPI_ISL_565528  |
| VIC9376 | EPI_ISL_565529  |
| VIC9377 | EPI_ISL_565530  |
| VIC9379 | EPI_ISL_565532  |
| VIC938  | EPI_ISL_430472  |
| VIC9381 | EPI_ISL_1055351 |
| VIC9382 | EPI_ISL_565533  |
| VIC9383 | EPI_ISL_565534  |
| VIC9384 | Rejected        |
| VIC9385 | Rejected        |
| VIC9386 | Rejected        |
| VIC9387 | Rejected        |
| VIC9389 | EPI_ISL_565535  |
| VIC9396 | EPI_ISL_562673  |
| VIC9397 | EPI_ISL_565536  |
| VIC94   | EPI_ISL_419805  |
| VIC9400 | EPI_ISL_561557  |
| VIC9401 | EPI_ISL_561700  |
| VIC9403 | EPI_ISL_565537  |
| VIC9408 | EPI_ISL_565538  |
| VIC9409 | EPI_ISL_565539  |
| VIC9410 | EPI_ISL_562674  |
| VIC9411 | EPI_ISL_562675  |
| VIC9412 | EPI_ISL_562676  |
| VIC9413 | EPI_ISL_565540  |
| VIC9415 | EPI_ISL_561882  |
| VIC9416 | EPI_ISL_565541  |
| VIC9419 | EPI_ISL_562159  |
| VIC942  | EPI_ISL_430639  |
| VIC9420 | EPI_ISL_565542  |
| VIC9422 | EPI_ISL_562698  |
| VIC9424 | EPI_ISL_565543  |
| VIC9425 | EPI_ISL_562677  |
| VIC943  | EPI_ISL_1055352 |
| VIC9430 | EPI_ISL_565545  |
| VIC9431 | EPI_ISL_565546  |
| VIC9432 | EPI_ISL_561689  |
| VIC9433 | EPI_ISL_565547  |

|         |                 |
|---------|-----------------|
| VIC9434 | EPI_ISL_561662  |
| VIC9435 | EPI_ISL_565548  |
| VIC9436 | EPI_ISL_565549  |
| VIC9437 | EPI_ISL_565550  |
| VIC9438 | EPI_ISL_565551  |
| VIC9439 | EPI_ISL_565552  |
| VIC944  | EPI_ISL_430642  |
| VIC9440 | EPI_ISL_565553  |
| VIC9441 | EPI_ISL_565554  |
| VIC9442 | EPI_ISL_562634  |
| VIC9443 | EPI_ISL_565555  |
| VIC9444 | EPI_ISL_565556  |
| VIC9446 | EPI_ISL_561522  |
| VIC9448 | EPI_ISL_562678  |
| VIC9451 | EPI_ISL_561446  |
| VIC9452 | EPI_ISL_565557  |
| VIC9454 | EPI_ISL_565558  |
| VIC9455 | EPI_ISL_565559  |
| VIC9456 | EPI_ISL_565560  |
| VIC9459 | EPI_ISL_565561  |
| VIC946  | EPI_ISL_430640  |
| VIC9460 | EPI_ISL_565562  |
| VIC9461 | EPI_ISL_561966  |
| VIC9462 | EPI_ISL_1055353 |
| VIC9463 | EPI_ISL_561628  |
| VIC9464 | EPI_ISL_561547  |
| VIC9466 | EPI_ISL_562679  |
| VIC9467 | EPI_ISL_565563  |
| VIC9468 | EPI_ISL_561617  |
| VIC9469 | Rejected        |
| VIC9474 | EPI_ISL_565564  |
| VIC9476 | EPI_ISL_565566  |
| VIC9478 | EPI_ISL_565567  |
| VIC9479 | EPI_ISL_561499  |
| VIC948  | EPI_ISL_430647  |
| VIC9481 | EPI_ISL_561976  |
| VIC9482 | EPI_ISL_561474  |
| VIC9483 | EPI_ISL_561422  |
| VIC9486 | EPI_ISL_565568  |
| VIC9488 | EPI_ISL_565569  |
| VIC9489 | EPI_ISL_565570  |
| VIC949  | EPI_ISL_430641  |
| VIC9490 | EPI_ISL_565571  |
| VIC9491 | EPI_ISL_565572  |
| VIC9492 | EPI_ISL_565573  |
| VIC9494 | EPI_ISL_565574  |
| VIC9496 | EPI_ISL_565575  |
| VIC9497 | EPI_ISL_561781  |
| VIC9498 | EPI_ISL_561615  |
| VIC9499 | EPI_ISL_565576  |
| VIC95   | EPI_ISL_419806  |
| VIC950  | Rejected        |

|         |                 |
|---------|-----------------|
| VIC9500 | Rejected        |
| VIC9501 | Rejected        |
| VIC9502 | EPI_ISL_562680  |
| VIC9503 | EPI_ISL_561611  |
| VIC9504 | EPI_ISL_565577  |
| VIC9505 | EPI_ISL_565578  |
| VIC9506 | EPI_ISL_565579  |
| VIC9507 | EPI_ISL_562019  |
| VIC9508 | EPI_ISL_565580  |
| VIC9509 | EPI_ISL_561649  |
| VIC951  | EPI_ISL_430646  |
| VIC9510 | EPI_ISL_562742  |
| VIC9512 | EPI_ISL_565581  |
| VIC9513 | EPI_ISL_561654  |
| VIC9516 | EPI_ISL_565582  |
| VIC9517 | EPI_ISL_565583  |
| VIC9519 | Rejected        |
| VIC9520 | EPI_ISL_565584  |
| VIC9521 | EPI_ISL_565585  |
| VIC9522 | EPI_ISL_565586  |
| VIC9523 | EPI_ISL_561445  |
| VIC9524 | EPI_ISL_565587  |
| VIC9526 | EPI_ISL_565588  |
| VIC9528 | EPI_ISL_565589  |
| VIC9529 | EPI_ISL_561645  |
| VIC953  | EPI_ISL_430645  |
| VIC9532 | EPI_ISL_562743  |
| VIC9533 | EPI_ISL_565590  |
| VIC9534 | EPI_ISL_565591  |
| VIC9535 | EPI_ISL_561502  |
| VIC9537 | EPI_ISL_565592  |
| VIC9539 | EPI_ISL_561880  |
| VIC9540 | EPI_ISL_565593  |
| VIC9541 | EPI_ISL_565594  |
| VIC9542 | EPI_ISL_594145  |
| VIC9543 | EPI_ISL_565595  |
| VIC9544 | EPI_ISL_565596  |
| VIC9545 | EPI_ISL_565597  |
| VIC9546 | EPI_ISL_561536  |
| VIC955  | EPI_ISL_430643  |
| VIC9550 | EPI_ISL_561914  |
| VIC9551 | EPI_ISL_565598  |
| VIC9553 | EPI_ISL_562031  |
| VIC9555 | EPI_ISL_565599  |
| VIC9556 | EPI_ISL_565600  |
| VIC9557 | EPI_ISL_561606  |
| VIC9558 | EPI_ISL_565601  |
| VIC9559 | EPI_ISL_565602  |
| VIC956  | EPI_ISL_430529  |
| VIC9562 | EPI_ISL_565603  |
| VIC9563 | EPI_ISL_1055354 |
| VIC9564 | EPI_ISL_565604  |

|         |                |
|---------|----------------|
| VIC9566 | EPI_ISL_561435 |
| VIC9567 | EPI_ISL_565605 |
| VIC9568 | EPI_ISL_562142 |
| VIC9569 | EPI_ISL_561601 |
| VIC957  | EPI_ISL_430649 |
| VIC9570 | EPI_ISL_565606 |
| VIC9572 | EPI_ISL_565607 |
| VIC9573 | EPI_ISL_565608 |
| VIC9574 | EPI_ISL_565609 |
| VIC9579 | EPI_ISL_565610 |
| VIC9581 | EPI_ISL_561485 |
| VIC9582 | EPI_ISL_565611 |
| VIC9583 | EPI_ISL_565612 |
| VIC9584 | EPI_ISL_565613 |
| VIC9585 | EPI_ISL_565614 |
| VIC9586 | EPI_ISL_565615 |
| VIC9587 | EPI_ISL_565616 |
| VIC9589 | EPI_ISL_562160 |
| VIC959  | EPI_ISL_430663 |
| VIC9590 | EPI_ISL_562681 |
| VIC9591 | EPI_ISL_562682 |
| VIC9592 | EPI_ISL_562683 |
| VIC9593 | EPI_ISL_562684 |
| VIC9597 | EPI_ISL_565618 |
| VIC9598 | EPI_ISL_561687 |
| VIC9599 | EPI_ISL_565619 |
| VIC96   | EPI_ISL_419807 |
| VIC960  | EPI_ISL_430648 |
| VIC9600 | EPI_ISL_565620 |
| VIC9602 | EPI_ISL_562685 |
| VIC9603 | EPI_ISL_565621 |
| VIC9604 | EPI_ISL_565622 |
| VIC961  | EPI_ISL_430654 |
| VIC9610 | EPI_ISL_565624 |
| VIC9611 | EPI_ISL_565625 |
| VIC9613 | EPI_ISL_561950 |
| VIC9614 | EPI_ISL_565626 |
| VIC9615 | EPI_ISL_565627 |
| VIC9616 | EPI_ISL_561487 |
| VIC9618 | EPI_ISL_565628 |
| VIC9619 | EPI_ISL_565629 |
| VIC962  | EPI_ISL_430656 |
| VIC9620 | EPI_ISL_561773 |
| VIC9621 | EPI_ISL_565630 |
| VIC9624 | EPI_ISL_565631 |
| VIC9633 | EPI_ISL_562744 |
| VIC9634 | EPI_ISL_562745 |
| VIC9635 | EPI_ISL_562746 |
| VIC9636 | EPI_ISL_562747 |
| VIC9637 | EPI_ISL_562748 |
| VIC9638 | EPI_ISL_565633 |
| VIC9639 | EPI_ISL_561640 |

|         |                 |
|---------|-----------------|
| VIC964  | EPI_ISL_430655  |
| VIC9640 | EPI_ISL_565634  |
| VIC9642 | EPI_ISL_565635  |
| VIC9643 | EPI_ISL_562125  |
| VIC9645 | EPI_ISL_565636  |
| VIC9646 | EPI_ISL_565637  |
| VIC9648 | EPI_ISL_562143  |
| VIC9649 | EPI_ISL_1055355 |
| VIC965  | EPI_ISL_430650  |
| VIC9650 | EPI_ISL_561931  |
| VIC9651 | EPI_ISL_565638  |
| VIC9652 | EPI_ISL_565639  |
| VIC9654 | EPI_ISL_565640  |
| VIC9655 | Rejected        |
| VIC9657 | Rejected        |
| VIC9658 | Rejected        |
| VIC9659 | Rejected        |
| VIC966  | EPI_ISL_430653  |
| VIC9661 | Rejected        |
| VIC9662 | EPI_ISL_565641  |
| VIC9664 | EPI_ISL_565642  |
| VIC9666 | EPI_ISL_565643  |
| VIC9667 | EPI_ISL_565644  |
| VIC9668 | EPI_ISL_565645  |
| VIC967  | EPI_ISL_430660  |
| VIC9673 | EPI_ISL_565646  |
| VIC9674 | EPI_ISL_1055356 |
| VIC9675 | EPI_ISL_565647  |
| VIC9676 | EPI_ISL_565648  |
| VIC9677 | EPI_ISL_565649  |
| VIC9679 | Rejected        |
| VIC968  | EPI_ISL_430651  |
| VIC9680 | EPI_ISL_565650  |
| VIC9682 | EPI_ISL_565651  |
| VIC9685 | EPI_ISL_565652  |
| VIC9686 | EPI_ISL_565653  |
| VIC9688 | EPI_ISL_565654  |
| VIC9689 | EPI_ISL_565655  |
| VIC9691 | EPI_ISL_565656  |
| VIC9693 | EPI_ISL_561848  |
| VIC9694 | EPI_ISL_565657  |
| VIC9695 | EPI_ISL_565658  |
| VIC9696 | EPI_ISL_565659  |
| VIC9697 | EPI_ISL_565660  |
| VIC9698 | EPI_ISL_565661  |
| VIC97   | EPI_ISL_419808  |
| VIC970  | EPI_ISL_430662  |
| VIC9700 | EPI_ISL_565662  |
| VIC9705 | EPI_ISL_565663  |
| VIC9707 | EPI_ISL_565664  |
| VIC9708 | EPI_ISL_565665  |
| VIC971  | EPI_ISL_430661  |

|         |                 |
|---------|-----------------|
| VIC9711 | EPI_ISL_565666  |
| VIC9713 | EPI_ISL_565667  |
| VIC9714 | EPI_ISL_565668  |
| VIC9715 | EPI_ISL_565669  |
| VIC9717 | EPI_ISL_565671  |
| VIC9720 | EPI_ISL_565672  |
| VIC9721 | EPI_ISL_562025  |
| VIC9722 | EPI_ISL_565673  |
| VIC9724 | EPI_ISL_565674  |
| VIC9725 | EPI_ISL_565675  |
| VIC9726 | EPI_ISL_565676  |
| VIC9727 | EPI_ISL_561675  |
| VIC9728 | EPI_ISL_565677  |
| VIC9729 | EPI_ISL_565678  |
| VIC9730 | EPI_ISL_565679  |
| VIC9731 | EPI_ISL_1055357 |
| VIC9735 | EPI_ISL_565682  |
| VIC9736 | EPI_ISL_565683  |
| VIC9738 | EPI_ISL_565684  |
| VIC9739 | EPI_ISL_565685  |
| VIC974  | EPI_ISL_430659  |
| VIC9740 | EPI_ISL_565686  |
| VIC9744 | EPI_ISL_565687  |
| VIC9745 | EPI_ISL_565688  |
| VIC9746 | EPI_ISL_565689  |
| VIC9748 | EPI_ISL_565690  |
| VIC9749 | EPI_ISL_565691  |
| VIC975  | EPI_ISL_430658  |
| VIC9750 | EPI_ISL_565692  |
| VIC9752 | EPI_ISL_565693  |
| VIC9755 | EPI_ISL_561610  |
| VIC9756 | EPI_ISL_565694  |
| VIC9757 | EPI_ISL_561594  |
| VIC9758 | EPI_ISL_565695  |
| VIC9759 | EPI_ISL_561644  |
| VIC9760 | EPI_ISL_565696  |
| VIC9761 | EPI_ISL_565697  |
| VIC9762 | EPI_ISL_565698  |
| VIC9763 | EPI_ISL_565699  |
| VIC9764 | EPI_ISL_565700  |
| VIC9765 | EPI_ISL_565701  |
| VIC9766 | EPI_ISL_565702  |
| VIC9767 | EPI_ISL_565703  |
| VIC9770 | EPI_ISL_565704  |
| VIC9772 | EPI_ISL_565705  |
| VIC9774 | EPI_ISL_565706  |
| VIC9775 | EPI_ISL_565707  |
| VIC9777 | EPI_ISL_565708  |
| VIC9778 | EPI_ISL_565709  |
| VIC9779 | EPI_ISL_562097  |
| VIC978  | EPI_ISL_430542  |
| VIC9780 | EPI_ISL_565710  |

|         |                 |
|---------|-----------------|
| VIC9781 | EPI_ISL_565711  |
| VIC9783 | EPI_ISL_565712  |
| VIC9784 | EPI_ISL_565713  |
| VIC9785 | EPI_ISL_565714  |
| VIC9786 | EPI_ISL_565715  |
| VIC9787 | EPI_ISL_565716  |
| VIC9788 | EPI_ISL_565717  |
| VIC9789 | EPI_ISL_565718  |
| VIC9790 | EPI_ISL_561952  |
| VIC9791 | EPI_ISL_565719  |
| VIC9792 | EPI_ISL_565720  |
| VIC9793 | EPI_ISL_565721  |
| VIC9796 | EPI_ISL_565722  |
| VIC9798 | EPI_ISL_565723  |
| VIC98   | EPI_ISL_419810  |
| VIC9800 | EPI_ISL_565724  |
| VIC9805 | EPI_ISL_565727  |
| VIC9808 | EPI_ISL_565729  |
| VIC9816 | EPI_ISL_565733  |
| VIC982  | EPI_ISL_430543  |
| VIC9823 | EPI_ISL_561465  |
| VIC9824 | EPI_ISL_565734  |
| VIC9828 | EPI_ISL_561655  |
| VIC983  | EPI_ISL_430545  |
| VIC9832 | EPI_ISL_565736  |
| VIC9833 | EPI_ISL_565737  |
| VIC9834 | EPI_ISL_561690  |
| VIC9835 | EPI_ISL_565738  |
| VIC9837 | EPI_ISL_565739  |
| VIC9838 | EPI_ISL_565740  |
| VIC9839 | EPI_ISL_565741  |
| VIC984  | EPI_ISL_430552  |
| VIC9846 | EPI_ISL_561440  |
| VIC9849 | Rejected        |
| VIC985  | EPI_ISL_430554  |
| VIC9851 | EPI_ISL_565742  |
| VIC9853 | EPI_ISL_1055358 |
| VIC9857 | EPI_ISL_565743  |
| VIC9858 | EPI_ISL_565744  |
| VIC986  | EPI_ISL_430557  |
| VIC9860 | EPI_ISL_565745  |
| VIC9861 | EPI_ISL_565746  |
| VIC9862 | EPI_ISL_565747  |
| VIC9864 | EPI_ISL_565748  |
| VIC9865 | EPI_ISL_565749  |
| VIC9866 | EPI_ISL_565750  |
| VIC9867 | EPI_ISL_565751  |
| VIC9868 | EPI_ISL_562686  |
| VIC9869 | EPI_ISL_561732  |
| VIC987  | EPI_ISL_430558  |
| VIC9870 | EPI_ISL_565752  |
| VIC9871 | EPI_ISL_565753  |



|         |                 |
|---------|-----------------|
| VIC9872 | EPI_ISL_565754  |
| VIC9873 | EPI_ISL_565755  |
| VIC9874 | EPI_ISL_565756  |
| VIC9875 | EPI_ISL_565757  |
| VIC9877 | EPI_ISL_565758  |
| VIC9878 | EPI_ISL_565759  |
| VIC9879 | EPI_ISL_565760  |
| VIC9880 | EPI_ISL_565761  |
| VIC9881 | EPI_ISL_565762  |
| VIC9882 | EPI_ISL_562039  |
| VIC9883 | EPI_ISL_565763  |
| VIC9884 | EPI_ISL_562749  |
| VIC9885 | EPI_ISL_561886  |
| VIC9886 | EPI_ISL_562040  |
| VIC9889 | EPI_ISL_565764  |
| VIC989  | EPI_ISL_430551  |
| VIC9890 | EPI_ISL_565765  |
| VIC9892 | EPI_ISL_565766  |
| VIC9893 | EPI_ISL_565767  |
| VIC9894 | EPI_ISL_561908  |
| VIC9895 | EPI_ISL_565768  |
| VIC9898 | EPI_ISL_565769  |
| VIC9899 | EPI_ISL_565770  |
| VIC99   | EPI_ISL_419811  |
| VIC990  | EPI_ISL_430556  |
| VIC9900 | EPI_ISL_565771  |
| VIC9901 | EPI_ISL_562750  |
| VIC9902 | EPI_ISL_565772  |
| VIC9903 | EPI_ISL_565773  |
| VIC9904 | EPI_ISL_565774  |
| VIC9905 | EPI_ISL_562687  |
| VIC9906 | EPI_ISL_565775  |
| VIC9907 | EPI_ISL_565776  |
| VIC9908 | EPI_ISL_565777  |
| VIC991  | EPI_ISL_430474  |
| VIC9916 | EPI_ISL_1055359 |
| VIC9917 | EPI_ISL_565779  |
| VIC9918 | EPI_ISL_565780  |
| VIC992  | EPI_ISL_430475  |
| VIC9920 | EPI_ISL_562174  |
| VIC9921 | EPI_ISL_565781  |
| VIC9922 | EPI_ISL_565782  |
| VIC9925 | EPI_ISL_565783  |
| VIC9927 | EPI_ISL_565784  |
| VIC993  | EPI_ISL_430477  |
| VIC9934 | EPI_ISL_565785  |
| VIC9935 | EPI_ISL_565786  |
| VIC9936 | EPI_ISL_565787  |
| VIC9937 | EPI_ISL_565788  |
| VIC9938 | EPI_ISL_565789  |
| VIC9939 | EPI_ISL_565790  |
| VIC994  | EPI_ISL_430478  |

|         |                 |
|---------|-----------------|
| VIC9940 | EPI_ISL_562759  |
| VIC9941 | EPI_ISL_565791  |
| VIC9942 | EPI_ISL_561962  |
| VIC9943 | EPI_ISL_565792  |
| VIC9944 | EPI_ISL_565793  |
| VIC9945 | EPI_ISL_565794  |
| VIC9946 | EPI_ISL_565795  |
| VIC9947 | EPI_ISL_565796  |
| VIC9948 | EPI_ISL_565797  |
| VIC9949 | EPI_ISL_565798  |
| VIC995  | EPI_ISL_430479  |
| VIC9950 | EPI_ISL_561529  |
| VIC9951 | EPI_ISL_565799  |
| VIC9952 | EPI_ISL_565800  |
| VIC9954 | EPI_ISL_1055360 |
| VIC9955 | EPI_ISL_565801  |
| VIC9956 | EPI_ISL_565802  |
| VIC9957 | EPI_ISL_565803  |
| VIC9958 | EPI_ISL_565804  |
| VIC9959 | EPI_ISL_565805  |
| VIC996  | EPI_ISL_430480  |
| VIC9960 | EPI_ISL_561520  |
| VIC9961 | EPI_ISL_565806  |
| VIC9962 | EPI_ISL_565807  |
| VIC9963 | EPI_ISL_561619  |
| VIC9964 | EPI_ISL_565808  |
| VIC9965 | EPI_ISL_565809  |
| VIC9966 | EPI_ISL_565810  |
| VIC9967 | EPI_ISL_565811  |
| VIC9968 | EPI_ISL_565812  |
| VIC9969 | EPI_ISL_565813  |
| VIC997  | EPI_ISL_430481  |
| VIC9970 | EPI_ISL_562760  |
| VIC9971 | EPI_ISL_565814  |
| VIC9972 | EPI_ISL_565815  |
| VIC9973 | EPI_ISL_565816  |
| VIC9974 | EPI_ISL_565817  |
| VIC9975 | EPI_ISL_565818  |
| VIC9976 | EPI_ISL_565819  |
| VIC9977 | EPI_ISL_565820  |
| VIC9978 | EPI_ISL_565821  |
| VIC9979 | EPI_ISL_565822  |
| VIC998  | EPI_ISL_430482  |
| VIC9980 | EPI_ISL_561819  |
| VIC9983 | EPI_ISL_561992  |
| VIC9985 | EPI_ISL_565823  |
| VIC9986 | EPI_ISL_565824  |
| VIC9987 | EPI_ISL_562751  |
| VIC9988 | EPI_ISL_562752  |
| VIC9989 | EPI_ISL_562041  |
| VIC999  | EPI_ISL_430483  |
| VIC9990 | EPI_ISL_562753  |

|         |                |
|---------|----------------|
| VIC9992 | EPI_ISL_565825 |
| VIC9993 | EPI_ISL_565826 |
| VIC9994 | EPI_ISL_562636 |
| VIC9995 | EPI_ISL_565827 |
| VIC9997 | EPI_ISL_565828 |
| VIC9998 | EPI_ISL_562727 |
| VIC9999 | EPI_ISL_565829 |
